# Supplementary material for: UV-B irradiation promotes anthocyanin biosynthesis in the leaves of Lycium ruthenicum Murray
Source: PeerJ. 2024 Oct 14;12:e18199. doi: 10.7717/peerj.18199 (PMC11485054; doi:10.7717/peerj.18199)
Supplement: Supplemental Information 2 [file peerj-12-18199-s002.xlsx]

## Sheet: UVR8
id	Lr-CK-1_count	Lr-CK-2_count	Lr-CK-3_count	Lr-UV-B-1_count	Lr-UV-B-2_count	Lr-UV-B-3_count	Lr-CK-1_fpkm	Lr-CK-2_fpkm	Lr-CK-3_fpkm	Lr-UV-B-1_fpkm	Lr-UV-B-2_fpkm	Lr-UV-B-3_fpkm	A_mean	B_mean	log2(fc)	PValue	FDR	Symbol	Description	KEGG_A_class	KEGG_B_class	Pathway	K_ID	GO Component	GO Function	GO Process	TF_family
Unigene0015353	1255	1208	1759	463	387	467	34.323	32.714	40.498	13.535	12.232	13.711	35.845	13.1593	-1.44569	8.8327e-19	1.69846e-17	UVR8	KAH0669177.1 hypothetical protein KY289_023670 [Solanum tuberosum]	-	-	-	-	-	-	-	--
Unigene0003921	808	814	898	251	212	238	41.797	41.695	39.105	13.879	12.674	13.216	40.8657	13.2563	-1.62421	1.36528e-18	2.59167e-17	UVR8	XP_016553507.1 PREDICTED: ultraviolet-B receptor UVR8 isoform X2 [Capsicum annuum]	-	-	-	-	GO:0000785//chromatin;GO:0005575//cellular_component;GO:0005622//intracellular anatomical structure;GO:0005634//nucleus;GO:0005694//chromosome;GO:0005737//cytoplasm;GO:0005829//cytosol;GO:0043226//organelle;GO:0043227//membrane-bounded organelle;GO:0043228//non-membrane-bounded organelle;GO:0043229//intracellular organelle;GO:0043231//intracellular membrane-bounded organelle;GO:0043232//intracell…	GO:0003674//molecular_function;GO:0003682//chromatin binding;GO:0005085//guanyl-nucleotide exchange factor activity;GO:0005488//binding;GO:0005515//protein binding;GO:0009881//photoreceptor activity;GO:0019899//enzyme binding;GO:0038023//signaling receptor activity;GO:0042802//identical protein binding;GO:0042803//protein homodimerization activity;GO:0046983//protein dimerization activity;GO:0051…	GO:0006464//cellular protein modification process;GO:0006807//nitrogen compound metabolic process;GO:0007154//cell communication;GO:0007165//signal transduction;GO:0008150//biological_process;GO:0008152//metabolic process;GO:0009314//response to radiation;GO:0009411//response to UV;GO:0009416//response to light stimulus;GO:0009605//response to external stimulus;GO:0009628//response to abiotic sti…	--
Unigene0067978	171	127	219	353	349	367	4.677	3.439	5.042	10.32	11.031	10.775	4.386	10.7087	1.2878	1.08654e-11	1.30178e-10	Rcbtb1	XP_019239275.1 PREDICTED: ultraviolet-B receptor UVR8 [Nicotiana attenuata]	-	-	-	-	-	-	-	--
Unigene0020095	174	239	239	100	76	54	8.876	12.072	10.263	5.453	4.481	2.957	10.4037	4.297	-1.27569	7.71408e-05	0.000466376	UVR8	XP_006360014.1 PREDICTED: ultraviolet-B receptor UVR8 isoform X1 [Solanum tuberosum]	-	-	-	-	-	-	-	--
Unigene0078284	148	137	196	75	58	61	7.098	6.506	7.913	3.845	3.215	3.14	7.17233	3.4	-1.07691	0.000335484	0.00183391	UVR8	XP_006345746.1 PREDICTED: ultraviolet-B receptor UVR8 isoform X2 [Solanum tuberosum]	-	-	-	-	-	-	-	--

## Sheet: cop1
id	Lr-CK-1_count	Lr-CK-2_count	Lr-CK-3_count	Lr-UV-B-1_count	Lr-UV-B-2_count	Lr-UV-B-3_count	Lr-CK-1_fpkm	Lr-CK-2_fpkm	Lr-CK-3_fpkm	Lr-UV-B-1_fpkm	Lr-UV-B-2_fpkm	Lr-UV-B-3_fpkm	A_mean	B_mean	log2(fc)	PValue	FDR	Symbol	Description	KEGG_A_class	KEGG_B_class	Pathway	K_ID	GO Component	GO Function	GO Process	TF_family
Unigene0008780	2148	2120	3269	1005	767	1091	48.338	47.24	61.928	24.175	19.948	26.355	52.502	23.4927	-1.16016	1.6204e-10	1.77844e-09	--	XP_004246103.1 COP1-interactive protein 1-like [Solanum lycopersicum]	-	-	-	-	GO:0005840//ribosome	GO:0003735//structural constituent of ribosome;GO:0003779//actin binding;GO:0005524//ATP binding	GO:0006412//translation;GO:0007059//chromosome segregation;GO:0030261//chromosome condensation	--

## Sheet: HY5
id	Lr-CK-1_count	Lr-CK-2_count	Lr-CK-3_count	Lr-UV-B-1_count	Lr-UV-B-2_count	Lr-UV-B-3_count	Lr-CK-1_fpkm	Lr-CK-2_fpkm	Lr-CK-3_fpkm	Lr-UV-B-1_fpkm	Lr-UV-B-2_fpkm	Lr-UV-B-3_fpkm	A_mean	B_mean	log2(fc)	PValue	FDR	Symbol	Description	KEGG_A_class	KEGG_B_class	Pathway	K_ID	GO Component	GO Function	GO Process	TF_family
Unigene0072293	15	4	13	84	33	64	1.561	0.412	1.139	9.344	3.969	7.15	1.03733	6.821	2.7171	4.70863e-07	3.71854e-06	HY5	XP_016537585.1 PREDICTED: transcription factor HY5 [Capsicum annuum]	Organismal Systems	Environmental adaptation	ko04712//Circadian rhythm - plant	K16241	GO:0000228//nuclear chromosome;GO:0000785//chromatin;GO:0005575//cellular_component;GO:0005622//intracellular anatomical structure;GO:0005634//nucleus;GO:0005667//transcription regulator complex;GO:0005694//chromosome;GO:0031514//motile cilium;GO:0031974//membrane-enclosed lumen;GO:0031981//nuclear lumen;GO:0032991//protein-containing complex;GO:0032993//protein-DNA complex;GO:0035976//transcript…	GO:0000976//transcription cis-regulatory region binding;GO:0000977//RNA polymerase II transcription regulatory region sequence-specific DNA binding;GO:0000978//RNA polymerase II cis-regulatory region sequence-specific DNA binding;GO:0000981//DNA-binding transcription factor activity, RNA polymerase II-specific;GO:0000987//cis-regulatory region sequence-specific DNA binding;GO:0001067//transcripti…	GO:0000003//reproduction;GO:0000018//regulation of DNA recombination;GO:0000122//negative regulation of transcription by RNA polymerase II;GO:0000165//MAPK cascade;GO:0000280//nuclear division;GO:0001101//response to acid chemical;GO:0006139//nucleobase-containing compound metabolic process;GO:0006259//DNA metabolic process;GO:0006310//DNA recombination;GO:0006323//DNA packaging;GO:0006325//chrom…	bZIP
