# Supplementary material for: UV-B irradiation promotes anthocyanin biosynthesis in the leaves of Lycium ruthenicum Murray
Source: PeerJ. 2024 Oct 14;12:e18199. doi: 10.7717/peerj.18199 (PMC11485054; doi:10.7717/peerj.18199)
Supplement: Supplemental Information 4 [file peerj-12-18199-s004.xlsx]

## Sheet: WRKY
id	Symbol	Lr-CK-1_fpkm	Lr-CK-2_fpkm	Lr-CK-3_fpkm	Lr-UV-B-1_fpkm	Lr-UV-B-2_fpkm	Lr-UV-B-3_fpkm	A	B	A-vs-B-log2fc	A-vs-B-pvalue	A-vs-B-fdr	TF_family	Description	Pathway	GO Component	GO Function	GO Process
Unigene0006043	WRKY28	0.056	0.279	0.095	10.308	7.104	10.05	0.1433	9.154	5.99696	7.17979e-24	1.87115e-22	WRKY	KAF3622752.1 putative WRKY transcription factor 23 [Capsicum annuum]	-	-	GO:0003700//DNA-binding transcription factor activity;GO:0043565//sequence-specific DNA binding	GO:0006355//regulation of transcription, DNA-templated
Unigene0006099	WRKY53	2.989	0.888	1.887	28.558	11.358	9.787	1.9213	16.5677	3.10819	2.03412e-06	1.50521e-05	WRKY	ANW07460.1 WRKY transcription factor [Lycium barbarum]	-	-	GO:0003700//DNA-binding transcription factor activity;GO:0043565//sequence-specific DNA binding	GO:0006355//regulation of transcription, DNA-templated
Unigene0009384	WRKY51	0.038	0	0.065	30.709	20.996	15.379	0.0343	22.3613	9.34718	1.58934e-26	4.82086e-25	WRKY	XP_019233270.1 PREDICTED: probable WRKY transcription factor 51 isoform X1 [Nicotiana attenuata]	-	GO:0005575//cellular_component;GO:0005622//intracellular anatomical structure;GO:0005634//nucleus;GO:0043226//organelle;GO:0043227//membrane-bounded organelle;GO:0043229//intracellular organelle;GO:0043231//intracellular membrane-bounded organelle	GO:0003674//molecular_function;GO:0003676//nucleic acid binding;GO:0003677//DNA binding;GO:0003700//DNA-binding transcription factor activity;GO:0005488//binding;GO:0043565//sequence-specific DNA binding;GO:0097159//organic cyclic compound binding;GO:0140110//transcription regulator activity;GO:1901363//heterocyclic compound binding	GO:0001101//response to acid chemical;GO:0006139//nucleobase-containing compound metabolic process;GO:0006351//transcription, DNA-templated;GO:0006355//regulation of transcription, DNA-templated;GO:0006725//cellular aromatic compound metabolic process;GO:0006807//nitrogen compound metabolic process;GO:0006950//response to stress;GO:0006952//defense response;GO:0007154//cell communication;GO:00071…
Unigene0013893	WRKY70	1.129	0.647	0.4	61.374	55.162	71.271	0.7253	62.6023	6.43143	2.87495e-98	9.1981e-96	WRKY	XP_016436463.1 PREDICTED: probable WRKY transcription factor 70 [Nicotiana tabacum]	-	-	GO:0003700//DNA-binding transcription factor activity;GO:0043565//sequence-specific DNA binding	GO:0006355//regulation of transcription, DNA-templated
Unigene0017145	WRKY51	0	0	0	4.906	3.573	3.821	0	4.1	12.0014	5.24676e-10	5.48884e-09	WRKY	XP_009763636.1 PREDICTED: probable WRKY transcription factor 51 [Nicotiana sylvestris]	-	-	GO:0003700//DNA-binding transcription factor activity;GO:0043565//sequence-specific DNA binding	GO:0006355//regulation of transcription, DNA-templated
Unigene0017146	WRKY51	0.246	0	0	2.756	2.412	3.031	0.082	2.733	5.05872	3.18109e-05	0.00020298	WRKY	XP_015060567.1 probable WRKY transcription factor 51 [Solanum pennellii]	-	-	GO:0003700//DNA-binding transcription factor activity;GO:0043565//sequence-specific DNA binding	GO:0006355//regulation of transcription, DNA-templated
Unigene0021427	WRKY72A	0	0.192	0.041	4.869	2.296	2.861	0.0777	3.342	5.42727	1.34231e-11	1.59802e-10	WRKY	KAF3615987.1 putative ubiquitin-conjugating enzyme E2 2-like [Capsicum annuum]	-	-	GO:0003700//DNA-binding transcription factor activity;GO:0043565//sequence-specific DNA binding	GO:0006355//regulation of transcription, DNA-templated
Unigene0022344	WRKY40	0	0	0	13.296	8.027	6.643	0	9.322	13.1864	2.05667e-15	3.19921e-14	WRKY	XP_016582147.1 PREDICTED: WRKY transcription factor 18-like [Capsicum annuum]	-	-	GO:0003700//DNA-binding transcription factor activity;GO:0043565//sequence-specific DNA binding	GO:0006355//regulation of transcription, DNA-templated
Unigene0022345	WRKY18	0	0	0	32.523	33.877	23.768	0	30.056	14.8754	4.53829e-25	1.27682e-23	WRKY	PHT40724.1 hypothetical protein CQW23_19578 [Capsicum baccatum]	-	-	GO:0003700//DNA-binding transcription factor activity;GO:0043565//sequence-specific DNA binding	GO:0006355//regulation of transcription, DNA-templated
Unigene0026122	WRKY48	0	0.085	0	6.33	6.051	1.658	0.0283	4.6797	7.36776	2.2802e-08	2.05224e-07	WRKY	PHU18319.1 putative WRKY transcription factor 23 [Capsicum chinense]	-	-	GO:0003700//DNA-binding transcription factor activity;GO:0043565//sequence-specific DNA binding	GO:0006355//regulation of transcription, DNA-templated
Unigene0030949	WRKY49	2.894	2.091	4.543	0.084	0.271	0.504	3.176	0.2863	-3.47144	5.88039e-06	4.12509e-05	WRKY	XP_009598015.1 probable WRKY transcription factor 49 [Nicotiana tomentosiformis]	-	GO:0005575//cellular_component;GO:0005622//intracellular anatomical structure;GO:0005634//nucleus;GO:0043226//organelle;GO:0043227//membrane-bounded organelle;GO:0043229//intracellular organelle;GO:0043231//intracellular membrane-bounded organelle	GO:0003674//molecular_function;GO:0003676//nucleic acid binding;GO:0003677//DNA binding;GO:0003700//DNA-binding transcription factor activity;GO:0005488//binding;GO:0043565//sequence-specific DNA binding;GO:0097159//organic cyclic compound binding;GO:0140110//transcription regulator activity;GO:1901363//heterocyclic compound binding	GO:0006139//nucleobase-containing compound metabolic process;GO:0006351//transcription, DNA-templated;GO:0006355//regulation of transcription, DNA-templated;GO:0006725//cellular aromatic compound metabolic process;GO:0006807//nitrogen compound metabolic process;GO:0008150//biological_process;GO:0008152//metabolic process;GO:0009058//biosynthetic process;GO:0009059//macromolecule biosynthetic proc…
Unigene0032186	WRKY50	0.449	0	0.227	27.633	14.731	20.428	0.2253	20.9307	6.53741	8.38536e-28	2.7073e-26	WRKY	XP_016549695.1 PREDICTED: probable WRKY transcription factor 50 isoform X2 [Capsicum annuum]	-	GO:0005575//cellular_component;GO:0005622//intracellular anatomical structure;GO:0005634//nucleus;GO:0005739//mitochondrion;GO:0043226//organelle;GO:0043227//membrane-bounded organelle;GO:0043229//intracellular organelle;GO:0043231//intracellular membrane-bounded organelle	GO:0003674//molecular_function;GO:0003676//nucleic acid binding;GO:0003677//DNA binding;GO:0003700//DNA-binding transcription factor activity;GO:0005488//binding;GO:0043565//sequence-specific DNA binding;GO:0097159//organic cyclic compound binding;GO:0140110//transcription regulator activity;GO:1901363//heterocyclic compound binding	GO:0001101//response to acid chemical;GO:0006139//nucleobase-containing compound metabolic process;GO:0006351//transcription, DNA-templated;GO:0006355//regulation of transcription, DNA-templated;GO:0006725//cellular aromatic compound metabolic process;GO:0006807//nitrogen compound metabolic process;GO:0006950//response to stress;GO:0006952//defense response;GO:0007154//cell communication;GO:00071…
Unigene0033269	WRKY41	0	0.063	0	10.416	7.214	7.999	0.021	8.543	8.66821	1.14313e-12	1.47359e-11	WRKY	XP_006350583.1 PREDICTED: probable WRKY transcription factor 30 [Solanum tuberosum]	-	GO:0005575//cellular_component;GO:0005622//intracellular anatomical structure;GO:0005634//nucleus;GO:0005737//cytoplasm;GO:0009507//chloroplast;GO:0009536//plastid;GO:0043226//organelle;GO:0043227//membrane-bounded organelle;GO:0043229//intracellular organelle;GO:0043231//intracellular membrane-bounded organelle	GO:0001067//transcription regulatory region nucleic acid binding;GO:0003674//molecular_function;GO:0003676//nucleic acid binding;GO:0003677//DNA binding;GO:0003700//DNA-binding transcription factor activity;GO:0005488//binding;GO:0043565//sequence-specific DNA binding;GO:0097159//organic cyclic compound binding;GO:0140110//transcription regulator activity;GO:1901363//heterocyclic compound binding	GO:0000302//response to reactive oxygen species;GO:0001101//response to acid chemical;GO:0002376//immune system process;GO:0006139//nucleobase-containing compound metabolic process;GO:0006351//transcription, DNA-templated;GO:0006355//regulation of transcription, DNA-templated;GO:0006725//cellular aromatic compound metabolic process;GO:0006807//nitrogen compound metabolic process;GO:0006950//respo…
Unigene0038190	WRKY45	0	0	0	12.275	12.289	8.561	0	11.0417	13.4307	5.31856e-14	7.48832e-13	WRKY	XP_009630533.1 probable WRKY transcription factor 43 [Nicotiana tomentosiformis]	-	GO:0005575//cellular_component;GO:0005622//intracellular anatomical structure;GO:0005634//nucleus;GO:0043226//organelle;GO:0043227//membrane-bounded organelle;GO:0043229//intracellular organelle;GO:0043231//intracellular membrane-bounded organelle	GO:0000976//transcription cis-regulatory region binding;GO:0000977//RNA polymerase II transcription regulatory region sequence-specific DNA binding;GO:0000978//RNA polymerase II cis-regulatory region sequence-specific DNA binding;GO:0000987//cis-regulatory region sequence-specific DNA binding;GO:0001067//transcription regulatory region nucleic acid binding;GO:0003674//molecular_function;GO:000367…	GO:0000122//negative regulation of transcription by RNA polymerase II;GO:0006139//nucleobase-containing compound metabolic process;GO:0006351//transcription, DNA-templated;GO:0006355//regulation of transcription, DNA-templated;GO:0006357//regulation of transcription by RNA polymerase II;GO:0006725//cellular aromatic compound metabolic process;GO:0006807//nitrogen compound metabolic process;GO:000…
Unigene0039337	WRKY70	0.182	0.225	0.306	48.469	46.74	44.778	0.2377	46.6623	7.61718	1.24414e-86	3.08218e-84	WRKY	XP_009586653.1 WRKY DNA-binding transcription factor 70-like [Nicotiana tomentosiformis]	-	-	GO:0003700//DNA-binding transcription factor activity;GO:0043565//sequence-specific DNA binding	GO:0006355//regulation of transcription, DNA-templated
Unigene0039644	WRKY50	0	0.109	0.046	28.612	21.681	16.428	0.0517	22.2403	8.74973	5.30366e-24	1.39419e-22	WRKY	PHT29220.1 putative WRKY transcription factor 13 [Capsicum baccatum]	-	-	GO:0003700//DNA-binding transcription factor activity;GO:0043565//sequence-specific DNA binding	GO:0006355//regulation of transcription, DNA-templated
Unigene0041971	WRKY24	3.142	2.015	3.276	65.79	41.096	41.697	2.811	49.5277	4.13908	1.44128e-65	1.96496e-63	WRKY	PHU06953.1 putative WRKY transcription factor 26 [Capsicum chinense]	ko04626//Plant-pathogen interaction;ko04016//MAPK signaling pathway - plant	-	GO:0003700//DNA-binding transcription factor activity;GO:0043565//sequence-specific DNA binding	GO:0006355//regulation of transcription, DNA-templated
Unigene0047309	WRKY72A	0	0.054	0.184	9.154	10.087	8.08	0.0793	9.107	6.8429	1.3055e-21	2.98665e-20	WRKY	PHU25511.1 hypothetical protein BC332_03843 [Capsicum chinense]	-	-	GO:0003700//DNA-binding transcription factor activity;GO:0043565//sequence-specific DNA binding	GO:0006355//regulation of transcription, DNA-templated
Unigene0061613	WRKY75	0	0	0	59.426	64.339	51.755	0	58.5067	15.8363	9.92034e-29	3.34361e-27	WRKY	PHU02980.1 putative WRKY transcription factor 24 [Capsicum chinense]	-	-	GO:0003700//DNA-binding transcription factor activity;GO:0016651//oxidoreductase activity, acting on NAD(P)H;GO:0043565//sequence-specific DNA binding;GO:0048038//quinone binding;GO:0051287//NAD binding	GO:0006355//regulation of transcription, DNA-templated
Unigene0066868	WRKY6	0.73	1.718	1.23	143.502	120.497	105.649	1.226	123.216	6.65109	1.00081e-155	1.17999e-152	WRKY	KAG5622928.1 hypothetical protein H5410_008146 [Solanum commersonii]	-	GO:0000795//synaptonemal complex;GO:0005575//cellular_component;GO:0005622//intracellular anatomical structure;GO:0005634//nucleus;GO:0043226//organelle;GO:0043227//membrane-bounded organelle;GO:0043229//intracellular organelle;GO:0043231//intracellular membrane-bounded organelle	GO:0001067//transcription regulatory region nucleic acid binding;GO:0003674//molecular_function;GO:0003676//nucleic acid binding;GO:0003677//DNA binding;GO:0003700//DNA-binding transcription factor activity;GO:0005488//binding;GO:0043565//sequence-specific DNA binding;GO:0097159//organic cyclic compound binding;GO:0140110//transcription regulator activity;GO:1901363//heterocyclic compound binding	GO:0000160//phosphorelay signal transduction system;GO:0006139//nucleobase-containing compound metabolic process;GO:0006351//transcription, DNA-templated;GO:0006355//regulation of transcription, DNA-templated;GO:0006725//cellular aromatic compound metabolic process;GO:0006807//nitrogen compound metabolic process;GO:0006950//response to stress;GO:0007130//synaptonemal complex assembly;GO:0007154//…
Unigene0066907	WRKY29	0.335	0	0.141	4.648	2.803	2.693	0.1587	3.3813	4.41352	5.78146e-08	4.99992e-07	WRKY	XP_019224641.1 PREDICTED: probable WRKY transcription factor 29 [Nicotiana attenuata]	ko04626//Plant-pathogen interaction;ko04016//MAPK signaling pathway - plant	GO:0005575//cellular_component;GO:0005622//intracellular anatomical structure;GO:0005634//nucleus;GO:0043226//organelle;GO:0043227//membrane-bounded organelle;GO:0043229//intracellular organelle;GO:0043231//intracellular membrane-bounded organelle	GO:0003674//molecular_function;GO:0003676//nucleic acid binding;GO:0003677//DNA binding;GO:0003700//DNA-binding transcription factor activity;GO:0005488//binding;GO:0043565//sequence-specific DNA binding;GO:0097159//organic cyclic compound binding;GO:0140110//transcription regulator activity;GO:1901363//heterocyclic compound binding	GO:0006139//nucleobase-containing compound metabolic process;GO:0006351//transcription, DNA-templated;GO:0006355//regulation of transcription, DNA-templated;GO:0006725//cellular aromatic compound metabolic process;GO:0006807//nitrogen compound metabolic process;GO:0006950//response to stress;GO:0006952//defense response;GO:0008150//biological_process;GO:0008152//metabolic process;GO:0009058//bios…
Unigene0070661	WRKY70	0.089	0	0	10.643	9.915	8.207	0.0297	9.5883	8.33629	7.255e-16	1.16733e-14	WRKY	XP_009793213.1 PREDICTED: probable WRKY transcription factor 70 [Nicotiana sylvestris]	-	-	GO:0003700//DNA-binding transcription factor activity;GO:0043565//sequence-specific DNA binding	GO:0006355//regulation of transcription, DNA-templated
Unigene0071595	WRKY40	1.8	0.594	1.168	25.5	16.3	20.616	1.1873	20.8053	4.13116	3.11108e-40	1.75599e-38	WRKY	KAF3622894.1 hypothetical protein FXO38_31050 [Capsicum annuum]	-	-	GO:0003700//DNA-binding transcription factor activity;GO:0043565//sequence-specific DNA binding	GO:0006355//regulation of transcription, DNA-templated
Unigene0071596	WRKY40	0	0	0	0.539	1.982	1.191	0	1.2373	10.273	9.88747e-05	0.000587673	WRKY	KAH0705687.1 hypothetical protein KY289_010763 [Solanum tuberosum]	-	-	GO:0003700//DNA-binding transcription factor activity;GO:0043565//sequence-specific DNA binding	GO:0006355//regulation of transcription, DNA-templated;GO:0070072//vacuolar proton-transporting V-type ATPase complex assembly
Unigene0077490	WRKY71	0	0	0.085	1.504	2.207	0.755	0.0283	1.4887	5.71538	0.000225523	0.00126921	WRKY	KAG5597408.1 hypothetical protein H5410_038640 [Solanum commersonii]	-	-	GO:0003700//DNA-binding transcription factor activity;GO:0043565//sequence-specific DNA binding	GO:0006355//regulation of transcription, DNA-templated
Unigene0078593	WRKY71	0.148	0.438	0.435	8.673	8.014	13.303	0.3403	9.9967	4.87643	9.07917e-22	2.09515e-20	WRKY	PHT55744.1 putative WRKY transcription factor 71 [Capsicum baccatum]	-	GO:0005575//cellular_component;GO:0005622//intracellular anatomical structure;GO:0005634//nucleus;GO:0043226//organelle;GO:0043227//membrane-bounded organelle;GO:0043229//intracellular organelle;GO:0043231//intracellular membrane-bounded organelle	GO:0003674//molecular_function;GO:0003676//nucleic acid binding;GO:0003677//DNA binding;GO:0003700//DNA-binding transcription factor activity;GO:0005488//binding;GO:0043565//sequence-specific DNA binding;GO:0097159//organic cyclic compound binding;GO:0140110//transcription regulator activity;GO:1901363//heterocyclic compound binding	GO:0006139//nucleobase-containing compound metabolic process;GO:0006351//transcription, DNA-templated;GO:0006355//regulation of transcription, DNA-templated;GO:0006725//cellular aromatic compound metabolic process;GO:0006807//nitrogen compound metabolic process;GO:0008150//biological_process;GO:0008152//metabolic process;GO:0009058//biosynthetic process;GO:0009059//macromolecule biosynthetic proc…
Unigene0078996	WRKY15	11.22	6.324	7.168	114.393	122.288	106.791	8.2373	114.491	3.79691	9.03473e-74	1.53803e-71	WRKY	PHT55134.1 hypothetical protein CQW23_03620 [Capsicum baccatum]	-	-	GO:0003700//DNA-binding transcription factor activity;GO:0043565//sequence-specific DNA binding	GO:0006355//regulation of transcription, DNA-templated
Unigene0079723	WRKY11	1.875	1.503	0.451	12.505	9.805	9.779	1.2763	10.6963	3.06704	5.51242e-12	6.76624e-11	WRKY	XP_009772378.1 PREDICTED: probable WRKY transcription factor 11 [Nicotiana sylvestris]	-	-	GO:0003700//DNA-binding transcription factor activity;GO:0043565//sequence-specific DNA binding	GO:0006355//regulation of transcription, DNA-templated

## Sheet: MYB
id	Symbol	Lr-CK-1_fpkm	Lr-CK-2_fpkm	Lr-CK-3_fpkm	Lr-UV-B-1_fpkm	Lr-UV-B-2_fpkm	Lr-UV-B-3_fpkm	A	B	A-vs-B-log2fc	A-vs-B-pvalue	A-vs-B-fdr	TF_family	Description	Pathway	GO Component	GO Function	GO Process
Unigene0003281	MYB106	10.923	10.967	11.676	0.38	0.059	0.055	11.1887	0.1647	-6.08635	1.51731e-26	4.60678e-25	MYB	XP_016561384.1 PREDICTED: myb-related protein Hv1-like [Capsicum annuum]	-	-	-	-
Unigene0011091	MYB4	0	0.135	0	15.157	17.57	8.782	0.045	13.8363	8.26432	4.08026e-15	6.21636e-14	MYB	PHT48848.1 Myb-related protein Zm1 [Capsicum baccatum]	-	GO:0005575//cellular_component;GO:0005622//intracellular anatomical structure;GO:0005634//nucleus;GO:0043226//organelle;GO:0043227//membrane-bounded organelle;GO:0043229//intracellular organelle;GO:0043231//intracellular membrane-bounded organelle	GO:0000981//DNA-binding transcription factor activity, RNA polymerase II-specific;GO:0001067//transcription regulatory region nucleic acid binding;GO:0003674//molecular_function;GO:0003676//nucleic acid binding;GO:0003677//DNA binding;GO:0003700//DNA-binding transcription factor activity;GO:0005488//binding;GO:0005524//ATP binding;GO:0016818//hydrolase activity, acting on acid anhydrides, in phos…	GO:0006139//nucleobase-containing compound metabolic process;GO:0006338//chromatin remodeling;GO:0006351//transcription, DNA-templated;GO:0006355//regulation of transcription, DNA-templated;GO:0006357//regulation of transcription by RNA polymerase II;GO:0006725//cellular aromatic compound metabolic process;GO:0006807//nitrogen compound metabolic process;GO:0006950//response to stress;GO:0008150//…
Unigene0020207	MYB36	4.552	2.868	5.226	0.177	0.383	0.178	4.2153	0.246	-4.09892	2.17813e-08	1.96789e-07	MYB	XP_016542794.1 PREDICTED: transcription factor RAX2 [Capsicum annuum]	-	-	-	-
Unigene0025013	MYB15	0	0	0.116	18.888	15.317	13.412	0.0387	15.8723	8.68121	4.46931e-16	7.28313e-15	MYB	PHT78581.1 Protein ODORANT1 [Capsicum annuum]	-	GO:0016591//RNA polymerase II, holoenzyme	-	-
Unigene0029845	MYB60	2.863	2.785	2.41	0	0	0	2.686	0	-11.3912	5.71225e-10	5.95331e-09	MYB	KAH0721160.1 hypothetical protein KY284_006190 [Solanum tuberosum]	-	GO:0005575//cellular_component;GO:0005622//intracellular anatomical structure;GO:0005634//nucleus;GO:0043226//organelle;GO:0043227//membrane-bounded organelle;GO:0043229//intracellular organelle;GO:0043231//intracellular membrane-bounded organelle	GO:0003674//molecular_function;GO:0003676//nucleic acid binding;GO:0003677//DNA binding;GO:0005488//binding;GO:0097159//organic cyclic compound binding;GO:1901363//heterocyclic compound binding	GO:0006139//nucleobase-containing compound metabolic process;GO:0006351//transcription, DNA-templated;GO:0006355//regulation of transcription, DNA-templated;GO:0006725//cellular aromatic compound metabolic process;GO:0006807//nitrogen compound metabolic process;GO:0008150//biological_process;GO:0008152//metabolic process;GO:0009058//biosynthetic process;GO:0009059//macromolecule biosynthetic proc…
Unigene0032354	MYB73	2.593	2.567	1.325	0.099	0	0	2.1617	0.033	-6.03353	3.56101e-05	0.000225819	MYB	XP_009587267.2 transcription factor MYB73-like [Nicotiana tomentosiformis]	-	GO:0005634//nucleus	GO:0003676//nucleic acid binding;GO:0005524//ATP binding;GO:0016818//hydrolase activity, acting on acid anhydrides, in phosphorus-containing anhydrides	GO:0006338//chromatin remodeling
Unigene0032727	MYB102	0.752	2.022	2.624	0.115	0	0	1.7993	0.0383	-5.55272	0.000393088	0.00212472	MYB_related	KAH0722120.1 hypothetical protein KY289_005164 [Solanum tuberosum]	-	-	-	-
Unigene0034902	MYB48	0.89	1.872	4.401	0.832	0.643	0.478	2.3877	0.651	-1.87487	0.00763011	0.0321803	MYB_related	KAG5598708.1 hypothetical protein H5410_030078 [Solanum commersonii]	-	-	-	-
Unigene0034903	MYB48	28.465	24.85	41.974	8.925	4.825	5.704	31.763	6.4847	-2.29224	2.21816e-16	3.67871e-15	MYB_related	XP_016444319.1 PREDICTED: transcription factor MYB48-like [Nicotiana tabacum]	-	-	-	-
Unigene0042723	MYB3R1	1.026	0.703	0.631	3.838	3.785	4.024	0.7867	3.8823	2.3031	3.14107e-10	3.36223e-09	MYB	XP_006358883.1 PREDICTED: transcription factor MYB28-like [Solanum tuberosum]	-	GO:0005575//cellular_component;GO:0005622//intracellular anatomical structure;GO:0005634//nucleus;GO:0043226//organelle;GO:0043227//membrane-bounded organelle;GO:0043229//intracellular organelle;GO:0043231//intracellular membrane-bounded organelle	GO:0000981//DNA-binding transcription factor activity, RNA polymerase II-specific;GO:0001067//transcription regulatory region nucleic acid binding;GO:0003674//molecular_function;GO:0003676//nucleic acid binding;GO:0003677//DNA binding;GO:0003700//DNA-binding transcription factor activity;GO:0005488//binding;GO:0005524//ATP binding;GO:0016818//hydrolase activity, acting on acid anhydrides, in phos…	GO:0006139//nucleobase-containing compound metabolic process;GO:0006338//chromatin remodeling;GO:0006351//transcription, DNA-templated;GO:0006355//regulation of transcription, DNA-templated;GO:0006357//regulation of transcription by RNA polymerase II;GO:0006725//cellular aromatic compound metabolic process;GO:0006807//nitrogen compound metabolic process;GO:0008150//biological_process;GO:0008152//…
Unigene0047706	MYB1	2.719	2.992	3.052	33.425	31.164	30.649	2.921	31.746	3.44204	5.46828e-51	4.67322e-49	MYB	QPZ86335.1 AN2-like protein [Lycium ruthenicum]	-	-	GO:0008270//zinc ion binding	-
Unigene0048858	MYB306	11.06	10.236	12.913	0.653	1.285	0.477	11.403	0.805	-3.82428	1.00653e-23	2.60398e-22	MYB	XP_009602669.1 myb-related protein 306-like [Nicotiana tomentosiformis]	-	-	-	-
Unigene0050522	MYB13	1.861	3.2	1.237	0.628	0.34	0.105	2.0993	0.3577	-2.55324	0.00536545	0.0234653	MYB	XP_019234692.1 PREDICTED: myb-related protein Myb4-like [Nicotiana attenuata]	-	-	-	-
Unigene0052385	MYB306	10.955	9.092	12.58	4.67	4.537	2.787	10.8757	3.998	-1.44375	6.96351e-06	4.84432e-05	MYB	KAH0762789.1 hypothetical protein KY290_018862 [Solanum tuberosum]	-	-	-	-
Unigene0053001	MYB330	20.699	17.777	19.143	6.924	8.462	11.412	19.2063	8.9327	-1.10442	5.30331e-05	0.000328678	MYB	XP_016485029.1 PREDICTED: myb-related protein 330-like [Nicotiana tabacum]	-	GO:0005634//nucleus	GO:0003676//nucleic acid binding;GO:0005524//ATP binding;GO:0016818//hydrolase activity, acting on acid anhydrides, in phosphorus-containing anhydrides	GO:0006338//chromatin remodeling
Unigene0053002	MYB308	35.991	16.403	25.439	11.161	8.702	11.963	25.9443	10.6087	-1.29018	1.86773e-05	0.000123062	MYB_related	PHT97629.1 Transcription repressor MYB4 [Capsicum chinense]	-	GO:0005634//nucleus	GO:0003676//nucleic acid binding;GO:0005524//ATP binding;GO:0016818//hydrolase activity, acting on acid anhydrides, in phosphorus-containing anhydrides	GO:0006338//chromatin remodeling
Unigene0058436	MYB5	0.574	0.852	1.046	0	0	0	0.824	0	-9.6865	0.00198227	0.00948094	--	KAG5589476.1 hypothetical protein H5410_039990 [Solanum commersonii]	-	GO:0030176//integral component of endoplasmic reticulum membrane	-	GO:0015031//protein transport
Unigene0069831	MYB94	10.78	10.584	11.18	0.729	0.053	0.342	10.848	0.3747	-4.85568	2.28779e-27	7.24311e-26	MYB_related	XP_009618496.1 myb-related protein 306-like [Nicotiana tomentosiformis]	-	-	-	-
Unigene0070868	MYBS3	72.734	55.025	59.423	11.849	8.472	11.247	62.394	10.5227	-2.56791	2.26768e-36	1.08556e-34	MYB_related	KAH0708798.1 hypothetical protein KY284_010225 [Solanum tuberosum]	-	GO:0005575//cellular_component;GO:0005622//intracellular anatomical structure;GO:0005634//nucleus;GO:0005737//cytoplasm;GO:0005829//cytosol;GO:0043226//organelle;GO:0043227//membrane-bounded organelle;GO:0043229//intracellular organelle;GO:0043231//intracellular membrane-bounded organelle	GO:0003674//molecular_function;GO:0003676//nucleic acid binding;GO:0003677//DNA binding;GO:0005488//binding;GO:0097159//organic cyclic compound binding;GO:1901363//heterocyclic compound binding	GO:0006139//nucleobase-containing compound metabolic process;GO:0006351//transcription, DNA-templated;GO:0006355//regulation of transcription, DNA-templated;GO:0006725//cellular aromatic compound metabolic process;GO:0006807//nitrogen compound metabolic process;GO:0008150//biological_process;GO:0008152//metabolic process;GO:0009058//biosynthetic process;GO:0009059//macromolecule biosynthetic proc…
Unigene0072127	MYB48	23.826	22.888	29.187	1.473	1.849	1.193	25.3003	1.505	-4.07132	7.52282e-58	8.1595e-56	--	XP_009798979.1 PREDICTED: transcription factor MYB48-like [Nicotiana sylvestris]	-	-	-	-
Unigene0075060	MYBC1	31.057	27.153	31.139	11.828	11.058	15.149	29.783	12.6783	-1.23212	6.98546e-09	6.62126e-08	G2-like	PHU06233.1 Two-component response regulator ARR1 [Capsicum chinense]	-	-	-	-
Unigene0077432	MYB306	10.061	8.377	8.566	0.489	0.727	1.473	9.0013	0.8963	-3.32803	1.34158e-15	2.1153e-14	MYB	XP_009765566.1 PREDICTED: myb-related protein 306-like [Nicotiana sylvestris]	-	-	-	-
Unigene0079064	MYB3	11.178	4.175	9.575	3.249	2.833	3.789	8.3093	3.2903	-1.3365	0.00469339	0.0207657	MYB	KAG5603985.1 hypothetical protein H5410_025477 [Solanum commersonii]	-	GO:0005575//cellular_component;GO:0005622//intracellular anatomical structure;GO:0005634//nucleus;GO:0043226//organelle;GO:0043227//membrane-bounded organelle;GO:0043229//intracellular organelle;GO:0043231//intracellular membrane-bounded organelle	GO:0000981//DNA-binding transcription factor activity, RNA polymerase II-specific;GO:0001067//transcription regulatory region nucleic acid binding;GO:0003674//molecular_function;GO:0003676//nucleic acid binding;GO:0003677//DNA binding;GO:0003700//DNA-binding transcription factor activity;GO:0005488//binding;GO:0043565//sequence-specific DNA binding;GO:0097159//organic cyclic compound binding;GO:0…	GO:0001101//response to acid chemical;GO:0006082//organic acid metabolic process;GO:0006139//nucleobase-containing compound metabolic process;GO:0006351//transcription, DNA-templated;GO:0006355//regulation of transcription, DNA-templated;GO:0006357//regulation of transcription by RNA polymerase II;GO:0006725//cellular aromatic compound metabolic process;GO:0006807//nitrogen compound metabolic pro…

## Sheet: bHLH
id	Symbol	Lr-CK-1_fpkm	Lr-CK-2_fpkm	Lr-CK-3_fpkm	Lr-UV-B-1_fpkm	Lr-UV-B-2_fpkm	Lr-UV-B-3_fpkm	A	B	A-vs-B-log2fc	A-vs-B-pvalue	A-vs-B-fdr	TF_family	Description	Pathway	GO Component	GO Function	GO Process
Unigene0000548	BHLH147	2.877	4.144	3.817	0	0.907	0.187	3.6127	0.3647	-3.30841	4.06719e-05	0.00025593	--	PHT48678.1 Transcription factor [Capsicum baccatum]	-	-	-	-
Unigene0014085	BHLH42	0.44	0.622	0.74	1.142	2.178	3.676	0.6007	2.332	1.95693	4.27575e-05	0.000268179	bHLH	XP_016542130.1 PREDICTED: basic helix-loop-helix protein A isoform X2 [Capsicum annuum]	-	-	GO:0046983//protein dimerization activity	-
Unigene0020144	BHLH36	3.905	3.13	3.235	0.199	0.501	0.466	3.4233	0.3887	-3.1388	1.22112e-07	1.02123e-06	bHLH	XP_015081892.1 transcription factor bHLH120-like [Solanum pennellii]	-	GO:0042729//DASH complex;GO:0072686//mitotic spindle	GO:0046983//protein dimerization activity	GO:0008608//attachment of spindle microtubules to kinetochore
Unigene0025729	BHLH63	69.462	52.362	44.516	2.063	1.195	2.405	55.4467	1.8877	-4.87642	1.90136e-71	3.09605e-69	bHLH	KAF3657107.1 Transcription factor bHLH49 [Capsicum annuum]	-	GO:0005575//cellular_component;GO:0005622//intracellular anatomical structure;GO:0005634//nucleus;GO:0043226//organelle;GO:0043227//membrane-bounded organelle;GO:0043229//intracellular organelle;GO:0043231//intracellular membrane-bounded organelle	GO:0003674//molecular_function;GO:0003676//nucleic acid binding;GO:0003677//DNA binding;GO:0003700//DNA-binding transcription factor activity;GO:0005488//binding;GO:0005515//protein binding;GO:0008168//methyltransferase activity;GO:0046983//protein dimerization activity;GO:0097159//organic cyclic compound binding;GO:0140110//transcription regulator activity;GO:1901363//heterocyclic compound bindi…	GO:0000003//reproduction;GO:0003006//developmental process involved in reproduction;GO:0006139//nucleobase-containing compound metabolic process;GO:0006351//transcription, DNA-templated;GO:0006355//regulation of transcription, DNA-templated;GO:0006364//rRNA processing;GO:0006725//cellular aromatic compound metabolic process;GO:0006807//nitrogen compound metabolic process;GO:0007275//multicellular…
Unigene0027765	BHLH14	1.514	1.326	3.284	0.498	0	0.125	2.0413	0.2077	-3.29717	0.000246402	0.00137649	bHLH	XP_004230021.1 transcription factor MYC2-like isoform X1 [Solanum lycopersicum]	-	-	GO:0046983//protein dimerization activity	GO:0009058//biosynthetic process
Unigene0029186	BHLH60	4.411	4.345	4.316	0.311	0.207	0.433	4.3573	0.317	-3.78089	4.10274e-24	1.08522e-22	bHLH	KAH0752687.1 hypothetical protein KY285_005835 [Solanum tuberosum]	-	-	GO:0046983//protein dimerization activity	-
Unigene0036692	BHLH94	68.284	48.746	46.722	1.117	0.22	0.459	54.584	0.5987	-6.51058	7.03635e-27	2.17788e-25	bHLH	PHT58349.1 Transcription factor bHLH96 [Capsicum baccatum]	-	GO:0005575//cellular_component;GO:0005622//intracellular anatomical structure;GO:0005634//nucleus;GO:0043226//organelle;GO:0043227//membrane-bounded organelle;GO:0043229//intracellular organelle;GO:0043231//intracellular membrane-bounded organelle	GO:0003674//molecular_function;GO:0003676//nucleic acid binding;GO:0003677//DNA binding;GO:0003700//DNA-binding transcription factor activity;GO:0005488//binding;GO:0005515//protein binding;GO:0046983//protein dimerization activity;GO:0097159//organic cyclic compound binding;GO:0140110//transcription regulator activity;GO:1901363//heterocyclic compound binding	GO:0006139//nucleobase-containing compound metabolic process;GO:0006351//transcription, DNA-templated;GO:0006355//regulation of transcription, DNA-templated;GO:0006725//cellular aromatic compound metabolic process;GO:0006807//nitrogen compound metabolic process;GO:0007275//multicellular organism development;GO:0008150//biological_process;GO:0008152//metabolic process;GO:0009058//biosynthetic proc…
Unigene0037632	BHLH93	12.122	10.111	9.04	1.197	0.533	0.566	10.4243	0.7653	-3.76772	1.84448e-18	3.47028e-17	bHLH	XP_016571505.1 PREDICTED: transcription factor bHLH93-like [Capsicum annuum]	-	-	GO:0046983//protein dimerization activity	-
Unigene0042558	GL3	6.303	6.989	9.404	3.046	2.246	2.937	7.5653	2.743	-1.46365	3.79313e-09	3.68198e-08	bHLH	NP_001333930.1 bHLH-type transcription factor JAF13 [Solanum lycopersicum]	-	-	GO:0008270//zinc ion binding;GO:0046983//protein dimerization activity	-
Unigene0046965	BHLH41	0	0	0	8.522	5.412	8.355	0	7.4297	12.8591	1.59311e-14	2.32638e-13	bHLH	KAG5569599.1 hypothetical protein H5410_059365 [Solanum commersonii]	-	-	GO:0016491//oxidoreductase activity;GO:0019139//cytokinin dehydrogenase activity;GO:0046983//protein dimerization activity;GO:0050660//flavin adenine dinucleotide binding	GO:0009690//cytokinin metabolic process
Unigene0050557	BHLH92	0	0	0	4.155	2.793	2.03	0	2.9927	11.5472	5.33934e-08	4.63267e-07	bHLH	XP_016462348.1 PREDICTED: transcription factor bHLH92-like [Nicotiana tabacum]	-	GO:0005575//cellular_component;GO:0005622//intracellular anatomical structure;GO:0005634//nucleus;GO:0043226//organelle;GO:0043227//membrane-bounded organelle;GO:0043229//intracellular organelle;GO:0043231//intracellular membrane-bounded organelle	GO:0003674//molecular_function;GO:0003676//nucleic acid binding;GO:0003677//DNA binding;GO:0003700//DNA-binding transcription factor activity;GO:0005488//binding;GO:0005515//protein binding;GO:0046983//protein dimerization activity;GO:0097159//organic cyclic compound binding;GO:0140110//transcription regulator activity;GO:1901363//heterocyclic compound binding	GO:0001101//response to acid chemical;GO:0006139//nucleobase-containing compound metabolic process;GO:0006351//transcription, DNA-templated;GO:0006355//regulation of transcription, DNA-templated;GO:0006725//cellular aromatic compound metabolic process;GO:0006807//nitrogen compound metabolic process;GO:0006950//response to stress;GO:0008150//biological_process;GO:0008152//metabolic process;GO:0009…
Unigene0052394	BHLH111	0	0	0.059	0.974	1.62	1.73	0.0197	1.4413	6.19551	1.9751e-05	0.000129653	--	XP_016537422.1 PREDICTED: transcription factor bHLH111 [Capsicum annuum]	-	-	-	-
Unigene0055694	BHLH137	28.937	18.249	23.096	1.605	0.096	0.537	23.4273	0.746	-4.97287	1.45305e-08	1.334e-07	--	KAH0702832.1 hypothetical protein KY285_017110 [Solanum tuberosum]	-	-	GO:0046983//protein dimerization activity	-
Unigene0069227	BHLH162	0	0	0	11.547	13.883	20.131	0	15.187	13.8905	1.93199e-16	3.21585e-15	--	KAF3674931.1 putative late blight resistance protein -like protein R1B-12-like [Capsicum annuum]	-	-	GO:0046983//protein dimerization activity	-
Unigene0069581	BHLH41	0.034	0	0	27.259	19.925	16.381	0.0113	21.1883	10.8685	9.95766e-20	2.03461e-18	bHLH	PHT76237.1 hypothetical protein T459_19759 [Capsicum annuum]	-	GO:0005575//cellular_component;GO:0005622//intracellular anatomical structure;GO:0005634//nucleus;GO:0043226//organelle;GO:0043227//membrane-bounded organelle;GO:0043229//intracellular organelle;GO:0043231//intracellular membrane-bounded organelle	GO:0003674//molecular_function;GO:0003676//nucleic acid binding;GO:0003677//DNA binding;GO:0003700//DNA-binding transcription factor activity;GO:0005488//binding;GO:0005515//protein binding;GO:0046983//protein dimerization activity;GO:0097159//organic cyclic compound binding;GO:0140110//transcription regulator activity;GO:1901363//heterocyclic compound binding	GO:0006139//nucleobase-containing compound metabolic process;GO:0006351//transcription, DNA-templated;GO:0006355//regulation of transcription, DNA-templated;GO:0006725//cellular aromatic compound metabolic process;GO:0006807//nitrogen compound metabolic process;GO:0008150//biological_process;GO:0008152//metabolic process;GO:0009058//biosynthetic process;GO:0009059//macromolecule biosynthetic proc…
