# Supplementary material for: UV-B irradiation promotes anthocyanin biosynthesis in the leaves of Lycium ruthenicum Murray
Source: PeerJ. 2024 Oct 14;12:e18199. doi: 10.7717/peerj.18199 (PMC11485054; doi:10.7717/peerj.18199)
Supplement: Supplemental Information 8 [file peerj-12-18199-s008.xls]

## Sheet: Sheet1
ITEM TO CHECK	IMPORTANCE	CHECKLIST
EXPERIMENTAL DESIGN
Definition of experimental and control groups	E	✓, page:3,line number:92-94
Number within each group	E	✓, page:3,line number:89-92
Assay carried out by core lab or investigator's lab?	D	NOT applicable
Acknowledgement of authors' contributions	D	✓, page:8,line number:286
SAMPLE
Description	E	✓, page:3,line number:85-94
Volume/mass of sample processed	D	The collected leaves were cut into pieces with scissors, mixed and divided into 0.1g
Microdissection or macrodissection	E	NOT applicable
Processing procedure	E	The samples were cut with 75% alcohol-wiped scissors and weighed to an accuracy of 0.1g. They were wrapped in tin foil
If frozen - how and how quickly?	E	they were frozen rapidly in liquid nitrogen for a period of two hours.
If fixed - with what, how quickly?	E	NOT applicable
Sample storage conditions and duration (especially for FFPE samples)	E	The samples were stored at-80 °C for 3 months.
NUCLEIC ACID EXTRACTION
Procedure and/or instrumentation	E	Follow the steps in the kit. Instrumentation:Manual
Name of kit and details of any modifications	E	✓, page:4,line number:118-119 and Not modifications
Source of additional reagents used	D	No additional reagents were used
Details of DNase or RNAse treatment	E	1. Extract RNA on a clean workbench. 2. Use DNase- and RNase-free pipette tips and centrifuge tubes. 3. All instruments used to extract RNA must be sterilized using an autoclave.
Contamination assessment (DNA or RNA)	E	The purity of RNA is determined by measuring the OD value of the sample. Samples with an OD260/280 between 1.9 and 2.1 have the best purity. When the OD value is less than 1.9, it means there is protein residue. When the OD value is greater than 2.1, it means the RNA may be degraded.
Nucleic acid quantification	E	SM:Table1, page:1,line number:2
Instrument and method	E	thermo Nandrop2000, ultraviolet absorption
Purity (A260/A280)	D	SM:Table1, page:1,line number:2
Yield	D	All RNA yield in the range of 300-500 ng / μl
RNA integrity method/instrument	E	Method：Agarose gel electrophoresis pattern.Instrument:DYY-7C Electrophoresis
RIN/RQI or Cq of 3' and 5' transcripts	E	Information is not available
Electrophoresis traces	D	SM:Figure 1: Agarose gel electrophoresis pattern (1.5% agarose, 180V, 15 min)
Inhibition testing (Cq dilutions, spike or other)	E	Information is not available
REVERSE TRANSCRIPTION
Complete reaction conditions	E	Reactions were prepared on ice
Amount of RNA and reaction volume	E	In 20μl reverse transcription reaction system, 1μg total RNA was used.
Priming oligonucleotide (if using GSP) and concentration	E	Information is not available
Reverse transcriptase and concentration	E	Information is not available
Temperature and time	E	10 min@37℃+5sec@85℃+4℃
Manufacturer of reagents and catalogue numbers	D	Takara,RR092A
Cqs with and without RT	D*	Information is not available
Storage conditions of cDNA	D	Storage condition of cDNA :-20 ℃
qPCR TARGET INFORMATION
If multiplex, efficiency and LOD of each assay.	E	NOT applicable
Sequence accession number	E	SM:Table2, page:1,line number:10
Location of amplicon	D	SM: page:2,line number:12
Amplicon length	E	SM:Table3, page:8,line number:225
In silico specificity screen (BLAST, etc)	E	Information is not available
Pseudogenes, retropseudogenes or other homologs?	D	NOT application
Sequence alignment	D	Information is not available
Secondary structure analysis of amplicon	D	Information is not available
Location of each primer by exon or intron (if applicable)	E	Information is not available
What splice variants are targeted?	E	Information is not available
qPCR OLIGONUCLEOTIDES
Primer sequences	E	SM:Table3, page:8,line number:225
RTPrimerDB Identification Number	D	NOT applicable
Probe sequences	D**	NOT applicable
Location and identity of any modifications	E	NOT applicable
Manufacturer of oligonucleotides	D	Sangon Biotech (Shanghai) Co.,Ltd.
Purification method	D	PAGE
qPCR PROTOCOL
Complete reaction conditions	E	Reactions were prepared on ice
Reaction volume and amount of cDNA/DNA	E	In 20μl reaction system, 100ng cDNA was used.
Primer, (probe), Mg++ and dNTP concentrations	E	Information is not available
Polymerase identity and concentration	E	Information is not available
Buffer/kit identity and manufacturer	E	Takara, RR820A
Exact chemical constitution of the buffer	D	Information is not available
Additives (SYBR Green I, DMSO, etc.)	E	NOT applicable
Manufacturer of plates/tubes and catalog number	D	0.2ml Fluorescence Quantitative PCR Transparent 8-tube GX-PCR-0208C
Complete thermocycling parameters	E	SM:page:9,line number:227
Reaction setup (manual/robotic)	D	Manual
Manufacturer of qPCR instrument	E	Thermo Fisher Scientific
qPCR VALIDATION
Evidence of optimisation (from gradients)	D	Test was performed but evidence ismissing
Specificity (gel, sequence, melt, or digest)	E	SM:page:9,line number:238-317
For SYBR Green I, Cq of the NTC	E	Information is not available
Standard curves with slope and y-intercept	E	NOT applicable
PCR efficiency calculated from slope	E	NOT applicable
Confidence interval for PCR efficiency or standard error	D	NOT applicable
r2 of standard curve	E	NOT applicable
Linear dynamic range	E	NOT applicable
Cq variation at lower limit	E	NOT applicable
Confidence intervals throughout range	D	NOT applicable
Evidence for limit of detection	E	NOT applicable
If multiplex, efficiency and LOD of each assay.	E	NOT applicable
DATA ANALYSIS
qPCR analysis program (source, version)	E	Thermo 7500 Software v2.3
Cq method determination	E	Taking UV treatment as an example, we select three leaf samples under UV treatment conditions for fluorescence quantification and average the Cq values of the reference genes obtained to obtain the Cq value of the reference gene under this condition. Similarly, we can average the Cq values of the target gene in the three samples to obtain the Cq value of the target gene under this treatment condi…
Outlier identification and disposition	E	In this experiment, three biological replicates were set up for each test sample and three technical replicates were set up for one sample. When outliers occurred, our approach was to delete them and retest the anomalous data points.
Results of NTCs	E	Test was performed but evidence ismissing
Justification of number and choice of reference genes	E	Reference genes in the literature（Qi, Yinyan, et al. "Transcriptome profiling provides insights into the fruit color development of wild Lycium ruthenicum Murr. from Qinghai–Tibet Plateau." Protoplasma 258 (2021): 33-43.）
Description of normalisation method	E	NOT applicable
Number and concordance of biological replicates	D	Three
Number and stage (RT or qPCR) of technical replicates	E	Three
Repeatability (intra-assay variation)	E	Information is not available
Reproducibility (inter-assay variation, %CV)	D	Information is not available
Power analysis	D	Information is not available
Statistical methods for result significance	E	One-way ANOVA
Software (source, version)	E	IBM SPSS Statistics 24
Cq or raw data submission using RDML	D	Information is not available
Table 1. MIQE checklist for authors, reviewers and editors. All essential information (E) must be submitted with the manuscript. Desirable
information (D) should be submitted if available. If using primers obtained from RTPrimerDB, information on qPCR target, oligonucleotides,
protocols and validation is available from that source.
*: Assessing the absence of DNA using a no RT assay is essential when first extracting RNA. Once the sample has been validated as
RDNA-free, inclusion of a no-RT control is desirable, but no longer essential.
**: Disclosure of the probe sequence is highly desirable and strongly encouraged. However, since not all commercial pre-designed assay
vendors provide this information, it cannot be an essential requirement. Use of such assays is advised against.
✓:Information is included in the text
SM::Information is provided in Supplementary materials (Supplementary information for the MIQE checklist)
