# Supplementary material for: UV-B irradiation promotes anthocyanin biosynthesis in the leaves of Lycium ruthenicum Murray
Source: PeerJ. 2024 Oct 14;12:e18199. doi: 10.7717/peerj.18199 (PMC11485054; doi:10.7717/peerj.18199)
Supplement: Supplemental Information 10 [file peerj-12-18199-s010.xlsx]

## Sheet: H2O2
H2O2 content
sample	A-treatment	A-CK	△A	weight（g）	H2O2（μmol/g FW）
CK-1	0.2241	0.0442	0.1799	0.1004	4.76824
CK-2	0.2121	0.0442	0.1679	0.1016	4.39656
CK-3	0.2361	0.0442	0.1919	0.1014	5.03719
1 day-1	0.211	0.0442	0.1668	0.1011	4.38926
1 day-2	0.2385	0.0442	0.1943	0.1007	5.13584
1 day-3	0.2266	0.0442	0.1824	0.1016	4.77762
2 day-1	0.2865	0.0442	0.2423	0.1013	6.37057
2 day-2	0.2652	0.0442	0.221	0.1002	5.87293
2 day-3	0.2912	0.0442	0.247	0.1011	6.5073
4 day-1	0.2629	0.0442	0.2187	0.1	5.82327
4 day-2	0.2723	0.0442	0.2281	0.1011	6.00816
4 day-3	0.2677	0.0442	0.2235	0.1015	5.86348

## Sheet: MDA
MDA content
sample	532nm	600nm	△A	weight（g）	MDA(nmol/g FW)
CK-1	0.0657	0.0414	0.0243	0.1006	12.464
CK-2	0.0686	0.0417	0.0269	0.102	13.6082
CK-3	0.0663	0.0418	0.0245	0.1002	12.6168
1 day-1	0.0628	0.0409	0.0219	0.1004	11.2554
1 day-2	0.0607	0.0406	0.0201	0.1003	10.3406
1 day-3	0.0646	0.0417	0.0229	0.102	11.5847
2 day-1	0.0688	0.0426	0.0262	0.1012	13.3589
2 day-2	0.0679	0.0426	0.0253	0.1009	12.9384
2 day-3	0.0668	0.0439	0.0229	0.1006	11.7459
4 day-1	0.0678	0.0424	0.0254	0.1001	13.0933
4 day-2	0.0704	0.0436	0.0268	0.1015	13.6244
4 day-3	0.0698	0.0446	0.0252	0.1013	12.8363

## Sheet: POD
POD
sample	A1	A2	△A	weight（g）	POD（U/g FW)
CK-1	0.3486	0.5798	0.2312	0.1006	919.284
CK-2	0.3369	0.5727	0.2358	0.102	924.706
CK-3	0.4082	0.6676	0.2594	0.1002	1035.53
1 day-1	0.3037	0.5256	0.2219	0.1004	884.064
1 day-2	0.2438	0.4514	0.2076	0.1003	827.916
1 day-3	0.4135	0.6179	0.2044	0.102	801.569
2 day-1	0.3248	0.5672	0.2424	0.1012	958.103
2 day-2	0.2662	0.4938	0.2276	0.1009	902.279
2 day-3	0.2896	0.5026	0.213	0.1006	846.918
4 day-1	0.401	0.7036	0.3026	0.1001	1209.19
4 day-2	0.3387	0.636	0.2973	0.1015	1171.63
4 day-3	0.4488	0.7853	0.3365	0.1013	1328.73

## Sheet: CAT
CAT activity
sample	A1	A2	∆A	weight（g）	CAT(U/g FW)
CK-1	0.4048	0.4038	0.001	0.1006	9.12525
CK-2	0.4048	0.4038	0.001	0.102	9
CK-3	0.4378	0.4367	0.0011	0.1002	10.0778
1 day-1	0.4262	0.425	0.0012	0.1004	10.9721
1 day-2	0.4203	0.4192	0.0011	0.1003	10.0678
1 day-3	0.4354	0.4343	0.0011	0.102	9.9
2 day-1	0.4539	0.4527	0.0012	0.1012	10.8854
2 day-2	0.454	0.4526	0.0014	0.1009	12.7374
2 day-3	0.4723	0.4709	0.0014	0.1006	12.7753
4 day-1	0.4925	0.4896	0.0029	0.1001	26.5954
4 day-2	0.5143	0.5116	0.0027	0.1015	24.4197
4 day-3	0.5818	0.5793	0.0025	0.1013	22.6555

## Sheet: SOD
SOD activity
sample	A-CK	A-treatment	inhibiting percentage	weight（g）	SOD activity（U/g FW）
CK-1	0.6868	0.1796	0.738497	0.1006	561.442
CK-2	0.6868	0.1868	0.728014	0.102	524.835
CK-3	0.6868	0.1735	0.747379	0.1002	590.519
1 day-1	0.6868	0.1789	0.739517	0.1004	565.541
1 day-2	0.6868	0.1853	0.730198	0.1003	539.665
1 day-3	0.6868	0.1683	0.75495	0.102	604.08
2 day-1	0.6868	0.1551	0.77417	0.1012	677.492
2 day-2	0.6868	0.1635	0.761939	0.1009	634.413
2 day-3	0.6868	0.1475	0.785236	0.1006	726.893
4 day-1	0.6868	0.0831	0.879004	0.1001	1451.5
4 day-2	0.6868	0.0796	0.8841	0.1015	1503.08
4 day-3	0.6868	0.0763	0.888905	0.1013	1579.73

## Sheet: Anthocyanin
Anthocyanin content
sample	wave length	A1	A2	A3	average	(A530-0.25*A657)/M
CK-1	530	0.1658	0.166	0.1656	0.1658
CK-1	657	0.0598	0.0597	0.0598	0.0597667	1.37144
CK-2	530	0.3025	0.3037	0.3022	0.3028
CK-2	657	0.0973	0.0975	0.0972	0.0973333	2.53152
CK-3	530	0.2358	0.2358	0.2351	0.235567
CK-3	657	0.1043	0.1041	0.104	0.104133	1.90485
0.5 day-1	530	0.3221	0.3225	0.3213	0.321967
0.5 day-1	657	0.0877	0.0874	0.0873	0.0874667	2.72818
0.5 day-2	530	0.53	0.5277	0.5262	0.527967
0.5 day-2	657	0.1322	0.1317	0.131	0.131633	4.50053
0.5 day-3	530	0.4891	0.488	0.4883	0.488467
0.5 day-3	657	0.1085	0.1082	0.108	0.108233	4.19462
1 day-1	530	0.5594	0.5576	0.5569	0.557967
1 day-1	657	0.1097	0.1089	0.1087	0.1091	4.82447
1 day-2	530	0.6219	0.62	0.6198	0.620567
1 day-2	657	0.1061	0.1054	0.1054	0.105633	5.40144
1 day-3	530	0.6918	0.69	0.6916	0.691133
1 day-3	657	0.0868	0.0863	0.0865	0.0865333	6.08636
2 day-1	530	0.4592	0.4568	0.4576	0.457867
2 day-1	657	0.0612	0.0614	0.0615	0.0613667	4.02295
2 day-2	530	0.4716	0.4705	0.4711	0.471067
2 day-2	657	0.1016	0.1015	0.1015	0.101533	4.05167
2 day-3	530	0.7597	0.7556	0.7587	0.758
2 day-3	657	0.1629	0.1616	0.1625	0.162333	6.52197
4 day-1	530	0.3701	0.3695	0.3703	0.369967
4 day-1	657	0.0671	0.0667	0.0665	0.0667667	3.21159
4 day-2	530	0.5207	0.5179	0.5182	0.518933
4 day-2	657	0.0901	0.0898	0.0894	0.0897667	4.51356
4 day-3	530	0.6442	0.6425	0.6414	0.6427
4 day-3	657	0.0768	0.0767	0.076	0.0765	5.66886
