# Supplementary material for: UV-B irradiation promotes anthocyanin biosynthesis in the leaves of Lycium ruthenicum Murray
Source: PeerJ. 2024 Oct 14;12:e18199. doi: 10.7717/peerj.18199 (PMC11485054; doi:10.7717/peerj.18199)
Supplement: Table S6 [file peerj-12-18199-s006.xlsx]

## Sheet: Table S6
id	Lr-CK-1_fpkm	Lr-CK-2_fpkm	Lr-CK-3_fpkm	Lr-UV-B-1_fpkm	Lr-UV-B-2_fpkm	Lr-UV-B-3_fpkm	Symbol	Description	KEGG_A_class	KEGG_B_class	Pathway	K_ID	GO Component	GO Function	GO Process	TF_family
Unigene0000001	34.223	28.519	35.003	16.764	15.776	15.641	ILL1	XP_009794201.1 PREDICTED: IAA-amino acid hydrolase ILR1-like 4 [Nicotiana sylvestris]	-	-	-	-	-	GO:0004180//carboxypeptidase activity;GO:0004222//metalloendopeptidase activity;GO:0008777//acetylornithine deacetylase activity;GO:0009014//succinyl-diaminopimelate desuccinylase activity;GO:0016787//hydrolase activity	GO:0006508//proteolysis;GO:0006592//ornithine biosynthetic process;GO:0009089//lysine biosynthetic process via diaminopimelate	--
Unigene0000003	0.387	0.384	0.163	0.207	0.672	0	--	-	-	-	-	-	-	-	-	--
Unigene0000004	16.493	17.629	17.195	14.127	10.099	10.611	ILL2	XP_016548414.1 PREDICTED: IAA-amino acid hydrolase ILR1-like 4 [Capsicum annuum]	-	-	-	-	GO:0005575//cellular_component;GO:0005622//intracellular anatomical structure;GO:0005737//cytoplasm;GO:0005783//endoplasmic reticulum;GO:0005788//endoplasmic reticulum lumen;GO:0012505//endomembrane system;GO:0031974//membrane-enclosed lumen;GO:0043226//organelle;GO:0043227//membrane-bounded organelle;GO:0043229//intracellular organelle;GO:0043231//intracellular membrane-bounded organelle;GO:0043…	GO:0003674//molecular_function;GO:0003824//catalytic activity;GO:0004180//carboxypeptidase activity;GO:0004222//metalloendopeptidase activity;GO:0005488//binding;GO:0008777//acetylornithine deacetylase activity;GO:0009014//succinyl-diaminopimelate desuccinylase activity;GO:0010178//IAA-amino acid conjugate hydrolase activity;GO:0010179//IAA-Ala conjugate hydrolase activity;GO:0016787//hydrolase a…	GO:0006508//proteolysis;GO:0006592//ornithine biosynthetic process;GO:0008150//biological_process;GO:0008152//metabolic process;GO:0009089//lysine biosynthetic process via diaminopimelate;GO:0009850//auxin metabolic process;GO:0009987//cellular process;GO:0010817//regulation of hormone levels;GO:0042445//hormone metabolic process;GO:0044237//cellular metabolic process;GO:0065007//biological regul…	--
Unigene0000005	21.45	22.243	24.48	1.141	0.432	1.661	ILL6	XP_009592954.1 IAA-amino acid hydrolase ILR1-like 6 [Nicotiana tomentosiformis]	-	-	-	-	-	GO:0003674//molecular_function;GO:0003824//catalytic activity;GO:0004180//carboxypeptidase activity;GO:0004222//metalloendopeptidase activity;GO:0005488//binding;GO:0009014//succinyl-diaminopimelate desuccinylase activity;GO:0016787//hydrolase activity;GO:0016810//hydrolase activity, acting on carbon-nitrogen (but not peptide) bonds;GO:0043167//ion binding;GO:0043169//cation binding;GO:0046872//m…	GO:0001101//response to acid chemical;GO:0002682//regulation of immune system process;GO:0002831//regulation of response to biotic stimulus;GO:0006082//organic acid metabolic process;GO:0006508//proteolysis;GO:0008150//biological_process;GO:0008152//metabolic process;GO:0009089//lysine biosynthetic process via diaminopimelate;GO:0009694//jasmonic acid metabolic process;GO:0009719//response to end…	--
Unigene0000006	0.73	0.877	0.527	0.501	0.361	0.392	--	KAH0655037.1 hypothetical protein KY285_029919 [Solanum tuberosum]	-	-	-	-	-	-	-	--
Unigene0000007	0	0	3.891	0	0	0.089	pol	XP_039688613.1 uncharacterized protein LOC120579918 [Medicago truncatula]	-	-	-	-	-	-	GO:0015074//DNA integration	--
Unigene0000008	0	0.113	2.406	0	0	0	pro-pol	-	-	-	-	-	-	-	-	--
Unigene0000009	0	0	0.74	0	0	0	pol	-	-	-	-	-	-	-	-	--
Unigene0000010	0.328	0.108	0.921	0.468	0.253	0.352	--	PHU08199.1 hypothetical protein BC332_24688 [Capsicum chinense]	Organismal Systems	Environmental adaptation	ko04626//Plant-pathogen interaction	K13459	-	-	-	--
Unigene0000011	0.221	0.109	0.557	0.472	0	0	--	-	-	-	-	-	-	-	-	--
Unigene0000012	0.429	0.283	1.325	0	0.992	0.307	--	KAG5599929.1 hypothetical protein H5410_031299 [Solanum commersonii]	-	-	-	-	GO:0016021//integral component of membrane	-	GO:0016192//vesicle-mediated transport	--
Unigene0000013	0	0.874	1.487	0	0	0.158	--	-	-	-	-	-	-	-	-	--
Unigene0000014	0.539	0.427	0.998	0.921	0.374	1.388	--	-	-	-	-	-	-	-	-	--
Unigene0000015	1.875	3.376	1.866	1.154	0.723	1.708	BHLH120	XP_009587651.1 transcription factor bHLH36-like [Nicotiana tomentosiformis]	-	-	-	-	-	GO:0046983//protein dimerization activity	-	bHLH
Unigene0000016	0.143	0.707	0.241	0.916	0.165	0.767	--	-	-	-	-	-	-	-	-	--
Unigene0000017	0	0	0	0.503	0	0	--	-	-	-	-	-	-	-	-	--
Unigene0000018	0	0	0.3	0.127	0.275	0	--	-	-	-	-	-	-	-	-	--
Unigene0000019	0.784	0.932	0	1.006	0	0	--	-	-	-	-	-	-	-	-	--
Unigene0000020	0.175	0	0	1.122	0	0	--	-	-	-	-	-	-	-	-	--
Unigene0000021	22.724	19.993	19.099	9.36	9.66	9.089	CLPS3	PHT59448.1 Protein CLP1 -like protein [Capsicum baccatum]	Genetic Information Processing	Translation	ko03015//mRNA surveillance pathway	K14399	GO:0000214//tRNA-intron endonuclease complex;GO:0005575//cellular_component;GO:0005622//intracellular anatomical structure;GO:0005634//nucleus;GO:0005654//nucleoplasm;GO:0005737//cytoplasm;GO:0005829//cytosol;GO:0005849//mRNA cleavage factor complex;GO:0005887//integral component of plasma membrane;GO:0031974//membrane-enclosed lumen;GO:0031981//nuclear lumen;GO:0032991//protein-containing comple…	GO:0000166//nucleotide binding;GO:0003674//molecular_function;GO:0003824//catalytic activity;GO:0005488//binding;GO:0005524//ATP binding;GO:0016301//kinase activity;GO:0016740//transferase activity;GO:0016772//transferase activity, transferring phosphorus-containing groups;GO:0016773//phosphotransferase activity, alcohol group as acceptor;GO:0017076//purine nucleotide binding;GO:0019205//nucleoba…	GO:0000375//RNA splicing, via transesterification reactions;GO:0000377//RNA splicing, via transesterification reactions with bulged adenosine as nucleophile;GO:0000394//RNA splicing, via endonucleolytic cleavage and ligation;GO:0000398//mRNA splicing, via spliceosome;GO:0006139//nucleobase-containing compound metabolic process;GO:0006351//transcription, DNA-templated;GO:0006353//DNA-templated tra…	--
Unigene0000022	1.122	0.417	0.787	0.899	0.54	0.652	--	XP_016461061.1 PREDICTED: uncharacterized protein LOC107784443 [Nicotiana tabacum]	-	-	-	-	-	-	-	--
Unigene0000023	0.404	0	0	0	0	0	--	XP_016464535.1 PREDICTED: uncharacterized protein LOC107787465 [Nicotiana tabacum]	-	-	-	-	-	-	-	--
Unigene0000024	0.692	0	0	0	0	0.495	--	-	-	-	-	-	-	-	-	--
Unigene0000025	0.439	0.522	0.666	1.033	0.609	1.509	--	-	-	-	-	-	-	-	-	--
Unigene0000026	0	0.238	0	0	0	0.259	--	-	-	-	-	-	-	-	-	--
Unigene0000027	0.251	0.311	0.317	0.939	1.16	0.673	--	-	-	-	-	-	-	-	-	--
Unigene0000028	0	0	0	0	0	0.474	LOS1	XP_027061815.1 elongation factor 2-like [Coffea arabica]	-	-	-	-	-	GO:0003746//translation elongation factor activity;GO:0005525//GTP binding	GO:0006414//translational elongation	--
Unigene0000029	0.232	0.23	0.196	1.117	0.403	1.995	LOS1	XP_044473355.1 elongation factor 2-like [Mangifera indica]	-	-	-	-	-	GO:0003746//translation elongation factor activity;GO:0005525//GTP binding	GO:0006412//translation;GO:0006414//translational elongation;GO:0006950//response to stress	--
Unigene0000030	0	0.133	0.34	0.432	1.089	0.433	LOS1	CDP13594.1 unnamed protein product [Coffea canephora]	-	-	-	-	GO:0005737//cytoplasm	GO:0003743//translation initiation factor activity;GO:0003746//translation elongation factor activity;GO:0003747//translation release factor activity;GO:0003924//GTPase activity;GO:0004781//sulfate adenylyltransferase (ATP) activity;GO:0005525//GTP binding	GO:0000103//sulfate assimilation;GO:0001514//selenocysteine incorporation;GO:0006412//translation;GO:0006413//translational initiation;GO:0006414//translational elongation;GO:0006415//translational termination;GO:0006950//response to stress	--
Unigene0000031	0	0.166	0	0.179	0.581	0.36	LOS1	XP_027353774.1 elongation factor 2 [Abrus precatorius]	-	-	-	-	GO:0005840//ribosome	GO:0003735//structural constituent of ribosome;GO:0003746//translation elongation factor activity;GO:0005525//GTP binding	GO:0006412//translation;GO:0006414//translational elongation	--
Unigene0000032	10.866	8.454	10.967	6.459	5.895	6.249	--	XP_006342095.1 PREDICTED: ganglioside-induced differentiation-associated protein 2-like [Solanum tuberosum]	-	-	-	-	-	-	-	--
Unigene0000033	1.056	0.314	0.622	0	0.854	0.793	--	-	-	-	-	-	-	-	-	--
Unigene0000034	4.753	2.838	6.414	3.811	2.828	3.227	--	-	-	-	-	-	-	-	-	--
Unigene0000036	9.984	6.23	9.038	5.994	9.089	7.341	--	-	-	-	-	-	-	-	-	--
Unigene0000037	0	0.385	0	0	0	0	--	-	-	-	-	-	-	-	-	--
Unigene0000038	28.972	35.725	33.056	63.301	61.019	70.026	At5g14590	KAH0671627.1 hypothetical protein KY289_026120 [Solanum tuberosum]	Metabolism;Metabolism;Metabolism;Metabolism;Metabolism;Cellular Processes;Metabolism;Metabolism	Global and overview maps;Global and overview maps;Global and overview maps;Global and overview maps;Metabolism of other amino acids;Transport and catabolism;Carbohydrate metabolism;Global and overview maps	ko01100//Metabolic pathways;ko01110//Biosynthesis of secondary metabolites;ko01200//Carbon metabolism;ko01230//Biosynthesis of amino acids;ko00480//Glutathione metabolism;ko04146//Peroxisome;ko00020//Citrate cycle (TCA cycle);ko01210//2-Oxocarboxylic acid metabolism	K00031;K00031;K00031;K00031;K00031;K00031;K00031;K00031	GO:0005575//cellular_component;GO:0005622//intracellular anatomical structure;GO:0005737//cytoplasm;GO:0005739//mitochondrion;GO:0005962//mitochondrial isocitrate dehydrogenase complex (NAD+);GO:0009507//chloroplast;GO:0009532//plastid stroma;GO:0009534//chloroplast thylakoid;GO:0009536//plastid;GO:0009570//chloroplast stroma;GO:0009579//thylakoid;GO:0031976//plastid thylakoid;GO:0031984//organel…	GO:0000166//nucleotide binding;GO:0000287//magnesium ion binding;GO:0003674//molecular_function;GO:0003824//catalytic activity;GO:0003862//3-isopropylmalate dehydrogenase activity;GO:0004448//isocitrate dehydrogenase activity;GO:0004449//isocitrate dehydrogenase (NAD+) activity;GO:0004450//isocitrate dehydrogenase (NADP+) activity;GO:0005488//binding;GO:0016491//oxidoreductase activity;GO:0016614…	GO:0005975//carbohydrate metabolic process;GO:0006081//cellular aldehyde metabolic process;GO:0006082//organic acid metabolic process;GO:0006091//generation of precursor metabolites and energy;GO:0006097//glyoxylate cycle;GO:0006099//tricarboxylic acid cycle;GO:0006101//citrate metabolic process;GO:0006102//isocitrate metabolic process;GO:0008150//biological_process;GO:0008152//metabolic process;…	--
Unigene0000039	1.16	0	0	0	0	0	--	-	-	-	-	-	-	-	-	--
Unigene0000040	0.267	0.528	0.599	3.613	3.701	4.774	--	XP_009803116.1 PREDICTED: uncharacterized protein LOC104248543 isoform X2 [Nicotiana sylvestris]	-	-	-	-	-	-	-	--
Unigene0000042	5.507	4.821	6.445	1.813	2.018	2.505	--	XP_016512402.1 PREDICTED: uncharacterized protein LOC107829466 [Nicotiana tabacum]	-	-	-	-	-	-	-	--
Unigene0000043	1.748	2.142	2.37	0.317	0.822	0.191	--	-	-	-	-	-	-	-	-	--
Unigene0000044	0.264	0.784	0.444	0.282	0	0	--	-	-	-	-	-	-	-	-	--
Unigene0000045	9.359	7.582	10.851	10.686	11.161	12.422	POB1	XP_019262386.1 PREDICTED: BTB/POZ domain-containing protein POB1-like [Nicotiana attenuata]	-	-	-	-	-	GO:0005515//protein binding	-	--
Unigene0000046	0.616	0.975	1.451	1.579	0.569	0.661	--	-	-	-	-	-	-	-	-	--
Unigene0000047	0.705	0	0	0	0	0	--	-	-	-	-	-	-	-	-	--
Unigene0000048	0.843	0.513	1.2	1.732	1.273	0.765	--	-	-	-	-	-	-	-	-	--
Unigene0000050	1.08	0.856	0.909	0.231	0.166	0.155	--	-	-	-	-	-	-	-	-	--
Unigene0000051	1.191	0.726	0.54	0.392	0.212	0	--	-	-	-	-	-	-	GO:0046872//metal ion binding	-	--
Unigene0000052	1.194	0.517	0.817	1.037	0	0.801	--	-	-	-	-	-	-	-	-	--
Unigene0000053	0	0.573	0.487	0.619	0	0	--	-	-	-	-	-	-	-	-	--
Unigene0000054	0.749	1.113	0.315	0.133	0.433	0.134	--	-	-	-	-	-	-	-	GO:0015031//protein transport	--
Unigene0000055	0	0.445	0.757	0.24	0	0	--	-	-	-	-	-	-	-	-	--
Unigene0000056	70.416	67.575	73.96	151.464	172.048	160.114	--	KAH0634181.1 hypothetical protein KY284_036967 [Solanum tuberosum]	-	-	-	-	-	-	-	--
Unigene0000057	5.049	5.233	5.363	3.127	5.672	3.445	--	XP_009625481.1 uncharacterized protein LOC104116349 [Nicotiana tomentosiformis]	-	-	-	-	GO:0009986//cell surface;GO:0016021//integral component of membrane	GO:0038023//signaling receptor activity	GO:0046649//lymphocyte activation	--
Unigene0000058	375.135	368.939	404.287	15.689	9.95	31.072	LE16	XP_009757912.1 PREDICTED: uncharacterized protein LOC104210662 [Nicotiana sylvestris]	-	-	-	-	-	-	-	--
Unigene0000059	7.962	6.898	11.968	0.304	0.329	0.153	--	-	-	-	-	-	-	-	-	--
Unigene0000060	1.742	2.25	1.594	1.295	1.138	1.545	At5g08430	XP_006349304.1 PREDICTED: uncharacterized protein At5g08430-like isoform X2 [Solanum tuberosum]	-	-	-	-	-	GO:0003674//molecular_function;GO:0003676//nucleic acid binding;GO:0003677//DNA binding;GO:0005488//binding;GO:0005515//protein binding;GO:0043167//ion binding;GO:0043169//cation binding;GO:0046872//metal ion binding;GO:0097159//organic cyclic compound binding;GO:1901363//heterocyclic compound binding	-	--
Unigene0000061	28.688	32.273	35.239	39.959	40.918	36.106	PABN3	XP_006359788.1 PREDICTED: polyadenylate-binding protein 2-like [Solanum tuberosum]	Genetic Information Processing	Translation	ko03015//mRNA surveillance pathway	K14396	GO:0000228//nuclear chromosome;GO:0000785//chromatin;GO:0005575//cellular_component;GO:0005622//intracellular anatomical structure;GO:0005634//nucleus;GO:0005654//nucleoplasm;GO:0005694//chromosome;GO:0005730//nucleolus;GO:0005737//cytoplasm;GO:0005844//polysome;GO:0016604//nuclear body;GO:0031974//membrane-enclosed lumen;GO:0031981//nuclear lumen;GO:0032991//protein-containing complex;GO:0043226…	GO:0003674//molecular_function;GO:0003676//nucleic acid binding;GO:0003723//RNA binding;GO:0003727//single-stranded RNA binding;GO:0005488//binding;GO:0008143//poly(A) binding;GO:0070717//poly-purine tract binding;GO:0097159//organic cyclic compound binding;GO:1901363//heterocyclic compound binding	GO:0006139//nucleobase-containing compound metabolic process;GO:0006401//RNA catabolic process;GO:0006402//mRNA catabolic process;GO:0006725//cellular aromatic compound metabolic process;GO:0006807//nitrogen compound metabolic process;GO:0008150//biological_process;GO:0008152//metabolic process;GO:0008380//RNA splicing;GO:0009056//catabolic process;GO:0009057//macromolecule catabolic process;GO:0…	--
Unigene0000062	1.191	0.761	1.197	0.739	0.888	0.701	PABN3	XP_016486829.1 PREDICTED: polyadenylate-binding protein 2-like isoform X1 [Nicotiana tabacum]	Genetic Information Processing	Translation	ko03015//mRNA surveillance pathway	K14396	-	-	-	--
Unigene0000063	36.842	34.69	36.358	31.822	30.553	30.017	HMG3	KAH0684249.1 hypothetical protein KY289_022001 [Solanum tuberosum]	Metabolism;Metabolism;Metabolism	Global and overview maps;Global and overview maps;Metabolism of terpenoids and polyketides	ko01100//Metabolic pathways;ko01110//Biosynthesis of secondary metabolites;ko00900//Terpenoid backbone biosynthesis	K00021;K00021;K00021	-	GO:0004420//hydroxymethylglutaryl-CoA reductase (NADPH) activity	GO:0008299//isoprenoid biosynthetic process;GO:0015936//coenzyme A metabolic process;GO:0016054//organic acid catabolic process	--
Unigene0000064	79.197	98.489	92.013	64.607	56.698	58.243	PDAT1	XP_019238812.1 PREDICTED: phospholipid:diacylglycerol acyltransferase 1-like [Nicotiana attenuata]	Metabolism;Metabolism	Global and overview maps;Lipid metabolism	ko01100//Metabolic pathways;ko00561//Glycerolipid metabolism	K00679;K00679	-	GO:0008374//O-acyltransferase activity	GO:0006629//lipid metabolic process	--
Unigene0000065	6.09	5.123	8.269	1.26	1.135	0.281	At4g30660	XP_016579748.1 PREDICTED: UPF0057 membrane protein At4g30660-like [Capsicum annuum]	-	-	-	-	GO:0016021//integral component of membrane	-	-	--
Unigene0000066	24.997	17.37	19.381	23.907	17.739	15.064	At4g30660	KAG5593732.1 hypothetical protein H5410_034964 [Solanum commersonii]	-	-	-	-	GO:0016021//integral component of membrane	-	-	--
Unigene0000067	120.993	97.204	114.664	63.078	78.496	56.177	At2g24040	XP_006343636.2 PREDICTED: UPF0057 membrane protein At4g30660-like [Solanum tuberosum]	-	-	-	-	GO:0005575//cellular_component;GO:0016020//membrane;GO:0016021//integral component of membrane;GO:0031224//intrinsic component of membrane	-	-	--
Unigene0000068	2.108	0	0.807	0.205	0.664	0	At2g24040	XP_006343636.2 PREDICTED: UPF0057 membrane protein At4g30660-like [Solanum tuberosum]	-	-	-	-	GO:0016021//integral component of membrane	-	-	--
Unigene0000069	6.5	7.921	8.249	6.039	6.183	6.065	At2g02148	KAH0692288.1 hypothetical protein KY285_019385 [Solanum tuberosum]	-	-	-	-	-	-	-	--
Unigene0000070	0	0	1.057	0	0.871	0	--	-	-	-	-	-	-	-	-	--
Unigene0000071	0.239	0.355	0.704	0.766	0	0.898	--	-	-	-	-	-	-	-	-	--
Unigene0000072	0.255	0	0	0	0.886	0	--	-	-	-	-	-	-	-	-	--
Unigene0000073	0	0	0	0	0.292	0	--	-	-	-	-	-	-	-	-	--
Unigene0000074	0.677	1.3	0.905	0.638	0.138	0.299	--	-	-	-	-	-	-	GO:0003677//DNA binding;GO:0003917//DNA topoisomerase type I (single strand cut, ATP-independent) activity	GO:0006265//DNA topological change	--
Unigene0000075	0.741	0	0.831	0.528	0	0	--	-	-	-	-	-	-	-	-	--
Unigene0000076	1.034	0.585	0.497	0.316	0	0.634	--	-	-	-	-	-	-	-	-	--
Unigene0000078	6.412	5.385	2.938	2.429	1.595	2.353	PBF	PHU03404.1 Dof zinc finger protein DOF5.3 [Capsicum chinense]	-	-	-	-	-	GO:0003677//DNA binding;GO:0003899//DNA-directed 5'-3' RNA polymerase activity	GO:0006351//transcription, DNA-templated;GO:0006355//regulation of transcription, DNA-templated	--
Unigene0000079	1.807	2.334	2.381	0.672	0.363	0.422	DOF5.3	KAH0661372.1 hypothetical protein KY284_026303 [Solanum tuberosum]	-	-	-	-	-	GO:0003677//DNA binding	GO:0006355//regulation of transcription, DNA-templated	--
Unigene0000080	9.876	8.449	7.013	11.059	9.162	10.89	DOF5.3	PHU03404.1 Dof zinc finger protein DOF5.3 [Capsicum chinense]	-	-	-	-	-	GO:0003677//DNA binding	GO:0006355//regulation of transcription, DNA-templated;GO:0010124//phenylacetate catabolic process	--
Unigene0000081	2.894	3.634	2.733	2.263	0.653	0.53	DOF5.3	XP_019228430.1 PREDICTED: dof zinc finger protein DOF2.1-like [Nicotiana attenuata]	-	-	-	-	-	GO:0003677//DNA binding	GO:0006355//regulation of transcription, DNA-templated;GO:0010124//phenylacetate catabolic process	--
Unigene0000082	0.281	0	0	0	0	0	--	-	-	-	-	-	-	-	-	--
Unigene0000083	13.839	17.702	24.342	12.95	7.592	15.376	DOF5.4	XP_009779672.1 PREDICTED: dof zinc finger protein DOF5.4-like [Nicotiana sylvestris]	-	-	-	-	GO:0005634//nucleus	GO:0003677//DNA binding	GO:0006355//regulation of transcription, DNA-templated	--
Unigene0000084	1.409	0.698	1.483	1.13	0.407	1.323	DOF2.5	XP_009616794.1 dof zinc finger protein DOF2.5-like isoform X1 [Nicotiana tomentosiformis]	-	-	-	-	-	GO:0003677//DNA binding	GO:0006355//regulation of transcription, DNA-templated;GO:0010124//phenylacetate catabolic process	--
Unigene0000085	0.671	0	1.13	0.239	0.776	0.24	--	-	-	-	-	-	-	-	-	--
Unigene0000086	1.915	0.802	1.643	1.732	2.043	0.751	--	-	-	-	-	-	-	-	-	--
Unigene0000087	3.76	1.515	2.687	2.337	2.577	1.971	--	-	-	-	-	-	-	-	-	--
Unigene0000088	0.209	1.866	0	0.448	0	0.674	--	-	-	-	-	-	-	-	-	--
Unigene0000089	0.947	0.772	0.141	1.131	0.837	0.717	--	-	-	-	-	-	-	-	-	--
Unigene0000090	0	0	0	0	0.295	0	--	-	-	-	-	-	-	-	-	--
Unigene0000091	0.522	0.31	0.615	0.558	1.206	1.12	--	-	-	-	-	-	-	-	-	--
Unigene0000092	0.773	1.203	0.093	0	0.638	0.711	--	-	-	-	-	-	-	-	-	--
Unigene0000094	0	0	0	1.538	0	0	--	-	-	-	-	-	-	-	-	--
Unigene0000095	0.246	0.243	0	0	0	0	--	-	-	-	-	-	-	-	-	--
Unigene0000096	7.076	8.308	10.041	11.886	15.304	13.564	NRPB9B	XP_004239877.1 DNA-directed RNA polymerases II, IV and V subunit 9A [Solanum lycopersicum]	Genetic Information Processing	Transcription	ko03020//RNA polymerase	K03017	GO:0000428//DNA-directed RNA polymerase complex;GO:0005575//cellular_component;GO:0005622//intracellular anatomical structure;GO:0005634//nucleus;GO:0005654//nucleoplasm;GO:0005665//RNA polymerase II, core complex;GO:0005730//nucleolus;GO:0016591//RNA polymerase II, holoenzyme;GO:0030880//RNA polymerase complex;GO:0031974//membrane-enclosed lumen;GO:0031981//nuclear lumen;GO:0032991//protein-cont…	GO:0003674//molecular_function;GO:0003676//nucleic acid binding;GO:0003700//DNA-binding transcription factor activity;GO:0003824//catalytic activity;GO:0003899//DNA-directed 5'-3' RNA polymerase activity;GO:0005488//binding;GO:0008270//zinc ion binding;GO:0016740//transferase activity;GO:0016772//transferase activity, transferring phosphorus-containing groups;GO:0016779//nucleotidyltransferase ac…	GO:0000375//RNA splicing, via transesterification reactions;GO:0000377//RNA splicing, via transesterification reactions with bulged adenosine as nucleophile;GO:0000398//mRNA splicing, via spliceosome;GO:0001192//maintenance of transcriptional fidelity during DNA-templated transcription elongation;GO:0001193//maintenance of transcriptional fidelity during DNA-templated transcription elongation fro…	--
Unigene0000097	1.618	3.065	0.948	0.15	0.407	0.076	--	-	-	-	-	-	-	-	-	--
Unigene0000100	0	0	0	0	0	0.277	--	-	-	-	-	-	-	-	-	--
Unigene0000101	10.092	9.403	13.324	2.516	1.782	1.714	--	XP_015069671.1 ankyrin-1-like [Solanum pennellii]	-	-	-	-	-	GO:0005515//protein binding;GO:0008270//zinc ion binding	-	--
Unigene0000102	2.831	2.421	4.089	3.576	4.35	3.177	--	-	-	-	-	-	-	-	-	--
Unigene0000103	1.035	1.025	2.081	0.983	1.329	1.173	--	-	-	-	-	-	-	-	-	--
Unigene0000105	0.155	0	0.131	0.913	0.898	0.834	--	-	-	-	-	-	-	-	-	--
Unigene0000107	0.205	0.474	0.748	0.584	0.237	0.513	--	-	-	-	-	-	-	-	-	--
Unigene0000109	0	0	0.329	0	0.226	0	--	XP_019234078.1 PREDICTED: uncharacterized protein LOC109214596 [Nicotiana attenuata]	-	-	-	-	-	-	-	--
Unigene0000110	0.716	0.273	0.696	0.707	0.255	0.532	atpA	YP_009561812.1 AtpA [Lycium barbarum]	Metabolism;Metabolism;Metabolism	Global and overview maps;Energy metabolism;Energy metabolism	ko01100//Metabolic pathways;ko00190//Oxidative phosphorylation;ko00195//Photosynthesis	K02111;K02111;K02111	GO:0000275//mitochondrial proton-transporting ATP synthase complex, catalytic sector F(1);GO:0045261//proton-transporting ATP synthase complex, catalytic core F(1);GO:0045262//plasma membrane proton-transporting ATP synthase complex, catalytic core F(1)	GO:0046933//proton-transporting ATP synthase activity, rotational mechanism	GO:0015986//ATP synthesis coupled proton transport	--
Unigene0000111	31.547	33.188	37.542	69.942	70.821	74.932	FTSH4	XP_016452156.1 PREDICTED: ATP-dependent zinc metalloprotease FTSH 4, mitochondrial-like isoform X1 [Nicotiana tabacum]	-	-	-	-	GO:0000502//proteasome complex;GO:0009368//endopeptidase Clp complex;GO:0009376//HslUV protease complex;GO:0009379//Holliday junction helicase complex	GO:0003678//DNA helicase activity;GO:0004176//ATP-dependent peptidase activity;GO:0004222//metalloendopeptidase activity;GO:0004252//serine-type endopeptidase activity;GO:0005524//ATP binding;GO:0009378//four-way junction helicase activity;GO:0016887//ATP hydrolysis activity;GO:0051082//unfolded protein binding	GO:0006281//DNA repair;GO:0006310//DNA recombination;GO:0006508//proteolysis;GO:0009306//protein secretion;GO:0010498//proteasomal protein catabolic process;GO:0019941//modification-dependent protein catabolic process;GO:0030436//asexual sporulation;GO:0043335//protein unfolding;GO:0051301//cell division	--
Unigene0000112	0.148	0.879	0.872	0.316	0	0.476	--	-	-	-	-	-	-	-	-	--
Unigene0000113	13.017	12.021	14.324	17.354	18.82	16.957	FTSH4	KAH0746856.1 hypothetical protein KY285_008513 [Solanum tuberosum]	-	-	-	-	GO:0000502//proteasome complex;GO:0009368//endopeptidase Clp complex;GO:0009376//HslUV protease complex;GO:0009379//Holliday junction helicase complex	GO:0003678//DNA helicase activity;GO:0004176//ATP-dependent peptidase activity;GO:0004222//metalloendopeptidase activity;GO:0004252//serine-type endopeptidase activity;GO:0005524//ATP binding;GO:0009378//four-way junction helicase activity;GO:0016887//ATP hydrolysis activity;GO:0051082//unfolded protein binding	GO:0006281//DNA repair;GO:0006310//DNA recombination;GO:0006508//proteolysis;GO:0009306//protein secretion;GO:0010498//proteasomal protein catabolic process;GO:0019941//modification-dependent protein catabolic process;GO:0030436//asexual sporulation;GO:0043335//protein unfolding;GO:0051301//cell division	--
Unigene0000114	0.122	0.602	0.819	0	1.124	0.261	--	-	-	-	-	-	-	-	-	--
Unigene0000115	0.195	0	0.491	0	0	0.209	--	-	-	-	-	-	-	-	-	--
Unigene0000116	1.661	0.822	1.923	1.221	1.8	3.121	--	-	-	-	-	-	-	-	-	--
Unigene0000117	0.295	0.584	0.248	0.63	0	0	ROQ1	PHT85320.1 hypothetical protein T459_07426 [Capsicum annuum]	-	-	-	-	-	GO:0005515//protein binding	GO:0007165//signal transduction	--
Unigene0000120	15.343	14.476	15.815	13.105	12.398	15.139	CPSF160	PHT87114.1 putative cleavage and polyadenylation specificity factor subunit 1 [Capsicum annuum]	Genetic Information Processing	Translation	ko03015//mRNA surveillance pathway	K14401	GO:0005575//cellular_component;GO:0005622//intracellular anatomical structure;GO:0005634//nucleus;GO:0005737//cytoplasm;GO:0005829//cytosol;GO:0043226//organelle;GO:0043227//membrane-bounded organelle;GO:0043229//intracellular organelle;GO:0043231//intracellular membrane-bounded organelle	GO:0003674//molecular_function;GO:0003676//nucleic acid binding;GO:0003723//RNA binding;GO:0003729//mRNA binding;GO:0005488//binding;GO:0097159//organic cyclic compound binding;GO:1901363//heterocyclic compound binding	GO:0006139//nucleobase-containing compound metabolic process;GO:0006378//mRNA polyadenylation;GO:0006379//mRNA cleavage;GO:0006396//RNA processing;GO:0006397//mRNA processing;GO:0006725//cellular aromatic compound metabolic process;GO:0006807//nitrogen compound metabolic process;GO:0008150//biological_process;GO:0008152//metabolic process;GO:0009987//cellular process;GO:0010467//gene expression;G…	--
Unigene0000121	0.363	0.539	0.458	0.388	0.419	0	--	-	-	-	-	-	-	-	-	--
Unigene0000122	0.726	0.719	0.408	0	0	0	--	KAH0709550.1 hypothetical protein KY284_010977 [Solanum tuberosum]	-	-	-	-	-	-	-	--
Unigene0000126	0.139	0.137	0.7	0	0	0	--	XP_016433957.1 PREDICTED: uncharacterized protein LOC107760425 [Nicotiana tabacum]	-	-	-	-	-	-	-	--
Unigene0000127	0.777	0.481	0.817	0.208	0.112	0.208	--	-	-	-	-	-	-	-	-	--
Unigene0000128	1.152	2.118	0.831	2.052	4.881	1.884	ND4	YP_009242020.1 NADH dehydrogenase subunit 4 [Oryza minuta]	Metabolism;Metabolism	Global and overview maps;Energy metabolism	ko01100//Metabolic pathways;ko00190//Oxidative phosphorylation	K03881;K03881	-	-	-	--
Unigene0000129	0.385	1.272	0	0.275	0.149	0.138	--	XP_016490487.1 PREDICTED: uncharacterized protein LOC107810242 [Nicotiana tabacum]	-	-	-	-	GO:0005576//extracellular region	GO:0004859//phospholipase inhibitor activity	-	--
Unigene0000130	0	0	0	0	0	0.385	--	XP_019238062.1 PREDICTED: uncharacterized protein LOC109218173 [Nicotiana attenuata]	-	-	-	-	-	-	-	--
Unigene0000131	1.28	0.845	1.271	0.491	0.265	0.458	--	XP_019230857.1 PREDICTED: uncharacterized protein LOC109211739 [Nicotiana attenuata]	-	-	-	-	GO:0005956//protein kinase CK2 complex	GO:0019887//protein kinase regulator activity	-	--
Unigene0000132	4.648	2.216	3.841	0.644	1.99	0.277	--	AIG89840.1 hypothetical protein [Capsicum annuum]	-	-	-	-	-	-	-	--
Unigene0000133	1.462	0.944	1.872	0.068	0.147	0.273	--	XP_019248623.1 PREDICTED: uncharacterized protein LOC109227885 [Nicotiana attenuata]	-	-	-	-	-	-	-	--
Unigene0000134	6.598	6.125	9.069	10.689	9.83	6.53	TIM21	XP_006343941.1 PREDICTED: probable mitochondrial import inner membrane translocase subunit TIM21 [Solanum tuberosum]	-	-	-	-	GO:0005575//cellular_component;GO:0005622//intracellular anatomical structure;GO:0005737//cytoplasm;GO:0005739//mitochondrion;GO:0005740//mitochondrial envelope;GO:0005743//mitochondrial inner membrane;GO:0005744//TIM23 mitochondrial import inner membrane translocase complex;GO:0005886//plasma membrane;GO:0016020//membrane;GO:0016021//integral component of membrane;GO:0019866//organelle inner mem…	GO:0003674//molecular_function	GO:0006605//protein targeting;GO:0006626//protein targeting to mitochondrion;GO:0006810//transport;GO:0006839//mitochondrial transport;GO:0006886//intracellular protein transport;GO:0006996//organelle organization;GO:0007005//mitochondrion organization;GO:0007275//multicellular organism development;GO:0008104//protein localization;GO:0008150//biological_process;GO:0008535//respiratory chain compl…	--
Unigene0000135	0.911	0.774	0.219	0.278	0.451	1.118	--	-	-	-	-	-	-	-	-	--
Unigene0000136	6.92	7.284	7.609	13.16	15.058	15.626	--	KAH0756944.1 hypothetical protein KY290_020437 [Solanum tuberosum]	-	-	-	-	-	-	-	--
Unigene0000137	0	0.352	0.299	0	0	0	--	-	-	-	-	-	GO:0031224//intrinsic component of membrane	GO:0003674//molecular_function	GO:0051205//protein insertion into membrane	--
Unigene0000138	0	0	0.538	0	0	0	--	-	-	-	-	-	-	-	-	--
Unigene0000139	0	0.416	0	0	0.485	0	--	XP_016442247.1 PREDICTED: probable LRR receptor-like serine/threonine-protein kinase At3g47570 [Nicotiana tabacum]	-	-	-	-	-	GO:0004672//protein kinase activity;GO:0005515//protein binding;GO:0005524//ATP binding	GO:0006468//protein phosphorylation	--
Unigene0000140	0.38	0	0	0	0	0	--	-	-	-	-	-	-	-	-	--
Unigene0000141	43.08	49.238	42.053	10.287	11.565	12.299	rpsF	XP_006337999.1 PREDICTED: uncharacterized protein LOC102594367 [Solanum tuberosum]	-	-	-	-	GO:0000314//organellar small ribosomal subunit;GO:0005575//cellular_component;GO:0005622//intracellular anatomical structure;GO:0005737//cytoplasm;GO:0005840//ribosome;GO:0022627//cytosolic small ribosomal subunit;GO:0032991//protein-containing complex;GO:0043226//organelle;GO:0043228//non-membrane-bounded organelle;GO:0043229//intracellular organelle;GO:0043232//intracellular non-membrane-bounde…	GO:0003674//molecular_function;GO:0003676//nucleic acid binding;GO:0003723//RNA binding;GO:0003735//structural constituent of ribosome;GO:0005198//structural molecule activity;GO:0005488//binding;GO:0019843//rRNA binding;GO:0097159//organic cyclic compound binding;GO:1901363//heterocyclic compound binding	GO:0006412//translation;GO:0006518//peptide metabolic process;GO:0006807//nitrogen compound metabolic process;GO:0008150//biological_process;GO:0008152//metabolic process;GO:0009058//biosynthetic process;GO:0009059//macromolecule biosynthetic process;GO:0009987//cellular process;GO:0010467//gene expression;GO:0019538//protein metabolic process;GO:0034641//cellular nitrogen compound metabolic proc…	--
Unigene0000142	28.345	16.258	11.349	5.542	3.995	6.865	CYP71AU50	XP_006363549.1 PREDICTED: cytochrome P450 CYP736A12-like isoform X1 [Solanum tuberosum]	-	-	-	-	-	GO:0005506//iron ion binding;GO:0016705//oxidoreductase activity, acting on paired donors, with incorporation or reduction of molecular oxygen;GO:0020037//heme binding	-	--
Unigene0000143	0	0	0	0	1.166	0	CYP71B5	XP_006363549.1 PREDICTED: cytochrome P450 CYP736A12-like isoform X1 [Solanum tuberosum]	-	-	-	-	-	GO:0005506//iron ion binding;GO:0016705//oxidoreductase activity, acting on paired donors, with incorporation or reduction of molecular oxygen;GO:0020037//heme binding	-	--
Unigene0000144	0.665	0.494	0.769	0.71	0.288	0.446	--	-	-	-	-	-	-	-	-	--
Unigene0000145	0.822	0	0	0	0.237	0.441	--	-	-	-	-	-	-	-	-	--
Unigene0000146	0.475	0	0	0	0	0.255	--	-	-	-	-	-	-	-	-	--
Unigene0000147	27.435	37.083	30.854	50.621	45.715	45.695	ARP1	XP_033509637.1 RNA-binding protein 38 isoform X3 [Nicotiana tomentosiformis]	-	-	-	-	GO:0005575//cellular_component;GO:0005622//intracellular anatomical structure;GO:0005634//nucleus;GO:0005737//cytoplasm;GO:0005829//cytosol;GO:0043226//organelle;GO:0043227//membrane-bounded organelle;GO:0043229//intracellular organelle;GO:0043231//intracellular membrane-bounded organelle	GO:0003674//molecular_function;GO:0003676//nucleic acid binding;GO:0003723//RNA binding;GO:0003729//mRNA binding;GO:0003730//mRNA 3'-UTR binding;GO:0005488//binding;GO:0097159//organic cyclic compound binding;GO:1901363//heterocyclic compound binding	GO:0000075//cell cycle checkpoint signaling;GO:0000077//DNA damage checkpoint signaling;GO:0000278//mitotic cell cycle;GO:0006139//nucleobase-containing compound metabolic process;GO:0006396//RNA processing;GO:0006397//mRNA processing;GO:0006725//cellular aromatic compound metabolic process;GO:0006807//nitrogen compound metabolic process;GO:0006950//response to stress;GO:0006974//cellular respons…	--
Unigene0000148	0	0	0	0	0.312	0.29	--	-	-	-	-	-	-	-	-	--
Unigene0000149	1.77	0.876	1.937	0	0	0.57	--	-	-	-	-	-	-	-	-	--
Unigene0000150	0.779	0.441	0.094	0.238	0.129	0	--	-	-	-	-	-	-	-	-	--
Unigene0000151	0.756	0.998	0	0	0.291	0.27	--	-	-	-	-	-	-	-	-	--
Unigene0000153	0.408	0	0	0	0	0	--	-	-	-	-	-	-	-	-	--
Unigene0000155	7.336	9.995	9.519	2.064	1.403	1.658	--	XP_009604098.1 uncharacterized tRNA/rRNA methyltransferase slr1673 [Nicotiana tomentosiformis]	-	-	-	-	-	GO:0003723//RNA binding;GO:0008173//RNA methyltransferase activity;GO:0008175//tRNA methyltransferase activity;GO:0008914//leucyltransferase activity	GO:0006396//RNA processing;GO:0006400//tRNA modification;GO:0009451//RNA modification;GO:0030163//protein catabolic process	--
Unigene0000156	15.229	13.036	14.824	24.328	23.917	25.449	CAMTA4	XP_006341902.1 PREDICTED: calmodulin-binding transcription activator 4-like isoform X2 [Solanum tuberosum]	-	-	-	-	-	GO:0003677//DNA binding;GO:0005515//protein binding	-	--
Unigene0000157	7.881	6.206	11.406	12.315	12.969	13.38	CAMTA4	XP_006352172.1 PREDICTED: calmodulin-binding transcription activator 4 isoform X1 [Solanum tuberosum]	-	-	-	-	-	GO:0003674//molecular_function;GO:0003677//DNA binding;GO:0005515//protein binding	GO:0030436//asexual sporulation	--
Unigene0000158	1.501	1.156	0.842	0.713	0.193	0.627	--	-	-	-	-	-	-	-	-	--
Unigene0000159	4.081	3.271	5.3	0.582	0.18	0.042	--	XP_015060205.1 signal peptidase complex-like protein DTM1 [Solanum pennellii]	-	-	-	-	GO:0005787//signal peptidase complex;GO:0016021//integral component of membrane	-	GO:0006465//signal peptide processing	--
Unigene0000160	0.179	0.177	0	0.383	0.414	0.192	--	-	-	-	-	-	-	-	-	--
Unigene0000161	0.157	0.62	0.791	1.004	0	0.336	--	-	-	-	-	-	-	-	-	--
Unigene0000162	37.583	0	24.666	18.487	50.997	0	--	-	-	-	-	-	-	-	-	--
Unigene0000163	0.369	0.609	0.31	0.657	0.71	0.924	--	-	-	-	-	-	-	-	-	--
Unigene0000166	1.224	0	0	0	0	0	CYP83B1	XP_016566222.1 PREDICTED: cytochrome P450 83B1-like [Capsicum annuum]	-	-	-	-	-	GO:0005506//iron ion binding;GO:0016705//oxidoreductase activity, acting on paired donors, with incorporation or reduction of molecular oxygen;GO:0020037//heme binding	-	--
Unigene0000167	0	0	0	1.327	0.478	0.666	--	-	-	-	-	-	-	-	-	--
Unigene0000168	9.758	14.628	12.252	28.785	32.509	31.073	--	PHT63937.1 hypothetical protein T459_32235 [Capsicum annuum]	-	-	-	-	-	-	-	--
Unigene0000170	0.322	0	0	0	0	0	--	-	-	-	-	-	-	-	-	--
Unigene0000171	0	0	0.289	0	0	0	--	-	-	-	-	-	-	-	-	--
Unigene0000174	0.297	0	0.5	0	0	0	--	-	-	-	-	-	-	-	-	--
Unigene0000175	0.322	0.319	0	0	0	0	--	-	-	-	-	-	-	-	-	--
Unigene0000176	0	0	0.672	0	0.922	0	--	-	-	-	-	-	-	-	-	--
Unigene0000178	7.434	3.155	9.834	1.135	0.921	0	CYP76B10	PHU21142.1 Geraniol 8-hydroxylase [Capsicum chinense]	-	-	-	-	-	GO:0005506//iron ion binding;GO:0016705//oxidoreductase activity, acting on paired donors, with incorporation or reduction of molecular oxygen;GO:0020037//heme binding	-	--
Unigene0000179	0.894	1.312	1.116	2.537	4.168	4.764	NLP7	PHT37145.1 hypothetical protein CQW23_24845 [Capsicum baccatum]	-	-	-	-	-	GO:0005515//protein binding	-	--
Unigene0000180	27.192	45.96	34.071	25.479	19.874	22.887	OsI_002060	XP_009801696.1 PREDICTED: histone H2A [Nicotiana sylvestris]	-	-	-	-	GO:0000228//nuclear chromosome;GO:0000785//chromatin;GO:0000786//nucleosome;GO:0005575//cellular_component;GO:0005622//intracellular anatomical structure;GO:0005634//nucleus;GO:0005694//chromosome;GO:0031974//membrane-enclosed lumen;GO:0031981//nuclear lumen;GO:0032991//protein-containing complex;GO:0032993//protein-DNA complex;GO:0043226//organelle;GO:0043227//membrane-bounded organelle;GO:00432…	GO:0003674//molecular_function;GO:0003676//nucleic acid binding;GO:0003677//DNA binding;GO:0005488//binding;GO:0005515//protein binding;GO:0046982//protein heterodimerization activity;GO:0046983//protein dimerization activity;GO:0097159//organic cyclic compound binding;GO:1901363//heterocyclic compound binding	GO:0006325//chromatin organization;GO:0006355//regulation of transcription, DNA-templated;GO:0006996//organelle organization;GO:0008150//biological_process;GO:0009889//regulation of biosynthetic process;GO:0009890//negative regulation of biosynthetic process;GO:0009892//negative regulation of metabolic process;GO:0009987//cellular process;GO:0010468//regulation of gene expression;GO:0010556//regu…	--
Unigene0000181	35.959	35.653	38.117	21.899	15.858	13.968	NADKC	XP_016575359.1 PREDICTED: uncharacterized protein LOC107873135 [Capsicum annuum]	-	-	-	-	-	GO:0005524//ATP binding;GO:0016301//kinase activity	-	--
Unigene0000182	4.978	5.299	4.46	1.292	1.171	1.088	--	-	-	-	-	-	-	-	-	--
Unigene0000184	0.904	0.688	0.644	0.372	0.161	0.224	--	-	-	-	-	-	-	-	-	--
Unigene0000185	1.494	0.555	0	0	0	0	--	-	-	-	-	-	-	-	-	--
Unigene0000186	1.284	0.715	0.946	0.257	0.835	0.172	--	XP_019255303.1 PREDICTED: uncharacterized protein LOC109233908 [Nicotiana attenuata]	-	-	-	-	-	-	-	--
Unigene0000187	0.751	0.248	0	0	0	0	--	-	-	-	-	-	-	-	-	--
Unigene0000188	0	0	0.217	0	0	0	--	-	-	-	-	-	-	-	-	--
Unigene0000190	0	0	0	0.38	0	0	--	-	-	-	-	-	-	-	-	--
Unigene0000191	79.866	83.182	88.369	14.775	11.191	12.186	PRP1	XP_009780289.1 PREDICTED: uncharacterized protein LOC104229355 [Nicotiana sylvestris]	-	-	-	-	-	GO:0005515//protein binding;GO:0016034//maleylacetoacetate isomerase activity	GO:0006559//L-phenylalanine catabolic process;GO:0006572//tyrosine catabolic process;GO:0006749//glutathione metabolic process	--
Unigene0000192	0.594	0	0	0.423	0.458	0	TIC214	YP_009704848.1 ycf1 protein [Euphrasia regelii]	-	-	-	-	GO:0016021//integral component of membrane	-	-	--
Unigene0000196	1.688	2.198	1.992	0.882	1.293	1.339	--	-	-	-	-	-	-	-	-	--
Unigene0000197	1.511	0.166	1.131	0	0	0	--	-	-	-	-	-	-	-	-	--
Unigene0000198	0	0.746	0	0	0	0	--	-	-	-	-	-	-	-	-	--
Unigene0000199	2.047	1.655	2.216	3.706	4.104	3.498	--	KAH0664175.1 hypothetical protein KY284_029106 [Solanum tuberosum]	-	-	-	-	-	-	-	--
Unigene0000200	1.338	1.491	1.901	11.085	14.208	13.915	--	XP_019254216.1 PREDICTED: uncharacterized protein LOC109232966 [Nicotiana attenuata]	-	-	-	-	-	-	-	--
Unigene0000202	0.662	0.58	1.35	0.953	0.853	1.667	--	-	-	-	-	-	-	-	-	--
Unigene0000204	0	0	0.171	0.433	0	0	--	-	-	-	-	-	-	-	-	--
Unigene0000205	0.519	0.701	0.755	1.412	1.363	1.317	--	-	-	-	-	-	-	-	-	--
Unigene0000206	0	0	0	0.433	1.405	0.653	--	KAF3664280.1 putative TGACG-sequence-specific DNA-binding protein TGA-2.1-like [Capsicum annuum]	-	-	-	-	-	-	-	--
Unigene0000207	0.374	0.667	0.441	0.4	0.519	0.724	--	-	-	-	-	-	GO:0005634//nucleus	GO:0003700//DNA-binding transcription factor activity	GO:0006355//regulation of transcription, DNA-templated	--
Unigene0000209	33.251	24.823	25.353	10.731	7.31	5.98	--	KAH0636698.1 hypothetical protein KY289_036613 [Solanum tuberosum]	-	-	-	-	-	-	-	--
Unigene0000210	0	0.691	0.147	0	0	0	--	-	-	-	-	-	-	-	-	--
Unigene0000211	0.511	0.506	0.344	1.419	0.118	0.439	--	-	-	-	-	-	-	-	-	--
Unigene0000212	11.471	10.665	9.677	3.459	4.549	3.655	UROS	PHT51158.1 Uroporphyrinogen-III synthase, chloroplastic [Capsicum baccatum]	Metabolism;Metabolism;Metabolism	Global and overview maps;Global and overview maps;Metabolism of cofactors and vitamins	ko01100//Metabolic pathways;ko01110//Biosynthesis of secondary metabolites;ko00860//Porphyrin metabolism	K01719;K01719;K01719	-	GO:0004852//uroporphyrinogen-III synthase activity	GO:0033014//tetrapyrrole biosynthetic process	--
Unigene0000214	11.138	10.477	10.983	16.922	14.527	13.835	--	KAH0640451.1 hypothetical protein KY285_037037 [Solanum tuberosum]	-	-	-	-	-	-	-	--
Unigene0000215	3.012	1.873	3.744	162.612	116.283	131.541	NPF2.10	PHT47821.1 Protein NRT1/ PTR FAMILY 2.9 [Capsicum baccatum]	-	-	-	-	GO:0016020//membrane	GO:0015333//peptide:proton symporter activity;GO:0022857//transmembrane transporter activity	GO:0015833//peptide transport;GO:0055085//transmembrane transport	--
Unigene0000216	3.328	3.037	3.315	2.581	2.263	2.756	CHR24	KAG5627637.1 hypothetical protein H5410_012855 [Solanum commersonii]	-	-	-	-	GO:0000775//chromosome, centromeric region;GO:0000776//kinetochore;GO:0000779//condensed chromosome, centromeric region;GO:0000793//condensed chromosome;GO:0005575//cellular_component;GO:0005622//intracellular anatomical structure;GO:0005634//nucleus;GO:0005694//chromosome;GO:0016591//RNA polymerase II, holoenzyme;GO:0032991//protein-containing complex;GO:0043226//organelle;GO:0043227//membrane-b…	GO:0000166//nucleotide binding;GO:0003674//molecular_function;GO:0003676//nucleic acid binding;GO:0003677//DNA binding;GO:0003824//catalytic activity;GO:0004386//helicase activity;GO:0005488//binding;GO:0005524//ATP binding;GO:0016462//pyrophosphatase activity;GO:0016787//hydrolase activity;GO:0016817//hydrolase activity, acting on acid anhydrides;GO:0016818//hydrolase activity, acting on acid an…	GO:0000018//regulation of DNA recombination;GO:0000019//regulation of mitotic recombination;GO:0006139//nucleobase-containing compound metabolic process;GO:0006259//DNA metabolic process;GO:0006310//DNA recombination;GO:0006508//proteolysis;GO:0006725//cellular aromatic compound metabolic process;GO:0006807//nitrogen compound metabolic process;GO:0007049//cell cycle;GO:0008150//biological_process…	--
Unigene0000218	1.609	1.433	1.219	0	0	0	At1g53420	PHT36013.1 hypothetical protein CQW23_23713 [Capsicum baccatum]	-	-	-	-	-	GO:0004672//protein kinase activity;GO:0005524//ATP binding	GO:0006468//protein phosphorylation	--
Unigene0000219	0.484	1.199	0.815	1.294	1.679	1.04	--	-	-	-	-	-	-	-	-	--
Unigene0000220	29.941	32.136	36.712	9.851	19.722	18.413	PGIP2	XP_016579809.1 PREDICTED: polygalacturonase inhibitor-like [Capsicum annuum]	-	-	-	-	-	GO:0005515//protein binding	-	--
Unigene0000221	0.27	0.267	0	0	0	0	--	-	-	-	-	-	-	-	-	--
Unigene0000222	1.43	1.062	0.753	0	1.033	1.344	--	-	-	-	-	-	-	-	-	--
Unigene0000223	3.272	1.436	2.504	1.788	2.32	1.397	--	XP_016439530.1 PREDICTED: uncharacterized protein LOC107765405 [Nicotiana tabacum]	-	-	-	-	GO:0005575//cellular_component;GO:0005622//intracellular anatomical structure;GO:0005737//cytoplasm;GO:0009295//nucleoid	GO:0003674//molecular_function;GO:0003676//nucleic acid binding;GO:0003677//DNA binding;GO:0003924//GTPase activity;GO:0005488//binding;GO:0005515//protein binding;GO:0005525//GTP binding;GO:0051082//unfolded protein binding;GO:0097159//organic cyclic compound binding;GO:1901363//heterocyclic compound binding	GO:0006457//protein folding;GO:0008150//biological_process;GO:0009408//response to heat;GO:0009987//cellular process;GO:0042254//ribosome biogenesis	--
Unigene0000224	6.174	5.81	5.419	2.153	1.164	0.987	At1g80170	XP_009594191.1 probable polygalacturonase At1g80170 [Nicotiana tomentosiformis]	Metabolism;Metabolism	Global and overview maps;Carbohydrate metabolism	ko01100//Metabolic pathways;ko00040//Pentose and glucuronate interconversions	K01213;K01213	-	GO:0004650//polygalacturonase activity	GO:0005975//carbohydrate metabolic process	--
Unigene0000225	0	0.607	0.903	0.492	0.177	0	--	-	-	-	-	-	-	-	-	--
Unigene0000226	0.616	0.977	1.557	0.264	1.14	0.265	--	-	-	-	-	-	-	-	-	--
Unigene0000227	1.25	1.714	2.065	0.9	0.472	0.49	--	-	-	-	-	-	-	-	-	--
Unigene0000228	0	0	0	0	0	0.687	--	XP_016514716.1 PREDICTED: uncharacterized protein LOC107831463 [Nicotiana tabacum]	-	-	-	-	-	-	-	--
Unigene0000229	1.012	1.283	1.091	1.515	1.451	1.912	--	OIT00795.1 hypothetical protein A4A49_02061 [Nicotiana attenuata]	-	-	-	-	-	GO:0003964//RNA-directed DNA polymerase activity	GO:0000373//Group II intron splicing	--
Unigene0000230	0.698	0.173	0.735	9.189	6.203	6.418	CNL	XP_019247465.1 PREDICTED: butyrate--CoA ligase AAE11, peroxisomal-like [Nicotiana attenuata]	-	-	-	-	-	GO:0003987//acetate-CoA ligase activity;GO:0004043//L-aminoadipate-semialdehyde dehydrogenase activity;GO:0008668//(2,3-dihydroxybenzoyl)adenylate synthase activity;GO:0008756//o-succinylbenzoate-CoA ligase activity;GO:0030729//acetoacetate-CoA ligase activity;GO:0047473//D-alanine [D-alanyl carrier protein] ligase activity;GO:0050218//propionate-CoA ligase activity	GO:0009234//menaquinone biosynthetic process;GO:0019287//isopentenyl diphosphate biosynthetic process, mevalonate pathway;GO:0019290//siderophore biosynthetic process;GO:0019350//teichoic acid biosynthetic process;GO:0019427//acetyl-CoA biosynthetic process from acetate;GO:0019878//lysine biosynthetic process via aminoadipic acid	--
Unigene0000231	0	0.229	0.195	0	0	0	VPS39	KAF3683123.1 putative family protein-like [Capsicum annuum]	-	-	-	-	-	-	GO:0006886//intracellular protein transport;GO:0016192//vesicle-mediated transport	--
Unigene0000232	0.669	0.58	0.774	0.179	0.193	0	VPS39	KAE7999926.1 hypothetical protein FH972_004306 [Carpinus fangiana]	-	-	-	-	-	-	-	--
Unigene0000233	0.488	0.483	0.411	0	0.376	0.349	--	-	-	-	-	-	-	-	-	--
Unigene0000234	0	0	0	0	0	0.62	--	-	-	-	-	-	-	-	-	--
Unigene0000235	5.313	4.531	7.394	52.888	44.796	50.971	THA1	KAH0684545.1 hypothetical protein KY289_022297 [Solanum tuberosum]	Metabolism;Metabolism;Metabolism;Metabolism	Global and overview maps;Global and overview maps;Global and overview maps;Amino acid metabolism	ko01100//Metabolic pathways;ko01110//Biosynthesis of secondary metabolites;ko01230//Biosynthesis of amino acids;ko00260//Glycine, serine and threonine metabolism	K01620;K01620;K01620;K01620	GO:0005575//cellular_component;GO:0005622//intracellular anatomical structure;GO:0005737//cytoplasm;GO:0005829//cytosol	GO:0003674//molecular_function;GO:0003824//catalytic activity;GO:0004793//threonine aldolase activity;GO:0008483//transaminase activity;GO:0008710//8-amino-7-oxononanoate synthase activity;GO:0008732//L-allo-threonine aldolase activity;GO:0016829//lyase activity;GO:0016830//carbon-carbon lyase activity;GO:0016832//aldehyde-lyase activity;GO:0030170//pyridoxal phosphate binding	GO:0001505//regulation of neurotransmitter levels;GO:0006082//organic acid metabolic process;GO:0006520//cellular amino acid metabolic process;GO:0006544//glycine metabolic process;GO:0006545//glycine biosynthetic process;GO:0006566//threonine metabolic process;GO:0006567//threonine catabolic process;GO:0006807//nitrogen compound metabolic process;GO:0008150//biological_process;GO:0008152//metabo…	--
Unigene0000236	0.597	0.295	1.883	0.319	0	0.16	--	XP_016577241.1 PREDICTED: uncharacterized protein LOC107875138 [Capsicum annuum]	-	-	-	-	-	-	-	--
Unigene0000237	12.55	19.006	15.412	18.939	14.675	12.363	--	-	-	-	-	-	-	-	-	--
Unigene0000238	57.01	61.734	66.02	177.347	174.182	147.585	SDF2	KAH0703627.1 hypothetical protein KY285_017905 [Solanum tuberosum]	-	-	-	-	GO:0005575//cellular_component;GO:0005576//extracellular region;GO:0005622//intracellular anatomical structure;GO:0005737//cytoplasm;GO:0005783//endoplasmic reticulum;GO:0005789//endoplasmic reticulum membrane;GO:0012505//endomembrane system;GO:0016020//membrane;GO:0031984//organelle subcompartment;GO:0042175//nuclear outer membrane-endoplasmic reticulum membrane network;GO:0043226//organelle;GO:…	GO:0000030//mannosyltransferase activity;GO:0003674//molecular_function;GO:0003824//catalytic activity;GO:0004169//dolichyl-phosphate-mannose-protein mannosyltransferase activity;GO:0016740//transferase activity;GO:0016757//glycosyltransferase activity;GO:0016758//hexosyltransferase activity	GO:0002682//regulation of immune system process;GO:0002684//positive regulation of immune system process;GO:0006464//cellular protein modification process;GO:0006486//protein glycosylation;GO:0006493//protein O-linked glycosylation;GO:0006508//proteolysis;GO:0006515//protein quality control for misfolded or incompletely synthesized proteins;GO:0006807//nitrogen compound metabolic process;GO:00069…	--
Unigene0000239	0.657	0.434	1.72	2.964	2.193	2.35	--	KAF3665365.1 Stromal cell-derived factor 2-like protein [Capsicum annuum]	-	-	-	-	-	GO:0003723//RNA binding	-	--
Unigene0000240	1.716	2.831	2.132	3.056	2.832	2.894	--	-	-	-	-	-	-	-	-	--
Unigene0000241	1.755	1.117	1.451	1.809	2.174	2.355	PCMP-E4	XP_016545459.1 PREDICTED: pentatricopeptide repeat-containing protein At1g03540 isoform X1 [Capsicum annuum]	-	-	-	-	GO:0005575//cellular_component;GO:0005622//intracellular anatomical structure;GO:0043226//organelle;GO:0043227//membrane-bounded organelle;GO:0043229//intracellular organelle;GO:0043231//intracellular membrane-bounded organelle	GO:0003674//molecular_function;GO:0003676//nucleic acid binding;GO:0003723//RNA binding;GO:0003824//catalytic activity;GO:0004518//nuclease activity;GO:0004519//endonuclease activity;GO:0005488//binding;GO:0005515//protein binding;GO:0016787//hydrolase activity;GO:0016788//hydrolase activity, acting on ester bonds;GO:0097159//organic cyclic compound binding;GO:1901363//heterocyclic compound bindi…	GO:0006139//nucleobase-containing compound metabolic process;GO:0006725//cellular aromatic compound metabolic process;GO:0006807//nitrogen compound metabolic process;GO:0008150//biological_process;GO:0008152//metabolic process;GO:0009451//RNA modification;GO:0009987//cellular process;GO:0016070//RNA metabolic process;GO:0034641//cellular nitrogen compound metabolic process;GO:0043170//macromolecu…	--
Unigene0000242	78.21	91.665	89.276	163.939	164.635	130.635	--	-	-	-	-	-	-	-	-	--
Unigene0000243	0.384	0.634	1.294	0.959	1.185	0.413	--	KAF3625905.1 hypothetical protein FXO37_30611 [Capsicum annuum]	-	-	-	-	GO:0005575//cellular_component;GO:0005622//intracellular anatomical structure;GO:0005737//cytoplasm;GO:0009507//chloroplast;GO:0009534//chloroplast thylakoid;GO:0009535//chloroplast thylakoid membrane;GO:0009536//plastid;GO:0009579//thylakoid;GO:0016020//membrane;GO:0016021//integral component of membrane;GO:0031224//intrinsic component of membrane;GO:0031976//plastid thylakoid;GO:0031984//organe…	GO:0003674//molecular_function;GO:0003824//catalytic activity;GO:0003954//NADH dehydrogenase activity;GO:0005488//binding;GO:0008137//NADH dehydrogenase (ubiquinone) activity;GO:0016491//oxidoreductase activity;GO:0016651//oxidoreductase activity, acting on NAD(P)H;GO:0016655//oxidoreductase activity, acting on NAD(P)H, quinone or similar compound as acceptor;GO:0048038//quinone binding;GO:005013…	GO:0006091//generation of precursor metabolites and energy;GO:0006119//oxidative phosphorylation;GO:0006139//nucleobase-containing compound metabolic process;GO:0006163//purine nucleotide metabolic process;GO:0006725//cellular aromatic compound metabolic process;GO:0006753//nucleoside phosphate metabolic process;GO:0006793//phosphorus metabolic process;GO:0006796//phosphate-containing compound me…	--
Unigene0000244	0	0.022	0.112	43.274	50.256	41.599	At1g74360	KAG5602285.1 hypothetical protein H5410_033655 [Solanum commersonii]	-	-	-	-	-	GO:0004672//protein kinase activity;GO:0005515//protein binding;GO:0005524//ATP binding;GO:0016709//oxidoreductase activity, acting on paired donors, with incorporation or reduction of molecular oxygen, NAD(P)H as one donor, and incorporation of one atom of oxygen	GO:0006468//protein phosphorylation;GO:0006744//ubiquinone biosynthetic process;GO:0031412//gas vesicle organization	--
Unigene0000245	0	0.891	0	0	0	0	N	AKN63564.1 disease resistance protein N-like protein, partial [Nicotiana paniculata]	-	-	-	-	-	GO:0005515//protein binding;GO:0043531//ADP binding	GO:0007165//signal transduction	--
Unigene0000247	9.96	8.692	11.261	10.956	9.325	10.241	PSE1	XP_009588444.1 uncharacterized protein LOC104086014 [Nicotiana tomentosiformis]	-	-	-	-	GO:0005576//extracellular region	-	GO:0009755//hormone-mediated signaling pathway	--
Unigene0000249	1.84	2.59	3.017	0.104	0.504	0.676	--	KAH0775204.1 hypothetical protein KY290_012341 [Solanum tuberosum]	Environmental Information Processing;Environmental Information Processing	Signal transduction;Signal transduction	ko04075//Plant hormone signal transduction;ko04016//MAPK signaling pathway - plant	K14497;K14497	-	-	-	--
Unigene0000250	1.075	0.532	1.018	0	0.155	0.433	--	-	-	-	-	-	-	-	-	--
Unigene0000252	0	0.241	0	0	0	0	--	-	-	-	-	-	-	-	-	--
Unigene0000253	0	0	0	0.334	0	0.336	--	-	-	-	-	-	-	-	-	--
Unigene0000254	0.451	0.596	0.38	0	0.348	0	--	-	-	-	-	-	-	-	-	--
Unigene0000255	0	0	0	0	0	0.324	--	-	-	-	-	-	-	-	-	--
Unigene0000256	3.913	3.418	2.519	4.182	1.463	1.235	SBP1	QGZ12971.1 SPL1 [Lycium barbarum]	-	-	-	-	-	GO:0003677//DNA binding	-	SBP
Unigene0000257	0	0	0	0	2.315	0	--	-	-	-	-	-	-	-	-	--
Unigene0000258	0	0.777	0	0	0	0.562	--	-	-	-	-	-	-	-	-	--
Unigene0000259	0.268	0	0.338	0	0.464	0.144	--	-	-	-	-	-	-	-	-	--
Unigene0000260	0.453	0	0	0	0	0.243	--	-	-	-	-	-	-	-	-	--
Unigene0000261	2.226	2.16	3.136	6.217	6.301	5.804	At3g58860	XP_006366040.1 PREDICTED: F-box protein At4g22280-like [Solanum tuberosum]	-	-	-	-	-	GO:0005515//protein binding	-	--
Unigene0000262	0.558	0	0	0	1.612	0	PPIA	XP_001416738.1 Peptidyl-prolyl cis-trans isomerase, cyclophilin-type [Ostreococcus lucimarinus CCE9901]	-	-	-	-	-	GO:0003755//peptidyl-prolyl cis-trans isomerase activity	GO:0000413//protein peptidyl-prolyl isomerization	--
Unigene0000263	35.078	38.726	22.793	7.268	5.702	3.746	--	XP_019254756.1 PREDICTED: uncharacterized protein LOC109233359 [Nicotiana attenuata]	-	-	-	-	-	GO:0031072//heat shock protein binding;GO:0051082//unfolded protein binding	-	--
Unigene0000264	0.834	0.08	0.181	50.491	50.517	31.262	--	-	-	-	-	-	-	-	-	--
Unigene0000265	9.86	6.598	7.981	0.405	0.063	0	CRF4	XP_019240845.1 PREDICTED: ethylene-responsive transcription factor CRF2 [Nicotiana attenuata]	-	-	-	-	GO:0005575//cellular_component;GO:0005622//intracellular anatomical structure;GO:0005634//nucleus;GO:0005737//cytoplasm;GO:0043226//organelle;GO:0043227//membrane-bounded organelle;GO:0043229//intracellular organelle;GO:0043231//intracellular membrane-bounded organelle	GO:0003674//molecular_function;GO:0003676//nucleic acid binding;GO:0003677//DNA binding;GO:0003700//DNA-binding transcription factor activity;GO:0005488//binding;GO:0005515//protein binding;GO:0042802//identical protein binding;GO:0043565//sequence-specific DNA binding;GO:0097159//organic cyclic compound binding;GO:0140110//transcription regulator activity;GO:1901363//heterocyclic compound binding	GO:0000003//reproduction;GO:0000160//phosphorelay signal transduction system;GO:0003006//developmental process involved in reproduction;GO:0006139//nucleobase-containing compound metabolic process;GO:0006351//transcription, DNA-templated;GO:0006355//regulation of transcription, DNA-templated;GO:0006725//cellular aromatic compound metabolic process;GO:0006807//nitrogen compound metabolic process;G…	ERF
Unigene0000266	0.735	0.727	0.309	0.196	0.212	0	--	-	-	-	-	-	-	-	-	--
Unigene0000271	0.263	0.261	1.108	1.125	2.129	0	N	XP_015166429.1 PREDICTED: TMV resistance protein N-like [Solanum tuberosum]	-	-	-	-	-	-	-	--
Unigene0000273	66.354	58.075	72.767	23.659	21.468	25.278	DJ1B	XP_019245836.1 PREDICTED: protein DJ-1 homolog B-like [Nicotiana attenuata]	-	-	-	-	-	GO:0008234//cysteine-type peptidase activity	GO:0006508//proteolysis	--
Unigene0000274	7.715	7.849	10.143	10.563	11.971	11.346	At2g47020	XP_006342317.1 PREDICTED: peptide chain release factor 1 isoform X2 [Solanum tuberosum]	-	-	-	-	-	GO:0003747//translation release factor activity	GO:0006415//translational termination	--
Unigene0000275	6.349	5.122	6.462	2.908	3.397	3.678	--	-	-	-	-	-	-	-	-	--
Unigene0000276	0	0.331	0	0.357	0	0	--	-	-	-	-	-	-	-	-	--
Unigene0000278	1.121	0.555	1.038	0.36	0.907	0.361	--	-	-	-	-	-	-	-	-	--
Unigene0000280	1.448	1.792	2.895	0.58	0	0	--	-	-	-	-	-	-	-	-	--
Unigene0000281	5.455	3.192	6.575	2.385	1.648	2.728	--	-	-	-	-	-	-	-	-	--
Unigene0000282	5.28	6.598	7.201	2.662	2.931	2.772	ASHH3	KAG5569076.1 hypothetical protein H5410_058842 [Solanum commersonii]	-	-	-	-	GO:0005634//nucleus	GO:0005515//protein binding;GO:0018024//histone-lysine N-methyltransferase activity	-	--
Unigene0000283	2.169	2.4	2.685	2.182	2.506	2.739	ASHH3	XP_016443214.1 PREDICTED: histone-lysine N-methyltransferase ASHH3-like [Nicotiana tabacum]	-	-	-	-	GO:0005634//nucleus	GO:0005515//protein binding;GO:0018024//histone-lysine N-methyltransferase activity	-	--
Unigene0000284	0	0.58	0	0	0	0	--	-	-	-	-	-	-	-	-	--
Unigene0000285	1.53	2.298	2.975	2.143	2.073	2.661	CDKC-1	GAQ86098.1 Cdc2-related protein kinase [Klebsormidium nitens]	-	-	-	-	-	GO:0004672//protein kinase activity;GO:0005524//ATP binding	GO:0006468//protein phosphorylation	--
Unigene0000286	17.999	17.856	14.133	1.187	0.467	0.831	At3g03770	XP_006347714.1 PREDICTED: probable inactive leucine-rich repeat receptor-like protein kinase At3g03770 [Solanum tuberosum]	-	-	-	-	GO:0005575//cellular_component;GO:0005886//plasma membrane;GO:0016020//membrane;GO:0016021//integral component of membrane;GO:0031224//intrinsic component of membrane;GO:0071944//cell periphery	GO:0000166//nucleotide binding;GO:0003674//molecular_function;GO:0003824//catalytic activity;GO:0004672//protein kinase activity;GO:0005488//binding;GO:0005515//protein binding;GO:0005524//ATP binding;GO:0016301//kinase activity;GO:0016740//transferase activity;GO:0016772//transferase activity, transferring phosphorus-containing groups;GO:0016773//phosphotransferase activity, alcohol group as acc…	GO:0006464//cellular protein modification process;GO:0006468//protein phosphorylation;GO:0006793//phosphorus metabolic process;GO:0006796//phosphate-containing compound metabolic process;GO:0006807//nitrogen compound metabolic process;GO:0008150//biological_process;GO:0008152//metabolic process;GO:0009987//cellular process;GO:0016310//phosphorylation;GO:0019538//protein metabolic process;GO:00362…	--
Unigene0000287	6.688	6.622	7.22	0.86	1.038	1.662	--	-	-	-	-	-	-	-	-	--
Unigene0000288	12.222	7.053	9.744	3.028	2.619	1.912	--	KAG5626412.1 hypothetical protein H5410_011630, partial [Solanum commersonii]	-	-	-	-	-	-	-	--
Unigene0000289	8.54	6.812	9.565	1.222	0.895	1.168	--	KAE8681381.1 hypothetical protein F3Y22_tig00111330pilonHSYRG00457 [Hibiscus syriacus]	-	-	-	-	-	GO:0004540//ribonuclease activity	GO:0006397//mRNA processing	--
Unigene0000290	0	0.336	0	0	0.784	0	--	-	-	-	-	-	-	-	-	--
Unigene0000291	3.599	3.141	4.159	1.043	0.846	0.72	MORF5	PHU13449.1 Multiple organellar RNA editing factor 2, chloroplastic [Capsicum chinense]	-	-	-	-	-	-	-	--
Unigene0000292	260.931	273.671	259.052	102.518	69.785	97.588	MORF5	XP_009624175.1 multiple organellar RNA editing factor 2, chloroplastic-like [Nicotiana tomentosiformis]	-	-	-	-	-	-	-	--
Unigene0000295	0.303	0.3	1.02	0.809	0	0.488	--	KAH0634701.1 hypothetical protein KY284_037487 [Solanum tuberosum]	-	-	-	-	-	-	-	--
Unigene0000298	0.286	0.377	1.202	0.712	0.88	0.817	PPC1	XP_019250069.1 PREDICTED: phosphoenolpyruvate carboxylase-like [Nicotiana attenuata]	Metabolism;Metabolism;Metabolism;Metabolism	Global and overview maps;Global and overview maps;Carbohydrate metabolism;Energy metabolism	ko01100//Metabolic pathways;ko01200//Carbon metabolism;ko00620//Pyruvate metabolism;ko00710//Carbon fixation in photosynthetic organisms	K01595;K01595;K01595;K01595	-	GO:0008964//phosphoenolpyruvate carboxylase activity	GO:0006099//tricarboxylic acid cycle;GO:0015977//carbon fixation	--
Unigene0000299	1.666	1.903	2.588	1.643	1.481	1.375	--	KAG5593205.1 hypothetical protein H5410_043719 [Solanum commersonii]	-	-	-	-	-	GO:0005524//ATP binding;GO:0008134//transcription factor binding;GO:0042803//protein homodimerization activity;GO:0070840//dynein complex binding	GO:0007059//chromosome segregation;GO:0030261//chromosome condensation	--
Unigene0000300	5.991	7.091	6.598	6.259	5.7	6.068	Lema_P032730	XP_009603698.1 endoplasmic reticulum metallopeptidase 1 isoform X2 [Nicotiana tomentosiformis]	-	-	-	-	GO:0005575//cellular_component;GO:0005622//intracellular anatomical structure;GO:0005737//cytoplasm;GO:0005783//endoplasmic reticulum;GO:0005789//endoplasmic reticulum membrane;GO:0012505//endomembrane system;GO:0016020//membrane;GO:0016021//integral component of membrane;GO:0031224//intrinsic component of membrane;GO:0031984//organelle subcompartment;GO:0042175//nuclear outer membrane-endoplasmi…	GO:0003674//molecular_function;GO:0003824//catalytic activity;GO:0004180//carboxypeptidase activity;GO:0005488//binding;GO:0008233//peptidase activity;GO:0008237//metallopeptidase activity;GO:0016787//hydrolase activity;GO:0043167//ion binding;GO:0043169//cation binding;GO:0046872//metal ion binding;GO:0140096//catalytic activity, acting on a protein	GO:0006508//proteolysis;GO:0006807//nitrogen compound metabolic process;GO:0008150//biological_process;GO:0008152//metabolic process;GO:0019538//protein metabolic process;GO:0043170//macromolecule metabolic process;GO:0044238//primary metabolic process;GO:0071704//organic substance metabolic process;GO:1901564//organonitrogen compound metabolic process	--
Unigene0000301	0.355	0	0	0.38	0.822	0	--	-	-	-	-	-	-	-	-	--
Unigene0000303	0.744	0.842	1.88	0.227	0	0	--	-	-	-	-	-	-	-	-	--
Unigene0000304	0	1.305	1.11	0	0	0	--	-	-	-	-	-	-	-	-	--
Unigene0000305	1.497	0.741	0.945	1	0.433	1.004	--	-	-	-	-	-	-	-	-	--
Unigene0000306	14.891	14.679	16.64	18.559	21.378	17.706	EXOSC8	XP_015077338.1 exosome complex component RRP43-like [Solanum pennellii]	Genetic Information Processing	Folding, sorting and degradation	ko03018//RNA degradation	K12586	-	GO:0004549//tRNA-specific ribonuclease activity	GO:0008033//tRNA processing	--
Unigene0000307	4.732	4.145	3.983	4.215	5.749	4.852	PCMP-E77	XP_015159388.1 PREDICTED: pentatricopeptide repeat-containing protein At2g17210 [Solanum tuberosum]	-	-	-	-	GO:0005575//cellular_component;GO:0005622//intracellular anatomical structure;GO:0016020//membrane;GO:0043226//organelle;GO:0043227//membrane-bounded organelle;GO:0043229//intracellular organelle;GO:0043231//intracellular membrane-bounded organelle	GO:0003674//molecular_function;GO:0003676//nucleic acid binding;GO:0003723//RNA binding;GO:0003824//catalytic activity;GO:0004518//nuclease activity;GO:0004519//endonuclease activity;GO:0005488//binding;GO:0008199//ferric iron binding;GO:0015297//antiporter activity;GO:0016787//hydrolase activity;GO:0016788//hydrolase activity, acting on ester bonds;GO:0042910//xenobiotic transmembrane transporte…	GO:0006139//nucleobase-containing compound metabolic process;GO:0006725//cellular aromatic compound metabolic process;GO:0006807//nitrogen compound metabolic process;GO:0008150//biological_process;GO:0008152//metabolic process;GO:0009451//RNA modification;GO:0009987//cellular process;GO:0016070//RNA metabolic process;GO:0034641//cellular nitrogen compound metabolic process;GO:0043170//macromolecu…	--
Unigene0000308	0.928	0.735	0.781	0.198	0.429	0.598	--	-	-	-	-	-	-	-	-	--
Unigene0000309	0	0	0	0.624	0	0	--	-	-	-	-	-	-	-	-	--
Unigene0000310	0.915	0.965	1.218	0.41	0.375	0.317	--	-	-	-	-	-	-	-	-	--
Unigene0000311	8.284	6.389	8.493	13.385	14.188	14.704	UBP22	XP_009624129.1 ubiquitin C-terminal hydrolase 22 isoform X2 [Nicotiana tomentosiformis]	-	-	-	-	-	GO:0003674//molecular_function;GO:0003824//catalytic activity;GO:0004843//thiol-dependent deubiquitinase;GO:0005488//binding;GO:0008233//peptidase activity;GO:0008234//cysteine-type peptidase activity;GO:0008270//zinc ion binding;GO:0016787//hydrolase activity;GO:0019783//ubiquitin-like protein-specific protease activity;GO:0043167//ion binding;GO:0043169//cation binding;GO:0046872//metal ion bin…	GO:0006464//cellular protein modification process;GO:0006508//proteolysis;GO:0006511//ubiquitin-dependent protein catabolic process;GO:0006807//nitrogen compound metabolic process;GO:0008150//biological_process;GO:0008152//metabolic process;GO:0009056//catabolic process;GO:0009057//macromolecule catabolic process;GO:0009987//cellular process;GO:0016579//protein deubiquitination;GO:0019538//protei…	--
Unigene0000312	2.394	3.81	1.295	31.529	30.532	30.562	--	PHT33748.1 hypothetical protein CQW23_25548 [Capsicum baccatum]	-	-	-	-	-	-	-	--
Unigene0000313	0.1	0.198	0.588	0.747	1.384	0.643	--	-	-	-	-	-	-	-	-	--
Unigene0000314	0.355	0	0.149	0.758	0.82	0.19	--	-	-	-	-	-	-	-	-	--
Unigene0000315	0.775	1.687	0.913	0.911	2.059	1.996	--	-	-	-	-	-	-	-	-	--
Unigene0000316	1.425	1.239	2.281	1.746	0.482	3.692	--	-	-	-	-	-	-	-	-	--
Unigene0000317	5.929	8.276	6.765	5.765	5.036	6.096	--	-	-	-	-	-	-	-	-	--
Unigene0000318	1.804	0	0.868	1.377	0.596	0	--	-	-	-	-	-	-	-	-	--
Unigene0000319	0.361	0.894	1.977	0	0	0	--	-	-	-	-	-	-	-	-	--
Unigene0000320	1.188	0.392	0.834	0.212	0.687	1.276	--	-	-	-	-	-	-	-	-	--
Unigene0000321	0	0.288	0	0	1.009	0	--	-	-	-	-	-	-	-	-	--
Unigene0000322	0.039	0	0.13	14.857	23.65	18.734	LYSRS	XP_006349449.1 PREDICTED: lysine--tRNA ligase [Solanum tuberosum]	Genetic Information Processing	Translation	ko00970//Aminoacyl-tRNA biosynthesis	K04567	GO:0005575//cellular_component;GO:0005622//intracellular anatomical structure;GO:0005737//cytoplasm;GO:0009328//phenylalanine-tRNA ligase complex	GO:0000049//tRNA binding;GO:0000166//nucleotide binding;GO:0003674//molecular_function;GO:0003676//nucleic acid binding;GO:0003824//catalytic activity;GO:0004812//aminoacyl-tRNA ligase activity;GO:0004815//aspartate-tRNA ligase activity;GO:0004816//asparagine-tRNA ligase activity;GO:0004824//lysine-tRNA ligase activity;GO:0004826//phenylalanine-tRNA ligase activity;GO:0005488//binding;GO:0005524/…	GO:0006082//organic acid metabolic process;GO:0006139//nucleobase-containing compound metabolic process;GO:0006399//tRNA metabolic process;GO:0006412//translation;GO:0006418//tRNA aminoacylation for protein translation;GO:0006421//asparaginyl-tRNA aminoacylation;GO:0006422//aspartyl-tRNA aminoacylation;GO:0006430//lysyl-tRNA aminoacylation;GO:0006432//phenylalanyl-tRNA aminoacylation;GO:0006518//…	--
Unigene0000323	0	0	0	0	1.004	0	--	-	-	-	-	-	-	-	-	--
Unigene0000326	0.923	0.844	1.375	0	0.41	0.076	--	KAH0675418.1 hypothetical protein KY285_023219 [Solanum tuberosum]	-	-	-	-	-	-	-	--
Unigene0000327	0	0.601	0.34	0	0.701	0.217	--	-	-	-	-	-	-	-	-	--
Unigene0000328	0.302	0.299	0.508	0.323	0	0.324	--	-	-	-	-	-	-	-	-	--
Unigene0000329	14.32	13.372	16.602	12.832	20.068	12.564	OASB	KAG5626302.1 hypothetical protein H5410_011520, partial [Solanum commersonii]	Metabolism;Metabolism;Metabolism;Metabolism;Metabolism;Metabolism	Global and overview maps;Global and overview maps;Global and overview maps;Global and overview maps;Amino acid metabolism;Energy metabolism	ko01100//Metabolic pathways;ko01110//Biosynthesis of secondary metabolites;ko01200//Carbon metabolism;ko01230//Biosynthesis of amino acids;ko00270//Cysteine and methionine metabolism;ko00920//Sulfur metabolism	K01738;K01738;K01738;K01738;K01738;K01738	GO:0005575//cellular_component;GO:0005622//intracellular anatomical structure;GO:0005737//cytoplasm	GO:0003674//molecular_function;GO:0003824//catalytic activity;GO:0004122//cystathionine beta-synthase activity;GO:0004124//cysteine synthase activity;GO:0004794//L-threonine ammonia-lyase activity;GO:0008838//diaminopropionate ammonia-lyase activity;GO:0016740//transferase activity;GO:0016765//transferase activity, transferring alkyl or aryl (other than methyl) groups;GO:0016829//lyase activity;G…	GO:0000096//sulfur amino acid metabolic process;GO:0000097//sulfur amino acid biosynthetic process;GO:0006082//organic acid metabolic process;GO:0006520//cellular amino acid metabolic process;GO:0006534//cysteine metabolic process;GO:0006535//cysteine biosynthetic process from serine;GO:0006549//isoleucine metabolic process;GO:0006563//L-serine metabolic process;GO:0006790//sulfur compound metabo…	--
Unigene0000330	1.897	3.422	3.365	0.435	1.096	0.655	OASB	NP_001313068.1 cysteine synthase-like [Nicotiana tabacum]	Metabolism;Metabolism;Metabolism;Metabolism;Metabolism;Metabolism	Global and overview maps;Global and overview maps;Global and overview maps;Global and overview maps;Amino acid metabolism;Energy metabolism	ko01100//Metabolic pathways;ko01110//Biosynthesis of secondary metabolites;ko01200//Carbon metabolism;ko01230//Biosynthesis of amino acids;ko00270//Cysteine and methionine metabolism;ko00920//Sulfur metabolism	K01738;K01738;K01738;K01738;K01738;K01738	GO:0005575//cellular_component;GO:0005622//intracellular anatomical structure;GO:0005737//cytoplasm	GO:0003674//molecular_function;GO:0003824//catalytic activity;GO:0004122//cystathionine beta-synthase activity;GO:0004124//cysteine synthase activity;GO:0004794//L-threonine ammonia-lyase activity;GO:0008838//diaminopropionate ammonia-lyase activity;GO:0016740//transferase activity;GO:0016765//transferase activity, transferring alkyl or aryl (other than methyl) groups;GO:0016829//lyase activity;G…	GO:0000096//sulfur amino acid metabolic process;GO:0000097//sulfur amino acid biosynthetic process;GO:0006082//organic acid metabolic process;GO:0006520//cellular amino acid metabolic process;GO:0006534//cysteine metabolic process;GO:0006535//cysteine biosynthetic process from serine;GO:0006549//isoleucine metabolic process;GO:0006563//L-serine metabolic process;GO:0006790//sulfur compound metabo…	--
Unigene0000331	2.086	0.435	2.125	0.117	0	0.236	--	-	-	-	-	-	-	-	-	--
Unigene0000332	2.827	0.477	1.352	6.421	5.161	3.414	At4g27290	PHU20633.1 G-type lectin S-receptor-like serine/threonine-protein kinase [Capsicum chinense]	-	-	-	-	-	GO:0004672//protein kinase activity;GO:0004674//protein serine/threonine kinase activity;GO:0005524//ATP binding	GO:0006468//protein phosphorylation;GO:0048544//recognition of pollen	--
Unigene0000333	0	0	0.215	1.092	0.886	0	SD11	XP_009777836.1 PREDICTED: G-type lectin S-receptor-like serine/threonine-protein kinase At4g27290 isoform X1 [Nicotiana sylvestris]	-	-	-	-	-	GO:0004672//protein kinase activity;GO:0004674//protein serine/threonine kinase activity;GO:0005524//ATP binding	GO:0006468//protein phosphorylation;GO:0048544//recognition of pollen	--
Unigene0000334	0.265	0	0	0	0.306	0	SD11	XP_009777836.1 PREDICTED: G-type lectin S-receptor-like serine/threonine-protein kinase At4g27290 isoform X1 [Nicotiana sylvestris]	-	-	-	-	-	GO:0004672//protein kinase activity;GO:0004674//protein serine/threonine kinase activity;GO:0005524//ATP binding	GO:0006468//protein phosphorylation;GO:0048544//recognition of pollen	--
Unigene0000335	0	0	0.242	4.003	2.663	0.928	At4g27290	PHU20621.1 G-type lectin S-receptor-like serine/threonine-protein kinase [Capsicum chinense]	-	-	-	-	-	GO:0004672//protein kinase activity;GO:0005524//ATP binding	GO:0006468//protein phosphorylation	--
Unigene0000336	23.372	10.577	30.588	116.324	163.969	198.264	UGT84A24	BAG80540.1 UDP-glucose:glucosyltransferase [Lycium barbarum]	-	-	-	-	-	GO:0008194//UDP-glycosyltransferase activity	-	--
Unigene0000338	0.065	0.516	0.055	0.905	2.332	1.817	--	KAH0692518.1 hypothetical protein KY285_019615 [Solanum tuberosum]	-	-	-	-	-	-	-	--
Unigene0000339	0	0	0.575	0	0.79	0	--	-	-	-	-	-	-	-	-	--
Unigene0000340	0	0.474	0.537	0.511	0	0	--	-	-	-	-	-	-	-	-	--
Unigene0000341	40.925	47.349	43.773	32.78	33.686	33.386	rib5	AHF22111.1 riboflavin synthase [Lycium chinense]	Metabolism;Metabolism;Metabolism	Global and overview maps;Global and overview maps;Metabolism of cofactors and vitamins	ko01100//Metabolic pathways;ko01110//Biosynthesis of secondary metabolites;ko00740//Riboflavin metabolism	K00793;K00793;K00793	GO:0005575//cellular_component	GO:0003674//molecular_function;GO:0003824//catalytic activity;GO:0004746//riboflavin synthase activity;GO:0016740//transferase activity;GO:0016765//transferase activity, transferring alkyl or aryl (other than methyl) groups	GO:0006766//vitamin metabolic process;GO:0006767//water-soluble vitamin metabolic process;GO:0006771//riboflavin metabolic process;GO:0006807//nitrogen compound metabolic process;GO:0008150//biological_process;GO:0008152//metabolic process;GO:0009058//biosynthetic process;GO:0009110//vitamin biosynthetic process;GO:0009231//riboflavin biosynthetic process;GO:0009987//cellular process;GO:0018130//…	--
Unigene0000342	1.148	1.137	0.43	0	0.295	0.274	--	KAH0697184.1 hypothetical protein KY289_014666 [Solanum tuberosum]	-	-	-	-	GO:0016021//integral component of membrane	-	GO:0016192//vesicle-mediated transport	--
Unigene0000343	0	0.994	0.169	0	0	0	--	-	-	-	-	-	-	GO:0015558//secondary active p-aminobenzoyl-glutamate transmembrane transporter activity	GO:1902604//p-aminobenzoyl-glutamate transmembrane transport	--
Unigene0000344	1.129	0.746	2.43	1.207	1.508	1.509	--	KAF3668342.1 Synaptotagmin-4 [Capsicum annuum]	-	-	-	-	-	-	-	--
Unigene0000345	6.573	4.995	6.859	9.368	13.057	13.525	PARP2	XP_015159901.1 PREDICTED: poly [ADP-ribose] polymerase 2-like isoform X3 [Solanum tuberosum]	Genetic Information Processing	Replication and repair	ko03410//Base excision repair	K10798	-	GO:0003950//NAD+ ADP-ribosyltransferase activity	GO:0006471//protein ADP-ribosylation	--
Unigene0000346	0.338	2.508	0	0	0	0	--	-	-	-	-	-	-	-	-	--
Unigene0000347	0.628	0.373	0.423	2.416	0	0.539	--	-	-	-	-	-	-	-	-	--
Unigene0000348	9.841	6.403	6.627	6.011	5.849	3.773	N	XP_016496149.1 PREDICTED: TMV resistance protein N-like [Nicotiana tabacum]	-	-	-	-	-	GO:0005515//protein binding;GO:0043531//ADP binding	GO:0007165//signal transduction	--
Unigene0000349	3.999	1.742	4.983	4.446	1.664	3.091	N	XP_016434904.1 PREDICTED: TMV resistance protein N-like [Nicotiana tabacum]	-	-	-	-	-	GO:0005515//protein binding	-	--
Unigene0000350	4.473	4.832	4.023	2.391	2.82	3.274	N	AKN63580.1 disease resistance protein N-like protein, partial [Nicotiana undulata]	-	-	-	-	-	GO:0005515//protein binding	-	--
Unigene0000351	22.47	22.318	24.374	23.574	12.584	10.237	At1g34300	XP_004234010.1 G-type lectin S-receptor-like serine/threonine-protein kinase At1g34300 [Solanum lycopersicum]	-	-	-	-	-	GO:0004672//protein kinase activity;GO:0005524//ATP binding	GO:0006468//protein phosphorylation;GO:0048544//recognition of pollen	--
Unigene0000352	0	0	0	1.951	0	0.56	--	-	-	-	-	-	-	-	-	--
Unigene0000353	0.498	0.592	0.838	0.639	0.806	0.855	--	-	-	-	-	-	-	-	-	--
Unigene0000354	23.711	25.414	26.268	33.084	30.374	32.098	ERDJ2A	XP_004234196.1 dnaJ protein ERDJ2A [Solanum lycopersicum]	Genetic Information Processing;Genetic Information Processing	Folding, sorting and degradation;Folding, sorting and degradation	ko04141//Protein processing in endoplasmic reticulum;ko03060//Protein export	K09540;K09540	GO:0005575//cellular_component;GO:0005622//intracellular anatomical structure;GO:0005737//cytoplasm;GO:0005783//endoplasmic reticulum;GO:0005789//endoplasmic reticulum membrane;GO:0012505//endomembrane system;GO:0016020//membrane;GO:0016021//integral component of membrane;GO:0030176//integral component of endoplasmic reticulum membrane;GO:0031224//intrinsic component of membrane;GO:0031227//intri…	GO:0005515//protein binding	GO:0001655//urogenital system development;GO:0001889//liver development;GO:0006457//protein folding;GO:0006605//protein targeting;GO:0006612//protein targeting to membrane;GO:0006613//cotranslational protein targeting to membrane;GO:0006614//SRP-dependent cotranslational protein targeting to membrane;GO:0006620//posttranslational protein targeting to endoplasmic reticulum membrane;GO:0006807//nit…	--
Unigene0000357	0.383	0	0	0.41	0	0.206	--	-	-	-	-	-	-	-	-	--
Unigene0000358	17.646	11.839	21.449	7.492	8.577	7.612	--	KAG5627331.1 hypothetical protein H5410_012549 [Solanum commersonii]	-	-	-	-	GO:0005615//extracellular space;GO:0005815//microtubule organizing center	-	GO:0010506//regulation of autophagy	--
Unigene0000359	0	0	0	0.492	1.065	0.33	--	-	-	-	-	-	-	-	-	--
Unigene0000360	17.65	23.823	19.369	109.943	119.116	103.646	TOM20	KAG5621785.1 hypothetical protein H5410_007003 [Solanum commersonii]	-	-	-	-	-	-	-	--
Unigene0000361	29.263	29.418	30.793	86.687	101.255	88.398	TOM20	XP_006338697.1 PREDICTED: mitochondrial import receptor subunit TOM20-like [Solanum tuberosum]	-	-	-	-	-	-	-	--
Unigene0000362	5.795	5.034	4.878	4.347	4.818	5.566	TOM20	KAG5621785.1 hypothetical protein H5410_007003 [Solanum commersonii]	-	-	-	-	-	GO:0005515//protein binding	-	--
Unigene0000363	17.989	17.904	18.483	79.183	88.44	101.754	CIPK6	XP_009596060.1 CBL-interacting serine/threonine-protein kinase 6-like [Nicotiana tomentosiformis]	-	-	-	-	-	GO:0004672//protein kinase activity;GO:0005524//ATP binding;GO:0016709//oxidoreductase activity, acting on paired donors, with incorporation or reduction of molecular oxygen, NAD(P)H as one donor, and incorporation of one atom of oxygen	GO:0006468//protein phosphorylation;GO:0006744//ubiquinone biosynthetic process;GO:0007165//signal transduction	--
Unigene0000364	5.542	4.145	5.311	8.697	10.835	8.798	GEBPL	KAG5612682.1 hypothetical protein H5410_023963 [Solanum commersonii]	-	-	-	-	-	-	GO:0006355//regulation of transcription, DNA-templated	GeBP
Unigene0000365	0.402	0	0.113	0.859	1.858	0.144	--	-	-	-	-	-	-	-	-	--
Unigene0000366	4.764	8.822	5.602	3.421	3.572	3.357	At4g23740	PHU23200.1 putative inactive receptor kinase [Capsicum chinense]	-	-	-	-	GO:0005575//cellular_component;GO:0005886//plasma membrane;GO:0016020//membrane;GO:0016021//integral component of membrane;GO:0031224//intrinsic component of membrane;GO:0071944//cell periphery	GO:0000166//nucleotide binding;GO:0003674//molecular_function;GO:0003824//catalytic activity;GO:0004672//protein kinase activity;GO:0005488//binding;GO:0005515//protein binding;GO:0005524//ATP binding;GO:0016301//kinase activity;GO:0016740//transferase activity;GO:0016772//transferase activity, transferring phosphorus-containing groups;GO:0016773//phosphotransferase activity, alcohol group as acc…	GO:0006464//cellular protein modification process;GO:0006468//protein phosphorylation;GO:0006793//phosphorus metabolic process;GO:0006796//phosphate-containing compound metabolic process;GO:0006807//nitrogen compound metabolic process;GO:0008150//biological_process;GO:0008152//metabolic process;GO:0009987//cellular process;GO:0016310//phosphorylation;GO:0019538//protein metabolic process;GO:00362…	--
Unigene0000367	0	0	0	0.444	0	0	SHM4	POF19614.1 serine hydroxymethyltransferase 4 [Quercus suber]	Metabolism;Metabolism;Metabolism;Metabolism;Metabolism;Metabolism;Metabolism;Metabolism	Global and overview maps;Global and overview maps;Global and overview maps;Global and overview maps;Carbohydrate metabolism;Amino acid metabolism;Metabolism of other amino acids;Metabolism of cofactors and vitamins	ko01100//Metabolic pathways;ko01110//Biosynthesis of secondary metabolites;ko01200//Carbon metabolism;ko01230//Biosynthesis of amino acids;ko00630//Glyoxylate and dicarboxylate metabolism;ko00260//Glycine, serine and threonine metabolism;ko00460//Cyanoamino acid metabolism;ko00670//One carbon pool by folate	K00600;K00600;K00600;K00600;K00600;K00600;K00600;K00600	-	-	-	--
Unigene0000368	0	0	0.054	17.282	12.332	11.385	ACA7	XP_016512477.1 PREDICTED: alpha carbonic anhydrase 7-like [Nicotiana tabacum]	Metabolism;Metabolism	Global and overview maps;Energy metabolism	ko01100//Metabolic pathways;ko00910//Nitrogen metabolism	K01674;K01674	-	-	-	--
Unigene0000369	0	0	0	0	0.449	0	AAP6	KAH0695333.1 hypothetical protein KY285_022430 [Solanum tuberosum]	-	-	-	-	-	GO:0008175//tRNA methyltransferase activity	-	--
Unigene0000370	0.439	0.217	0	0	0.253	0	AAP6	XP_016449434.1 PREDICTED: amino acid permease 6-like [Nicotiana tabacum]	-	-	-	-	-	-	-	--
Unigene0000371	3.335	3.222	2.841	7.386	9.519	9.876	METTL6	KAH0646630.1 hypothetical protein KY284_034514 [Solanum tuberosum]	-	-	-	-	-	GO:0000179//rRNA (adenine-N6,N6-)-dimethyltransferase activity;GO:0008168//methyltransferase activity;GO:0008171//O-methyltransferase activity;GO:0008173//RNA methyltransferase activity;GO:0008276//protein methyltransferase activity;GO:0008689//3-demethylubiquinone-9 3-O-methyltransferase activity;GO:0008757//S-adenosylmethionine-dependent methyltransferase activity;GO:0046025//precorrin-6Y C5,15…	GO:0000154//rRNA modification;GO:0006400//tRNA modification;GO:0006412//translation;GO:0006464//cellular protein modification process;GO:0006744//ubiquinone biosynthetic process;GO:0008152//metabolic process;GO:0009102//biotin biosynthetic process;GO:0015995//chlorophyll biosynthetic process;GO:0016051//carbohydrate biosynthetic process;GO:0018364//peptidyl-glutamine methylation;GO:0042245//RNA r…	--
Unigene0000372	3.469	3.153	4.193	2.016	2.344	2.769	--	XP_015158439.1 PREDICTED: uncharacterized protein LOC107057881 [Solanum tuberosum]	-	-	-	-	-	-	-	--
Unigene0000373	0.259	0.128	0.545	0.138	0.299	0.556	--	-	-	-	-	-	-	-	-	--
Unigene0000374	0	0	0	0	0	0.797	--	-	-	-	-	-	-	-	-	--
Unigene0000375	4.945	3.3	5.339	2.643	2.733	2.885	--	XP_004245532.1 uncharacterized protein LOC101261732 [Solanum lycopersicum]	-	-	-	-	-	-	-	--
Unigene0000376	2.427	2.259	2.819	3.684	3.702	5.106	--	KAG5612285.1 hypothetical protein H5410_023566 [Solanum commersonii]	-	-	-	-	-	-	-	--
Unigene0000377	0	0.402	0	0	0	0	--	-	-	-	-	-	-	-	-	--
Unigene0000379	1.902	1.376	1.108	5.239	6.848	5.026	--	KAG5591911.1 hypothetical protein H5410_042425 [Solanum commersonii]	-	-	-	-	-	-	-	--
Unigene0000380	0	0	0	0.275	0	0	--	-	-	-	-	-	-	-	-	--
Unigene0000381	1.112	0.367	1.435	0.238	0.343	0.239	--	-	-	-	-	-	-	-	-	--
Unigene0000382	0.239	0	0.402	1.402	1.103	0.64	--	-	-	-	-	-	-	-	-	--
Unigene0000383	16.778	12.28	7.267	5.718	5.621	7.961	OMT3	XP_006366298.1 PREDICTED: trans-resveratrol di-O-methyltransferase-like [Solanum tuberosum]	-	-	-	-	-	GO:0008168//methyltransferase activity;GO:0008171//O-methyltransferase activity;GO:0008276//protein methyltransferase activity;GO:0008757//S-adenosylmethionine-dependent methyltransferase activity;GO:0046025//precorrin-6Y C5,15-methyltransferase (decarboxylating) activity	GO:0006412//translation;GO:0008152//metabolic process;GO:0008299//isoprenoid biosynthetic process;GO:0016051//carbohydrate biosynthetic process;GO:0018364//peptidyl-glutamine methylation;GO:0046140//corrin biosynthetic process	--
Unigene0000384	0.597	0.946	0.101	0.255	0.138	1.026	--	-	-	-	-	-	-	-	-	--
Unigene0000385	0.294	0.583	0.124	0.315	0	0.158	--	-	-	-	-	-	-	-	-	--
Unigene0000386	2.111	2.715	3.184	0.505	0.947	0.643	--	PHU30847.1 hypothetical protein BC332_02940 [Capsicum chinense]	-	-	-	-	-	-	-	--
Unigene0000387	1.358	1.067	2.105	1.164	0.959	1.122	Tf2-12	KAH0639137.1 hypothetical protein KY285_035723 [Solanum tuberosum]	-	-	-	-	-	GO:0003676//nucleic acid binding;GO:0008270//zinc ion binding	GO:0015074//DNA integration	--
Unigene0000388	0.384	0	0	0	1.554	0.618	RPP13	KAH0692350.1 hypothetical protein KY285_019447 [Solanum tuberosum]	-	-	-	-	-	GO:0043531//ADP binding	-	--
Unigene0000389	3.157	2.939	3.296	2.7	1.387	1.966	--	XP_019236411.1 PREDICTED: uncharacterized protein LOC109216685 [Nicotiana attenuata]	-	-	-	-	-	-	-	--
Unigene0000390	13.941	15.216	18.792	29.416	26.93	27.592	--	KAF3658345.1 putative cytochrome c oxidase subunit 6a, mitochondrial-like [Capsicum annuum]	-	-	-	-	GO:0005575//cellular_component;GO:0005622//intracellular anatomical structure;GO:0005856//cytoskeleton;GO:0043226//organelle;GO:0043228//non-membrane-bounded organelle;GO:0043229//intracellular organelle;GO:0043232//intracellular non-membrane-bounded organelle	-	-	--
Unigene0000391	6.62	7.695	7.451	20.844	31.186	25.877	--	XP_019251772.1 PREDICTED: RNA-binding protein 25 [Nicotiana attenuata]	-	-	-	-	-	-	GO:0009236//cobalamin biosynthetic process	--
Unigene0000392	1.026	1.44	1.044	1.6	2.471	2.938	PCMP-E67	XP_006360219.1 PREDICTED: pentatricopeptide repeat-containing protein DOT4, chloroplastic-like [Solanum tuberosum]	-	-	-	-	-	-	-	--
Unigene0000393	26.777	22.756	25.867	15.215	16.431	20.41	AHK3	XP_009612281.1 histidine kinase 3 isoform X1 [Nicotiana tomentosiformis]	Environmental Information Processing	Signal transduction	ko04075//Plant hormone signal transduction	K14489	GO:0005575//cellular_component;GO:0005622//intracellular anatomical structure;GO:0005737//cytoplasm;GO:0005783//endoplasmic reticulum;GO:0005789//endoplasmic reticulum membrane;GO:0005886//plasma membrane;GO:0012505//endomembrane system;GO:0016020//membrane;GO:0016021//integral component of membrane;GO:0031224//intrinsic component of membrane;GO:0031984//organelle subcompartment;GO:0042175//nucle…	GO:0000155//phosphorelay sensor kinase activity;GO:0000156//phosphorelay response regulator activity;GO:0003674//molecular_function;GO:0003677//DNA binding;GO:0003700//DNA-binding transcription factor activity;GO:0003824//catalytic activity;GO:0004672//protein kinase activity;GO:0004673//protein histidine kinase activity;GO:0004888//transmembrane signaling receptor activity;GO:0005488//binding;GO…	GO:0000160//phosphorelay signal transduction system;GO:0001101//response to acid chemical;GO:0006139//nucleobase-containing compound metabolic process;GO:0006355//regulation of transcription, DNA-templated;GO:0006464//cellular protein modification process;GO:0006468//protein phosphorylation;GO:0006725//cellular aromatic compound metabolic process;GO:0006793//phosphorus metabolic process;GO:000679…	--
Unigene0000394	1.522	1.808	1.195	0	0	0	--	-	-	-	-	-	-	-	-	--
Unigene0000395	0.469	0	0.197	0	0	0	--	-	-	-	-	-	-	-	-	--
Unigene0000396	0	0.613	0.521	0.221	0	0	--	-	-	-	-	-	-	-	-	--
Unigene0000397	0	0	0.383	0.365	0.263	0.978	--	KAG5589475.1 hypothetical protein H5410_039989 [Solanum commersonii]	-	-	-	-	-	-	-	--
Unigene0000398	1.057	0.262	0.445	0.848	0.458	0.851	--	XP_018631173.1 uncharacterized protein LOC108947539 [Nicotiana tomentosiformis]	-	-	-	-	-	-	-	--
Unigene0000399	1.244	0.352	0.598	10.068	12.734	7.822	--	XP_016487311.1 PREDICTED: uncharacterized protein LOC107807446 [Nicotiana tabacum]	-	-	-	-	-	-	-	--
Unigene0000400	0	0	0.24	0	0	0	--	-	-	-	-	-	-	-	-	--
Unigene0000401	1.544	1.223	0.975	0	0	0	--	-	-	-	-	-	-	-	-	--
Unigene0000402	0	0	0.514	0	0.235	0	--	-	-	-	-	-	-	-	-	--
Unigene0000403	55.939	26.017	52.014	14.314	16.359	19.425	fggy	XP_006366181.2 PREDICTED: FGGY carbohydrate kinase domain-containing protein [Solanum tuberosum]	-	-	-	-	-	GO:0003674//molecular_function;GO:0003824//catalytic activity;GO:0004370//glycerol kinase activity;GO:0004856//xylulokinase activity;GO:0005515//protein binding;GO:0008737//L-fuculokinase activity;GO:0008741//ribulokinase activity;GO:0016301//kinase activity;GO:0016740//transferase activity;GO:0016772//transferase activity, transferring phosphorus-containing groups;GO:0016773//phosphotransferase …	GO:0005975//carbohydrate metabolic process;GO:0005997//xylulose metabolic process;GO:0006071//glycerol metabolic process;GO:0006793//phosphorus metabolic process;GO:0006796//phosphate-containing compound metabolic process;GO:0008150//biological_process;GO:0008152//metabolic process;GO:0009255//Entner-Doudoroff pathway through 6-phosphogluconate;GO:0009987//cellular process;GO:0016310//phosphoryla…	--
Unigene0000405	0	0	0.234	0	0	0	--	-	-	-	-	-	-	-	-	--
Unigene0000406	0.902	0.563	1.751	1.09	0.703	0.737	--	XP_019248623.1 PREDICTED: uncharacterized protein LOC109227885 [Nicotiana attenuata]	-	-	-	-	-	-	-	--
Unigene0000407	1.009	1.499	1.558	0	0	1.083	--	-	-	-	-	-	-	-	-	--
Unigene0000408	6.373	4.037	5.531	5.035	4.3	4.674	PTPMT1	XP_016473225.1 PREDICTED: putative dual specificity protein phosphatase DSP8 [Nicotiana tabacum]	-	-	-	-	-	-	-	--
Unigene0000410	59.245	73.815	71.061	259.314	253.937	287.441	HOP2	XP_016568921.1 PREDICTED: hsp70-Hsp90 organizing protein 2-like [Capsicum annuum]	-	-	-	-	GO:0000145//exocyst;GO:0045203//integral component of cell outer membrane	GO:0005215//transporter activity;GO:0005515//protein binding	GO:0006904//vesicle docking involved in exocytosis;GO:0015774//polysaccharide transport;GO:0042710//biofilm formation	--
Unigene0000411	0.617	0.489	1.559	0	0	0	--	-	-	-	-	-	-	-	-	--
Unigene0000412	0.423	1.397	1.187	0	0	0	--	-	-	-	-	-	-	GO:0003953//NAD+ nucleosidase activity	-	--
Unigene0000414	0	0	0.645	0	0	0	--	-	-	-	-	-	-	-	-	--
Unigene0000415	28.468	22.36	43.353	21.616	15.555	23.879	NLP8	XP_006352200.1 PREDICTED: protein NLP9-like [Solanum tuberosum]	-	-	-	-	-	GO:0005515//protein binding	-	Nin-like
Unigene0000416	0.329	0.109	1.109	0	0.127	0.707	--	-	-	-	-	-	-	-	-	--
Unigene0000418	10.347	8.377	12.848	10.998	11.363	16.63	--	PHT54114.1 hypothetical protein CQW23_08576 [Capsicum baccatum]	-	-	-	-	GO:0000142//cellular bud neck contractile ring;GO:0000151//ubiquitin ligase complex;GO:0005575//cellular_component;GO:0005622//intracellular anatomical structure;GO:0005634//nucleus;GO:0005737//cytoplasm;GO:0005826//actomyosin contractile ring;GO:0005856//cytoskeleton;GO:0005933//cellular bud;GO:0005935//cellular bud neck;GO:0005938//cell cortex;GO:0015629//actin cytoskeleton;GO:0016020//membrane…	GO:0003674//molecular_function;GO:0005488//binding;GO:0005515//protein binding;GO:0030674//protein-macromolecule adaptor activity;GO:0060090//molecular adaptor activity	GO:0000003//reproduction;GO:0000082//G1/S transition of mitotic cell cycle;GO:0000209//protein polyubiquitination;GO:0000278//mitotic cell cycle;GO:0000749//response to pheromone triggering conjugation with cellular fusion;GO:0000751//mitotic cell cycle G1 arrest in response to pheromone;GO:0003006//developmental process involved in reproduction;GO:0005975//carbohydrate metabolic process;GO:00059…	--
Unigene0000419	18.051	8.453	8.096	201.194	306.513	258.089	LE16	PHT70239.1 Non-specific lipid-transfer protein 2 [Capsicum annuum]	-	-	-	-	-	-	-	--
Unigene0000420	0	0	0.327	0	0	0	--	KAG5569005.1 hypothetical protein H5410_063965 [Solanum commersonii]	-	-	-	-	-	-	-	--
Unigene0000421	5.114	3.376	4.39	0.643	1.275	0.861	TULP2	XP_019267680.1 PREDICTED: tubby-like F-box protein 5 [Nicotiana attenuata]	-	-	-	-	-	GO:0005515//protein binding	-	--
Unigene0000422	0.268	0.265	0.226	0.573	0.464	0.144	TULP2	XP_009786613.1 PREDICTED: tubby-like F-box protein 5 [Nicotiana sylvestris]	-	-	-	-	-	GO:0005515//protein binding	-	--
Unigene0000423	0.45	0.892	0.126	0.482	0.174	0	--	-	-	-	-	-	-	-	-	--
Unigene0000426	0.188	0.372	0	0.402	0.434	0.202	--	-	-	-	-	-	-	-	-	--
Unigene0000427	6.848	7.415	6.973	13.487	14.82	13.765	RBR1	KAH0637401.1 hypothetical protein KY289_037316 [Solanum tuberosum]	-	-	-	-	GO:0000228//nuclear chromosome;GO:0000307//cyclin-dependent protein kinase holoenzyme complex;GO:0000785//chromatin;GO:0005575//cellular_component;GO:0005622//intracellular anatomical structure;GO:0005634//nucleus;GO:0005654//nucleoplasm;GO:0005667//transcription regulator complex;GO:0005694//chromosome;GO:0005737//cytoplasm;GO:0005819//spindle;GO:0005829//cytosol;GO:0005856//cytoskeleton;GO:0008…	GO:0000976//transcription cis-regulatory region binding;GO:0000987//cis-regulatory region sequence-specific DNA binding;GO:0001067//transcription regulatory region nucleic acid binding;GO:0003674//molecular_function;GO:0003676//nucleic acid binding;GO:0003677//DNA binding;GO:0003690//double-stranded DNA binding;GO:0003700//DNA-binding transcription factor activity;GO:0003712//transcription coregu…	GO:0000003//reproduction;GO:0000070//mitotic sister chromatid segregation;GO:0000075//cell cycle checkpoint signaling;GO:0000082//G1/S transition of mitotic cell cycle;GO:0000083//regulation of transcription involved in G1/S transition of mitotic cell cycle;GO:0000122//negative regulation of transcription by RNA polymerase II;GO:0000278//mitotic cell cycle;GO:0000280//nuclear division;GO:0000819/…	--
Unigene0000428	1.174	0.634	0.988	0.228	0	0.344	--	XP_019254690.1 PREDICTED: protein DETOXIFICATION 44, chloroplastic isoform X1 [Nicotiana attenuata]	-	-	-	-	-	-	-	--
Unigene0000430	2.557	2.311	2.994	4.218	3.554	3.818	--	KAF3629661.1 hypothetical protein FXO37_28837 [Capsicum annuum]	-	-	-	-	-	-	-	--
Unigene0000431	0	0.46	0.913	0.497	0.537	0.665	NMAT3	XP_009763877.1 PREDICTED: uncharacterized protein LOC104215716 [Nicotiana sylvestris]	-	-	-	-	GO:0005575//cellular_component;GO:0005622//intracellular anatomical structure;GO:0005737//cytoplasm;GO:0005739//mitochondrion;GO:0016020//membrane;GO:0016021//integral component of membrane;GO:0031224//intrinsic component of membrane;GO:0043226//organelle;GO:0043227//membrane-bounded organelle;GO:0043229//intracellular organelle;GO:0043231//intracellular membrane-bounded organelle	GO:0003674//molecular_function;GO:0003676//nucleic acid binding;GO:0003677//DNA binding;GO:0003824//catalytic activity;GO:0003964//RNA-directed DNA polymerase activity;GO:0004129//cytochrome-c oxidase activity;GO:0004518//nuclease activity;GO:0004519//endonuclease activity;GO:0005215//transporter activity;GO:0005488//binding;GO:0008324//cation transmembrane transporter activity;GO:0009055//electr…	GO:0000373//Group II intron splicing;GO:0000375//RNA splicing, via transesterification reactions;GO:0000377//RNA splicing, via transesterification reactions with bulged adenosine as nucleophile;GO:0000959//mitochondrial RNA metabolic process;GO:0000963//mitochondrial RNA processing;GO:0006091//generation of precursor metabolites and energy;GO:0006139//nucleobase-containing compound metabolic proc…	--
Unigene0000432	3.286	3.06	2.964	0.878	1.13	0.546	CYP734A1	XP_009588775.1 cytochrome P450 734A1 [Nicotiana tomentosiformis]	Metabolism;Metabolism	Global and overview maps;Metabolism of terpenoids and polyketides	ko01110//Biosynthesis of secondary metabolites;ko00905//Brassinosteroid biosynthesis	K15639;K15639	GO:0005575//cellular_component;GO:0016020//membrane;GO:0016021//integral component of membrane;GO:0031224//intrinsic component of membrane	GO:0003674//molecular_function;GO:0003824//catalytic activity;GO:0004497//monooxygenase activity;GO:0005488//binding;GO:0005506//iron ion binding;GO:0008395//steroid hydroxylase activity;GO:0016491//oxidoreductase activity;GO:0016705//oxidoreductase activity, acting on paired donors, with incorporation or reduction of molecular oxygen;GO:0020037//heme binding;GO:0043167//ion binding;GO:0043169//c…	GO:0006629//lipid metabolic process;GO:0008150//biological_process;GO:0008152//metabolic process;GO:0008202//steroid metabolic process;GO:0009719//response to endogenous stimulus;GO:0009725//response to hormone;GO:0009741//response to brassinosteroid;GO:0010033//response to organic substance;GO:0010268//brassinosteroid homeostasis;GO:0010817//regulation of hormone levels;GO:0014070//response to o…	--
Unigene0000433	2.133	1.975	2.565	2.28	2.497	1.754	--	XP_016464990.1 PREDICTED: uncharacterized protein LOC107787889 [Nicotiana tabacum]	-	-	-	-	-	GO:0003676//nucleic acid binding;GO:0004523//RNA-DNA hybrid ribonuclease activity	-	--
Unigene0000434	1.352	0.089	0.076	7.611	4.062	5.902	--	KAG5582269.1 hypothetical protein H5410_052896 [Solanum commersonii]	Organismal Systems	Environmental adaptation	ko04626//Plant-pathogen interaction	K13459	-	GO:0005515//protein binding;GO:0043531//ADP binding	-	--
Unigene0000435	2.593	1.457	2.241	0.599	0.837	0.802	--	KAH0709195.1 hypothetical protein KY284_010622 [Solanum tuberosum]	-	-	-	-	-	GO:0003964//RNA-directed DNA polymerase activity	GO:0000373//Group II intron splicing	--
Unigene0000436	0.357	0	0	0	0	0	--	-	-	-	-	-	-	-	-	--
Unigene0000437	0.71	0.843	1.075	0	0	0.152	--	KAH0685678.1 hypothetical protein KY284_016231 [Solanum tuberosum]	-	-	-	-	-	-	-	--
Unigene0000438	2.784	2.757	3.482	2.976	1.563	2.818	RPL6	XP_019253160.1 PREDICTED: uncharacterized protein LOC109231993 [Nicotiana attenuata]	Genetic Information Processing	Translation	ko03010//Ribosome	K02933	GO:0005840//ribosome;GO:0022625//cytosolic large ribosomal subunit	GO:0003735//structural constituent of ribosome;GO:0019843//rRNA binding	GO:0006412//translation	--
Unigene0000439	0	0.288	0.245	0.311	1.009	0.625	--	-	-	-	-	-	-	-	-	--
Unigene0000440	3.909	3	4.36	13.579	13.779	19.512	RCE2	XP_006363136.1 PREDICTED: probable NEDD8-conjugating enzyme Ubc12-like [Solanum tuberosum]	Genetic Information Processing	Folding, sorting and degradation	ko04120//Ubiquitin mediated proteolysis	K10579	GO:0005575//cellular_component;GO:0005622//intracellular anatomical structure;GO:0005737//cytoplasm	GO:0000166//nucleotide binding;GO:0003674//molecular_function;GO:0003824//catalytic activity;GO:0005488//binding;GO:0005524//ATP binding;GO:0016740//transferase activity;GO:0017076//purine nucleotide binding;GO:0019787//ubiquitin-like protein transferase activity;GO:0019788//NEDD8 transferase activity;GO:0030554//adenyl nucleotide binding;GO:0032553//ribonucleotide binding;GO:0032555//purine ribo…	GO:0006464//cellular protein modification process;GO:0006807//nitrogen compound metabolic process;GO:0008150//biological_process;GO:0008152//metabolic process;GO:0009719//response to endogenous stimulus;GO:0009725//response to hormone;GO:0009733//response to auxin;GO:0009987//cellular process;GO:0010033//response to organic substance;GO:0019538//protein metabolic process;GO:0032446//protein modif…	--
Unigene0000441	15.465	12.997	14.932	8.266	7.487	9.138	--	KAH0759770.1 hypothetical protein KY290_023263 [Solanum tuberosum]	-	-	-	-	-	-	-	--
Unigene0000442	0.67	0	0	0	0	0	--	-	-	-	-	-	-	-	-	--
Unigene0000443	0	0	0	0	0.3	0.278	--	-	-	-	-	-	-	-	-	--
Unigene0000444	0.789	0.893	0.949	1.024	0.521	0.908	--	-	-	-	-	-	-	-	-	--
Unigene0000445	0.866	0.39	0.464	0.168	0.364	0.084	RE2	ABI34342.1 Polyprotein, putative [Solanum demissum]	-	-	-	-	-	-	GO:0015074//DNA integration	--
Unigene0000446	0	0	0.55	0	0	0	--	ABI34342.1 Polyprotein, putative [Solanum demissum]	-	-	-	-	GO:0005575//cellular_component;GO:0005622//intracellular anatomical structure;GO:0005737//cytoplasm;GO:0005829//cytosol;GO:0005832//chaperonin-containing T-complex;GO:0005886//plasma membrane;GO:0005911//cell-cell junction;GO:0009506//plasmodesma;GO:0016020//membrane;GO:0030054//cell junction;GO:0032991//protein-containing complex;GO:0055044//symplast;GO:0071944//cell periphery;GO:0101031//chaper…	GO:0000166//nucleotide binding;GO:0003674//molecular_function;GO:0005488//binding;GO:0005515//protein binding;GO:0005524//ATP binding;GO:0016746//acyltransferase activity;GO:0016887//ATP hydrolysis activity;GO:0017076//purine nucleotide binding;GO:0030554//adenyl nucleotide binding;GO:0032553//ribonucleotide binding;GO:0032555//purine ribonucleotide binding;GO:0032559//adenyl ribonucleotide bindi…	GO:0006457//protein folding;GO:0006458//'de novo' protein folding;GO:0008150//biological_process;GO:0009987//cellular process;GO:0061077//chaperone-mediated protein folding	--
Unigene0000447	0.496	0.197	0.334	0.424	0	0.107	CCMFN2	PHT80128.1 putative cytochrome c biosynthesis protein [Capsicum annuum]	-	-	-	-	-	GO:0005085//guanyl-nucleotide exchange factor activity	GO:0006364//rRNA processing;GO:0008033//tRNA processing	--
Unigene0000450	4.769	5.716	6.17	7.834	8.122	6.628	TIF1	XP_009603910.1 eukaryotic initiation factor 4A-I [Nicotiana tomentosiformis]	-	-	-	-	-	-	-	--
Unigene0000451	1.619	1.107	1.883	0.371	0.223	0.828	--	-	-	-	-	-	-	-	-	--
Unigene0000452	2.226	2.288	2.511	2.649	2.888	1.601	Os03g0184500	KAG5625149.1 hypothetical protein H5410_010367 [Solanum commersonii]	-	-	-	-	-	GO:0003677//DNA binding	-	B3
Unigene0000453	0	0	0.221	0	0	0	--	-	-	-	-	-	-	-	-	--
Unigene0000454	0.23	0	0	0.246	0.266	0	--	-	-	-	-	-	GO:0005840//ribosome	GO:0003735//structural constituent of ribosome	GO:0006412//translation	--
Unigene0000455	2.665	3.173	3.209	36.816	19.728	19.193	LECRK3	XP_016514847.1 PREDICTED: G-type lectin S-receptor-like serine/threonine-protein kinase RLK1 [Nicotiana tabacum]	-	-	-	-	-	GO:0004672//protein kinase activity;GO:0005524//ATP binding	GO:0006468//protein phosphorylation;GO:0048544//recognition of pollen	--
Unigene0000456	12.95	11.272	11.561	14.848	19.071	14.687	--	XP_006346450.1 PREDICTED: putative nuclease HARBI1 [Solanum tuberosum]	-	-	-	-	-	GO:0016788//hydrolase activity, acting on ester bonds	-	--
Unigene0000457	0.167	0.165	0.701	0	0.193	0	CHUP1	XP_019256880.1 PREDICTED: protein CHUP1, chloroplastic [Nicotiana attenuata]	-	-	-	-	-	-	-	--
Unigene0000458	112.12	115.918	110.02	44.696	32.898	40.58	CHUP1	KAH0671764.1 hypothetical protein KY284_022851 [Solanum tuberosum]	-	-	-	-	-	GO:0005524//ATP binding	GO:0007059//chromosome segregation;GO:0030261//chromosome condensation	--
Unigene0000459	0	0	0	0	0.267	0.745	--	-	-	-	-	-	-	-	-	--
Unigene0000460	0.338	1.505	0	0	0	0	--	XP_016471099.1 PREDICTED: uncharacterized protein LOC107793286 [Nicotiana tabacum]	-	-	-	-	-	-	-	--
Unigene0000461	0.503	1.21	0.787	0.154	0	0	TY3B-G	KAH0632496.1 hypothetical protein KY284_035282 [Solanum tuberosum]	-	-	-	-	-	GO:0046332//SMAD binding	-	--
Unigene0000462	1.141	0.924	0.698	0	0.12	0	--	XP_026459427.1 uncharacterized protein LOC113360095 [Papaver somniferum]	-	-	-	-	-	-	-	--
Unigene0000463	0.468	0.348	0.394	0.375	0.135	0.44	YKT61	KZV29613.1 hypothetical protein F511_00891 [Dorcoceras hygrometricum]	Genetic Information Processing	Folding, sorting and degradation	ko04130//SNARE interactions in vesicular transport	K08516	GO:0016021//integral component of membrane	-	GO:0016192//vesicle-mediated transport	--
Unigene0000464	12.173	13.453	13.541	26.431	22.485	20.01	YKT61	TMW96912.1 hypothetical protein EJD97_006566 [Solanum chilense]	Genetic Information Processing	Folding, sorting and degradation	ko04130//SNARE interactions in vesicular transport	K08516	GO:0016021//integral component of membrane	-	GO:0016192//vesicle-mediated transport	--
Unigene0000465	0.536	0.398	0	0.573	0.31	0.288	--	-	-	-	-	-	-	-	-	--
Unigene0000466	2.877	2.935	3.963	2.516	5.038	4.773	At1g17410	XP_006361335.1 PREDICTED: probable nucleoside diphosphate kinase 5 [Solanum tuberosum]	-	-	-	-	GO:0005575//cellular_component;GO:0005622//intracellular anatomical structure;GO:0005737//cytoplasm;GO:0005739//mitochondrion;GO:0043226//organelle;GO:0043227//membrane-bounded organelle;GO:0043229//intracellular organelle;GO:0043231//intracellular membrane-bounded organelle	GO:0000166//nucleotide binding;GO:0003674//molecular_function;GO:0003824//catalytic activity;GO:0004550//nucleoside diphosphate kinase activity;GO:0005488//binding;GO:0005524//ATP binding;GO:0009973//adenylyl-sulfate reductase activity;GO:0016301//kinase activity;GO:0016740//transferase activity;GO:0016772//transferase activity, transferring phosphorus-containing groups;GO:0016776//phosphotransfe…	GO:0006139//nucleobase-containing compound metabolic process;GO:0006163//purine nucleotide metabolic process;GO:0006164//purine nucleotide biosynthetic process;GO:0006165//nucleoside diphosphate phosphorylation;GO:0006183//GTP biosynthetic process;GO:0006213//pyrimidine nucleoside metabolic process;GO:0006220//pyrimidine nucleotide metabolic process;GO:0006221//pyrimidine nucleotide biosynthetic …	--
Unigene0000467	0	0	1.369	0	0	0	--	-	-	-	-	-	-	-	-	--
Unigene0000468	0.2	0.33	0.365	16.006	13.992	15.932	--	XP_009601784.1 uncharacterized protein LOC104097000 isoform X2 [Nicotiana tomentosiformis]	-	-	-	-	-	-	-	--
Unigene0000469	0.044	0	0.111	1.126	1.826	2.449	--	-	-	-	-	-	-	-	-	--
Unigene0000471	0	0.194	0	0.42	0.681	0	--	-	-	-	-	-	-	-	-	--
Unigene0000473	1.847	0	0	0	0	0	--	-	-	-	-	-	-	-	-	--
Unigene0000474	1.393	0.852	2.274	0.919	2.704	0.979	RE1	CAN76196.1 hypothetical protein VITISV_041073 [Vitis vinifera]	-	-	-	-	-	-	GO:0015074//DNA integration	--
Unigene0000475	1.556	1.387	2.315	2.274	2.159	1.559	FER	KAH0716775.1 hypothetical protein KY285_012806 [Solanum tuberosum]	-	-	-	-	-	GO:0004672//protein kinase activity;GO:0005524//ATP binding	GO:0006468//protein phosphorylation	--
Unigene0000479	0.766	0.379	0.323	0.205	0	0.206	--	-	-	-	-	-	-	-	-	--
Unigene0000480	0.712	0.201	1.712	0.217	0.588	0.109	--	-	-	-	-	-	-	-	-	--
Unigene0000482	1.729	1.759	3.29	3.52	5.53	3.738	NPF1.2	KAH0705161.1 hypothetical protein KY289_010237 [Solanum tuberosum]	-	-	-	-	GO:0005575//cellular_component;GO:0016020//membrane;GO:0016021//integral component of membrane;GO:0031224//intrinsic component of membrane	GO:0003674//molecular_function;GO:0005215//transporter activity;GO:0022857//transmembrane transporter activity	GO:0006810//transport;GO:0008150//biological_process;GO:0051179//localization;GO:0051234//establishment of localization;GO:0055085//transmembrane transport	--
Unigene0000483	7.718	9.895	8.617	19.105	16.525	18.053	LSM1B	XP_004241918.1 sm-like protein LSM1B [Solanum lycopersicum]	Genetic Information Processing	Folding, sorting and degradation	ko03018//RNA degradation	K12620	-	-	-	--
Unigene0000484	0	2.447	0	0	0	0	--	-	-	-	-	-	GO:0005575//cellular_component;GO:0005622//intracellular anatomical structure;GO:0005737//cytoplasm	GO:0003674//molecular_function;GO:0005488//binding;GO:0043167//ion binding;GO:0043169//cation binding;GO:0046872//metal ion binding;GO:0046914//transition metal ion binding	GO:0006810//transport;GO:0006811//ion transport;GO:0006812//cation transport;GO:0006873//cellular ion homeostasis;GO:0006875//cellular metal ion homeostasis;GO:0008150//biological_process;GO:0009987//cellular process;GO:0019725//cellular homeostasis;GO:0030001//metal ion transport;GO:0030003//cellular cation homeostasis;GO:0042592//homeostatic process;GO:0046916//cellular transition metal ion hom…	--
Unigene0000486	0.622	0	0	1.552	0	0	--	-	-	-	-	-	-	-	-	--
Unigene0000487	1.251	0.929	0.395	4.097	4.249	3.526	BBX19	XP_015066178.1 B-box zinc finger protein 19-like [Solanum pennellii]	-	-	-	-	-	GO:0008270//zinc ion binding	-	DBB
Unigene0000488	0	0	0	3.527	5.312	5.44	--	-	-	-	-	-	-	GO:0008289//lipid binding	-	--
Unigene0000489	0.363	0.36	0.918	0.194	0.21	1.171	--	-	-	-	-	-	-	-	-	--
Unigene0000490	0.126	0.25	0.957	0.405	0.292	1.085	--	-	-	-	-	-	GO:0016021//integral component of membrane	GO:0008233//peptidase activity;GO:0010181//FMN binding;GO:0016491//oxidoreductase activity	GO:0009372//quorum sensing	--
Unigene0000491	2.198	2.392	2.888	2.195	2.457	2.1	--	XP_015059444.1 uncharacterized protein LOC107005378 isoform X1 [Solanum pennellii]	-	-	-	-	-	-	-	--
Unigene0000492	5.397	5.07	2.388	0.296	0.8	0.297	ANN3	XP_016538408.1 PREDICTED: annexin D3-like isoform X1 [Capsicum annuum]	-	-	-	-	-	GO:0005509//calcium ion binding;GO:0005544//calcium-dependent phospholipid binding	-	--
Unigene0000494	0.993	0.656	0.836	0.973	0.478	0.533	--	-	-	-	-	-	-	-	-	--
Unigene0000495	24.271	21.82	26.494	19.508	16.788	22.99	ECH2	XP_019251008.1 PREDICTED: enoyl-CoA hydratase 2, peroxisomal [Nicotiana attenuata]	-	-	-	-	-	-	-	--
Unigene0000496	2.785	2.928	3.932	35.59	30.211	28.152	RVE1	KAH0696263.1 hypothetical protein KY289_013745 [Solanum tuberosum]	-	-	-	-	GO:0005575//cellular_component;GO:0005622//intracellular anatomical structure;GO:0005634//nucleus;GO:0043226//organelle;GO:0043227//membrane-bounded organelle;GO:0043229//intracellular organelle;GO:0043231//intracellular membrane-bounded organelle	GO:0003674//molecular_function;GO:0003676//nucleic acid binding;GO:0003677//DNA binding;GO:0005488//binding;GO:0097159//organic cyclic compound binding;GO:1901363//heterocyclic compound binding	GO:0006139//nucleobase-containing compound metabolic process;GO:0006351//transcription, DNA-templated;GO:0006355//regulation of transcription, DNA-templated;GO:0006725//cellular aromatic compound metabolic process;GO:0006807//nitrogen compound metabolic process;GO:0008150//biological_process;GO:0008152//metabolic process;GO:0009058//biosynthetic process;GO:0009059//macromolecule biosynthetic proc…	MYB_related
Unigene0000497	0	0	0	0.761	0.658	0.153	--	-	-	-	-	-	-	-	-	--
Unigene0000498	0.244	0.386	0.246	3.281	5.519	3.4	RVE1	PHT90829.1 Protein REVEILLE 2 [Capsicum annuum]	-	-	-	-	-	-	-	--
Unigene0000499	0	0	0.7	0	0	0	--	-	-	-	-	-	-	-	-	--
Unigene0000500	8.107	7.202	7.759	2.611	3.273	2.861	--	PHT65237.1 OTU domain-containing protein [Capsicum annuum]	-	-	-	-	-	-	-	--
Unigene0000501	0	0.181	0.77	0.195	0	0.393	--	-	-	-	-	-	-	-	-	--
Unigene0000502	0.377	0.373	0	0	0	0	--	-	-	-	-	-	-	-	-	--
Unigene0000503	4.771	5.471	6.976	4.027	4.741	2.965	--	-	-	-	-	-	-	-	-	--
Unigene0000504	0.844	1.144	1.122	0.665	0.462	0.62	--	KAH0671252.1 hypothetical protein KY289_025745 [Solanum tuberosum]	-	-	-	-	-	-	-	--
Unigene0000505	25.313	17.967	23.516	17.382	17.942	19.039	RMR2	XP_006361369.1 PREDICTED: receptor homology region, transmembrane domain- and RING domain-containing protein 2 [Solanum tuberosum]	-	-	-	-	GO:0005680//anaphase-promoting complex	GO:0008270//zinc ion binding;GO:0046872//metal ion binding;GO:0061630//ubiquitin protein ligase activity;GO:0097602//cullin family protein binding	GO:0031145//anaphase-promoting complex-dependent catabolic process	--
Unigene0000506	5.003	7.574	6.265	9.988	12.949	12.25	ICP55	XP_016538827.1 PREDICTED: probable Xaa-Pro aminopeptidase 3 [Capsicum annuum]	-	-	-	-	GO:0005575//cellular_component;GO:0005622//intracellular anatomical structure;GO:0005634//nucleus;GO:0005737//cytoplasm;GO:0005739//mitochondrion;GO:0043226//organelle;GO:0043227//membrane-bounded organelle;GO:0043229//intracellular organelle;GO:0043231//intracellular membrane-bounded organelle	GO:0003674//molecular_function;GO:0003824//catalytic activity;GO:0004177//aminopeptidase activity;GO:0005488//binding;GO:0008233//peptidase activity;GO:0008237//metallopeptidase activity;GO:0008238//exopeptidase activity;GO:0016787//hydrolase activity;GO:0030145//manganese ion binding;GO:0043167//ion binding;GO:0043169//cation binding;GO:0046872//metal ion binding;GO:0046914//transition metal ion…	GO:0006508//proteolysis;GO:0006807//nitrogen compound metabolic process;GO:0008150//biological_process;GO:0008152//metabolic process;GO:0019538//protein metabolic process;GO:0031647//regulation of protein stability;GO:0043170//macromolecule metabolic process;GO:0044238//primary metabolic process;GO:0050821//protein stabilization;GO:0065007//biological regulation;GO:0065008//regulation of biologic…	--
Unigene0000507	1.426	1.027	0.873	0.416	0	0.139	--	-	-	-	-	-	-	-	-	--
Unigene0000509	0.48	1.267	0	0	0	0	--	-	-	-	-	-	-	-	-	--
Unigene0000510	2.433	1.643	2.234	0.236	0	0	--	KAH0668886.1 hypothetical protein KY289_023379 [Solanum tuberosum]	-	-	-	-	-	-	-	--
Unigene0000511	0.342	0.847	0.144	0	0.198	0.735	--	-	-	-	-	-	-	-	-	--
Unigene0000512	1.505	2.058	3.197	2.911	3.976	3.923	BHLH80	XP_009788006.1 PREDICTED: transcription factor bHLH80-like isoform X1 [Nicotiana sylvestris]	-	-	-	-	-	GO:0008929//methylglyoxal synthase activity;GO:0046983//protein dimerization activity	GO:0006007//glucose catabolic process;GO:0019242//methylglyoxal biosynthetic process	bHLH
Unigene0000513	67.761	67.75	74.69	277.28	297.99	227.965	TFT6	NP_001275062.1 14-3-3-like protein 16R [Solanum tuberosum]	-	-	-	-	-	GO:0003674//molecular_function;GO:0005488//binding;GO:0005515//protein binding;GO:0019904//protein domain specific binding;GO:0022857//transmembrane transporter activity	-	--
Unigene0000514	121.063	128.875	105.788	30.888	25.721	28.518	--	XP_006353458.1 PREDICTED: uncharacterized protein LOC102593492 [Solanum tuberosum]	-	-	-	-	-	-	-	--
Unigene0000515	8.508	6.365	7.499	4.162	3.699	5.153	At2g17140	XP_009628450.1 pentatricopeptide repeat-containing protein At2g17140 [Nicotiana tomentosiformis]	-	-	-	-	GO:0005575//cellular_component;GO:0005622//intracellular anatomical structure;GO:0043226//organelle;GO:0043227//membrane-bounded organelle;GO:0043229//intracellular organelle;GO:0043231//intracellular membrane-bounded organelle;GO:1990904//ribonucleoprotein complex	GO:0003674//molecular_function;GO:0003676//nucleic acid binding;GO:0003723//RNA binding;GO:0003824//catalytic activity;GO:0004518//nuclease activity;GO:0004519//endonuclease activity;GO:0005488//binding;GO:0016787//hydrolase activity;GO:0016788//hydrolase activity, acting on ester bonds;GO:0045182//translation regulator activity;GO:0097159//organic cyclic compound binding;GO:1901363//heterocyclic…	GO:0000372//Group I intron splicing;GO:0006139//nucleobase-containing compound metabolic process;GO:0006417//regulation of translation;GO:0006725//cellular aromatic compound metabolic process;GO:0006807//nitrogen compound metabolic process;GO:0006886//intracellular protein transport;GO:0008150//biological_process;GO:0008152//metabolic process;GO:0009451//RNA modification;GO:0009987//cellular proc…	--
Unigene0000516	109.423	106.808	112.397	413.413	429.772	418.683	HDT1	XP_006349079.1 PREDICTED: histone deacetylase HDT2 [Solanum tuberosum]	-	-	-	-	-	-	-	--
Unigene0000518	0	0.429	0	0	1.001	0.232	--	-	-	-	-	-	-	-	-	--
Unigene0000519	17.716	19.817	18.334	4.734	2.81	3.325	ROPGEF1	KAG5624725.1 hypothetical protein H5410_009943 [Solanum commersonii]	-	-	-	-	GO:0005575//cellular_component;GO:0005622//intracellular anatomical structure;GO:0005737//cytoplasm;GO:0005829//cytosol;GO:0005886//plasma membrane;GO:0016020//membrane;GO:0016324//apical plasma membrane;GO:0045177//apical part of cell;GO:0071944//cell periphery;GO:0098590//plasma membrane region	GO:0003674//molecular_function;GO:0005085//guanyl-nucleotide exchange factor activity;GO:0005488//binding;GO:0005515//protein binding;GO:0019899//enzyme binding;GO:0031267//small GTPase binding;GO:0051020//GTPase binding;GO:0098772//molecular function regulator	GO:0000003//reproduction;GO:0000902//cell morphogenesis;GO:0000904//cell morphogenesis involved in differentiation;GO:0001558//regulation of cell growth;GO:0003006//developmental process involved in reproduction;GO:0008150//biological_process;GO:0009653//anatomical structure morphogenesis;GO:0009826//unidimensional cell growth;GO:0009856//pollination;GO:0009860//pollen tube growth;GO:0009932//cel…	--
Unigene0000520	5.328	5.402	4.968	9.582	9.328	9.315	--	-	-	-	-	-	-	-	-	--
Unigene0000521	0	0	0.3	0	0	0	--	-	-	-	-	-	-	-	-	--
Unigene0000522	0.743	0.074	0.75	0.476	0.429	0.558	pol	KAH0693109.1 hypothetical protein KY285_020206 [Solanum tuberosum]	-	-	-	-	-	GO:0004190//aspartic-type endopeptidase activity	GO:0006508//proteolysis;GO:0008150//biological_process	--
Unigene0000523	0.253	0.167	1.422	0.271	0.39	0.997	--	XP_019232536.1 PREDICTED: uncharacterized protein LOC109213221 [Nicotiana attenuata]	-	-	-	-	GO:0000775//chromosome, centromeric region	-	-	--
Unigene0000524	0.436	0	0	0.233	0	0	pol	KAH0693109.1 hypothetical protein KY285_020206 [Solanum tuberosum]	-	-	-	-	-	-	-	--
Unigene0000526	0.414	1.434	0.348	0.442	0	0	--	-	-	-	-	-	-	-	-	--
Unigene0000527	4.481	4.646	4.177	2.572	1.599	2.066	--	KAG5622583.1 hypothetical protein H5410_007801 [Solanum commersonii]	-	-	-	-	-	-	GO:0009236//cobalamin biosynthetic process	--
Unigene0000528	0.463	0	0.195	0.247	0.267	0	--	-	-	-	-	-	-	-	-	--
Unigene0000529	1.695	0	0.357	0	0	0	--	-	-	-	-	-	-	-	-	--
Unigene0000530	1.44	1.307	1.616	1.026	1.456	0.258	TLP1	XP_016560503.1 PREDICTED: pathogenesis-related protein 5-like isoform X1 [Capsicum annuum]	-	-	-	-	GO:0016020//membrane	-	-	--
Unigene0000531	25.709	23.845	28.439	38.518	44.49	45.303	R3hdm2	KAH0714357.1 hypothetical protein KY284_007262 [Solanum tuberosum]	-	-	-	-	GO:0005575//cellular_component;GO:0005622//intracellular anatomical structure;GO:0005634//nucleus;GO:0043226//organelle;GO:0043227//membrane-bounded organelle;GO:0043229//intracellular organelle;GO:0043231//intracellular membrane-bounded organelle	GO:0003674//molecular_function;GO:0003676//nucleic acid binding;GO:0005488//binding;GO:0097159//organic cyclic compound binding;GO:1901363//heterocyclic compound binding	-	--
Unigene0000532	33.265	34.794	39.679	83.648	86	84.193	At1g62020	KAG5613398.1 hypothetical protein H5410_024679 [Solanum commersonii]	-	-	-	-	GO:0030117//membrane coat;GO:0030126//COPI vesicle coat	GO:0005198//structural molecule activity;GO:0005515//protein binding	GO:0006886//intracellular protein transport;GO:0016192//vesicle-mediated transport	--
Unigene0000534	0	0	0.776	3.38	8.528	7.213	--	-	-	-	-	-	-	-	-	--
Unigene0000535	0	0	0	0	0.58	0	--	KAH0660217.1 hypothetical protein KY289_028965 [Solanum tuberosum]	-	-	-	-	-	-	-	--
Unigene0000536	0.239	0	0	0.639	0.553	0.514	--	KAH0708676.1 hypothetical protein KY284_010103 [Solanum tuberosum]	-	-	-	-	-	-	GO:0019058//viral life cycle	--
Unigene0000537	1.526	0.824	1.11	1.854	1.483	1.75	Tf2-11	KAH0708676.1 hypothetical protein KY284_010103 [Solanum tuberosum]	-	-	-	-	-	-	GO:0015074//DNA integration	--
Unigene0000538	0	0	0	0.886	0.639	0	--	-	-	-	-	-	-	-	-	--
Unigene0000539	0	0	0	0.26	0.563	0	--	KAH0765156.1 hypothetical protein KY285_001027 [Solanum tuberosum]	-	-	-	-	-	-	-	--
Unigene0000540	4.015	9.893	6.21	4.591	5.935	5.212	GINS2	XP_006345965.1 PREDICTED: DNA replication complex GINS protein PSF2 [Solanum tuberosum]	-	-	-	-	GO:0000228//nuclear chromosome;GO:0000811//GINS complex;GO:0005575//cellular_component;GO:0005622//intracellular anatomical structure;GO:0005634//nucleus;GO:0005654//nucleoplasm;GO:0005657//replication fork;GO:0005694//chromosome;GO:0031261//DNA replication preinitiation complex;GO:0031298//replication fork protection complex;GO:0031974//membrane-enclosed lumen;GO:0031981//nuclear lumen;GO:003299…	-	GO:0000278//mitotic cell cycle;GO:0000724//double-strand break repair via homologous recombination;GO:0000725//recombinational repair;GO:0000727//double-strand break repair via break-induced replication;GO:0006139//nucleobase-containing compound metabolic process;GO:0006259//DNA metabolic process;GO:0006260//DNA replication;GO:0006261//DNA-dependent DNA replication;GO:0006270//DNA replication ini…	--
Unigene0000541	1.941	1.302	0.791	0	0	0	BAT1	KAF3668846.1 Amino-acid permease BAT1 [Capsicum annuum]	-	-	-	-	GO:0016020//membrane	GO:0022857//transmembrane transporter activity	GO:0055085//transmembrane transport	--
Unigene0000542	0.7	1.079	0.917	0.582	0.539	1.42	--	-	-	-	-	-	-	-	-	--
Unigene0000543	2.12	2.099	0.691	5.848	15.649	9.396	HMT-2	KAG5587870.1 hypothetical protein H5410_048304 [Solanum commersonii]	Metabolism;Metabolism;Metabolism	Global and overview maps;Global and overview maps;Amino acid metabolism	ko01100//Metabolic pathways;ko01110//Biosynthesis of secondary metabolites;ko00270//Cysteine and methionine metabolism	K00547;K00547;K00547	GO:0005575//cellular_component;GO:0005622//intracellular anatomical structure;GO:0005737//cytoplasm;GO:0005886//plasma membrane;GO:0016020//membrane;GO:0071944//cell periphery	GO:0003674//molecular_function;GO:0003824//catalytic activity;GO:0005488//binding;GO:0008168//methyltransferase activity;GO:0008172//S-methyltransferase activity;GO:0008270//zinc ion binding;GO:0008705//methionine synthase activity;GO:0016740//transferase activity;GO:0016741//transferase activity, transferring one-carbon groups;GO:0043167//ion binding;GO:0043169//cation binding;GO:0046872//metal …	GO:0000096//sulfur amino acid metabolic process;GO:0000097//sulfur amino acid biosynthetic process;GO:0006082//organic acid metabolic process;GO:0006520//cellular amino acid metabolic process;GO:0006555//methionine metabolic process;GO:0006790//sulfur compound metabolic process;GO:0006807//nitrogen compound metabolic process;GO:0008150//biological_process;GO:0008152//metabolic process;GO:0008652/…	--
Unigene0000544	0.65	0.536	0.41	0.174	1.815	0.465	--	KAH0687924.1 hypothetical protein KY284_018477 [Solanum tuberosum]	-	-	-	-	-	-	-	--
Unigene0000545	0	0	0	0	0.236	0.659	--	-	-	-	-	-	-	-	-	--
Unigene0000546	5.179	4.487	2.361	0.461	0.873	0.232	--	XP_016578475.1 PREDICTED: phosphopantothenoylcysteine decarboxylase subunit VHS3-like [Capsicum annuum]	-	-	-	-	-	-	-	--
Unigene0000547	0.693	0.772	0.438	0.37	0.451	0.744	--	-	-	-	-	-	-	-	-	--
Unigene0000548	2.877	4.144	3.817	0	0.907	0.187	BHLH147	PHT48678.1 Transcription factor [Capsicum baccatum]	-	-	-	-	-	-	-	--
Unigene0000549	0.522	0.646	0.329	0.558	0.301	0.14	--	-	-	-	-	-	-	-	-	--
Unigene0000550	7.016	6.42	5.458	3.607	2.207	3.337	At3g08570	XP_033512954.1 BTB/POZ domain-containing protein At3g08570-like isoform X1 [Nicotiana tomentosiformis]	-	-	-	-	-	GO:0005515//protein binding	GO:0006464//cellular protein modification process;GO:0006807//nitrogen compound metabolic process;GO:0008150//biological_process;GO:0008152//metabolic process;GO:0009987//cellular process;GO:0016567//protein ubiquitination;GO:0019538//protein metabolic process;GO:0032446//protein modification by small protein conjugation;GO:0036211//protein modification process;GO:0043170//macromolecule metabolic…	--
Unigene0000551	33.139	31.308	36.314	48.003	54.525	54.74	Os01g0367900	TMW94527.1 hypothetical protein EJD97_010133 [Solanum chilense]	-	-	-	-	GO:0005634//nucleus;GO:0070823//HDA1 complex	GO:0003676//nucleic acid binding;GO:0003677//DNA binding;GO:0005524//ATP binding;GO:0016787//hydrolase activity;GO:0016818//hydrolase activity, acting on acid anhydrides, in phosphorus-containing anhydrides;GO:0031491//nucleosome binding	GO:0006338//chromatin remodeling;GO:0016575//histone deacetylation	--
Unigene0000552	34.136	36.696	41.525	66.203	72.071	71.65	Os01g0367900	XP_015079346.1 ISWI chromatin-remodeling complex ATPase CHR11-like [Solanum pennellii]	-	-	-	-	GO:0005634//nucleus;GO:0070823//HDA1 complex	GO:0003676//nucleic acid binding;GO:0003677//DNA binding;GO:0005524//ATP binding;GO:0016787//hydrolase activity;GO:0016818//hydrolase activity, acting on acid anhydrides, in phosphorus-containing anhydrides;GO:0031491//nucleosome binding	GO:0006338//chromatin remodeling;GO:0016575//histone deacetylation;GO:0019285//glycine betaine biosynthetic process from choline;GO:0045892//negative regulation of transcription, DNA-templated	--
Unigene0000553	0	0.506	0	0	0	0.549	--	-	-	-	-	-	-	-	-	--
Unigene0000555	0.976	1.45	0.719	0.326	0.423	0.72	--	-	-	-	-	-	-	-	-	--
Unigene0000556	0	0.342	0.291	0	0	0	--	-	-	-	-	-	-	-	-	--
Unigene0000557	0.167	0.083	0.07	0.714	0.868	1.523	--	-	-	-	-	-	-	-	-	--
Unigene0000558	0	0.121	0	0	0.283	0.658	MBP	-	-	-	-	-	-	GO:0019911//structural constituent of myelin sheath	-	--
Unigene0000559	0.383	0	0	0.205	0	0.206	--	-	-	-	-	-	-	-	-	--
Unigene0000560	0	0	0.242	0.769	0.166	0.463	--	-	-	-	-	-	-	-	-	--
Unigene0000561	0.769	0.109	1.388	0.822	0.381	0	--	-	-	-	-	-	GO:0009368//endopeptidase Clp complex;GO:0033104//type VI protein secretion system complex	GO:0004176//ATP-dependent peptidase activity	GO:0006457//protein folding;GO:0006508//proteolysis;GO:0033103//protein secretion by the type VI secretion system;GO:0043335//protein unfolding	--
Unigene0000562	1.518	0.188	1.118	0.304	0.219	0	--	-	-	-	-	-	-	-	-	--
Unigene0000564	2.987	2.787	2.684	1.689	1.062	1.017	MET2A	KAH0724254.1 hypothetical protein KY284_000119 [Solanum tuberosum]	Metabolism;Metabolism	Global and overview maps;Amino acid metabolism	ko01100//Metabolic pathways;ko00270//Cysteine and methionine metabolism	K00558;K00558	-	GO:0003682//chromatin binding;GO:0003886//DNA (cytosine-5-)-methyltransferase activity;GO:0008168//methyltransferase activity	GO:0006304//DNA modification	--
Unigene0000566	0	0.14	0	0.756	0.491	0	--	-	-	-	-	-	-	-	-	--
Unigene0000567	0	0	0	2.187	0.197	0.183	--	-	-	-	-	-	-	-	-	--
Unigene0000568	0.536	0.498	0.874	0.394	0.581	0.647	--	-	-	-	-	-	-	-	-	--
Unigene0000569	0.374	0	0	0.2	0.432	0	--	KAG5611680.1 hypothetical protein H5410_022961 [Solanum commersonii]	-	-	-	-	-	GO:0003674//molecular_function;GO:0005488//binding;GO:0005515//protein binding;GO:0008022//protein C-terminus binding;GO:0030544//Hsp70 protein binding;GO:0031072//heat shock protein binding;GO:0051087//chaperone binding	GO:0006457//protein folding;GO:0008150//biological_process;GO:0009987//cellular process	--
Unigene0000571	3.215	2.749	2.83	2.031	2.702	2.405	--	XP_006350914.1 PREDICTED: uncharacterized protein LOC102586392 [Solanum tuberosum]	-	-	-	-	-	GO:0008270//zinc ion binding	-	--
Unigene0000574	0	0	0.29	0	0	0	PABPC1	-	-	-	-	-	-	-	-	--
Unigene0000576	0	0.168	0.715	0	0	0.365	Pabpc1	VEU42115.1 unnamed protein product [Pseudo-nitzschia multistriata]	Genetic Information Processing;Genetic Information Processing	Translation;Folding, sorting and degradation	ko03015//mRNA surveillance pathway;ko03018//RNA degradation	K13126;K13126	-	GO:0003723//RNA binding	-	--
Unigene0000577	43.36	35.779	39.783	192.1	195.725	184.552	--	XP_019265798.1 PREDICTED: protein SRC2 homolog [Nicotiana attenuata]	-	-	-	-	-	-	-	--
Unigene0000578	3.673	4.607	3.813	28.397	23.912	22.342	--	-	-	-	-	-	-	-	-	--
Unigene0000579	6.36	4.963	5.53	2.05	1.448	1.59	--	XP_019255136.1 PREDICTED: uncharacterized protein LOC109233725 [Nicotiana attenuata]	-	-	-	-	-	-	-	--
Unigene0000580	101.417	115.001	110.49	121.244	107.359	110.221	At3g12260	XP_015066318.1 NADH dehydrogenase [ubiquinone] 1 alpha subcomplex subunit 6 [Solanum pennellii]	Metabolism;Metabolism	Global and overview maps;Energy metabolism	ko01100//Metabolic pathways;ko00190//Oxidative phosphorylation	K03950;K03950	GO:0005575//cellular_component;GO:0005622//intracellular anatomical structure;GO:0005737//cytoplasm;GO:0005739//mitochondrion;GO:0005740//mitochondrial envelope;GO:0005743//mitochondrial inner membrane;GO:0005746//mitochondrial respirasome;GO:0005747//mitochondrial respiratory chain complex I;GO:0016020//membrane;GO:0019866//organelle inner membrane;GO:0030964//NADH dehydrogenase complex;GO:00310…	-	GO:0008150//biological_process;GO:0008152//metabolic process	--
Unigene0000581	1.517	1.414	1.277	2.051	1.599	1.629	PCMP-E28	OIT01373.1 pentatricopeptide repeat-containing protein, chloroplastic [Nicotiana attenuata]	-	-	-	-	-	-	GO:0033566//gamma-tubulin complex localization	--
Unigene0000582	2.264	2.478	2.541	0.977	0.413	0.469	--	XP_015164907.1 PREDICTED: uncharacterized protein LOC107060889 [Solanum tuberosum]	-	-	-	-	-	-	-	--
Unigene0000583	0	0.181	0.308	0	1.057	0	--	-	-	-	-	-	-	-	-	--
Unigene0000584	0	0	0.379	0.24	0.52	0	--	-	-	-	-	-	-	-	-	--
Unigene0000585	0	0	0.357	0	0	0	--	-	-	-	-	-	-	-	-	--
Unigene0000586	7.02	7.395	6.976	36.108	46.118	33.317	Nop14	XP_006348659.1 PREDICTED: nucleolar protein 14 [Solanum tuberosum]	-	-	-	-	GO:0032040//small-subunit processome	-	GO:0030705//cytoskeleton-dependent intracellular transport	--
Unigene0000587	9.641	15.266	11.183	17.476	11.964	9.777	CYCD1-1	KAH0675279.1 hypothetical protein KY285_023080 [Solanum tuberosum]	-	-	-	-	GO:0005575//cellular_component;GO:0005622//intracellular anatomical structure;GO:0005634//nucleus;GO:0043226//organelle;GO:0043227//membrane-bounded organelle;GO:0043229//intracellular organelle;GO:0043231//intracellular membrane-bounded organelle	-	GO:0007049//cell cycle;GO:0008150//biological_process;GO:0009987//cellular process;GO:0051301//cell division	--
Unigene0000588	0	1.126	0.718	0	0	0	--	-	-	-	-	-	-	-	-	--
Unigene0000589	0.352	0.785	0.148	0.471	0.204	0.378	--	KAG5599065.1 hypothetical protein H5410_030435 [Solanum commersonii]	-	-	-	-	-	-	-	--
Unigene0000590	1.648	1.632	2.841	0.252	0.363	0.59	--	KAG5599065.1 hypothetical protein H5410_030435 [Solanum commersonii]	-	-	-	-	-	-	-	--
Unigene0000591	0.553	0.456	1.861	0.689	0	0.198	--	-	-	-	-	-	-	-	-	--
Unigene0000592	0.052	0.145	0.492	76.357	0.181	0.493	ORF	PWA60009.1 reverse transcriptase [Artemisia annua]	-	-	-	-	-	GO:0003676//nucleic acid binding;GO:0004190//aspartic-type endopeptidase activity;GO:0008270//zinc ion binding	GO:0006508//proteolysis	--
Unigene0000596	1.266	0	0.266	0.507	0.183	0	--	-	-	-	-	-	-	-	-	--
Unigene0000597	5.827	5.961	7.914	8.224	9.525	8.64	SHA	KAH0654601.1 hypothetical protein KY289_032279 [Solanum tuberosum]	-	-	-	-	-	-	-	STAT
Unigene0000598	4.84	3.83	4.974	1.42	2.029	1.808	--	KAG5587698.1 hypothetical protein H5410_048132 [Solanum commersonii]	-	-	-	-	-	GO:0004553//hydrolase activity, hydrolyzing O-glycosyl compounds	GO:0005975//carbohydrate metabolic process	--
Unigene0000599	87.436	71.58	69.37	14.846	15.546	11.681	--	XP_009785171.1 PREDICTED: uncharacterized protein LOC104233475 [Nicotiana sylvestris]	-	-	-	-	-	-	-	--
Unigene0000601	0.93	0	0	0	0.806	0	--	-	-	-	-	-	-	-	-	--
Unigene0000602	15.225	14.494	13.357	15.361	17.658	17.491	DOF5.1	KAF3658442.1 Dof zinc finger protein DOF5.1 [Capsicum annuum]	-	-	-	-	-	GO:0003677//DNA binding	GO:0006355//regulation of transcription, DNA-templated	--
Unigene0000603	0.473	0.468	0	0	0	0	--	-	-	-	-	-	-	GO:0008270//zinc ion binding	-	--
Unigene0000604	0.966	1.247	1.237	3.995	1.31	3.787	CSLG1	XP_016465828.1 PREDICTED: cellulose synthase-like protein G2 [Nicotiana tabacum]	-	-	-	-	GO:0016020//membrane	GO:0016760//cellulose synthase (UDP-forming) activity;GO:0016846//carbon-sulfur lyase activity	GO:0030244//cellulose biosynthetic process	--
Unigene0000605	0	0	1.258	0	0	0	--	OIT39985.1 cellulose synthase-like protein g2 [Nicotiana attenuata]	-	-	-	-	GO:0016020//membrane	GO:0016760//cellulose synthase (UDP-forming) activity	GO:0030244//cellulose biosynthetic process	--
Unigene0000606	5.421	4.689	5.554	2.793	5.171	4.172	MTS1	XP_010323022.1 uncharacterized protein LOC101246066 isoform X3 [Solanum lycopersicum]	-	-	-	-	-	GO:0008168//methyltransferase activity	GO:0032259//methylation	--
Unigene0000607	7.034	7.779	7.133	1.627	1.379	1.59	CAT8	XP_009604320.1 cationic amino acid transporter 8, vacuolar [Nicotiana tomentosiformis]	-	-	-	-	GO:0005575//cellular_component;GO:0005622//intracellular anatomical structure;GO:0005737//cytoplasm;GO:0005773//vacuole;GO:0005774//vacuolar membrane;GO:0005886//plasma membrane;GO:0016020//membrane;GO:0016021//integral component of membrane;GO:0031090//organelle membrane;GO:0031224//intrinsic component of membrane;GO:0043226//organelle;GO:0043227//membrane-bounded organelle;GO:0043229//intracell…	GO:0003674//molecular_function;GO:0005215//transporter activity;GO:0015171//amino acid transmembrane transporter activity;GO:0022857//transmembrane transporter activity	GO:0006810//transport;GO:0006811//ion transport;GO:0006820//anion transport;GO:0006865//amino acid transport;GO:0008150//biological_process;GO:0015711//organic anion transport;GO:0015849//organic acid transport;GO:0046942//carboxylic acid transport;GO:0051179//localization;GO:0051234//establishment of localization;GO:0055085//transmembrane transport;GO:0071702//organic substance transport;GO:0071…	--
Unigene0000608	54.908	65.254	52.583	9.338	6.519	8.674	SIGB	XP_016465884.1 PREDICTED: RNA polymerase sigma factor sigB-like [Nicotiana tabacum]	-	-	-	-	-	GO:0003700//DNA-binding transcription factor activity;GO:0016987//sigma factor activity	GO:0006352//DNA-templated transcription, initiation;GO:0006355//regulation of transcription, DNA-templated;GO:0006950//response to stress;GO:0030436//asexual sporulation;GO:0042173//regulation of sporulation resulting in formation of a cellular spore	--
Unigene0000609	44.552	46.888	43.182	15.874	11.371	13.489	SIGB	XP_004229543.1 RNA polymerase sigma factor sigB [Solanum lycopersicum]	-	-	-	-	-	GO:0003677//DNA binding;GO:0003700//DNA-binding transcription factor activity;GO:0016987//sigma factor activity	GO:0006352//DNA-templated transcription, initiation;GO:0006355//regulation of transcription, DNA-templated;GO:0006950//response to stress;GO:0030436//asexual sporulation;GO:0042173//regulation of sporulation resulting in formation of a cellular spore	--
Unigene0000610	18.663	17.904	26.061	36.971	40.567	33.232	--	PHT33356.1 hypothetical protein CQW23_25156 [Capsicum baccatum]	-	-	-	-	-	GO:0005515//protein binding	-	--
Unigene0000611	0.302	1.046	0.762	1.452	1.744	0.486	--	-	-	-	-	-	-	-	-	--
Unigene0000613	0.717	0.437	0.371	2.182	1.275	0.888	--	-	-	-	-	-	-	-	-	--
Unigene0000614	11.03	10.404	9.208	1.018	0.959	0.726	--	XP_006342048.1 PREDICTED: uncharacterized protein LOC102595950 isoform X2 [Solanum tuberosum]	-	-	-	-	-	-	-	--
Unigene0000615	0.346	0.628	0.776	1.663	1.665	0.742	CYB561B	KAH0771919.1 hypothetical protein KY290_015900 [Solanum tuberosum]	-	-	-	-	-	-	-	--
Unigene0000616	7.594	7.683	9.138	9.279	8.3	8.271	YAK1	KAF3624105.1 RNA polymerase sigma factor sigA [Capsicum annuum]	-	-	-	-	GO:0005575//cellular_component;GO:0005622//intracellular anatomical structure;GO:0005634//nucleus;GO:0005737//cytoplasm;GO:0005829//cytosol;GO:0005911//cell-cell junction;GO:0009506//plasmodesma;GO:0030054//cell junction;GO:0043226//organelle;GO:0043227//membrane-bounded organelle;GO:0043229//intracellular organelle;GO:0043231//intracellular membrane-bounded organelle;GO:0055044//symplast	GO:0000166//nucleotide binding;GO:0003674//molecular_function;GO:0003677//DNA binding;GO:0003824//catalytic activity;GO:0004672//protein kinase activity;GO:0004674//protein serine/threonine kinase activity;GO:0004712//protein serine/threonine/tyrosine kinase activity;GO:0004713//protein tyrosine kinase activity;GO:0005488//binding;GO:0005524//ATP binding;GO:0016301//kinase activity;GO:0016740//tr…	GO:0001101//response to acid chemical;GO:0006355//regulation of transcription, DNA-templated;GO:0006464//cellular protein modification process;GO:0006468//protein phosphorylation;GO:0006793//phosphorus metabolic process;GO:0006796//phosphate-containing compound metabolic process;GO:0006807//nitrogen compound metabolic process;GO:0006935//chemotaxis;GO:0006950//response to stress;GO:0006970//respo…	--
Unigene0000617	15.905	15.842	17.335	19.939	20.188	19.256	NAP1	XP_009764465.1 PREDICTED: protein NAP1 [Nicotiana sylvestris]	-	-	-	-	GO:0005575//cellular_component;GO:0005622//intracellular anatomical structure;GO:0005634//nucleus;GO:0005737//cytoplasm;GO:0005783//endoplasmic reticulum;GO:0005789//endoplasmic reticulum membrane;GO:0005911//cell-cell junction;GO:0012505//endomembrane system;GO:0016020//membrane;GO:0030054//cell junction;GO:0030175//filopodium;GO:0031143//pseudopodium;GO:0031209//SCAR complex;GO:0031252//cell le…	GO:0003674//molecular_function;GO:0005488//binding;GO:0005515//protein binding	GO:0000003//reproduction;GO:0000768//syncytium formation by plasma membrane fusion;GO:0000902//cell morphogenesis;GO:0000904//cell morphogenesis involved in differentiation;GO:0001764//neuron migration;GO:0006355//regulation of transcription, DNA-templated;GO:0006928//movement of cell or subcellular component;GO:0006949//syncytium formation;GO:0006950//response to stress;GO:0006970//response to o…	--
Unigene0000618	0.354	0	0	0.378	0	0	--	XP_016498719.1 PREDICTED: uncharacterized protein LOC107817408 [Nicotiana tabacum]	-	-	-	-	-	-	-	--
Unigene0000620	3.128	1.696	3.198	2.428	2.711	3.678	--	-	-	-	-	-	-	-	-	--
Unigene0000621	0	0	0	24.506	18.273	4.668	TPS31	KAF3619924.1 5-epiaristolochene synthase [Capsicum annuum]	Metabolism	Metabolism of terpenoids and polyketides	ko00909//Sesquiterpenoid and triterpenoid biosynthesis	K15803	-	GO:0005515//protein binding;GO:0010333//terpene synthase activity;GO:0016829//lyase activity	-	--
Unigene0000622	3.726	3.823	3.439	1.2	1.09	1.036	--	XP_016500178.1 PREDICTED: chaperone protein DnaJ-like isoform X1 [Nicotiana tabacum]	-	-	-	-	-	GO:0005515//protein binding	GO:0006457//protein folding;GO:0009408//response to heat	--
Unigene0000623	0	0.302	0.514	0	0	0	--	-	-	-	-	-	-	-	-	--
Unigene0000625	0	0	0	0.622	0	0	--	-	-	-	-	-	GO:0005730//nucleolus	-	GO:0042254//ribosome biogenesis	--
Unigene0000626	2.106	0.834	1.064	0.563	0.365	1.357	--	-	-	-	-	-	-	-	-	--
Unigene0000627	24.398	23.821	28.864	151.061	203.778	195.217	GSH1	XP_016566920.1 PREDICTED: glutamate--cysteine ligase, chloroplastic isoform X1 [Capsicum annuum]	Metabolism;Metabolism;Metabolism	Global and overview maps;Amino acid metabolism;Metabolism of other amino acids	ko01100//Metabolic pathways;ko00270//Cysteine and methionine metabolism;ko00480//Glutathione metabolism	K01919;K01919;K01919	GO:0005575//cellular_component;GO:0005622//intracellular anatomical structure;GO:0005737//cytoplasm;GO:0009507//chloroplast;GO:0009532//plastid stroma;GO:0009536//plastid;GO:0009570//chloroplast stroma;GO:0043226//organelle;GO:0043227//membrane-bounded organelle;GO:0043229//intracellular organelle;GO:0043231//intracellular membrane-bounded organelle	GO:0000166//nucleotide binding;GO:0003674//molecular_function;GO:0003824//catalytic activity;GO:0004357//glutamate-cysteine ligase activity;GO:0005488//binding;GO:0005524//ATP binding;GO:0016874//ligase activity;GO:0016879//ligase activity, forming carbon-nitrogen bonds;GO:0016881//acid-amino acid ligase activity;GO:0017076//purine nucleotide binding;GO:0030554//adenyl nucleotide binding;GO:00325…	GO:0000003//reproduction;GO:0000302//response to reactive oxygen species;GO:0001101//response to acid chemical;GO:0002213//defense response to insect;GO:0002376//immune system process;GO:0003006//developmental process involved in reproduction;GO:0006082//organic acid metabolic process;GO:0006518//peptide metabolic process;GO:0006575//cellular modified amino acid metabolic process;GO:0006725//cell…	--
Unigene0000629	3.421	3.274	3.703	5.47	5.084	6.265	At4g14310	KAH0640449.1 hypothetical protein KY285_037035 [Solanum tuberosum]	-	-	-	-	-	-	-	--
Unigene0000630	5.67	4.826	5.72	3.156	3.304	3.169	DPB	KAH0634684.1 hypothetical protein KY284_037470 [Solanum tuberosum]	-	-	-	-	GO:0005575//cellular_component;GO:0005622//intracellular anatomical structure;GO:0005634//nucleus;GO:0005667//transcription regulator complex;GO:0005737//cytoplasm;GO:0032991//protein-containing complex;GO:0043226//organelle;GO:0043227//membrane-bounded organelle;GO:0043229//intracellular organelle;GO:0043231//intracellular membrane-bounded organelle	GO:0000981//DNA-binding transcription factor activity, RNA polymerase II-specific;GO:0003674//molecular_function;GO:0003676//nucleic acid binding;GO:0003677//DNA binding;GO:0003700//DNA-binding transcription factor activity;GO:0005488//binding;GO:0005515//protein binding;GO:0046982//protein heterodimerization activity;GO:0046983//protein dimerization activity;GO:0097159//organic cyclic compound b…	GO:0000082//G1/S transition of mitotic cell cycle;GO:0000278//mitotic cell cycle;GO:0006139//nucleobase-containing compound metabolic process;GO:0006259//DNA metabolic process;GO:0006260//DNA replication;GO:0006261//DNA-dependent DNA replication;GO:0006351//transcription, DNA-templated;GO:0006355//regulation of transcription, DNA-templated;GO:0006357//regulation of transcription by RNA polymerase…	E2F/DP
Unigene0000631	0.106	0	0.622	75.489	17.203	38.756	--	XP_009624033.1 cucumber peeling cupredoxin-like [Nicotiana tomentosiformis]	-	-	-	-	-	GO:0009055//electron transfer activity	-	--
Unigene0000632	0.22	0.218	1.299	0	0.255	0	--	-	-	-	-	-	-	-	-	--
Unigene0000635	1.875	0	0	0	0	0	RD21B	XP_019265936.1 PREDICTED: LOW QUALITY PROTEIN: low-temperature-induced cysteine proteinase-like [Nicotiana attenuata]	-	-	-	-	GO:0015630//microtubule cytoskeleton	GO:0003674//molecular_function;GO:0003824//catalytic activity;GO:0008017//microtubule binding;GO:0008233//peptidase activity;GO:0008234//cysteine-type peptidase activity;GO:0016787//hydrolase activity;GO:0140096//catalytic activity, acting on a protein	GO:0006508//proteolysis;GO:0006807//nitrogen compound metabolic process;GO:0008150//biological_process;GO:0008152//metabolic process;GO:0019538//protein metabolic process;GO:0043170//macromolecule metabolic process;GO:0044238//primary metabolic process;GO:0071704//organic substance metabolic process;GO:1901564//organonitrogen compound metabolic process	--
Unigene0000636	0.881	1.428	1.012	1.285	0.648	1.032	--	-	-	-	-	-	-	-	-	--
Unigene0000639	0.263	0	0	0	0	0	--	-	-	-	-	-	-	-	-	--
Unigene0000640	8.47	4.424	8.071	12.238	15.814	17.236	SOK5	KAG5578634.1 hypothetical protein H5410_058768 [Solanum commersonii]	-	-	-	-	-	-	-	--
Unigene0000641	0	0	0	0	0.413	0.384	--	-	-	-	-	-	-	-	-	--
Unigene0000642	0	0.737	0	0	0	0	--	-	-	-	-	-	-	-	-	--
Unigene0000643	0	0.15	0	0.162	1.403	0.326	--	-	-	-	-	-	-	-	-	--
Unigene0000644	0.314	0	0	0	0	0	--	-	-	-	-	-	-	-	-	--
Unigene0000645	0	0	0.241	0	0.66	0.613	--	-	-	-	-	-	-	-	-	--
Unigene0000646	1.459	2.807	2.294	5.266	4.071	4.904	P4H7	XP_009766050.1 PREDICTED: probable prolyl 4-hydroxylase 6 [Nicotiana sylvestris]	Metabolism;Metabolism	Global and overview maps;Amino acid metabolism	ko01100//Metabolic pathways;ko00330//Arginine and proline metabolism	K00472;K00472	-	GO:0016491//oxidoreductase activity	-	--
Unigene0000647	0.412	1.225	1.388	0	0.476	0.443	GA2OX8	XP_006350843.1 PREDICTED: gibberellin 2-beta-dioxygenase 8 [Solanum tuberosum]	-	-	-	-	-	GO:0003674//molecular_function;GO:0003824//catalytic activity;GO:0005488//binding;GO:0016491//oxidoreductase activity;GO:0016705//oxidoreductase activity, acting on paired donors, with incorporation or reduction of molecular oxygen;GO:0016706//2-oxoglutarate-dependent dioxygenase activity;GO:0043167//ion binding;GO:0043169//cation binding;GO:0045543//gibberellin 2-beta-dioxygenase activity;GO:004…	GO:0006082//organic acid metabolic process;GO:0006629//lipid metabolic process;GO:0006720//isoprenoid metabolic process;GO:0006721//terpenoid metabolic process;GO:0008150//biological_process;GO:0008152//metabolic process;GO:0008299//isoprenoid biosynthetic process;GO:0008610//lipid biosynthetic process;GO:0009058//biosynthetic process;GO:0009685//gibberellin metabolic process;GO:0009686//gibberel…	--
Unigene0000648	0.22	1.309	0	0.471	0	0	--	-	-	-	-	-	-	-	-	--
Unigene0000649	0.517	0.683	0.436	0	1.196	0.37	--	XP_006357128.1 PREDICTED: probable prolyl 4-hydroxylase 6 [Solanum tuberosum]	Metabolism;Metabolism	Global and overview maps;Amino acid metabolism	ko01100//Metabolic pathways;ko00330//Arginine and proline metabolism	K00472;K00472	-	GO:0016491//oxidoreductase activity	-	--
Unigene0000650	1.597	0.654	1.298	9.534	10.372	5.792	--	-	-	-	-	-	-	-	-	--
Unigene0000651	1.991	1.541	2.164	2.36	1.757	1.671	--	KAG5597508.1 hypothetical protein H5410_038740 [Solanum commersonii]	-	-	-	-	-	-	-	--
Unigene0000652	1.366	1.522	2.961	1.387	3.316	1.723	--	-	-	-	-	-	-	-	-	--
Unigene0000653	1.95	0.834	0.933	50.118	34.829	42.483	STP14	TMX01376.1 hypothetical protein EJD97_024628 [Solanum chilense]	-	-	-	-	GO:0005887//integral component of plasma membrane;GO:0016021//integral component of membrane	GO:0008028//monocarboxylic acid transmembrane transporter activity;GO:0015114//phosphate ion transmembrane transporter activity;GO:0015295//solute:proton symporter activity;GO:0022857//transmembrane transporter activity;GO:0042910//xenobiotic transmembrane transporter activity;GO:0051119//sugar transmembrane transporter activity	GO:0006810//transport;GO:0006817//phosphate ion transport;GO:0006855//xenobiotic transmembrane transport;GO:0008643//carbohydrate transport;GO:0015718//monocarboxylic acid transport;GO:0042908//xenobiotic transport;GO:0055085//transmembrane transport	--
Unigene0000654	28.736	28.295	29.514	26.115	23.572	24.725	At2g20020	PHT30453.1 CRS2-associated factor 1, chloroplastic [Capsicum baccatum]	-	-	-	-	GO:0005575//cellular_component;GO:0005622//intracellular anatomical structure;GO:0005737//cytoplasm;GO:0009507//chloroplast;GO:0009532//plastid stroma;GO:0009536//plastid;GO:0009570//chloroplast stroma;GO:0043226//organelle;GO:0043227//membrane-bounded organelle;GO:0043229//intracellular organelle;GO:0043231//intracellular membrane-bounded organelle	GO:0003674//molecular_function;GO:0003676//nucleic acid binding;GO:0003723//RNA binding;GO:0005488//binding;GO:0097159//organic cyclic compound binding;GO:1901363//heterocyclic compound binding	GO:0000373//Group II intron splicing;GO:0000375//RNA splicing, via transesterification reactions;GO:0000377//RNA splicing, via transesterification reactions with bulged adenosine as nucleophile;GO:0006139//nucleobase-containing compound metabolic process;GO:0006396//RNA processing;GO:0006397//mRNA processing;GO:0006725//cellular aromatic compound metabolic process;GO:0006807//nitrogen compound me…	--
Unigene0000655	29.205	26.582	36.804	43.705	49.369	53.265	ACBP1	XP_009773322.1 PREDICTED: acyl-CoA-binding domain-containing protein 1-like [Nicotiana sylvestris]	-	-	-	-	GO:0005575//cellular_component;GO:0005622//intracellular anatomical structure;GO:0005737//cytoplasm;GO:0005777//peroxisome;GO:0005778//peroxisomal membrane;GO:0005783//endoplasmic reticulum;GO:0005789//endoplasmic reticulum membrane;GO:0005886//plasma membrane;GO:0009514//glyoxysome;GO:0012505//endomembrane system;GO:0016020//membrane;GO:0016021//integral component of membrane;GO:0031090//organel…	GO:0000062//fatty-acyl-CoA binding;GO:0000166//nucleotide binding;GO:0003674//molecular_function;GO:0005488//binding;GO:0005515//protein binding;GO:0008289//lipid binding;GO:0017076//purine nucleotide binding;GO:0030554//adenyl nucleotide binding;GO:0032553//ribonucleotide binding;GO:0032555//purine ribonucleotide binding;GO:0032559//adenyl ribonucleotide binding;GO:0032791//lead ion binding;GO:0…	GO:0001666//response to hypoxia;GO:0006810//transport;GO:0006869//lipid transport;GO:0006950//response to stress;GO:0008150//biological_process;GO:0009628//response to abiotic stimulus;GO:0010035//response to inorganic substance;GO:0010038//response to metal ion;GO:0010288//response to lead ion;GO:0010876//lipid localization;GO:0033036//macromolecule localization;GO:0036293//response to decreased…	--
Unigene0000656	5.401	5.901	3.971	5.308	8.322	7.73	--	XP_016504743.1 PREDICTED: uncharacterized protein LOC107822695 [Nicotiana tabacum]	-	-	-	-	-	-	-	--
Unigene0000657	0	0	0	0.739	0	0	--	-	-	-	-	-	-	-	-	--
Unigene0000658	30.781	27.227	21.611	9.981	9.737	8.587	KAS2	XP_016554212.1 PREDICTED: 3-oxoacyl-[acyl-carrier-protein] synthase II, chloroplastic-like isoform X2 [Capsicum annuum]	Metabolism;Metabolism;Metabolism;Metabolism	Global and overview maps;Global and overview maps;Lipid metabolism;Metabolism of cofactors and vitamins	ko01100//Metabolic pathways;ko01212//Fatty acid metabolism;ko00061//Fatty acid biosynthesis;ko00780//Biotin metabolism	K09458;K09458;K09458;K09458	-	GO:0003985//acetyl-CoA C-acetyltransferase activity;GO:0003988//acetyl-CoA C-acyltransferase activity;GO:0016747//acyltransferase activity, transferring groups other than amino-acyl groups	GO:0006631//fatty acid metabolic process;GO:0006633//fatty acid biosynthetic process;GO:0009062//fatty acid catabolic process	--
Unigene0000659	1.466	0.544	0	0	1.059	1.18	--	-	-	-	-	-	-	-	-	--
Unigene0000660	0.977	1.37	1.165	1.653	1.881	1.398	--	-	-	-	-	-	-	-	-	--
Unigene0000661	22.529	28.701	27.523	63.727	62.077	59.969	SPBC16G5.07c	XP_009629937.1 stomatin-like protein 2, mitochondrial [Nicotiana tomentosiformis]	-	-	-	-	GO:0030288//outer membrane-bounded periplasmic space	GO:0003674//molecular_function	GO:0045861//negative regulation of proteolysis	--
Unigene0000662	0.923	0	0.388	0.247	0	0.248	--	-	-	-	-	-	-	-	-	--
Unigene0000663	0.378	0	0	0.404	0.437	1.218	--	-	-	-	-	-	-	-	-	--
Unigene0000664	0.208	0.206	0	0	0	0	--	XP_009803597.1 PREDICTED: uncharacterized protein LOC104248941 [Nicotiana sylvestris]	-	-	-	-	GO:0016021//integral component of membrane	GO:0008375//acetylglucosaminyltransferase activity	GO:0000271//polysaccharide biosynthetic process;GO:0042710//biofilm formation;GO:0043709//cell adhesion involved in single-species biofilm formation	--
Unigene0000665	0.539	0.356	0.302	0.192	0	0.385	--	XP_016511541.1 PREDICTED: kinesin-13A-like [Nicotiana tabacum]	-	-	-	-	-	-	-	--
Unigene0000666	0	0.197	0.501	0.637	1.147	0.852	--	XP_016440329.1 PREDICTED: uncharacterized protein LOC107766112 [Nicotiana tabacum]	-	-	-	-	GO:0009898//cytoplasmic side of plasma membrane;GO:0055052//ATP-binding cassette (ABC) transporter complex, substrate-binding subunit-containing	GO:0005524//ATP binding;GO:0033221//ATPase-coupled urea transmembrane transporter activity	GO:0015840//urea transport	--
Unigene0000667	0	0	0	0.24	0.78	0	--	-	-	-	-	-	-	-	-	--
Unigene0000669	0.226	0.224	0	0.242	0.261	0	--	-	-	-	-	-	-	-	-	--
Unigene0000670	0.109	1.833	0.733	1.339	2.832	10.403	DNAJB13	XP_009613462.1 dnaJ homolog subfamily B member 1-like [Nicotiana tomentosiformis]	-	-	-	-	GO:0005575//cellular_component;GO:0005622//intracellular anatomical structure;GO:0005737//cytoplasm;GO:0005856//cytoskeleton;GO:0005929//cilium;GO:0005930//axoneme;GO:0031514//motile cilium;GO:0032838//plasma membrane bounded cell projection cytoplasm;GO:0036126//sperm flagellum;GO:0042995//cell projection;GO:0043226//organelle;GO:0043228//non-membrane-bounded organelle;GO:0043229//intracellular …	GO:0003674//molecular_function;GO:0005488//binding;GO:0005515//protein binding;GO:0051082//unfolded protein binding	GO:0000226//microtubule cytoskeleton organization;GO:0001578//microtubule bundle formation;GO:0006457//protein folding;GO:0006996//organelle organization;GO:0007010//cytoskeleton organization;GO:0007017//microtubule-based process;GO:0008150//biological_process;GO:0009408//response to heat;GO:0009987//cellular process;GO:0016043//cellular component organization;GO:0022607//cellular component assem…	--
Unigene0000671	5.936	6.769	4.493	2.372	1.802	0.837	CYCD3-3	KAH0705264.1 hypothetical protein KY289_010340 [Solanum tuberosum]	Environmental Information Processing	Signal transduction	ko04075//Plant hormone signal transduction	K14505	-	-	-	--
Unigene0000672	1.245	1.263	1.388	1.463	1.798	1.169	REN1	KAH0681402.1 hypothetical protein KY284_022487 [Solanum tuberosum]	-	-	-	-	-	-	GO:0007165//signal transduction	--
Unigene0000673	1.858	2.353	1.309	1.94	1.998	1.623	CYCA3-2	PHU04698.1 putative cyclin-A3-1 [Capsicum chinense]	-	-	-	-	-	-	-	--
Unigene0000674	0.698	0	0	0.497	0	0.749	--	-	-	-	-	-	-	-	-	--
Unigene0000675	0.786	0	0.588	0.28	0	0.563	--	KAH0722522.1 hypothetical protein KY289_005566 [Solanum tuberosum]	-	-	-	-	-	-	-	--
Unigene0000677	30.677	32.113	27.924	8.492	6.417	5.852	OsI_35105	XP_016482187.1 PREDICTED: pyruvate kinase 1, cytosolic-like [Nicotiana tabacum]	Metabolism;Metabolism;Metabolism;Metabolism;Metabolism;Metabolism	Global and overview maps;Global and overview maps;Global and overview maps;Global and overview maps;Carbohydrate metabolism;Carbohydrate metabolism	ko01100//Metabolic pathways;ko01110//Biosynthesis of secondary metabolites;ko01200//Carbon metabolism;ko01230//Biosynthesis of amino acids;ko00010//Glycolysis / Gluconeogenesis;ko00620//Pyruvate metabolism	K00873;K00873;K00873;K00873;K00873;K00873	GO:0005737//cytoplasm	GO:0000287//magnesium ion binding;GO:0004743//pyruvate kinase activity;GO:0030955//potassium ion binding	GO:0006096//glycolytic process	--
Unigene0000678	20.505	38.84	20.328	8.896	7.165	14.605	ABCG22	KAF3670670.1 ABC transporter G family member 27 [Capsicum annuum]	Environmental Information Processing	Membrane transport	ko02010//ABC transporters	K05681	GO:0005575//cellular_component;GO:0005886//plasma membrane;GO:0005887//integral component of plasma membrane;GO:0009380//excinuclease repair complex;GO:0009898//cytoplasmic side of plasma membrane;GO:0016020//membrane;GO:0016021//integral component of membrane;GO:0031224//intrinsic component of membrane;GO:0043190//ATP-binding cassette (ABC) transporter complex;GO:0055051//ATP-binding cassette (A…	GO:0000166//nucleotide binding;GO:0003674//molecular_function;GO:0003824//catalytic activity;GO:0003924//GTPase activity;GO:0004672//protein kinase activity;GO:0005215//transporter activity;GO:0005260//intracellularly ATP-gated chloride channel activity;GO:0005319//lipid transporter activity;GO:0005488//binding;GO:0005509//calcium ion binding;GO:0005515//protein binding;GO:0005524//ATP binding;GO…	GO:0000910//cytokinesis;GO:0001101//response to acid chemical;GO:0006289//nucleotide-excision repair;GO:0006468//protein phosphorylation;GO:0006810//transport;GO:0006817//phosphate ion transport;GO:0006824//cobalt ion transport;GO:0006833//water transport;GO:0006855//xenobiotic transmembrane transport;GO:0006869//lipid transport;GO:0006950//response to stress;GO:0007601//visual perception;GO:0008…	--
Unigene0000679	10.467	10.091	11.162	10.93	10.203	11.513	At5g16450	PHT81277.1 putative 4-hydroxy-4-methyl-2-oxoglutarate aldolase [Capsicum annuum]	-	-	-	-	-	GO:0008428//ribonuclease inhibitor activity	GO:0051252//regulation of RNA metabolic process	--
Unigene0000680	0.137	0.271	0	1.026	2.218	2.502	--	KAG5579150.1 hypothetical protein H5410_049777 [Solanum commersonii]	-	-	-	-	-	-	-	--
Unigene0000681	0.884	1.094	0.186	1.653	2.553	2.372	--	-	-	-	-	-	-	-	-	--
Unigene0000683	0	0	0	0.248	0.268	0	--	-	-	-	-	-	-	-	-	--
Unigene0000684	53.495	68.044	50.544	90.01	77.513	95.995	IMDH2	KAH0671864.1 hypothetical protein KY284_022951 [Solanum tuberosum]	Metabolism;Metabolism;Metabolism;Metabolism;Metabolism;Metabolism	Global and overview maps;Global and overview maps;Global and overview maps;Global and overview maps;Amino acid metabolism;Carbohydrate metabolism	ko01100//Metabolic pathways;ko01110//Biosynthesis of secondary metabolites;ko01230//Biosynthesis of amino acids;ko01210//2-Oxocarboxylic acid metabolism;ko00290//Valine, leucine and isoleucine biosynthesis;ko00660//C5-Branched dibasic acid metabolism	K00052;K00052;K00052;K00052;K00052;K00052	GO:0005962//mitochondrial isocitrate dehydrogenase complex (NAD+);GO:0045243//cytosolic isocitrate dehydrogenase complex (NAD+)	GO:0003862//3-isopropylmalate dehydrogenase activity;GO:0004449//isocitrate dehydrogenase (NAD+) activity;GO:0004450//isocitrate dehydrogenase (NADP+) activity;GO:0009027//tartrate dehydrogenase activity;GO:0016616//oxidoreductase activity, acting on the CH-OH group of donors, NAD or NADP as acceptor	GO:0006099//tricarboxylic acid cycle;GO:0006102//isocitrate metabolic process;GO:0009098//leucine biosynthetic process;GO:0046395//carboxylic acid catabolic process	--
Unigene0000685	5.85	4.364	5.22	0.875	0.541	0.921	--	XP_009759380.1 PREDICTED: mavicyanin-like isoform X1 [Nicotiana sylvestris]	-	-	-	-	-	GO:0009055//electron transfer activity	-	--
Unigene0000686	0.944	0.748	0.159	0	0	0	--	-	-	-	-	-	-	-	-	--
Unigene0000687	0.932	1.187	1.233	0	0.769	1.572	--	-	-	-	-	-	-	-	-	--
Unigene0000688	0	0	0.271	0	0	0	--	-	-	-	-	-	-	-	-	--
Unigene0000690	0.366	0.362	0.616	0.782	0	0	--	-	-	-	-	-	-	-	-	--
Unigene0000691	0	0	0	1.459	1.262	0	--	-	-	-	-	-	-	-	-	--
Unigene0000692	0	0	0.584	0	0	0	--	-	-	-	-	-	GO:0000813//ESCRT I complex	GO:0004345//glucose-6-phosphate dehydrogenase activity;GO:0050661//NADP binding	GO:0006006//glucose metabolic process	--
Unigene0000693	8.685	9.656	13.083	20.196	13.472	9.732	--	XP_019235602.1 PREDICTED: uncharacterized protein LOC109215934 isoform X1 [Nicotiana attenuata]	-	-	-	-	-	-	-	--
Unigene0000694	143.049	119.701	122.287	20.352	16.067	17.735	CPLS1	XP_009762360.1 PREDICTED: uncharacterized protein LOC104214399 [Nicotiana sylvestris]	-	-	-	-	-	-	GO:0006807//nitrogen compound metabolic process;GO:0008150//biological_process;GO:0008152//metabolic process;GO:0009056//catabolic process;GO:0009057//macromolecule catabolic process;GO:0019538//protein metabolic process;GO:0030163//protein catabolic process;GO:0043170//macromolecule metabolic process;GO:0044238//primary metabolic process;GO:0071704//organic substance metabolic process;GO:1901564…	--
Unigene0000695	0	0.237	0.201	0	0.276	0.256	--	-	-	-	-	-	-	-	-	--
Unigene0000696	15.958	17.257	14.424	8.753	12.328	6.537	--	PHT46622.1 hypothetical protein CQW23_15780 [Capsicum baccatum]	-	-	-	-	GO:0009898//cytoplasmic side of plasma membrane;GO:0055052//ATP-binding cassette (ABC) transporter complex, substrate-binding subunit-containing	GO:0003924//GTPase activity;GO:0005319//lipid transporter activity;GO:0005524//ATP binding;GO:0005525//GTP binding;GO:0015415//ATPase-coupled phosphate ion transmembrane transporter activity;GO:0016887//ATP hydrolysis activity;GO:0019001//guanyl nucleotide binding;GO:0031683//G-protein beta/gamma-subunit complex binding;GO:0042626//ATPase-coupled transmembrane transporter activity	GO:0006810//transport;GO:0006817//phosphate ion transport;GO:0006869//lipid transport;GO:0007186//G protein-coupled receptor signaling pathway	--
Unigene0000697	1.1	1.089	0.81	0	0.318	0	At4g34215	XP_006342719.1 PREDICTED: probable carbohydrate esterase At4g34215 [Solanum tuberosum]	-	-	-	-	-	-	-	--
Unigene0000698	0	0	0.495	0	0	0	At4g34215	XP_016476672.1 PREDICTED: probable carbohydrate esterase At4g34215 [Nicotiana tabacum]	-	-	-	-	-	-	GO:0042742//defense response to bacterium	--
Unigene0000699	0	0	0.27	0.343	0	0	At1g61500	KAF3653037.1 G-type lectin S-receptor-like serine/threonine-protein kinase [Capsicum annuum]	-	-	-	-	-	GO:0004672//protein kinase activity;GO:0005524//ATP binding	GO:0005975//carbohydrate metabolic process;GO:0006468//protein phosphorylation;GO:0009307//DNA restriction-modification system	--
Unigene0000700	0	0	0	1.315	3.633	0.587	--	TMW98881.1 hypothetical protein EJD97_003360 [Solanum chilense]	-	-	-	-	-	-	-	--
Unigene0000701	4.194	5.191	9.986	140.175	158.908	162.091	SGPP	XP_015169502.1 PREDICTED: haloacid dehalogenase-like hydrolase domain-containing protein Sgpp isoform X1 [Solanum tuberosum]	-	-	-	-	-	GO:0008801//beta-phosphoglucomutase activity;GO:0008967//phosphoglycolate phosphatase activity;GO:0016787//hydrolase activity;GO:0016827//hydrolase activity, acting on acid carbon-phosphorus bonds;GO:0018784//(S)-2-haloacid dehalogenase activity	GO:0006805//xenobiotic metabolic process;GO:0008152//metabolic process;GO:0009636//response to toxic substance;GO:0009853//photorespiration;GO:0019635//2-aminoethylphosphonate catabolic process;GO:0019636//phosphonoacetate metabolic process;GO:0019700//organic phosphonate catabolic process;GO:0043094//cellular metabolic compound salvage;GO:0046352//disaccharide catabolic process	--
Unigene0000703	8.427	9.077	8.669	32.435	37.182	34.318	--	XP_016550718.1 PREDICTED: uncharacterized protein LOC107850596 [Capsicum annuum]	-	-	-	-	-	-	-	--
Unigene0000704	0	0	0.48	0	0.165	0.459	--	XP_006361347.1 PREDICTED: uncharacterized protein LOC102588968 isoform X3 [Solanum tuberosum]	-	-	-	-	-	-	-	--
Unigene0000705	1.191	1.225	1.388	0.93	1.536	1.18	--	PHU04062.1 hypothetical protein BC332_24884 [Capsicum chinense]	-	-	-	-	-	-	-	--
Unigene0000706	0	0	0	0	0.36	0	--	-	-	-	-	-	-	-	-	--
Unigene0000707	0.826	0.204	0	0.441	0.954	0	--	-	-	-	-	-	-	-	-	--
Unigene0000709	0.226	0.224	0.19	0	0.522	0	--	XP_019240838.1 PREDICTED: uncharacterized protein LOC109220825 [Nicotiana attenuata]	-	-	-	-	-	-	-	--
Unigene0000711	0.205	0.27	0.747	0.073	0.158	0.439	--	OIT39198.1 hypothetical protein A4A49_22557, partial [Nicotiana attenuata]	-	-	-	-	-	-	-	--
Unigene0000712	0	0	0	0.278	0	0	--	XP_025884104.1 uncharacterized protein LOC101249139 [Solanum lycopersicum]	-	-	-	-	-	-	-	--
Unigene0000713	0.243	0.562	0.41	1.387	1.5	4.004	At1g61340	PHT56118.1 hypothetical protein CQW23_04604 [Capsicum baccatum]	-	-	-	-	-	GO:0005515//protein binding	-	--
Unigene0000715	0	0	0	0	0.406	0	--	-	-	-	-	-	-	-	-	--
Unigene0000716	0.711	1.408	0.838	0.456	0.986	0.458	--	PHT58538.1 Vacuolar protein sorting-associated protein 53 A [Capsicum baccatum]	-	-	-	-	GO:0005575//cellular_component;GO:0005622//intracellular anatomical structure;GO:0005737//cytoplasm;GO:0005783//endoplasmic reticulum;GO:0012505//endomembrane system;GO:0043226//organelle;GO:0043227//membrane-bounded organelle;GO:0043229//intracellular organelle;GO:0043231//intracellular membrane-bounded organelle	GO:0003674//molecular_function;GO:0003756//protein disulfide isomerase activity;GO:0003824//catalytic activity;GO:0016853//isomerase activity;GO:0016860//intramolecular oxidoreductase activity;GO:0016864//intramolecular oxidoreductase activity, transposing S-S bonds;GO:0140096//catalytic activity, acting on a protein	GO:0006457//protein folding;GO:0006950//response to stress;GO:0008150//biological_process;GO:0009987//cellular process;GO:0019725//cellular homeostasis;GO:0033554//cellular response to stress;GO:0034976//response to endoplasmic reticulum stress;GO:0042592//homeostatic process;GO:0045454//cell redox homeostasis;GO:0050789//regulation of biological process;GO:0050794//regulation of cellular process…	--
Unigene0000717	13.274	12.633	15.296	33.404	35.82	32.717	RBP2	XP_009776008.1 PREDICTED: protein MATERNALLY EXPRESSED GENE 5-like isoform X4 [Nicotiana sylvestris]	-	-	-	-	-	GO:0003676//nucleic acid binding	-	--
Unigene0000719	0	0.731	0	0	0	0	--	-	-	-	-	-	-	-	-	--
Unigene0000721	0	0.161	0.41	0.347	0	1.22	--	-	-	-	-	-	-	-	-	--
Unigene0000722	0.766	0.379	0.753	0	0	1.097	--	-	-	-	-	-	-	-	-	--
Unigene0000723	20.347	19.528	23.065	20.568	22.26	22	--	XP_010320299.1 uncharacterized protein LOC101254993 [Solanum lycopersicum]	-	-	-	-	GO:0005575//cellular_component;GO:0005622//intracellular anatomical structure;GO:0005634//nucleus;GO:0005654//nucleoplasm;GO:0031974//membrane-enclosed lumen;GO:0031981//nuclear lumen;GO:0032991//protein-containing complex;GO:0043226//organelle;GO:0043227//membrane-bounded organelle;GO:0043229//intracellular organelle;GO:0043231//intracellular membrane-bounded organelle;GO:0043233//organelle lume…	GO:0003674//molecular_function;GO:0003676//nucleic acid binding;GO:0005488//binding;GO:0005515//protein binding;GO:0032182//ubiquitin-like protein binding;GO:0043130//ubiquitin binding	GO:0006139//nucleobase-containing compound metabolic process;GO:0006259//DNA metabolic process;GO:0006281//DNA repair;GO:0006304//DNA modification;GO:0006307//DNA dealkylation involved in DNA repair;GO:0006351//transcription, DNA-templated;GO:0006355//regulation of transcription, DNA-templated;GO:0006725//cellular aromatic compound metabolic process;GO:0006807//nitrogen compound metabolic process…	--
Unigene0000724	0.2	0	0.169	0.214	0.695	0	--	-	-	-	-	-	-	-	-	--
Unigene0000725	25.575	22.726	27.209	15.483	16.461	17.561	SMC3	XP_006361123.1 PREDICTED: structural maintenance of chromosomes protein 3 [Solanum tuberosum]	-	-	-	-	GO:0000228//nuclear chromosome;GO:0000775//chromosome, centromeric region;GO:0000779//condensed chromosome, centromeric region;GO:0000785//chromatin;GO:0000793//condensed chromosome;GO:0000794//condensed nuclear chromosome;GO:0000795//synaptonemal complex;GO:0000798//nuclear cohesin complex;GO:0000800//lateral element;GO:0000922//spindle pole;GO:0005575//cellular_component;GO:0005576//extracellul…	GO:0000166//nucleotide binding;GO:0003674//molecular_function;GO:0003676//nucleic acid binding;GO:0003677//DNA binding;GO:0003682//chromatin binding;GO:0003690//double-stranded DNA binding;GO:0003774//cytoskeletal motor activity;GO:0003777//microtubule motor activity;GO:0003824//catalytic activity;GO:0004672//protein kinase activity;GO:0004674//protein serine/threonine kinase activity;GO:0005488/…	GO:0000003//reproduction;GO:0000070//mitotic sister chromatid segregation;GO:0000278//mitotic cell cycle;GO:0000280//nuclear division;GO:0000724//double-strand break repair via homologous recombination;GO:0000725//recombinational repair;GO:0000819//sister chromatid segregation;GO:0001736//establishment of planar polarity;GO:0001737//establishment of imaginal disc-derived wing hair orientation;GO:…	--
Unigene0000726	0.576	0	0.485	0	0	0	--	-	-	-	-	-	-	-	-	--
Unigene0000727	0	0	0.4	0	0	0.255	--	-	-	-	-	-	-	-	-	--
Unigene0000728	5.96	8.527	8.852	2.902	1.731	2.244	NUDT17	XP_016459973.1 PREDICTED: nudix hydrolase 18, mitochondrial-like [Nicotiana tabacum]	-	-	-	-	GO:0005575//cellular_component;GO:0005622//intracellular anatomical structure;GO:0005634//nucleus;GO:0005737//cytoplasm;GO:0005739//mitochondrion;GO:0043226//organelle;GO:0043227//membrane-bounded organelle;GO:0043229//intracellular organelle;GO:0043231//intracellular membrane-bounded organelle	GO:0003674//molecular_function;GO:0003824//catalytic activity;GO:0005488//binding;GO:0016787//hydrolase activity;GO:0016817//hydrolase activity, acting on acid anhydrides;GO:0016818//hydrolase activity, acting on acid anhydrides, in phosphorus-containing anhydrides;GO:0017111//nucleoside-triphosphatase activity;GO:0043167//ion binding;GO:0043169//cation binding;GO:0046872//metal ion binding	GO:0006139//nucleobase-containing compound metabolic process	--
Unigene0000729	0.133	0.263	1.791	0.711	0.154	0.143	--	KAH0760290.1 hypothetical protein KY290_023783 [Solanum tuberosum]	-	-	-	-	-	-	-	--
Unigene0000731	0	0	0	1.149	0	0	--	-	-	-	-	-	-	-	-	--
Unigene0000732	0.367	0.726	0	0	0	0.197	--	-	-	-	-	-	-	-	-	--
Unigene0000733	2.988	3.473	4.949	2.847	3.378	2.789	ndhB1	KAH0733454.1 hypothetical protein KY289_004642 [Solanum tuberosum]	-	-	-	-	-	-	-	--
Unigene0000734	347.786	336.982	326.363	33.144	25.821	27.275	LOX2.1	XP_019239420.1 PREDICTED: linoleate 13S-lipoxygenase 2-1, chloroplastic-like [Nicotiana attenuata]	Metabolism;Metabolism;Metabolism;Metabolism	Global and overview maps;Global and overview maps;Lipid metabolism;Lipid metabolism	ko01100//Metabolic pathways;ko01110//Biosynthesis of secondary metabolites;ko00592//alpha-Linolenic acid metabolism;ko00591//Linoleic acid metabolism	K00454;K00454;K00454;K00454	-	GO:0005515//protein binding;GO:0016702//oxidoreductase activity, acting on single donors with incorporation of molecular oxygen, incorporation of two atoms of oxygen;GO:0046872//metal ion binding	-	--
Unigene0000736	2.755	2.438	2.003	1.294	2.412	1.658	--	XP_006338026.2 PREDICTED: probable rhamnogalacturonate lyase B [Solanum tuberosum]	-	-	-	-	-	GO:0090729//toxin activity	-	--
Unigene0000737	0.554	0	0.622	0	0	0	--	KAF3657761.1 putative oligopeptide transporter 4-like [Capsicum annuum]	-	-	-	-	-	-	-	--
Unigene0000738	0	0	0	0.291	0	0	--	-	-	-	-	-	GO:0016020//membrane	GO:0022857//transmembrane transporter activity	GO:0055085//transmembrane transport	--
Unigene0000740	32.439	36.661	24.888	2.853	1.819	1.102	PNSB3	XP_009758905.1 PREDICTED: uncharacterized protein LOC104211534 [Nicotiana sylvestris]	-	-	-	-	GO:0005739//mitochondrion	GO:0003954//NADH dehydrogenase activity;GO:0008137//NADH dehydrogenase (ubiquinone) activity;GO:0009055//electron transfer activity;GO:0051536//iron-sulfur cluster binding	-	--
Unigene0000741	0.556	0	0.234	0.297	0	0	--	-	-	-	-	-	-	-	-	--
Unigene0000742	4.246	3.672	3.62	1.838	1.739	1.616	PCMP-E8	XP_009604837.1 pentatricopeptide repeat-containing protein At5g61800 [Nicotiana tomentosiformis]	-	-	-	-	GO:0005575//cellular_component;GO:0005622//intracellular anatomical structure;GO:0043226//organelle;GO:0043227//membrane-bounded organelle;GO:0043229//intracellular organelle;GO:0043231//intracellular membrane-bounded organelle	GO:0003674//molecular_function;GO:0003676//nucleic acid binding;GO:0003723//RNA binding;GO:0003824//catalytic activity;GO:0004518//nuclease activity;GO:0004519//endonuclease activity;GO:0005488//binding;GO:0016787//hydrolase activity;GO:0016788//hydrolase activity, acting on ester bonds;GO:0097159//organic cyclic compound binding;GO:1901363//heterocyclic compound binding	GO:0006139//nucleobase-containing compound metabolic process;GO:0006725//cellular aromatic compound metabolic process;GO:0006807//nitrogen compound metabolic process;GO:0008150//biological_process;GO:0008152//metabolic process;GO:0009451//RNA modification;GO:0009987//cellular process;GO:0016070//RNA metabolic process;GO:0034641//cellular nitrogen compound metabolic process;GO:0043170//macromolecu…	--
Unigene0000743	0.47	0.465	0.791	0	0	0	--	-	-	-	-	-	-	-	-	--
Unigene0000744	0	0	0.267	0	0	0	--	-	-	-	-	-	-	-	-	--
Unigene0000746	0.084	0.331	0.07	0.983	0.29	1.616	ACT11	KAF8404418.1 hypothetical protein HHK36_009303 [Tetracentron sinense]	-	-	-	-	-	-	-	--
Unigene0000747	63.128	97.882	75.079	40.474	34.571	40.318	AC58	XP_009621805.1 actin-like [Nicotiana tomentosiformis]	-	-	-	-	GO:0005575//cellular_component;GO:0005622//intracellular anatomical structure;GO:0005737//cytoplasm;GO:0005856//cytoskeleton;GO:0043226//organelle;GO:0043228//non-membrane-bounded organelle;GO:0043229//intracellular organelle;GO:0043232//intracellular non-membrane-bounded organelle	GO:0000166//nucleotide binding;GO:0003674//molecular_function;GO:0005488//binding;GO:0005524//ATP binding;GO:0017076//purine nucleotide binding;GO:0030554//adenyl nucleotide binding;GO:0032553//ribonucleotide binding;GO:0032555//purine ribonucleotide binding;GO:0032559//adenyl ribonucleotide binding;GO:0035639//purine ribonucleoside triphosphate binding;GO:0036094//small molecule binding;GO:00431…	-	--
Unigene0000748	0.163	0.483	0.137	1.043	0.94	1.222	ACT1	AEY76080.1 actin, partial [Petunia integrifolia subsp. inflata] [Petunia integrifolia]	-	-	-	-	GO:0005575//cellular_component;GO:0005622//intracellular anatomical structure;GO:0005737//cytoplasm;GO:0005856//cytoskeleton;GO:0043226//organelle;GO:0043228//non-membrane-bounded organelle;GO:0043229//intracellular organelle;GO:0043232//intracellular non-membrane-bounded organelle	GO:0000166//nucleotide binding;GO:0003674//molecular_function;GO:0005488//binding;GO:0005524//ATP binding;GO:0017076//purine nucleotide binding;GO:0030554//adenyl nucleotide binding;GO:0032553//ribonucleotide binding;GO:0032555//purine ribonucleotide binding;GO:0032559//adenyl ribonucleotide binding;GO:0035639//purine ribonucleoside triphosphate binding;GO:0036094//small molecule binding;GO:00431…	-	--
Unigene0000750	0	0	0.774	0.164	0	0.987	AC75	PHU06834.1 Actin-1 [Capsicum chinense]	-	-	-	-	-	-	-	--
Unigene0000751	9.319	7.871	11.306	26.589	30.517	30.773	MKP1	KAF3652952.1 Protein-tyrosine-phosphatase MKP1 [Capsicum annuum]	-	-	-	-	GO:0005575//cellular_component;GO:0005622//intracellular anatomical structure;GO:0005634//nucleus;GO:0043226//organelle;GO:0043227//membrane-bounded organelle;GO:0043229//intracellular organelle;GO:0043231//intracellular membrane-bounded organelle	GO:0003674//molecular_function;GO:0003824//catalytic activity;GO:0004721//phosphoprotein phosphatase activity;GO:0004722//protein serine/threonine phosphatase activity;GO:0004725//protein tyrosine phosphatase activity;GO:0008138//protein tyrosine/serine/threonine phosphatase activity;GO:0008330//protein tyrosine/threonine phosphatase activity;GO:0016787//hydrolase activity;GO:0016788//hydrolase a…	GO:0001704//formation of primary germ layer;GO:0001706//endoderm formation;GO:0001932//regulation of protein phosphorylation;GO:0001933//negative regulation of protein phosphorylation;GO:0006464//cellular protein modification process;GO:0006469//negative regulation of protein kinase activity;GO:0006470//protein dephosphorylation;GO:0006793//phosphorus metabolic process;GO:0006796//phosphate-conta…	--
Unigene0000752	0	0	0.817	0.208	0	0	--	-	-	-	-	-	-	-	-	--
Unigene0000754	0	0	0.315	0.6	0.649	0	--	-	-	-	-	-	-	-	-	--
Unigene0000755	15.3	19.453	18.734	60.398	61.888	54.684	TOM6	XP_009596562.1 mitochondrial import receptor subunit TOM6 homolog [Nicotiana tomentosiformis]	-	-	-	-	-	-	-	--
Unigene0000756	0.838	2.489	1.27	1.612	0	0	RPS12	CBJ28519.1 ribosomal protein S12 [Ectocarpus siliculosus]	Genetic Information Processing	Translation	ko03010//Ribosome	K02951	-	-	-	--
Unigene0000757	4.256	2.912	3.713	3.143	1.968	1.412	AUX22E	PHT86790.1 Auxin-induced protein 22D [Capsicum annuum]	Environmental Information Processing	Signal transduction	ko04075//Plant hormone signal transduction	K14484	-	-	-	--
Unigene0000758	0.295	0.876	0.435	0.631	0.853	0.95	--	XP_016550317.1 PREDICTED: U11/U12 small nuclear ribonucleoprotein 31 kDa protein [Capsicum annuum]	-	-	-	-	-	-	-	--
Unigene0000759	10.631	10.746	11.311	18.386	20.392	19.654	--	XP_015064095.1 uncharacterized protein LOC107009300 [Solanum pennellii]	-	-	-	-	-	-	-	--
Unigene0000760	0.484	0.719	0.408	0	0	0	--	-	-	-	-	-	-	-	-	--
Unigene0000761	5.004	4.289	5.561	4.883	5.143	5.626	DGAT1A	KAG5595923.1 hypothetical protein H5410_037155 [Solanum commersonii]	Metabolism;Metabolism	Global and overview maps;Lipid metabolism	ko01100//Metabolic pathways;ko00561//Glycerolipid metabolism	K11155;K11155	-	-	-	--
Unigene0000762	6.201	6.78	9.958	20.461	16.074	17.932	DGAT1	XP_004251677.1 diacylglycerol O-acyltransferase 1A isoform X1 [Solanum lycopersicum]	Metabolism;Metabolism	Global and overview maps;Lipid metabolism	ko01100//Metabolic pathways;ko00561//Glycerolipid metabolism	K11155;K11155	-	-	-	--
Unigene0000763	8.869	8.692	9.256	6.429	6.143	7.271	MED19A	XP_015160564.1 PREDICTED: mediator of RNA polymerase II transcription subunit 19a-like [Solanum tuberosum]	-	-	-	-	-	-	-	--
Unigene0000764	1.923	0.975	2.211	0.752	1.41	1.058	At3g11320	XP_016573371.1 PREDICTED: probable sugar phosphate/phosphate translocator At3g11320 [Capsicum annuum]	-	-	-	-	-	-	-	--
Unigene0000765	0.216	0.428	0.364	0	1.748	0	--	-	-	-	-	-	-	-	-	--
Unigene0000766	0.217	0.645	0.183	0	0.502	0.699	--	-	-	-	-	-	-	-	-	--
Unigene0000767	5.048	4.052	5.923	2.412	3.337	4.023	NRAMP1	PNT37312.1 hypothetical protein POPTR_005G181000 [Populus trichocarpa]	-	-	-	-	GO:0016020//membrane	GO:0046873//metal ion transmembrane transporter activity	GO:0030001//metal ion transport	--
Unigene0000768	24.691	28.895	25.655	46.326	61.962	57.46	--	KAH0715475.1 hypothetical protein KY284_008380 [Solanum tuberosum]	Genetic Information Processing;Genetic Information Processing;Genetic Information Processing	Replication and repair;Replication and repair;Replication and repair	ko03420//Nucleotide excision repair;ko03030//DNA replication;ko03410//Base excision repair	K02326;K02326;K02326	GO:0000123//histone acetyltransferase complex;GO:0000228//nuclear chromosome;GO:0000785//chromatin;GO:0005575//cellular_component;GO:0005622//intracellular anatomical structure;GO:0005634//nucleus;GO:0005654//nucleoplasm;GO:0005657//replication fork;GO:0005694//chromosome;GO:0008622//epsilon DNA polymerase complex;GO:0008623//CHRAC;GO:0031010//ISWI-type complex;GO:0031248//protein acetyltransfera…	GO:0003674//molecular_function;GO:0003676//nucleic acid binding;GO:0003677//DNA binding;GO:0003682//chromatin binding;GO:0003690//double-stranded DNA binding;GO:0003697//single-stranded DNA binding;GO:0003824//catalytic activity;GO:0003887//DNA-directed DNA polymerase activity;GO:0004518//nuclease activity;GO:0004527//exonuclease activity;GO:0004529//exodeoxyribonuclease activity;GO:0004536//deox…	GO:0000082//G1/S transition of mitotic cell cycle;GO:0000278//mitotic cell cycle;GO:0000731//DNA synthesis involved in DNA repair;GO:0006139//nucleobase-containing compound metabolic process;GO:0006259//DNA metabolic process;GO:0006260//DNA replication;GO:0006261//DNA-dependent DNA replication;GO:0006270//DNA replication initiation;GO:0006271//DNA strand elongation involved in DNA replication;GO:…	NF-YB
Unigene0000769	12.337	12.747	12.342	9.365	12.192	7.869	--	XP_019236184.1 PREDICTED: DNA polymerase epsilon subunit 3-like [Nicotiana attenuata]	Genetic Information Processing;Genetic Information Processing;Genetic Information Processing	Replication and repair;Replication and repair;Replication and repair	ko03420//Nucleotide excision repair;ko03030//DNA replication;ko03410//Base excision repair	K02326;K02326;K02326	GO:0000123//histone acetyltransferase complex;GO:0000228//nuclear chromosome;GO:0000785//chromatin;GO:0005575//cellular_component;GO:0005622//intracellular anatomical structure;GO:0005634//nucleus;GO:0005654//nucleoplasm;GO:0005657//replication fork;GO:0005694//chromosome;GO:0008622//epsilon DNA polymerase complex;GO:0008623//CHRAC;GO:0031010//ISWI-type complex;GO:0031248//protein acetyltransfera…	GO:0003674//molecular_function;GO:0003676//nucleic acid binding;GO:0003677//DNA binding;GO:0003682//chromatin binding;GO:0003690//double-stranded DNA binding;GO:0003697//single-stranded DNA binding;GO:0003824//catalytic activity;GO:0003887//DNA-directed DNA polymerase activity;GO:0004518//nuclease activity;GO:0004527//exonuclease activity;GO:0004529//exodeoxyribonuclease activity;GO:0004536//deox…	GO:0000082//G1/S transition of mitotic cell cycle;GO:0000278//mitotic cell cycle;GO:0000731//DNA synthesis involved in DNA repair;GO:0006139//nucleobase-containing compound metabolic process;GO:0006259//DNA metabolic process;GO:0006260//DNA replication;GO:0006261//DNA-dependent DNA replication;GO:0006270//DNA replication initiation;GO:0006271//DNA strand elongation involved in DNA replication;GO:…	NF-YB
Unigene0000770	7.861	7.395	8.429	13.068	13.269	12.236	--	XP_018630481.1 uncharacterized protein LOC104108553 isoform X2 [Nicotiana tomentosiformis]	-	-	-	-	-	-	-	--
Unigene0000772	0	0	0.438	0.556	0.902	0	AGAL2	AZA15164.1 alpha-galactosidase [Lycium barbarum]	Metabolism;Metabolism;Metabolism;Metabolism;Metabolism	Global and overview maps;Lipid metabolism;Carbohydrate metabolism;Lipid metabolism;Glycan biosynthesis and metabolism	ko01100//Metabolic pathways;ko00561//Glycerolipid metabolism;ko00052//Galactose metabolism;ko00600//Sphingolipid metabolism;ko00603//Glycosphingolipid biosynthesis - globo and isoglobo series	K07407;K07407;K07407;K07407;K07407	GO:0005575//cellular_component;GO:0005576//extracellular region;GO:0005618//cell wall;GO:0009505//plant-type cell wall;GO:0030312//external encapsulating structure;GO:0048046//apoplast;GO:0071944//cell periphery	GO:0003674//molecular_function;GO:0003824//catalytic activity;GO:0004553//hydrolase activity, hydrolyzing O-glycosyl compounds;GO:0004557//alpha-galactosidase activity;GO:0015925//galactosidase activity;GO:0016787//hydrolase activity;GO:0016798//hydrolase activity, acting on glycosyl bonds;GO:0052692//raffinose alpha-galactosidase activity	GO:0005975//carbohydrate metabolic process;GO:0007275//multicellular organism development;GO:0008150//biological_process;GO:0008152//metabolic process;GO:0009605//response to external stimulus;GO:0009607//response to biotic stimulus;GO:0009620//response to fungus;GO:0009653//anatomical structure morphogenesis;GO:0009909//regulation of flower development;GO:0009911//positive regulation of flower d…	--
Unigene0000773	5.246	8.193	9.15	21.965	23.625	28.793	AGAL2	AZA15164.1 alpha-galactosidase [Lycium barbarum]	Metabolism;Metabolism;Metabolism;Metabolism;Metabolism	Global and overview maps;Lipid metabolism;Carbohydrate metabolism;Lipid metabolism;Glycan biosynthesis and metabolism	ko01100//Metabolic pathways;ko00561//Glycerolipid metabolism;ko00052//Galactose metabolism;ko00600//Sphingolipid metabolism;ko00603//Glycosphingolipid biosynthesis - globo and isoglobo series	K07407;K07407;K07407;K07407;K07407	GO:0005575//cellular_component;GO:0005576//extracellular region;GO:0005618//cell wall;GO:0009505//plant-type cell wall;GO:0030312//external encapsulating structure;GO:0048046//apoplast;GO:0071944//cell periphery	GO:0003674//molecular_function;GO:0003824//catalytic activity;GO:0004553//hydrolase activity, hydrolyzing O-glycosyl compounds;GO:0004557//alpha-galactosidase activity;GO:0015925//galactosidase activity;GO:0016787//hydrolase activity;GO:0016798//hydrolase activity, acting on glycosyl bonds;GO:0052692//raffinose alpha-galactosidase activity	GO:0005975//carbohydrate metabolic process;GO:0007275//multicellular organism development;GO:0008150//biological_process;GO:0008152//metabolic process;GO:0009605//response to external stimulus;GO:0009607//response to biotic stimulus;GO:0009620//response to fungus;GO:0009653//anatomical structure morphogenesis;GO:0009909//regulation of flower development;GO:0009911//positive regulation of flower d…	--
Unigene0000776	0.371	0	1.094	0	0.643	0	--	-	-	-	-	-	-	-	-	--
Unigene0000777	0	0.348	0.591	0.375	0.406	0.377	HCR9-0	PHT67044.1 hypothetical protein T459_31469 [Capsicum annuum]	-	-	-	-	-	GO:0005515//protein binding	-	--
Unigene0000778	0.653	0.924	2.12	0.997	0.647	1.202	HCR9-0	KAH0733709.1 hypothetical protein KY285_009416 [Solanum tuberosum]	-	-	-	-	-	GO:0005515//protein binding	-	--
Unigene0000779	0	0	0	3.214	0.217	1.11	RLP43	PHU14055.1 hypothetical protein BC332_15260 [Capsicum chinense]	-	-	-	-	-	GO:0005515//protein binding	-	--
Unigene0000781	1.098	0	0	0	0.635	0	--	-	-	-	-	-	-	-	-	--
Unigene0000782	0.273	0.676	0.689	0.438	0.315	0	--	-	-	-	-	-	-	-	-	--
Unigene0000783	0.723	0.477	0.405	0.772	1.392	0	--	-	-	-	-	-	-	-	-	--
Unigene0000785	0.456	0.451	0	0.325	0.878	0	rps19	YP_009129385.1 ribosomal protein S19 [Cypripedium formosanum]	Genetic Information Processing	Translation	ko03010//Ribosome	K02965	GO:0000313//organellar ribosome;GO:0000314//organellar small ribosomal subunit;GO:0005575//cellular_component;GO:0005622//intracellular anatomical structure;GO:0005737//cytoplasm;GO:0005739//mitochondrion;GO:0005759//mitochondrial matrix;GO:0005761//mitochondrial ribosome;GO:0005763//mitochondrial small ribosomal subunit;GO:0005829//cytosol;GO:0005840//ribosome;GO:0009507//chloroplast;GO:0009536/…	GO:0003674//molecular_function;GO:0003676//nucleic acid binding;GO:0003723//RNA binding;GO:0003735//structural constituent of ribosome;GO:0005198//structural molecule activity;GO:0005488//binding;GO:0019843//rRNA binding;GO:0097159//organic cyclic compound binding;GO:1901363//heterocyclic compound binding	GO:0000028//ribosomal small subunit assembly;GO:0006412//translation;GO:0006518//peptide metabolic process;GO:0006807//nitrogen compound metabolic process;GO:0006996//organelle organization;GO:0008150//biological_process;GO:0008152//metabolic process;GO:0009058//biosynthetic process;GO:0009059//macromolecule biosynthetic process;GO:0009987//cellular process;GO:0010467//gene expression;GO:0016043/…	--
Unigene0000786	6.283	3.66	4.356	2.568	4.912	3.967	--	-	-	-	-	-	-	-	-	--
Unigene0000787	0.925	0.567	1.001	0.424	0.204	0.378	--	-	-	-	-	-	-	-	-	--
Unigene0000788	0.858	0	0	0	0	0.23	--	-	-	-	-	-	-	-	-	--
Unigene0000789	0	0	0	0	0	1.103	--	-	-	-	-	-	-	-	-	--
Unigene0000790	32.735	32.432	39.417	54.397	57.116	54.026	XPO1	XP_009764334.1 PREDICTED: exportin-1-like isoform X2 [Nicotiana sylvestris]	Genetic Information Processing;Genetic Information Processing	Translation;Translation	ko03013//Nucleocytoplasmic transport;ko03008//Ribosome biogenesis in eukaryotes	K14290;K14290	-	GO:0005049//nuclear export signal receptor activity;GO:0031267//small GTPase binding	GO:0006886//intracellular protein transport	--
Unigene0000791	0	0	0	0	0.596	0	ZOX1	XP_016508130.1 PREDICTED: zeatin O-glucosyltransferase-like [Nicotiana tabacum]	Metabolism;Metabolism	Global and overview maps;Metabolism of terpenoids and polyketides	ko01110//Biosynthesis of secondary metabolites;ko00908//Zeatin biosynthesis	K13495;K13495	-	GO:0008194//UDP-glycosyltransferase activity;GO:0047688//aspartate 4-decarboxylase activity	GO:0006531//aspartate metabolic process	--
Unigene0000792	0	0.105	0	0.796	0.737	1.37	ZOG1	KAH0721266.1 hypothetical protein KY284_006296 [Solanum tuberosum]	Metabolism;Metabolism	Global and overview maps;Metabolism of terpenoids and polyketides	ko01110//Biosynthesis of secondary metabolites;ko00908//Zeatin biosynthesis	K13495;K13495	-	GO:0008194//UDP-glycosyltransferase activity	-	--
Unigene0000793	0.164	0.162	0.046	7.18	6.754	4.045	ZOG1	XP_009760629.1 PREDICTED: zeatin O-glucosyltransferase-like [Nicotiana sylvestris]	Metabolism;Metabolism	Global and overview maps;Metabolism of terpenoids and polyketides	ko01110//Biosynthesis of secondary metabolites;ko00908//Zeatin biosynthesis	K13495;K13495	-	GO:0008194//UDP-glycosyltransferase activity	-	--
Unigene0000794	34.706	29.282	29.327	23.027	25.304	17.757	AAP7	TMW95516.1 hypothetical protein EJD97_008713 [Solanum chilense]	-	-	-	-	GO:0005887//integral component of plasma membrane	GO:0015173//aromatic amino acid transmembrane transporter activity	GO:0003333//amino acid transmembrane transport;GO:0015801//aromatic amino acid transport	--
Unigene0000795	18.599	11.103	26.357	83.569	84.033	79.594	AAP3	PHT45217.1 Amino acid permease 5 [Capsicum baccatum]	-	-	-	-	-	-	-	--
Unigene0000796	9.785	11.023	8.771	3.049	2.427	3.275	AAP3	XP_016483715.1 PREDICTED: amino acid permease 3-like [Nicotiana tabacum]	-	-	-	-	GO:0016021//integral component of membrane	-	GO:0015990//electron transport coupled proton transport	--
Unigene0000798	2.581	2.949	3.844	1.061	1.606	0.426	--	-	-	-	-	-	-	-	-	--
Unigene0000799	2.257	2.347	2.043	4.524	4.305	5.391	HSP15.7	XP_006346757.1 PREDICTED: 15.7 kDa heat shock protein, peroxisomal [Solanum tuberosum]	Genetic Information Processing	Folding, sorting and degradation	ko04141//Protein processing in endoplasmic reticulum	K13993	GO:0005575//cellular_component;GO:0005622//intracellular anatomical structure;GO:0005737//cytoplasm;GO:0005777//peroxisome;GO:0005782//peroxisomal matrix;GO:0031907//microbody lumen;GO:0031974//membrane-enclosed lumen;GO:0042579//microbody;GO:0043226//organelle;GO:0043227//membrane-bounded organelle;GO:0043229//intracellular organelle;GO:0043231//intracellular membrane-bounded organelle;GO:004323…	-	GO:0000302//response to reactive oxygen species;GO:0006457//protein folding;GO:0006950//response to stress;GO:0006979//response to oxidative stress;GO:0008150//biological_process;GO:0009266//response to temperature stimulus;GO:0009408//response to heat;GO:0009628//response to abiotic stimulus;GO:0009987//cellular process;GO:0042221//response to chemical;GO:0050896//response to stimulus;GO:1901700…	--
Unigene0000801	4.262	4.58	6.947	4.265	3.983	4.575	--	XP_009771059.1 PREDICTED: uncharacterized protein LOC104221652 [Nicotiana sylvestris]	-	-	-	-	GO:0005887//integral component of plasma membrane	GO:0008028//monocarboxylic acid transmembrane transporter activity	GO:0015718//monocarboxylic acid transport	--
Unigene0000802	16.713	18.607	16.533	2.766	2.451	3.871	CRSH	XP_019257454.1 PREDICTED: probable GTP diphosphokinase CRSH, chloroplastic [Nicotiana attenuata]	Metabolism;Metabolism	Global and overview maps;Nucleotide metabolism	ko01100//Metabolic pathways;ko00230//Purine metabolism	K00951;K00951	GO:0005575//cellular_component;GO:0005622//intracellular anatomical structure;GO:0005737//cytoplasm;GO:0009507//chloroplast;GO:0009536//plastid;GO:0043226//organelle;GO:0043227//membrane-bounded organelle;GO:0043229//intracellular organelle;GO:0043231//intracellular membrane-bounded organelle	GO:0000166//nucleotide binding;GO:0001882//nucleoside binding;GO:0001883//purine nucleoside binding;GO:0003674//molecular_function;GO:0003824//catalytic activity;GO:0005488//binding;GO:0005509//calcium ion binding;GO:0005524//ATP binding;GO:0005525//GTP binding;GO:0008728//GTP diphosphokinase activity;GO:0016301//kinase activity;GO:0016740//transferase activity;GO:0016772//transferase activity, t…	GO:0006139//nucleobase-containing compound metabolic process;GO:0006163//purine nucleotide metabolic process;GO:0006164//purine nucleotide biosynthetic process;GO:0006725//cellular aromatic compound metabolic process;GO:0006753//nucleoside phosphate metabolic process;GO:0006793//phosphorus metabolic process;GO:0006796//phosphate-containing compound metabolic process;GO:0006807//nitrogen compound …	--
Unigene0000803	0.973	1.606	1.707	0.433	0.281	0.435	--	-	-	-	-	-	-	-	-	--
Unigene0000804	1.268	0.793	1.46	0.571	0	0.072	CRSH1	XP_016551642.1 PREDICTED: probable GTP diphosphokinase CRSH, chloroplastic [Capsicum annuum]	Metabolism;Metabolism	Global and overview maps;Nucleotide metabolism	ko01100//Metabolic pathways;ko00230//Purine metabolism	K00951;K00951	GO:0005575//cellular_component;GO:0005622//intracellular anatomical structure;GO:0005737//cytoplasm;GO:0009507//chloroplast;GO:0009536//plastid;GO:0043226//organelle;GO:0043227//membrane-bounded organelle;GO:0043229//intracellular organelle;GO:0043231//intracellular membrane-bounded organelle	GO:0000166//nucleotide binding;GO:0001882//nucleoside binding;GO:0001883//purine nucleoside binding;GO:0003674//molecular_function;GO:0003824//catalytic activity;GO:0005488//binding;GO:0005509//calcium ion binding;GO:0005524//ATP binding;GO:0005525//GTP binding;GO:0008728//GTP diphosphokinase activity;GO:0016301//kinase activity;GO:0016740//transferase activity;GO:0016772//transferase activity, t…	GO:0006139//nucleobase-containing compound metabolic process;GO:0006163//purine nucleotide metabolic process;GO:0006164//purine nucleotide biosynthetic process;GO:0006725//cellular aromatic compound metabolic process;GO:0006753//nucleoside phosphate metabolic process;GO:0006793//phosphorus metabolic process;GO:0006796//phosphate-containing compound metabolic process;GO:0006807//nitrogen compound …	--
Unigene0000806	30.3	27.85	42.472	21.076	26.306	30.815	PH1	XP_019245311.1 PREDICTED: pleckstrin homology domain-containing protein 1-like [Nicotiana attenuata]	-	-	-	-	-	GO:0000030//mannosyltransferase activity	-	--
Unigene0000807	0.28	0.831	0.236	0	0.323	0.451	--	-	-	-	-	-	-	-	-	--
Unigene0000808	2.006	1.285	1.291	1.051	0.182	0.507	IPK1	XP_016435252.1 PREDICTED: inositol-pentakisphosphate 2-kinase-like [Nicotiana tabacum]	Metabolism;Environmental Information Processing;Metabolism	Global and overview maps;Signal transduction;Carbohydrate metabolism	ko01100//Metabolic pathways;ko04070//Phosphatidylinositol signaling system;ko00562//Inositol phosphate metabolism	K10572;K10572;K10572	GO:0000428//DNA-directed RNA polymerase complex;GO:0005575//cellular_component;GO:0005622//intracellular anatomical structure;GO:0005634//nucleus;GO:0005654//nucleoplasm;GO:0005730//nucleolus;GO:0005736//RNA polymerase I complex;GO:0005737//cytoplasm;GO:0005813//centrosome;GO:0005815//microtubule organizing center;GO:0005829//cytosol;GO:0005856//cytoskeleton;GO:0005929//cilium;GO:0015630//microtu…	GO:0000166//nucleotide binding;GO:0003674//molecular_function;GO:0003824//catalytic activity;GO:0005198//structural molecule activity;GO:0005488//binding;GO:0005515//protein binding;GO:0005524//ATP binding;GO:0016301//kinase activity;GO:0016740//transferase activity;GO:0016772//transferase activity, transferring phosphorus-containing groups;GO:0016773//phosphotransferase activity, alcohol group a…	GO:0002252//immune effector process;GO:0002376//immune system process;GO:0003341//cilium movement;GO:0003351//epithelial cilium movement involved in extracellular fluid movement;GO:0005975//carbohydrate metabolic process;GO:0006020//inositol metabolic process;GO:0006066//alcohol metabolic process;GO:0006355//regulation of transcription, DNA-templated;GO:0006356//regulation of transcription by RNA…	--
Unigene0000809	21.731	19.428	17.441	10.915	9.851	8.47	IPK1	XP_016568527.1 PREDICTED: inositol-pentakisphosphate 2-kinase-like [Capsicum annuum]	Metabolism;Environmental Information Processing;Metabolism	Global and overview maps;Signal transduction;Carbohydrate metabolism	ko01100//Metabolic pathways;ko04070//Phosphatidylinositol signaling system;ko00562//Inositol phosphate metabolism	K10572;K10572;K10572	-	GO:0000981//DNA-binding transcription factor activity, RNA polymerase II-specific;GO:0005524//ATP binding;GO:0008270//zinc ion binding;GO:0035299//inositol pentakisphosphate 2-kinase activity	GO:0006355//regulation of transcription, DNA-templated	--
Unigene0000810	1.062	0.613	0.373	0.378	0.511	0.285	--	-	-	-	-	-	-	-	-	--
Unigene0000812	5.125	5.354	4.978	1.927	1.888	1.451	At5g55720	XP_006361391.1 PREDICTED: probable pectate lyase 4 [Solanum tuberosum]	Metabolism;Metabolism	Global and overview maps;Carbohydrate metabolism	ko01100//Metabolic pathways;ko00040//Pentose and glucuronate interconversions	K01728;K01728	-	-	-	--
Unigene0000813	47.529	46.726	59.515	15.744	12.898	14.534	PMR6	XP_015086095.1 probable pectate lyase 4 [Solanum pennellii]	Metabolism;Metabolism	Global and overview maps;Carbohydrate metabolism	ko01100//Metabolic pathways;ko00040//Pentose and glucuronate interconversions	K01728;K01728	-	-	-	--
Unigene0000814	4.552	4.971	3.937	23.13	28.865	26.677	RNP1	XP_016554485.1 PREDICTED: heterogeneous nuclear ribonucleoprotein 1-like [Capsicum annuum]	Genetic Information Processing	Translation	ko03015//mRNA surveillance pathway	K14411	GO:0005575//cellular_component;GO:0005622//intracellular anatomical structure;GO:0005737//cytoplasm	GO:0003674//molecular_function;GO:0003676//nucleic acid binding;GO:0003723//RNA binding;GO:0005488//binding;GO:0097159//organic cyclic compound binding;GO:1901363//heterocyclic compound binding	GO:0000003//reproduction;GO:0003006//developmental process involved in reproduction;GO:0007275//multicellular organism development;GO:0007276//gamete generation;GO:0007281//germ cell development;GO:0007292//female gamete generation;GO:0008150//biological_process;GO:0008380//RNA splicing;GO:0009987//cellular process;GO:0019953//sexual reproduction;GO:0022412//cellular process involved in reproduct…	--
Unigene0000815	0.313	1.548	0.395	0.334	0	0	--	-	-	-	-	-	-	-	-	--
Unigene0000816	27.159	31.335	32.764	77.761	78.752	80.957	LSM3A	XP_004249874.1 sm-like protein LSM3A [Solanum lycopersicum]	Genetic Information Processing;Genetic Information Processing	Transcription;Folding, sorting and degradation	ko03040//Spliceosome;ko03018//RNA degradation	K12622;K12622	GO:0000781//chromosome, telomeric region;GO:0000932//P-body;GO:0005575//cellular_component;GO:0005622//intracellular anatomical structure;GO:0005634//nucleus;GO:0005654//nucleoplasm;GO:0005681//spliceosomal complex;GO:0005688//U6 snRNP;GO:0005694//chromosome;GO:0005697//telomerase holoenzyme complex;GO:0005730//nucleolus;GO:0005732//sno(s)RNA-containing ribonucleoprotein complex;GO:0005737//cytop…	GO:0003674//molecular_function;GO:0003676//nucleic acid binding;GO:0003682//chromatin binding;GO:0003723//RNA binding;GO:0005488//binding;GO:0017069//snRNA binding;GO:0017070//U6 snRNA binding;GO:0030629//U6 snRNA 3'-end binding;GO:0070034//telomerase RNA binding;GO:0097159//organic cyclic compound binding;GO:1901363//heterocyclic compound binding	GO:0000288//nuclear-transcribed mRNA catabolic process, deadenylation-dependent decay;GO:0000291//nuclear-transcribed mRNA catabolic process, exonucleolytic;GO:0000375//RNA splicing, via transesterification reactions;GO:0000377//RNA splicing, via transesterification reactions with bulged adenosine as nucleophile;GO:0000398//mRNA splicing, via spliceosome;GO:0000956//nuclear-transcribed mRNA catab…	--
Unigene0000817	0.266	0.316	0.492	8.351	24.232	12.552	RE1	XP_019223790.1 PREDICTED: uncharacterized protein LOC109205534 [Nicotiana attenuata]	-	-	-	-	-	GO:0003676//nucleic acid binding;GO:0008270//zinc ion binding	-	--
Unigene0000818	0.333	0	0.42	0.178	1.538	0	--	-	-	-	-	-	-	-	-	--
Unigene0000819	0	1.131	0.641	0	0	0	--	-	-	-	-	-	-	-	-	--
Unigene0000820	11.762	10.926	14.793	4.729	6.14	5.207	NAC078	XP_009625486.1 NAC domain-containing protein 78-like [Nicotiana tomentosiformis]	-	-	-	-	-	GO:0003677//DNA binding	GO:0006355//regulation of transcription, DNA-templated	NAC
Unigene0000821	0.18	0.178	0.379	31.696	14.896	17.028	JUB1	XP_009591286.1 transcription factor JUNGBRUNNEN 1-like [Nicotiana tomentosiformis]	-	-	-	-	-	GO:0003677//DNA binding	GO:0006355//regulation of transcription, DNA-templated	NAC
Unigene0000822	0.056	0.444	0.519	2.697	2.916	1.685	NAC050	PHT64308.1 NAC domain-containing protein 16 [Capsicum annuum]	-	-	-	-	-	GO:0003677//DNA binding	GO:0006355//regulation of transcription, DNA-templated	NAC
Unigene0000823	11.769	11.898	15.266	39.764	48.099	42.762	NAC053	KAH0670391.1 hypothetical protein KY289_024884 [Solanum tuberosum]	-	-	-	-	-	GO:0003677//DNA binding;GO:0046422//violaxanthin de-epoxidase activity	GO:0006355//regulation of transcription, DNA-templated	--
Unigene0000824	12.622	10.701	16.875	50.704	76.417	70.492	NAC053	XP_009771991.1 PREDICTED: NAC domain-containing protein 78-like isoform X1 [Nicotiana sylvestris]	-	-	-	-	-	GO:0003677//DNA binding	GO:0006355//regulation of transcription, DNA-templated	NAC
Unigene0000825	1.756	1.678	2.191	0.259	0.28	0.195	--	-	-	-	-	-	-	-	-	--
Unigene0000826	0.252	1.249	0.743	0.674	0.583	1.218	--	-	-	-	-	-	-	-	-	--
Unigene0000827	1.025	0.381	1.618	0.274	0.444	0.275	--	-	-	-	-	-	-	-	-	--
Unigene0000828	2.228	2.206	3.826	0.191	1.133	0.734	--	-	-	-	-	-	-	-	-	--
Unigene0000830	0	0.061	0.052	2.851	4.947	5.261	--	-	-	-	-	-	-	-	-	--
Unigene0000831	3.272	4.165	2.715	139.232	181.061	186.839	NRT2.7	XP_016508369.1 PREDICTED: high affinity nitrate transporter 2.7 [Nicotiana tabacum]	Metabolism	Energy metabolism	ko00910//Nitrogen metabolism	K02575	GO:0000325//plant-type vacuole;GO:0005575//cellular_component;GO:0005622//intracellular anatomical structure;GO:0005737//cytoplasm;GO:0005773//vacuole;GO:0005774//vacuolar membrane;GO:0005886//plasma membrane;GO:0005887//integral component of plasma membrane;GO:0009705//plant-type vacuole membrane;GO:0016020//membrane;GO:0016021//integral component of membrane;GO:0031090//organelle membrane;GO:00…	GO:0003674//molecular_function;GO:0005215//transporter activity;GO:0008509//anion transmembrane transporter activity;GO:0015075//ion transmembrane transporter activity;GO:0015103//inorganic anion transmembrane transporter activity;GO:0015112//nitrate transmembrane transporter activity;GO:0015318//inorganic molecular entity transmembrane transporter activity;GO:0015514//nitrite efflux transmembran…	GO:0001101//response to acid chemical;GO:0006082//organic acid metabolic process;GO:0006807//nitrogen compound metabolic process;GO:0006810//transport;GO:0006811//ion transport;GO:0006820//anion transport;GO:0008150//biological_process;GO:0008152//metabolic process;GO:0009987//cellular process;GO:0010035//response to inorganic substance;GO:0010167//response to nitrate;GO:0015698//inorganic anion …	--
Unigene0000832	0.886	0.175	0.298	0.852	0.102	0.38	--	-	-	-	-	-	-	-	-	--
Unigene0000835	1.102	0.818	0.58	0.442	0	0	--	-	-	-	-	-	-	-	-	--
Unigene0000837	80.917	75.852	85.196	22.932	20.348	15.896	--	XP_004238928.1 uncharacterized protein LOC101254384 [Solanum lycopersicum]	-	-	-	-	-	-	-	--
Unigene0000838	1.37	0.863	1.362	0	0.576	0.134	--	-	-	-	-	-	-	-	-	--
Unigene0000839	1.086	1.613	0.762	0	0	0.583	--	-	-	-	-	-	-	-	-	--
Unigene0000840	0	0	0.685	0	0	0	--	-	-	-	-	-	-	-	-	--
Unigene0000841	0	0	0	0.367	0	0.184	--	KAH0696021.1 hypothetical protein KY289_013503 [Solanum tuberosum]	-	-	-	-	-	-	-	--
Unigene0000842	0	0	0	0.404	0	0	--	KAG5586555.1 hypothetical protein H5410_046989 [Solanum commersonii]	-	-	-	-	-	-	-	--
Unigene0000843	0	0	0	1.959	0.77	0	--	KAG5575029.1 hypothetical protein H5410_055163, partial [Solanum commersonii]	-	-	-	-	-	GO:0030515//snoRNA binding	GO:0000462//maturation of SSU-rRNA from tricistronic rRNA transcript (SSU-rRNA, 5.8S rRNA, LSU-rRNA)	--
Unigene0000845	14.622	7.333	12.897	1.494	0.982	1.075	murG	RXH96587.1 hypothetical protein DVH24_009091 [Malus domestica]	Metabolism	Global and overview maps	ko01100//Metabolic pathways	K02563	-	GO:0016758//hexosyltransferase activity;GO:0016788//hydrolase activity, acting on ester bonds;GO:0047570//3-oxoadipate enol-lactonase activity;GO:0050511//undecaprenyldiphospho-muramoylpentapeptide beta-N-acetylglucosaminyltransferase activity	GO:0005975//carbohydrate metabolic process;GO:0009252//peptidoglycan biosynthetic process;GO:0030259//lipid glycosylation;GO:0042952//beta-ketoadipate pathway	--
Unigene0000846	2.192	3.313	2.477	0.678	1.8	0.495	--	KAG5606742.1 hypothetical protein H5410_028234 [Solanum commersonii]	-	-	-	-	GO:0005575//cellular_component;GO:0005622//intracellular anatomical structure;GO:0005737//cytoplasm;GO:0005739//mitochondrion;GO:0009507//chloroplast;GO:0009536//plastid;GO:0043226//organelle;GO:0043227//membrane-bounded organelle;GO:0043229//intracellular organelle;GO:0043231//intracellular membrane-bounded organelle	GO:0003674//molecular_function;GO:0003824//catalytic activity;GO:0004659//prenyltransferase activity;GO:0005488//binding;GO:0016740//transferase activity;GO:0016765//transferase activity, transferring alkyl or aryl (other than methyl) groups;GO:0043167//ion binding;GO:0043169//cation binding;GO:0046872//metal ion binding;GO:0050347//trans-octaprenyltranstransferase activity;GO:0052924//all-trans-…	GO:0000003//reproduction;GO:0003006//developmental process involved in reproduction;GO:0006629//lipid metabolic process;GO:0006720//isoprenoid metabolic process;GO:0006743//ubiquinone metabolic process;GO:0006744//ubiquinone biosynthetic process;GO:0007275//multicellular organism development;GO:0008150//biological_process;GO:0008152//metabolic process;GO:0008299//isoprenoid biosynthetic process;G…	--
Unigene0000847	12.198	13.884	13.731	8.843	10.047	6.422	RGGA	KAH0660201.1 hypothetical protein KY289_028949 [Solanum tuberosum]	-	-	-	-	-	-	-	--
Unigene0000848	5.365	1.897	2.258	1.639	1.919	2.331	--	-	-	-	-	-	-	-	-	--
Unigene0000849	1.874	2.614	1.075	0.637	0.886	0.274	--	XP_019237909.1 PREDICTED: craniofacial development protein 2-like [Nicotiana attenuata]	-	-	-	-	-	GO:0008853//exodeoxyribonuclease III activity	GO:0006281//DNA repair	--
Unigene0000852	0	0.179	0.304	0	1.253	0.776	--	-	-	-	-	-	-	-	-	--
Unigene0000853	0.512	1.353	0.288	0.183	0.197	0.183	RPP13	PHT48524.1 hypothetical protein CQW23_12732 [Capsicum baccatum]	-	-	-	-	-	GO:0043531//ADP binding	-	--
Unigene0000854	0	0	0	1.383	0	0	RPP13	PHT48524.1 hypothetical protein CQW23_12732 [Capsicum baccatum]	-	-	-	-	-	GO:0043531//ADP binding	-	--
Unigene0000855	0	0.988	0.373	9.955	11.405	11.069	HCR9-0	XP_006367796.1 PREDICTED: receptor-like protein 12 isoform X1 [Solanum tuberosum]	-	-	-	-	-	GO:0004197//cysteine-type endopeptidase activity;GO:0005515//protein binding;GO:0008242//omega peptidase activity;GO:0016740//transferase activity	-	--
Unigene0000856	0	0.249	0	0	0	0	--	KAH0730895.1 hypothetical protein KY289_002083 [Solanum tuberosum]	-	-	-	-	GO:0005575//cellular_component;GO:0005622//intracellular anatomical structure;GO:0005737//cytoplasm;GO:0005768//endosome;GO:0005794//Golgi apparatus;GO:0005802//trans-Golgi network;GO:0005886//plasma membrane;GO:0005911//cell-cell junction;GO:0009506//plasmodesma;GO:0012505//endomembrane system;GO:0016020//membrane;GO:0016021//integral component of membrane;GO:0030054//cell junction;GO:0031224//i…	GO:0003674//molecular_function;GO:0003824//catalytic activity;GO:0005488//binding;GO:0008194//UDP-glycosyltransferase activity;GO:0016740//transferase activity;GO:0016757//glycosyltransferase activity;GO:0016758//hexosyltransferase activity;GO:0016759//cellulose synthase activity;GO:0016760//cellulose synthase (UDP-forming) activity;GO:0035251//UDP-glucosyltransferase activity;GO:0043167//ion bin…	GO:0000271//polysaccharide biosynthetic process;GO:0000278//mitotic cell cycle;GO:0000281//mitotic cytokinesis;GO:0000910//cytokinesis;GO:0005975//carbohydrate metabolic process;GO:0005976//polysaccharide metabolic process;GO:0006073//cellular glucan metabolic process;GO:0006950//response to stress;GO:0006952//defense response;GO:0007049//cell cycle;GO:0008150//biological_process;GO:0008152//meta…	--
Unigene0000857	0	0.361	0	0	0	0.196	--	-	-	-	-	-	-	-	-	--
Unigene0000858	0.465	1.227	0.652	0	0	0	--	-	-	-	-	-	-	-	-	--
Unigene0000859	0	1.343	0	0	0	0	--	-	-	-	-	-	-	-	-	--
Unigene0000862	0	0	0	5.408	3.823	4.909	--	XP_009789253.1 PREDICTED: uncharacterized protein LOC104236903 [Nicotiana sylvestris]	-	-	-	-	-	GO:0046872//metal ion binding	-	--
Unigene0000864	0	0.151	0	108.703	189.848	129.106	--	XP_009594893.1 uncharacterized protein LOC104091284 [Nicotiana tomentosiformis]	-	-	-	-	-	-	-	--
Unigene0000865	0	0.148	0.505	1.763	0.866	0.805	--	KAH0635072.1 hypothetical protein KY284_037858 [Solanum tuberosum]	-	-	-	-	-	-	-	--
Unigene0000866	0	0.21	0.715	0.681	0.245	0	--	KAH0635072.1 hypothetical protein KY284_037858 [Solanum tuberosum]	-	-	-	-	-	-	-	--
Unigene0000867	2.501	3.467	3.368	0	0.578	0.268	--	-	-	-	-	-	-	-	-	--
Unigene0000868	0	0.286	0.487	0	0	0	--	XP_016549449.1 PREDICTED: LOW QUALITY PROTEIN: TMV resistance protein N-like [Capsicum annuum]	-	-	-	-	-	-	-	--
Unigene0000869	2.094	1.629	2.191	5.211	4.563	3.821	N	XP_009785918.1 PREDICTED: TMV resistance protein N-like [Nicotiana sylvestris]	-	-	-	-	-	GO:0043531//ADP binding	-	--
Unigene0000870	1.642	1.626	0.922	1.17	1.055	0.588	N	AKN63610.1 disease resistance protein N-like protein, partial [Nicotiana forgetiana]	-	-	-	-	-	GO:0005515//protein binding;GO:0043531//ADP binding	GO:0007165//signal transduction	--
Unigene0000871	0.608	0.301	0	0	0	0	--	-	-	-	-	-	-	-	-	--
Unigene0000873	7.521	7.392	11.079	7.743	10.226	7.895	surE	KAH0660588.1 hypothetical protein KY289_029336 [Solanum tuberosum]	Metabolism;Metabolism;Metabolism;Metabolism;Metabolism	Global and overview maps;Global and overview maps;Nucleotide metabolism;Nucleotide metabolism;Metabolism of cofactors and vitamins	ko01100//Metabolic pathways;ko01110//Biosynthesis of secondary metabolites;ko00230//Purine metabolism;ko00240//Pyrimidine metabolism;ko00760//Nicotinate and nicotinamide metabolism	K03787;K03787;K03787;K03787;K03787	-	GO:0008253//5'-nucleotidase activity;GO:0008254//3'-nucleotidase activity;GO:0016787//hydrolase activity	GO:0006950//response to stress	--
Unigene0000874	0.253	0	0.213	0	0	0	--	-	-	-	-	-	-	-	-	--
Unigene0000875	1.235	0.795	0.728	0.33	0.428	1.26	--	KAH0757116.1 hypothetical protein KY290_020609 [Solanum tuberosum]	-	-	-	-	-	-	-	--
Unigene0000877	1.201	0.476	1.011	0.257	0.555	0.258	--	-	-	-	-	-	-	-	-	--
Unigene0000878	15.863	17.327	13.767	11.071	12.159	12.874	OTU4	XP_016541694.1 PREDICTED: OTU domain-containing protein At3g57810-like [Capsicum annuum]	-	-	-	-	GO:0005575//cellular_component;GO:0005622//intracellular anatomical structure;GO:0005737//cytoplasm;GO:0009507//chloroplast;GO:0009536//plastid;GO:0043226//organelle;GO:0043227//membrane-bounded organelle;GO:0043229//intracellular organelle;GO:0043231//intracellular membrane-bounded organelle	-	-	--
Unigene0000879	0.675	0.167	0.639	0.451	0.39	0.905	--	-	-	-	-	-	-	GO:0016872//intramolecular lyase activity	-	--
Unigene0000880	0	0	0.21	0	0.866	0	--	-	-	-	-	-	-	-	-	--
Unigene0000881	0.745	0	0.209	0	0	0	--	XP_016541694.1 PREDICTED: OTU domain-containing protein At3g57810-like [Capsicum annuum]	-	-	-	-	GO:0005575//cellular_component;GO:0005622//intracellular anatomical structure;GO:0005737//cytoplasm;GO:0009507//chloroplast;GO:0009536//plastid;GO:0043226//organelle;GO:0043227//membrane-bounded organelle;GO:0043229//intracellular organelle;GO:0043231//intracellular membrane-bounded organelle	-	-	--
Unigene0000882	0	0.308	0	0	0	0	--	-	-	-	-	-	-	-	-	--
Unigene0000884	3.553	2.29	4.083	4.039	4.628	3.693	SGO2	XP_006361700.1 PREDICTED: shugoshin-1 isoform X1 [Solanum tuberosum]	-	-	-	-	GO:0000775//chromosome, centromeric region;GO:0005634//nucleus	-	GO:0045132//meiotic chromosome segregation	--
Unigene0000885	4.815	5.254	6.866	24.999	32.936	34.917	--	KAH0700240.1 hypothetical protein KY284_014455 [Solanum tuberosum]	-	-	-	-	-	-	-	--
Unigene0000886	0.261	1.034	0.44	29.034	31.241	23.27	--	KAF3645364.1 hypothetical protein FXO37_21023 [Capsicum annuum]	-	-	-	-	-	-	-	--
Unigene0000887	0.101	0	0	2.272	5.614	2.933	--	KAF3645365.1 hypothetical protein FXO37_21024 [Capsicum annuum]	-	-	-	-	GO:0033104//type VI protein secretion system complex	GO:0003674//molecular_function	GO:0033103//protein secretion by the type VI secretion system	--
Unigene0000888	1.196	0.646	0.366	0	0	0	ORRM6	XP_016448395.1 PREDICTED: transformer-2 protein homolog alpha-like isoform X2 [Nicotiana tabacum]	-	-	-	-	GO:0005575//cellular_component;GO:0005622//intracellular anatomical structure;GO:0005634//nucleus;GO:0005737//cytoplasm;GO:0009507//chloroplast;GO:0009536//plastid;GO:0043226//organelle;GO:0043227//membrane-bounded organelle;GO:0043229//intracellular organelle;GO:0043231//intracellular membrane-bounded organelle	GO:0003674//molecular_function;GO:0003676//nucleic acid binding;GO:0003723//RNA binding;GO:0005488//binding;GO:0097159//organic cyclic compound binding;GO:1901363//heterocyclic compound binding	GO:0006139//nucleobase-containing compound metabolic process;GO:0006396//RNA processing;GO:0006397//mRNA processing;GO:0006725//cellular aromatic compound metabolic process;GO:0006807//nitrogen compound metabolic process;GO:0008150//biological_process;GO:0008152//metabolic process;GO:0008380//RNA splicing;GO:0009451//RNA modification;GO:0009987//cellular process;GO:0010467//gene expression;GO:001…	--
Unigene0000889	0.418	0	0	0	0	0	--	XP_006355796.1 PREDICTED: uncharacterized protein LOC102581664 isoform X2 [Solanum tuberosum]	-	-	-	-	-	-	-	--
Unigene0000890	0.728	1.443	1.314	0.779	0.241	0.67	--	XP_016576138.1 PREDICTED: uncharacterized protein LOC107873715 isoform X2 [Capsicum annuum]	-	-	-	-	-	-	-	--
Unigene0000891	0.221	0.175	0.149	9.997	11.064	10.466	DREB2C	PHT72403.1 hypothetical protein T459_23188 [Capsicum annuum]	-	-	-	-	-	GO:0003700//DNA-binding transcription factor activity	GO:0006355//regulation of transcription, DNA-templated	ERF
Unigene0000892	3.468	2.842	3.423	2.173	1.244	2.054	--	KAH0746852.1 hypothetical protein KY285_008509 [Solanum tuberosum]	-	-	-	-	-	-	-	--
Unigene0000893	0.571	0	0.641	0	0.44	0	--	-	-	-	-	-	-	-	-	--
Unigene0000894	0.392	0	0	0	0	0.21	--	-	-	-	-	-	-	-	-	--
Unigene0000895	3.792	8.513	4.404	1.712	1.148	1.524	SULTR3;1	PHT46949.1 Sulfate transporter 3.1 [Capsicum baccatum]	-	-	-	-	GO:0016020//membrane;GO:0016021//integral component of membrane	GO:0015116//sulfate transmembrane transporter activity	GO:0008272//sulfate transport	--
Unigene0000896	10.982	8.132	7.077	12.414	14.602	11.997	ALP1	XP_006352763.1 PREDICTED: putative nuclease HARBI1 [Solanum tuberosum]	-	-	-	-	GO:0000151//ubiquitin ligase complex;GO:0000152//nuclear ubiquitin ligase complex;GO:0005575//cellular_component;GO:0005622//intracellular anatomical structure;GO:0005634//nucleus;GO:0005654//nucleoplasm;GO:0016020//membrane;GO:0016021//integral component of membrane;GO:0031519//PcG protein complex;GO:0031974//membrane-enclosed lumen;GO:0031981//nuclear lumen;GO:0032991//protein-containing comple…	GO:0003674//molecular_function;GO:0003682//chromatin binding;GO:0003824//catalytic activity;GO:0004518//nuclease activity;GO:0005488//binding;GO:0015116//sulfate transmembrane transporter activity;GO:0016787//hydrolase activity;GO:0016788//hydrolase activity, acting on ester bonds;GO:0043167//ion binding;GO:0043169//cation binding;GO:0046872//metal ion binding	GO:0006139//nucleobase-containing compound metabolic process;GO:0006351//transcription, DNA-templated;GO:0006355//regulation of transcription, DNA-templated;GO:0006725//cellular aromatic compound metabolic process;GO:0006807//nitrogen compound metabolic process;GO:0008150//biological_process;GO:0008152//metabolic process;GO:0008272//sulfate transport;GO:0009058//biosynthetic process;GO:0009059//m…	--
Unigene0000898	155.299	174.914	158.88	35.588	24.1	30.656	PRPS9	XP_004238213.1 30S ribosomal protein S9, chloroplastic [Solanum lycopersicum]	Genetic Information Processing	Translation	ko03010//Ribosome	K02996	GO:0000312//plastid small ribosomal subunit;GO:0000313//organellar ribosome;GO:0000314//organellar small ribosomal subunit;GO:0005575//cellular_component;GO:0005622//intracellular anatomical structure;GO:0005737//cytoplasm;GO:0005840//ribosome;GO:0009507//chloroplast;GO:0009526//plastid envelope;GO:0009532//plastid stroma;GO:0009536//plastid;GO:0009547//plastid ribosome;GO:0009570//chloroplast st…	GO:0003674//molecular_function;GO:0003676//nucleic acid binding;GO:0003723//RNA binding;GO:0003735//structural constituent of ribosome;GO:0005198//structural molecule activity;GO:0005488//binding;GO:0019843//rRNA binding;GO:0097159//organic cyclic compound binding;GO:1901363//heterocyclic compound binding	GO:0000462//maturation of SSU-rRNA from tricistronic rRNA transcript (SSU-rRNA, 5.8S rRNA, LSU-rRNA);GO:0006139//nucleobase-containing compound metabolic process;GO:0006364//rRNA processing;GO:0006396//RNA processing;GO:0006412//translation;GO:0006518//peptide metabolic process;GO:0006725//cellular aromatic compound metabolic process;GO:0006807//nitrogen compound metabolic process;GO:0008150//bio…	--
Unigene0000899	0.305	0.604	1.284	0.652	1.586	2.947	CURT1A	XP_015067526.1 protein CURVATURE THYLAKOID 1A, chloroplastic-like isoform X1 [Solanum pennellii]	-	-	-	-	-	-	-	--
Unigene0000902	23.956	21.086	17.064	20.026	15.618	25.717	dnaJ1	XP_019238445.1 PREDICTED: uncharacterized protein LOC109218531 [Nicotiana attenuata]	-	-	-	-	GO:0005575//cellular_component;GO:0005622//intracellular anatomical structure;GO:0005737//cytoplasm	GO:0000166//nucleotide binding;GO:0003674//molecular_function;GO:0005488//binding;GO:0005515//protein binding;GO:0005524//ATP binding;GO:0017076//purine nucleotide binding;GO:0030554//adenyl nucleotide binding;GO:0031072//heat shock protein binding;GO:0032553//ribonucleotide binding;GO:0032555//purine ribonucleotide binding;GO:0032559//adenyl ribonucleotide binding;GO:0035639//purine ribonucleosi…	GO:0006139//nucleobase-containing compound metabolic process;GO:0006259//DNA metabolic process;GO:0006260//DNA replication;GO:0006457//protein folding;GO:0006725//cellular aromatic compound metabolic process;GO:0006807//nitrogen compound metabolic process;GO:0006950//response to stress;GO:0008150//biological_process;GO:0008152//metabolic process;GO:0009058//biosynthetic process;GO:0009059//macrom…	--
Unigene0000903	0.33	0	0	0	0	0	--	-	-	-	-	-	-	-	-	--
Unigene0000905	0.902	0.558	0.854	0.361	0	0.242	--	-	-	-	-	-	-	-	-	--
Unigene0000906	5.314	6.438	6.841	24.992	21.892	21.81	HCC1	XP_006366947.1 PREDICTED: protein SCO1 homolog 1, mitochondrial [Solanum tuberosum]	-	-	-	-	GO:0005575//cellular_component;GO:0005622//intracellular anatomical structure;GO:0005737//cytoplasm;GO:0005739//mitochondrion;GO:0005740//mitochondrial envelope;GO:0005743//mitochondrial inner membrane;GO:0016020//membrane;GO:0016021//integral component of membrane;GO:0019866//organelle inner membrane;GO:0031090//organelle membrane;GO:0031224//intrinsic component of membrane;GO:0031966//mitochond…	GO:0003674//molecular_function;GO:0005488//binding;GO:0005507//copper ion binding;GO:0016209//antioxidant activity;GO:0016491//oxidoreductase activity;GO:0043167//ion binding;GO:0043169//cation binding;GO:0046872//metal ion binding;GO:0046914//transition metal ion binding;GO:0051920//peroxiredoxin activity	GO:0000003//reproduction;GO:0000041//transition metal ion transport;GO:0003006//developmental process involved in reproduction;GO:0006810//transport;GO:0006811//ion transport;GO:0006812//cation transport;GO:0006825//copper ion transport;GO:0006873//cellular ion homeostasis;GO:0006875//cellular metal ion homeostasis;GO:0006878//cellular copper ion homeostasis;GO:0006979//response to oxidative stre…	--
Unigene0000908	3.91	3.208	6.113	10.15	6.327	5.277	ATG8C	QAR18124.1 ATG8c2 [Nicotiana benthamiana]	Cellular Processes	Transport and catabolism	ko04136//Autophagy - other	K08341	GO:0005737//cytoplasm	-	GO:0000045//autophagosome assembly	--
Unigene0000909	0	0	0	0	1.656	0	--	-	-	-	-	-	-	-	-	--
Unigene0000910	4.015	5.072	5.11	1.791	1.644	1.935	NEDD1	KAH0763636.1 hypothetical protein KY290_019709 [Solanum tuberosum]	-	-	-	-	GO:0000242//pericentriolar material;GO:0000775//chromosome, centromeric region;GO:0000776//kinetochore;GO:0000779//condensed chromosome, centromeric region;GO:0000793//condensed chromosome;GO:0000922//spindle pole;GO:0005575//cellular_component;GO:0005622//intracellular anatomical structure;GO:0005634//nucleus;GO:0005635//nuclear envelope;GO:0005694//chromosome;GO:0005737//cytoplasm;GO:0005813//c…	GO:0005515//protein binding	GO:0000278//mitotic cell cycle;GO:0000281//mitotic cytokinesis;GO:0000910//cytokinesis;GO:0000911//cytokinesis by cell plate formation;GO:0000919//cell plate assembly;GO:0006357//regulation of transcription by RNA polymerase II;GO:0007049//cell cycle;GO:0007275//multicellular organism development;GO:0007346//regulation of mitotic cell cycle;GO:0008104//protein localization;GO:0008150//biological_…	--
Unigene0000911	15.602	16.338	19.247	6.556	6.851	5.427	NEDD1	KAH0691513.1 hypothetical protein KY289_018871 [Solanum tuberosum]	-	-	-	-	GO:0000242//pericentriolar material;GO:0000775//chromosome, centromeric region;GO:0000776//kinetochore;GO:0000779//condensed chromosome, centromeric region;GO:0000793//condensed chromosome;GO:0000922//spindle pole;GO:0005575//cellular_component;GO:0005622//intracellular anatomical structure;GO:0005634//nucleus;GO:0005635//nuclear envelope;GO:0005694//chromosome;GO:0005737//cytoplasm;GO:0005813//c…	GO:0005515//protein binding	GO:0000278//mitotic cell cycle;GO:0000281//mitotic cytokinesis;GO:0000910//cytokinesis;GO:0000911//cytokinesis by cell plate formation;GO:0000919//cell plate assembly;GO:0007049//cell cycle;GO:0007275//multicellular organism development;GO:0007346//regulation of mitotic cell cycle;GO:0008104//protein localization;GO:0008150//biological_process;GO:0009553//embryo sac development;GO:0009555//pollen…	SAP
Unigene0000912	0.507	0.251	0.426	0	0	0	--	PHU30671.1 Isoleucine--tRNA ligase [Capsicum chinense]	-	-	-	-	-	GO:0003824//catalytic activity;GO:0008199//ferric iron binding	GO:0006725//cellular aromatic compound metabolic process	--
Unigene0000913	8.413	8.17	10.51	12.509	11.375	11.984	HUB1	KAF3650251.1 E3 ubiquitin-protein ligase BRE1-like 1 [Capsicum annuum]	-	-	-	-	GO:0000109//nucleotide-excision repair complex;GO:0005575//cellular_component;GO:0005622//intracellular anatomical structure;GO:0005634//nucleus;GO:0005680//anaphase-promoting complex;GO:0005737//cytoplasm;GO:0005739//mitochondrion;GO:0043226//organelle;GO:0043227//membrane-bounded organelle;GO:0043229//intracellular organelle;GO:0043231//intracellular membrane-bounded organelle	GO:0003674//molecular_function;GO:0003824//catalytic activity;GO:0004842//ubiquitin-protein transferase activity;GO:0005488//binding;GO:0005515//protein binding;GO:0005524//ATP binding;GO:0008270//zinc ion binding;GO:0016740//transferase activity;GO:0019787//ubiquitin-like protein transferase activity;GO:0042802//identical protein binding;GO:0042803//protein homodimerization activity;GO:0043167//…	GO:0000003//reproduction;GO:0002376//immune system process;GO:0003006//developmental process involved in reproduction;GO:0006289//nucleotide-excision repair;GO:0006325//chromatin organization;GO:0006464//cellular protein modification process;GO:0006513//protein monoubiquitination;GO:0006606//protein import into nucleus;GO:0006807//nitrogen compound metabolic process;GO:0006950//response to stress…	--
Unigene0000914	3.436	3.996	3.7	3.929	3.233	3.818	DYW10	KAF3649343.1 Pentatricopeptide repeat-containing protein, mitochondrial [Capsicum annuum]	-	-	-	-	GO:0005575//cellular_component;GO:0005622//intracellular anatomical structure;GO:0005737//cytoplasm;GO:0005739//mitochondrion;GO:0043226//organelle;GO:0043227//membrane-bounded organelle;GO:0043229//intracellular organelle;GO:0043231//intracellular membrane-bounded organelle	GO:0003674//molecular_function;GO:0003676//nucleic acid binding;GO:0003723//RNA binding;GO:0003824//catalytic activity;GO:0004518//nuclease activity;GO:0004519//endonuclease activity;GO:0005488//binding;GO:0008270//zinc ion binding;GO:0016787//hydrolase activity;GO:0016788//hydrolase activity, acting on ester bonds;GO:0043167//ion binding;GO:0043169//cation binding;GO:0046872//metal ion binding;G…	GO:0000959//mitochondrial RNA metabolic process;GO:0006139//nucleobase-containing compound metabolic process;GO:0006725//cellular aromatic compound metabolic process;GO:0006807//nitrogen compound metabolic process;GO:0008150//biological_process;GO:0008152//metabolic process;GO:0009451//RNA modification;GO:0009987//cellular process;GO:0016070//RNA metabolic process;GO:0034641//cellular nitrogen co…	--
Unigene0000915	1.613	1.829	2.124	1.557	2.465	1.089	--	XP_016459706.1 PREDICTED: uncharacterized protein LOC107783250 isoform X2 [Nicotiana tabacum]	-	-	-	-	-	-	-	--
Unigene0000916	171.337	150.322	211.819	110.571	87.593	104.27	SBT1.4	XP_019261772.1 PREDICTED: subtilisin-like protease SBT1.4 [Nicotiana attenuata]	-	-	-	-	-	GO:0008236//serine-type peptidase activity	GO:0006508//proteolysis;GO:0009306//protein secretion	--
Unigene0000917	20.622	23.408	22.97	29.704	31.826	33.476	--	XP_009588975.1 uncharacterized protein LOC104086432 [Nicotiana tomentosiformis]	-	-	-	-	-	-	-	--
Unigene0000918	0.235	1.978	0	0	0	0.505	--	KAH0634074.1 hypothetical protein KY284_036860 [Solanum tuberosum]	-	-	-	-	-	-	-	--
Unigene0000919	0.409	1.011	0.688	0.546	0.826	0.329	--	-	-	-	-	-	-	-	-	--
Unigene0000920	3.367	4.356	3.772	3.861	4.739	4.664	--	-	-	-	-	-	-	GO:0003899//DNA-directed 5'-3' RNA polymerase activity	-	--
Unigene0000921	3.548	1.336	1.262	0.641	3.812	2.307	--	-	-	-	-	-	-	-	-	--
Unigene0000922	0	0	0	8.486	0	0	--	-	-	-	-	-	-	-	-	--
Unigene0000923	0.211	0	0.356	0	0.733	0.227	--	-	-	-	-	-	-	-	-	--
Unigene0000925	0	0	0	0	0.465	0.432	--	-	-	-	-	-	-	-	-	--
Unigene0000926	0.698	0.23	0.587	0.497	0	0.25	--	-	-	-	-	-	-	-	GO:0016260//selenocysteine biosynthetic process	--
Unigene0000927	0.757	0	0	0	0	0	--	-	-	-	-	-	-	-	-	--
Unigene0000928	0.7	0	1.374	0.249	0	0	CEP2	KAH0717838.1 hypothetical protein KY285_013869 [Solanum tuberosum]	-	-	-	-	-	GO:0008234//cysteine-type peptidase activity	GO:0006508//proteolysis	--
Unigene0000932	0.855	0.725	0.411	2.479	2.258	1.048	--	-	-	-	-	-	-	-	-	--
Unigene0000933	0.327	0	0.275	0.175	0.378	0.527	--	-	-	-	-	-	-	-	-	--
Unigene0000935	3.055	4.591	3.811	4.664	4.539	4.743	NFYB8	XP_004246698.1 nuclear transcription factor Y subunit B-10 isoform X1 [Solanum lycopersicum]	-	-	-	-	GO:0005575//cellular_component;GO:0005622//intracellular anatomical structure;GO:0005634//nucleus;GO:0043226//organelle;GO:0043227//membrane-bounded organelle;GO:0043229//intracellular organelle;GO:0043231//intracellular membrane-bounded organelle	GO:0003674//molecular_function;GO:0003676//nucleic acid binding;GO:0003677//DNA binding;GO:0003700//DNA-binding transcription factor activity;GO:0005488//binding;GO:0005515//protein binding;GO:0043565//sequence-specific DNA binding;GO:0046982//protein heterodimerization activity;GO:0046983//protein dimerization activity;GO:0097159//organic cyclic compound binding;GO:0140110//transcription regulat…	GO:0006139//nucleobase-containing compound metabolic process;GO:0006351//transcription, DNA-templated;GO:0006355//regulation of transcription, DNA-templated;GO:0006725//cellular aromatic compound metabolic process;GO:0006807//nitrogen compound metabolic process;GO:0008150//biological_process;GO:0008152//metabolic process;GO:0009058//biosynthetic process;GO:0009059//macromolecule biosynthetic proc…	NF-YB
Unigene0000936	0	0	0.097	3.067	1.857	2.711	--	XP_016485047.1 PREDICTED: uncharacterized protein LOC107805504 [Nicotiana tabacum]	-	-	-	-	-	-	-	--
Unigene0000937	0	0	0	0.516	0	0.778	--	-	-	-	-	-	-	GO:0010011//auxin binding	-	--
Unigene0000940	19.831	18.998	22.562	14.347	17.676	20.037	CYCT1-1	XP_016565839.1 PREDICTED: cyclin-T1-3-like [Capsicum annuum]	-	-	-	-	GO:0000307//cyclin-dependent protein kinase holoenzyme complex;GO:0005575//cellular_component;GO:0005622//intracellular anatomical structure;GO:0005634//nucleus;GO:0032991//protein-containing complex;GO:0043226//organelle;GO:0043227//membrane-bounded organelle;GO:0043229//intracellular organelle;GO:0043231//intracellular membrane-bounded organelle;GO:0061695//transferase complex, transferring pho…	GO:0003674//molecular_function;GO:0016538//cyclin-dependent protein serine/threonine kinase regulator activity;GO:0019207//kinase regulator activity;GO:0019887//protein kinase regulator activity;GO:0030234//enzyme regulator activity;GO:0098772//molecular function regulator	GO:0000079//regulation of cyclin-dependent protein serine/threonine kinase activity;GO:0001932//regulation of protein phosphorylation;GO:0001934//positive regulation of protein phosphorylation;GO:0006355//regulation of transcription, DNA-templated;GO:0006357//regulation of transcription by RNA polymerase II;GO:0007049//cell cycle;GO:0008150//biological_process;GO:0009889//regulation of biosynthet…	--
Unigene0000941	0.227	0.899	0.095	0.606	0	0.487	XXT5	XP_016478584.1 PREDICTED: probable xyloglucan 6-xylosyltransferase 3 [Nicotiana tabacum]	-	-	-	-	GO:0016021//integral component of membrane	GO:0016757//glycosyltransferase activity	-	--
Unigene0000942	0	0.216	0.367	0	0.252	0	rbcL	P36477.1 RecName: Full=Ribulose bisphosphate carboxylase large chain; Short=RuBisCO large subunit [Botrypus strictus]	Metabolism;Metabolism;Metabolism;Metabolism;Metabolism	Global and overview maps;Global and overview maps;Global and overview maps;Carbohydrate metabolism;Energy metabolism	ko01100//Metabolic pathways;ko01110//Biosynthesis of secondary metabolites;ko01200//Carbon metabolism;ko00630//Glyoxylate and dicarboxylate metabolism;ko00710//Carbon fixation in photosynthetic organisms	K01601;K01601;K01601;K01601;K01601	GO:0005575//cellular_component;GO:0005622//intracellular anatomical structure;GO:0005737//cytoplasm;GO:0009507//chloroplast;GO:0009536//plastid;GO:0043226//organelle;GO:0043227//membrane-bounded organelle;GO:0043229//intracellular organelle;GO:0043231//intracellular membrane-bounded organelle	GO:0000287//magnesium ion binding;GO:0003674//molecular_function;GO:0003824//catalytic activity;GO:0004497//monooxygenase activity;GO:0005488//binding;GO:0016491//oxidoreductase activity;GO:0016829//lyase activity;GO:0016830//carbon-carbon lyase activity;GO:0016831//carboxy-lyase activity;GO:0016862//intramolecular oxidoreductase activity, interconverting keto- and enol-groups;GO:0016984//ribulos…	GO:0005975//carbohydrate metabolic process;GO:0008150//biological_process;GO:0008152//metabolic process;GO:0009058//biosynthetic process;GO:0009853//photorespiration;GO:0009987//cellular process;GO:0015977//carbon fixation;GO:0015979//photosynthesis;GO:0016051//carbohydrate biosynthetic process;GO:0019253//reductive pentose-phosphate cycle;GO:0019509//L-methionine salvage from methylthioadenosine…	--
Unigene0000943	0	0	0.542	0	0	0	--	-	-	-	-	-	-	-	-	--
Unigene0000945	0	1.006	0	0	0	0.273	--	-	-	-	-	-	-	-	-	--
Unigene0000948	0	0	0	0.341	0	1.029	--	-	-	-	-	-	-	-	-	--
Unigene0000949	0	1.467	0	0	0	0	--	-	-	-	-	-	-	-	-	--
Unigene0000950	0	0	0.794	0	0.272	0.253	--	PHU13553.1 hypothetical protein BC332_14758 [Capsicum chinense]	-	-	-	-	-	GO:0047922//gentisate 1,2-dioxygenase activity	-	--
Unigene0000951	0.529	0	1.224	0.283	0	0.284	--	XP_016435255.1 PREDICTED: putative pentatricopeptide repeat-containing protein At1g12700, mitochondrial [Nicotiana tabacum]	-	-	-	-	-	-	-	--
Unigene0000952	1.235	0.764	1.3	0	0.178	0.331	--	XP_016466737.1 PREDICTED: putative pentatricopeptide repeat-containing protein At1g12700, mitochondrial [Nicotiana tabacum]	-	-	-	-	-	GO:0003677//DNA binding;GO:0003899//DNA-directed 5'-3' RNA polymerase activity	GO:0006351//transcription, DNA-templated	--
Unigene0000953	0	0	0	0.354	0	0	--	KAF3620567.1 putative pentatricopeptide repeat-containing protein, mitochondrial-like [Capsicum annuum]	-	-	-	-	-	-	-	--
Unigene0000954	2.393	2.494	2.438	0.942	0.728	0.135	Dctpp1	XP_006354469.1 PREDICTED: dCTP pyrophosphatase 1-like [Solanum tuberosum]	Metabolism;Metabolism	Global and overview maps;Nucleotide metabolism	ko01100//Metabolic pathways;ko00240//Pyrimidine metabolism	K16904;K16904	-	GO:0047429//nucleoside-triphosphate diphosphatase activity	GO:0009143//nucleoside triphosphate catabolic process	--
Unigene0000955	0	0	0.382	0.486	0	0	--	-	-	-	-	-	-	-	-	--
Unigene0000956	0.69	0.646	0.5	5.145	5.607	5.352	--	XP_019254595.1 PREDICTED: uncharacterized protein LOC109233241 [Nicotiana attenuata]	-	-	-	-	-	-	GO:0015743//malate transport	--
Unigene0000957	0	0	0	0	1.175	0	--	KAH0687927.1 hypothetical protein KY284_018480 [Solanum tuberosum]	-	-	-	-	-	GO:0004386//helicase activity	-	--
Unigene0000958	4.909	1.768	3.569	0	1.547	0	--	KAH0713845.1 hypothetical protein KY289_009804 [Solanum tuberosum]	-	-	-	-	-	-	-	--
Unigene0000959	0.41	0.587	0.307	0.877	1.37	0.734	--	EEF27698.1 conserved hypothetical protein [Ricinus communis]	-	-	-	-	-	-	-	--
Unigene0000961	0.344	0.51	0.289	0	0	0	--	-	-	-	-	-	-	-	-	--
Unigene0000962	0.426	0.422	0.896	0	0	0	--	-	-	-	-	-	-	-	-	--
Unigene0000963	0.81	0.931	1.582	0.935	0.712	1.287	--	KAH0709195.1 hypothetical protein KY284_010622 [Solanum tuberosum]	-	-	-	-	-	-	-	--
Unigene0000964	1.241	1.229	2.389	0.379	0.205	0.19	--	-	-	-	-	-	-	-	GO:0007155//cell adhesion	--
Unigene0000965	13.488	15.918	14.709	14.599	15.982	14.588	THO1	KAH0728369.1 hypothetical protein KY284_004234 [Solanum tuberosum]	Genetic Information Processing;Genetic Information Processing	Transcription;Translation	ko03040//Spliceosome;ko03013//Nucleocytoplasmic transport	K12878;K12878	GO:0000347//THO complex;GO:0005575//cellular_component;GO:0005622//intracellular anatomical structure;GO:0005634//nucleus;GO:0032991//protein-containing complex;GO:0043226//organelle;GO:0043227//membrane-bounded organelle;GO:0043229//intracellular organelle;GO:0043231//intracellular membrane-bounded organelle	GO:0003674//molecular_function;GO:0003676//nucleic acid binding;GO:0003723//RNA binding;GO:0005488//binding;GO:0097159//organic cyclic compound binding;GO:1901363//heterocyclic compound binding	GO:0000160//phosphorelay signal transduction system;GO:0006139//nucleobase-containing compound metabolic process;GO:0006351//transcription, DNA-templated;GO:0006354//DNA-templated transcription, elongation;GO:0006366//transcription by RNA polymerase II;GO:0006368//transcription elongation from RNA polymerase II promoter;GO:0006396//RNA processing;GO:0006397//mRNA processing;GO:0006403//RNA locali…	--
Unigene0000966	11.535	9.698	13.925	5.583	1.761	2.804	AAO1	XP_009600612.1 abscisic-aldehyde oxidase-like [Nicotiana tomentosiformis]	Metabolism;Metabolism;Metabolism	Global and overview maps;Global and overview maps;Metabolism of terpenoids and polyketides	ko01100//Metabolic pathways;ko01110//Biosynthesis of secondary metabolites;ko00906//Carotenoid biosynthesis	K09842;K09842;K09842	-	GO:0004854//xanthine dehydrogenase activity;GO:0009055//electron transfer activity;GO:0016491//oxidoreductase activity;GO:0043546//molybdopterin cofactor binding;GO:0046872//metal ion binding;GO:0051536//iron-sulfur cluster binding	GO:0009115//xanthine catabolic process;GO:0046415//urate metabolic process	--
Unigene0000967	0.446	0.238	0.548	1.759	0.436	1.215	AAO4	XP_019235874.1 PREDICTED: benzaldehyde dehydrogenase (NAD(+))-like isoform X1 [Nicotiana attenuata]	Metabolism;Metabolism;Metabolism	Global and overview maps;Global and overview maps;Metabolism of terpenoids and polyketides	ko01100//Metabolic pathways;ko01110//Biosynthesis of secondary metabolites;ko00906//Carotenoid biosynthesis	K09842;K09842;K09842	-	GO:0004854//xanthine dehydrogenase activity;GO:0009055//electron transfer activity;GO:0016491//oxidoreductase activity;GO:0043546//molybdopterin cofactor binding;GO:0046872//metal ion binding;GO:0051536//iron-sulfur cluster binding	GO:0009115//xanthine catabolic process;GO:0046415//urate metabolic process	--
Unigene0000968	14.59	16.339	17.776	385.751	488.736	372.54	COMT	QDL52646.1 caffeate O-methyltransferase [Lycium chinense]	Metabolism;Metabolism;Metabolism;Metabolism	Global and overview maps;Global and overview maps;Biosynthesis of other secondary metabolites;Amino acid metabolism	ko01100//Metabolic pathways;ko01110//Biosynthesis of secondary metabolites;ko00940//Phenylpropanoid biosynthesis;ko00380//Tryptophan metabolism	K13066;K13066;K13066;K13066	GO:0005575//cellular_component;GO:0005622//intracellular anatomical structure;GO:0005634//nucleus;GO:0005737//cytoplasm;GO:0005886//plasma membrane;GO:0005911//cell-cell junction;GO:0009506//plasmodesma;GO:0016020//membrane;GO:0030054//cell junction;GO:0043226//organelle;GO:0043227//membrane-bounded organelle;GO:0043229//intracellular organelle;GO:0043231//intracellular membrane-bounded organelle…	GO:0003674//molecular_function;GO:0003824//catalytic activity;GO:0005488//binding;GO:0005515//protein binding;GO:0008168//methyltransferase activity;GO:0008171//O-methyltransferase activity;GO:0008757//S-adenosylmethionine-dependent methyltransferase activity;GO:0016740//transferase activity;GO:0016741//transferase activity, transferring one-carbon groups;GO:0017096//acetylserotonin O-methyltrans…	GO:0006725//cellular aromatic compound metabolic process;GO:0006807//nitrogen compound metabolic process;GO:0008150//biological_process;GO:0008152//metabolic process;GO:0009058//biosynthetic process;GO:0009698//phenylpropanoid metabolic process;GO:0009699//phenylpropanoid biosynthetic process;GO:0009808//lignin metabolic process;GO:0009809//lignin biosynthetic process;GO:0009812//flavonoid metabo…	--
Unigene0000969	0.401	0.298	0.338	6.596	10.553	3.824	COMT	QDL52646.1 caffeate O-methyltransferase [Lycium chinense]	Metabolism;Metabolism;Metabolism;Metabolism	Global and overview maps;Global and overview maps;Biosynthesis of other secondary metabolites;Amino acid metabolism	ko01100//Metabolic pathways;ko01110//Biosynthesis of secondary metabolites;ko00940//Phenylpropanoid biosynthesis;ko00380//Tryptophan metabolism	K13066;K13066;K13066;K13066	-	GO:0008171//O-methyltransferase activity	GO:0016051//carbohydrate biosynthetic process	--
Unigene0000970	0.886	0.957	1.357	0	0	0	--	-	-	-	-	-	-	-	-	--
Unigene0000972	0	0	0	1.094	0.845	1.412	--	XP_016446643.1 PREDICTED: uncharacterized protein LOC107771713 [Nicotiana tabacum]	-	-	-	-	-	-	-	--
Unigene0000973	0	0	0.4	0.635	0.412	1.275	--	-	-	-	-	-	-	-	-	--
Unigene0000974	0.098	0.193	0.246	1.042	0.338	0.314	--	-	-	-	-	-	-	-	-	--
Unigene0000975	96.018	127.587	110.32	112.564	105.152	92.188	CURT1D	XP_019256988.1 PREDICTED: protein CURVATURE THYLAKOID 1B, chloroplastic-like [Nicotiana attenuata]	-	-	-	-	GO:0005575//cellular_component;GO:0005622//intracellular anatomical structure;GO:0005737//cytoplasm;GO:0009507//chloroplast;GO:0009534//chloroplast thylakoid;GO:0009535//chloroplast thylakoid membrane;GO:0009536//plastid;GO:0009579//thylakoid;GO:0016020//membrane;GO:0016021//integral component of membrane;GO:0031224//intrinsic component of membrane;GO:0031976//plastid thylakoid;GO:0031984//organe…	-	-	--
Unigene0000977	0.694	0.412	0.234	0.297	0.802	0.149	CURT1D	XP_009761341.1 PREDICTED: protein CURVATURE THYLAKOID 1D, chloroplastic [Nicotiana sylvestris]	-	-	-	-	GO:0005575//cellular_component;GO:0005622//intracellular anatomical structure;GO:0005737//cytoplasm;GO:0009507//chloroplast;GO:0009534//chloroplast thylakoid;GO:0009535//chloroplast thylakoid membrane;GO:0009536//plastid;GO:0009579//thylakoid;GO:0016020//membrane;GO:0016021//integral component of membrane;GO:0031224//intrinsic component of membrane;GO:0031976//plastid thylakoid;GO:0031984//organe…	-	-	--
Unigene0000978	0.318	0.693	0.321	3.674	7.282	8.062	ATL60	XP_015158305.1 PREDICTED: RING-H2 finger protein ATL3-like [Solanum tuberosum]	-	-	-	-	GO:0000109//nucleotide-excision repair complex;GO:0005680//anaphase-promoting complex	GO:0008270//zinc ion binding;GO:0046872//metal ion binding;GO:0061630//ubiquitin protein ligase activity;GO:0097602//cullin family protein binding	GO:0006289//nucleotide-excision repair;GO:0031145//anaphase-promoting complex-dependent catabolic process	--
Unigene0000979	1.139	0.902	0.256	0.081	0.088	0.163	--	XP_016505294.1 PREDICTED: tubulin--tyrosine ligase-like protein 12 [Nicotiana tabacum]	-	-	-	-	-	GO:0000166//nucleotide binding;GO:0003674//molecular_function;GO:0005198//structural molecule activity;GO:0005488//binding;GO:0005524//ATP binding;GO:0017076//purine nucleotide binding;GO:0030554//adenyl nucleotide binding;GO:0032553//ribonucleotide binding;GO:0032555//purine ribonucleotide binding;GO:0032559//adenyl ribonucleotide binding;GO:0035639//purine ribonucleoside triphosphate binding;GO…	GO:0006464//cellular protein modification process;GO:0006807//nitrogen compound metabolic process;GO:0008150//biological_process;GO:0008152//metabolic process;GO:0009987//cellular process;GO:0019538//protein metabolic process;GO:0036211//protein modification process;GO:0043170//macromolecule metabolic process;GO:0043412//macromolecule modification;GO:0044237//cellular metabolic process;GO:0044238…	--
Unigene0000981	0.604	0.199	0.508	0.645	0	0.432	--	-	-	-	-	-	-	-	-	--
Unigene0000982	0	1.091	0	0	0	0	--	-	-	-	-	-	-	-	-	--
Unigene0000983	9.021	14.421	18.574	2.788	3.015	1.4	--	-	-	-	-	-	-	-	-	--
Unigene0000984	3.205	3.615	4.085	2.284	3.241	1.768	At5g43822	XP_019244868.1 PREDICTED: uncharacterized protein At5g43822-like [Nicotiana attenuata]	-	-	-	-	-	GO:0003676//nucleic acid binding;GO:0008408//3'-5' exonuclease activity	GO:0006139//nucleobase-containing compound metabolic process	--
Unigene0000985	0.487	1.17	0.936	0.446	0.321	0.224	--	-	-	-	-	-	-	-	-	--
Unigene0000986	95.914	109.772	143.618	163.492	190.056	193.416	GME-1	NP_001234734.1 GDP-mannose 3',5'-epimerase [Solanum lycopersicum]	Metabolism;Metabolism;Metabolism;Metabolism	Global and overview maps;Global and overview maps;Carbohydrate metabolism;Carbohydrate metabolism	ko01100//Metabolic pathways;ko01110//Biosynthesis of secondary metabolites;ko00520//Amino sugar and nucleotide sugar metabolism;ko00053//Ascorbate and aldarate metabolism	K10046;K10046;K10046;K10046	GO:0005575//cellular_component;GO:0005622//intracellular anatomical structure;GO:0005737//cytoplasm;GO:0005829//cytosol	GO:0000166//nucleotide binding;GO:0003674//molecular_function;GO:0003824//catalytic activity;GO:0003854//3-beta-hydroxy-delta5-steroid dehydrogenase activity;GO:0003978//UDP-glucose 4-epimerase activity;GO:0005488//binding;GO:0008460//dTDP-glucose 4,6-dehydratase activity;GO:0008712//ADP-glyceromanno-heptose 6-epimerase activity;GO:0016616//oxidoreductase activity, acting on the CH-OH group of do…	GO:0005975//carbohydrate metabolic process;GO:0005996//monosaccharide metabolic process;GO:0006012//galactose metabolic process;GO:0006082//organic acid metabolic process;GO:0006694//steroid biosynthetic process;GO:0006766//vitamin metabolic process;GO:0006767//water-soluble vitamin metabolic process;GO:0008150//biological_process;GO:0008152//metabolic process;GO:0009058//biosynthetic process;GO:…	--
Unigene0000989	0	0	0	0.198	1.709	1.19	--	-	-	-	-	-	-	-	-	--
Unigene0000990	0	0.572	0.972	0	0.445	0	--	-	-	-	-	-	-	-	-	--
Unigene0000992	18.452	17.439	24.269	41.978	48.559	44.39	TPR4	XP_009803406.1 PREDICTED: topless-related protein 4-like isoform X1 [Nicotiana sylvestris]	-	-	-	-	GO:0005575//cellular_component;GO:0005622//intracellular anatomical structure;GO:0005634//nucleus;GO:0043226//organelle;GO:0043227//membrane-bounded organelle;GO:0043229//intracellular organelle;GO:0043231//intracellular membrane-bounded organelle	GO:0005515//protein binding	GO:0000003//reproduction;GO:0003006//developmental process involved in reproduction;GO:0006139//nucleobase-containing compound metabolic process;GO:0006351//transcription, DNA-templated;GO:0006355//regulation of transcription, DNA-templated;GO:0006725//cellular aromatic compound metabolic process;GO:0006807//nitrogen compound metabolic process;GO:0007275//multicellular organism development;GO:000…	--
Unigene0000993	5.509	6.115	4.785	3.376	2.92	3.805	CRK3	KAG5593010.1 hypothetical protein H5410_043524 [Solanum commersonii]	-	-	-	-	GO:0005575//cellular_component;GO:0005618//cell wall;GO:0005886//plasma membrane;GO:0009505//plant-type cell wall;GO:0009531//secondary cell wall;GO:0016020//membrane;GO:0016021//integral component of membrane;GO:0030312//external encapsulating structure;GO:0031224//intrinsic component of membrane;GO:0048226//Casparian strip;GO:0071944//cell periphery	GO:0000166//nucleotide binding;GO:0003674//molecular_function;GO:0003824//catalytic activity;GO:0004672//protein kinase activity;GO:0004674//protein serine/threonine kinase activity;GO:0005488//binding;GO:0005515//protein binding;GO:0005524//ATP binding;GO:0016301//kinase activity;GO:0016740//transferase activity;GO:0016772//transferase activity, transferring phosphorus-containing groups;GO:00167…	GO:0000003//reproduction;GO:0003006//developmental process involved in reproduction;GO:0006464//cellular protein modification process;GO:0006468//protein phosphorylation;GO:0006793//phosphorus metabolic process;GO:0006796//phosphate-containing compound metabolic process;GO:0006807//nitrogen compound metabolic process;GO:0007275//multicellular organism development;GO:0007389//pattern specification…	--
Unigene0000994	0	0.208	0.883	0	0	0	--	XP_009793183.1 PREDICTED: uncharacterized protein LOC104240099 [Nicotiana sylvestris]	-	-	-	-	-	-	-	--
Unigene0000995	0	0	0.333	0	0	0	--	-	-	-	-	-	-	-	-	--
Unigene0000996	0	0	1.145	0	0.262	0	Tf2-11	KAH0660587.1 hypothetical protein KY289_029335 [Solanum tuberosum]	-	-	-	-	-	-	-	--
Unigene0000997	0.283	0	0	0	0	0	TY3B-G	XP_016485847.1 PREDICTED: uncharacterized protein LOC107806237 [Nicotiana tabacum]	-	-	-	-	-	-	GO:0015074//DNA integration	--
Unigene0000998	1.716	0.566	1.625	0.306	0.413	0.307	--	KAH0712657.1 hypothetical protein KY289_008616 [Solanum tuberosum]	-	-	-	-	-	-	-	--
Unigene0000999	1.812	1.086	1.565	0.713	0.275	0.409	NLP3	XP_006354248.2 PREDICTED: protein NLP4-like isoform X1 [Solanum tuberosum]	-	-	-	-	-	-	-	--
Unigene0001000	22.581	19.006	22.777	3.577	3.635	2.814	RBL9	XP_019229969.1 PREDICTED: RHOMBOID-like protein 9, chloroplastic [Nicotiana attenuata]	-	-	-	-	GO:0005575//cellular_component;GO:0005622//intracellular anatomical structure;GO:0005737//cytoplasm;GO:0005886//plasma membrane;GO:0005887//integral component of plasma membrane;GO:0009507//chloroplast;GO:0009526//plastid envelope;GO:0009536//plastid;GO:0009941//chloroplast envelope;GO:0016020//membrane;GO:0016021//integral component of membrane;GO:0031090//organelle membrane;GO:0031224//intrinsi…	GO:0003674//molecular_function;GO:0003824//catalytic activity;GO:0004175//endopeptidase activity;GO:0004252//serine-type endopeptidase activity;GO:0008233//peptidase activity;GO:0008236//serine-type peptidase activity;GO:0016787//hydrolase activity;GO:0017171//serine hydrolase activity;GO:0140096//catalytic activity, acting on a protein	GO:0006464//cellular protein modification process;GO:0006508//proteolysis;GO:0006807//nitrogen compound metabolic process;GO:0008150//biological_process;GO:0008152//metabolic process;GO:0019538//protein metabolic process;GO:0043170//macromolecule metabolic process;GO:0044238//primary metabolic process;GO:0071704//organic substance metabolic process;GO:1901564//organonitrogen compound metabolic pr…	--
Unigene0001001	4.151	5.597	4.238	6.325	5.41	4.741	--	-	-	-	-	-	-	-	-	--
Unigene0001002	6.333	7.118	7.492	10.062	9.297	7.717	PP2A15	XP_016484851.1 PREDICTED: F-box protein PP2-A15-like [Nicotiana tabacum]	-	-	-	-	-	GO:0005515//protein binding	-	--
Unigene0001003	0	0	0.139	1.412	1.717	1.595	--	TMX00671.1 hypothetical protein EJD97_000384 [Solanum chilense]	-	-	-	-	-	-	-	--
Unigene0001004	0.26	0.774	0.548	0.835	1.655	1.537	PP2A15	KAF3637372.1 F-box protein PP2-A15 [Capsicum annuum]	-	-	-	-	-	-	-	--
Unigene0001005	4.917	4.148	7.052	11.875	11.998	7.625	PP2A15	PHU05201.1 F-box protein PP2-A15 [Capsicum chinense]	-	-	-	-	-	-	-	--
Unigene0001006	8.519	5.102	16.715	1.102	2.382	1.991	PP2A15	XP_004249466.1 F-box protein PP2-A15 [Solanum lycopersicum]	-	-	-	-	-	GO:0005515//protein binding	-	--
Unigene0001007	1.777	1.271	0.914	0	0.342	0	At1g54070	XP_016578516.1 PREDICTED: uncharacterized protein LOC107876052 [Capsicum annuum]	-	-	-	-	-	-	-	--
Unigene0001009	12.761	18.99	17.138	26.729	27.28	23.121	--	XP_004230166.1 39S ribosomal protein L45, mitochondrial isoform X1 [Solanum lycopersicum]	-	-	-	-	GO:0000793//condensed chromosome;GO:0005575//cellular_component;GO:0005576//extracellular region;GO:0005622//intracellular anatomical structure;GO:0005634//nucleus;GO:0005694//chromosome;GO:0005737//cytoplasm;GO:0005743//mitochondrial inner membrane;GO:0030915//Smc5-Smc6 complex;GO:0032991//protein-containing complex;GO:0043226//organelle;GO:0043227//membrane-bounded organelle;GO:0043228//non-mem…	GO:0003674//molecular_function;GO:0003824//catalytic activity;GO:0016787//hydrolase activity;GO:0016788//hydrolase activity, acting on ester bonds	GO:0006139//nucleobase-containing compound metabolic process;GO:0006259//DNA metabolic process;GO:0006281//DNA repair;GO:0006310//DNA recombination;GO:0006464//cellular protein modification process;GO:0006629//lipid metabolic process;GO:0006725//cellular aromatic compound metabolic process;GO:0006807//nitrogen compound metabolic process;GO:0006950//response to stress;GO:0006974//cellular response…	--
Unigene0001010	0	0	0.298	0	0.818	0	--	-	-	-	-	-	-	-	GO:0006310//DNA recombination	--
Unigene0001011	0.16	0.791	0.269	0.512	1.292	0.686	LEGA	KAG5588175.1 hypothetical protein H5410_048609 [Solanum commersonii]	-	-	-	-	-	-	-	--
Unigene0001012	0	0.349	0	0	0	0	--	-	-	-	-	-	-	-	-	--
Unigene0001013	1.653	1.804	2.355	0.679	0.637	0.227	--	-	-	-	-	-	-	-	-	--
Unigene0001014	29.203	19.202	22.196	8.275	7.087	9.462	KRP4	XP_016450304.1 PREDICTED: cyclin-dependent kinase inhibitor 4-like isoform X2 [Nicotiana tabacum]	-	-	-	-	GO:0005634//nucleus	GO:0004861//cyclin-dependent protein serine/threonine kinase inhibitor activity	-	--
Unigene0001016	0.78	0.772	1.548	0.298	0.322	0.359	--	KZN06643.1 hypothetical protein DCAR_007480 [Daucus carota subsp. sativus] [Daucus carota]	-	-	-	-	-	-	-	--
Unigene0001019	0.824	0.612	1.56	0	0	0	--	-	-	-	-	-	-	-	-	--
Unigene0001020	0	0	0.556	0	0	0	--	-	-	-	-	-	GO:0055036//virion membrane	-	-	--
Unigene0001021	0.33	1.088	2.683	0.235	1.016	0.236	--	-	-	-	-	-	-	-	-	--
Unigene0001022	0.54	3.637	1.91	0.346	0.936	0.406	APE1L	KAH6781857.1 DNAse I-like superfamily protein [Perilla frutescens var. frutescens] [Perilla frutescens]	-	-	-	-	-	GO:0008853//exodeoxyribonuclease III activity	GO:0006281//DNA repair;GO:0043571//maintenance of CRISPR repeat elements	--
Unigene0001023	6.2	4.671	6.524	4.25	4.985	5.136	APE1L	XP_006351451.1 PREDICTED: DNA-(apurinic or apyrimidinic site) lyase [Solanum tuberosum]	-	-	-	-	GO:0005575//cellular_component;GO:0005622//intracellular anatomical structure;GO:0005634//nucleus;GO:0005730//nucleolus;GO:0005737//cytoplasm;GO:0005783//endoplasmic reticulum;GO:0009507//chloroplast;GO:0009536//plastid;GO:0031974//membrane-enclosed lumen;GO:0031981//nuclear lumen;GO:0043226//organelle;GO:0043227//membrane-bounded organelle;GO:0043228//non-membrane-bounded organelle;GO:0043229//i…	GO:0003674//molecular_function;GO:0003676//nucleic acid binding;GO:0003677//DNA binding;GO:0003824//catalytic activity;GO:0003906//DNA-(apurinic or apyrimidinic site) endonuclease activity;GO:0004518//nuclease activity;GO:0004519//endonuclease activity;GO:0004520//endodeoxyribonuclease activity;GO:0004527//exonuclease activity;GO:0004529//exodeoxyribonuclease activity;GO:0004536//deoxyribonucleas…	GO:0006139//nucleobase-containing compound metabolic process;GO:0006259//DNA metabolic process;GO:0006281//DNA repair;GO:0006284//base-excision repair;GO:0006725//cellular aromatic compound metabolic process;GO:0006807//nitrogen compound metabolic process;GO:0006950//response to stress;GO:0006974//cellular response to DNA damage stimulus;GO:0008150//biological_process;GO:0008152//metabolic proces…	--
Unigene0001024	0.381	0.094	0.962	0.61	0.66	0.307	--	-	-	-	-	-	-	-	-	--
Unigene0001026	2.735	2.114	3.564	3.043	5.022	5.55	--	-	-	-	-	-	-	-	-	--
Unigene0001027	3.377	3.296	4.061	1.186	1.673	2.123	--	-	-	-	-	-	-	-	-	--
Unigene0001028	3.086	1.018	2.251	1.319	3.328	0.11	--	-	-	-	-	-	-	-	-	--
Unigene0001029	0	0.841	1.501	3.54	1.718	1.459	--	-	-	-	-	-	-	GO:0003674//molecular_function	GO:0043571//maintenance of CRISPR repeat elements	--
Unigene0001030	0	0.252	0.214	0.815	0.881	0.273	--	-	-	-	-	-	-	-	-	--
Unigene0001031	8.191	7.724	13.243	7.643	13.673	8.234	--	-	-	-	-	-	-	GO:0000976//transcription cis-regulatory region binding;GO:0004197//cysteine-type endopeptidase activity	GO:0043687//post-translational protein modification	--
Unigene0001033	0.849	1.093	1.072	0.045	0.245	0.046	aifA	KAH0673486.1 hypothetical protein KY284_024573 [Solanum tuberosum]	-	-	-	-	-	GO:0004148//dihydrolipoyl dehydrogenase activity;GO:0004362//glutathione-disulfide reductase (NADPH) activity;GO:0015036//disulfide oxidoreductase activity;GO:0016152//mercury (II) reductase activity;GO:0016491//oxidoreductase activity;GO:0016668//oxidoreductase activity, acting on a sulfur group of donors, NAD(P) as acceptor;GO:0016701//oxidoreductase activity, acting on single donors with incor…	GO:0006096//glycolytic process;GO:0006744//ubiquinone biosynthetic process;GO:0006790//sulfur compound metabolic process;GO:0006805//xenobiotic metabolic process;GO:0006813//potassium ion transport;GO:0009398//FMN biosynthetic process;GO:0010126//mycothiol metabolic process;GO:0015995//chlorophyll biosynthetic process;GO:0030494//bacteriochlorophyll biosynthetic process;GO:0045454//cell redox hom…	--
Unigene0001034	0.728	0.721	0.204	0	0.842	0	--	-	-	-	-	-	-	-	-	--
Unigene0001035	0.253	0	0	0	0	0	--	-	-	-	-	-	-	-	-	--
Unigene0001037	4.092	2.953	3.036	0.297	1.122	1.191	--	XP_009794169.1 PREDICTED: TPR repeat-containing thioredoxin TTL1 [Nicotiana sylvestris]	-	-	-	-	-	-	-	--
Unigene0001038	0	0	0	23.104	19.966	29.327	--	KAH0644409.1 hypothetical protein KY284_032293 [Solanum tuberosum]	-	-	-	-	GO:0005576//extracellular region	-	GO:0006879//cellular iron ion homeostasis	--
Unigene0001039	1.1	1.867	1.19	7.894	8.716	7.927	--	XP_033513207.1 protein NIM1-INTERACTING 2 [Nicotiana tomentosiformis]	-	-	-	-	-	-	-	--
Unigene0001040	1.565	0.581	0.494	0.976	1.055	0.56	RE2	KAH0637483.1 hypothetical protein KY289_037398 [Solanum tuberosum]	-	-	-	-	-	-	-	--
Unigene0001041	0.29	0.383	0.977	1.345	0.783	0.519	--	XP_016442574.1 PREDICTED: uncharacterized protein LOC107767985 [Nicotiana tabacum]	-	-	-	-	-	-	-	--
Unigene0001042	1.709	0.98	2.158	2.452	1.975	2.559	--	XP_019244610.1 PREDICTED: uncharacterized protein LOC109224488 [Nicotiana attenuata]	-	-	-	-	-	-	-	--
Unigene0001043	0.877	2.56	2.099	6.564	3.682	5.948	CNX1	XP_009627792.1 calnexin homolog 1-like [Nicotiana tomentosiformis]	Genetic Information Processing;Cellular Processes	Folding, sorting and degradation;Transport and catabolism	ko04141//Protein processing in endoplasmic reticulum;ko04145//Phagosome	K08054;K08054	GO:0005783//endoplasmic reticulum	GO:0005509//calcium ion binding;GO:0051082//unfolded protein binding	GO:0006457//protein folding	--
Unigene0001044	14.065	17.573	18.039	44.001	29.958	35.336	LBD38	KAG5623837.1 hypothetical protein H5410_009055 [Solanum commersonii]	-	-	-	-	-	-	-	LBD
Unigene0001045	0.918	0.303	0.344	0.218	0.236	0.219	--	XP_016436161.1 PREDICTED: uncharacterized protein LOC107762330 [Nicotiana tabacum]	-	-	-	-	-	GO:0046983//protein dimerization activity	-	--
Unigene0001046	0.252	0	0	0	0	0	--	-	-	-	-	-	-	-	-	--
Unigene0001048	0.12	0.596	0.203	0.772	0.974	0.129	--	KAF3626498.1 DNA polymerase epsilon catalytic subunit B [Capsicum annuum]	Genetic Information Processing	Replication and repair	ko03440//Homologous recombination	K04728	-	-	-	--
Unigene0001049	0	0	0	1.099	0.891	0	--	-	-	-	-	-	-	-	-	--
Unigene0001050	0	0	0	0.222	0.481	0	--	-	-	-	-	-	-	-	-	--
Unigene0001051	1.846	0	0.23	1.681	2.845	0	--	-	-	-	-	-	-	-	GO:0042742//defense response to bacterium	--
Unigene0001052	42.158	40.87	42.087	37.033	42.663	45.193	VAR3	KAH0730210.1 hypothetical protein KY289_001398 [Solanum tuberosum]	-	-	-	-	-	-	-	--
Unigene0001054	5.185	2.63	3.833	2.163	1.9	2.172	At5g63020	PHT52182.1 hypothetical protein CQW23_06644 [Capsicum baccatum]	Organismal Systems	Environmental adaptation	ko04626//Plant-pathogen interaction	K13459	-	GO:0005515//protein binding	-	--
Unigene0001056	71.545	69.672	70.374	16.967	13.352	11.083	Os02g0104700	XP_009771637.1 PREDICTED: putative nitric oxide synthase [Nicotiana sylvestris]	Metabolism;Metabolism;Organismal Systems;Metabolism;Metabolism	Global and overview maps;Global and overview maps;Environmental adaptation;Amino acid metabolism;Amino acid metabolism	ko01100//Metabolic pathways;ko01110//Biosynthesis of secondary metabolites;ko04626//Plant-pathogen interaction;ko00330//Arginine and proline metabolism;ko00220//Arginine biosynthesis	K13427;K13427;K13427;K13427;K13427	GO:0005575//cellular_component;GO:0005622//intracellular anatomical structure;GO:0005737//cytoplasm;GO:0005739//mitochondrion;GO:0009507//chloroplast;GO:0009536//plastid;GO:0043226//organelle;GO:0043227//membrane-bounded organelle;GO:0043229//intracellular organelle;GO:0043231//intracellular membrane-bounded organelle	GO:0000166//nucleotide binding;GO:0001882//nucleoside binding;GO:0001883//purine nucleoside binding;GO:0003674//molecular_function;GO:0003824//catalytic activity;GO:0003924//GTPase activity;GO:0004497//monooxygenase activity;GO:0004517//nitric-oxide synthase activity;GO:0005488//binding;GO:0005524//ATP binding;GO:0005525//GTP binding;GO:0016462//pyrophosphatase activity;GO:0016491//oxidoreductase…	GO:0000302//response to reactive oxygen species;GO:0001101//response to acid chemical;GO:0001505//regulation of neurotransmitter levels;GO:0006109//regulation of carbohydrate metabolic process;GO:0006400//tRNA modification;GO:0006412//translation;GO:0006576//cellular biogenic amine metabolic process;GO:0006807//nitrogen compound metabolic process;GO:0006809//nitric oxide biosynthetic process;GO:0…	--
Unigene0001057	10.719	7.92	11.976	29.678	34.4	28.996	abkC	XP_004234135.1 probable serine/threonine-protein kinase abkC isoform X2 [Solanum lycopersicum]	-	-	-	-	-	GO:0016709//oxidoreductase activity, acting on paired donors, with incorporation or reduction of molecular oxygen, NAD(P)H as one donor, and incorporation of one atom of oxygen	GO:0006744//ubiquinone biosynthetic process	--
Unigene0001058	1.795	1.382	2.182	0.426	0.346	0.856	--	XP_006351206.1 PREDICTED: uncharacterized protein LOC102606099 [Solanum tuberosum]	-	-	-	-	-	-	-	--
Unigene0001059	2.268	1.258	1.884	1.358	2.342	1.818	--	XP_016464626.1 PREDICTED: kinesin light chain 4-like [Nicotiana tabacum]	-	-	-	-	GO:0016021//integral component of membrane	-	GO:0016192//vesicle-mediated transport	--
Unigene0001060	1.362	0.997	1.096	0.443	0.205	0.254	--	XP_009765878.1 PREDICTED: uncharacterized protein LOC104217350 [Nicotiana sylvestris]	-	-	-	-	-	-	-	--
Unigene0001061	0.784	2.019	1.848	1.844	0	0	rpl23	CAB1097148.1 unnamed protein product [Ectocarpus sp. CCAP 1310/34]	Genetic Information Processing	Translation	ko03010//Ribosome	K02894	GO:0000315//organellar large ribosomal subunit;GO:0005840//ribosome;GO:0022625//cytosolic large ribosomal subunit	GO:0003735//structural constituent of ribosome	GO:0006412//translation	--
Unigene0001062	0	0	1.015	0.161	0	0.647	RPS5	XP_030529863.1 40S ribosomal protein S5-like [Rhodamnia argentea]	Genetic Information Processing	Translation	ko03010//Ribosome	K02989	GO:0000314//organellar small ribosomal subunit;GO:0016020//membrane;GO:0022627//cytosolic small ribosomal subunit	GO:0003735//structural constituent of ribosome;GO:0008083//growth factor activity	GO:0006412//translation	--
Unigene0001063	0.283	0.42	0.476	0.302	0.163	1.213	RPS5	XP_030529863.1 40S ribosomal protein S5-like [Rhodamnia argentea]	Genetic Information Processing	Translation	ko03010//Ribosome	K02989	GO:0000314//organellar small ribosomal subunit;GO:0022627//cytosolic small ribosomal subunit	GO:0003735//structural constituent of ribosome	GO:0006412//translation	--
Unigene0001066	0	0	0.472	0.2	0.216	0	--	KAH0727041.1 hypothetical protein KY284_002906 [Solanum tuberosum]	-	-	-	-	GO:0016020//membrane	GO:0005515//protein binding;GO:0043531//ADP binding	GO:0007165//signal transduction	--
Unigene0001067	1.377	0.372	0.738	0	0	0	--	XP_019231831.1 PREDICTED: TMV resistance protein N-like isoform X1 [Nicotiana attenuata]	-	-	-	-	-	GO:0005515//protein binding;GO:0043531//ADP binding	GO:0007165//signal transduction	--
Unigene0001068	0	0	0	0	0.364	0	--	XP_009801307.1 PREDICTED: TMV resistance protein N-like [Nicotiana sylvestris]	-	-	-	-	-	GO:0005515//protein binding;GO:0043531//ADP binding	GO:0007165//signal transduction	--
Unigene0001070	0.219	0.433	0	0.234	0	0.704	--	XP_019231831.1 PREDICTED: TMV resistance protein N-like isoform X1 [Nicotiana attenuata]	-	-	-	-	-	GO:0005515//protein binding;GO:0043531//ADP binding	GO:0007165//signal transduction	--
Unigene0001071	0	1.094	1.861	0.148	0.639	0	RPV1	XP_009801307.1 PREDICTED: TMV resistance protein N-like [Nicotiana sylvestris]	-	-	-	-	-	GO:0005515//protein binding;GO:0043531//ADP binding	GO:0007165//signal transduction	--
Unigene0001072	8.323	8.385	8.333	5.481	5.023	5.253	At2g48060/At2g48040/At2g48050	PHT86309.1 Piezo-type mechanosensitive ion channel -like protein [Capsicum annuum]	-	-	-	-	GO:0005575//cellular_component;GO:0016020//membrane;GO:0016021//integral component of membrane;GO:0031224//intrinsic component of membrane	GO:0003674//molecular_function;GO:0005215//transporter activity;GO:0005216//ion channel activity;GO:0005261//cation channel activity;GO:0005515//protein binding;GO:0008324//cation transmembrane transporter activity;GO:0008381//mechanosensitive ion channel activity;GO:0015075//ion transmembrane transporter activity;GO:0015267//channel activity;GO:0015318//inorganic molecular entity transmembrane t…	GO:0006810//transport;GO:0006811//ion transport;GO:0006812//cation transport;GO:0008150//biological_process;GO:0009581//detection of external stimulus;GO:0009582//detection of abiotic stimulus;GO:0009605//response to external stimulus;GO:0009612//response to mechanical stimulus;GO:0009628//response to abiotic stimulus;GO:0009987//cellular process;GO:0034220//ion transmembrane transport;GO:0042391…	--
Unigene0001074	0	0.718	0.153	0.388	0	0	--	KAG5627774.1 hypothetical protein H5410_012992 [Solanum commersonii]	-	-	-	-	-	-	-	--
Unigene0001076	9.482	8.379	10.058	13.681	11.868	14.333	PCFS4	KAH0724010.1 hypothetical protein KY289_007054 [Solanum tuberosum]	Genetic Information Processing	Translation	ko03015//mRNA surveillance pathway	K14400	-	-	-	--
Unigene0001077	0.522	0	1.427	0.279	0.301	0.28	--	-	-	-	-	-	-	-	-	--
Unigene0001078	27.397	30.795	31.446	15.859	15.846	16.223	TOC90	XP_006359492.1 PREDICTED: translocase of chloroplast 90, chloroplastic [Solanum tuberosum]	-	-	-	-	GO:0005575//cellular_component;GO:0005622//intracellular anatomical structure;GO:0005737//cytoplasm;GO:0009507//chloroplast;GO:0009526//plastid envelope;GO:0009527//plastid outer membrane;GO:0009536//plastid;GO:0009707//chloroplast outer membrane;GO:0009941//chloroplast envelope;GO:0016020//membrane;GO:0016021//integral component of membrane;GO:0019867//outer membrane;GO:0031090//organelle membra…	GO:0000166//nucleotide binding;GO:0001882//nucleoside binding;GO:0001883//purine nucleoside binding;GO:0003674//molecular_function;GO:0003824//catalytic activity;GO:0003924//GTPase activity;GO:0005488//binding;GO:0005524//ATP binding;GO:0005525//GTP binding;GO:0016787//hydrolase activity;GO:0017076//purine nucleotide binding;GO:0019001//guanyl nucleotide binding;GO:0019843//rRNA binding;GO:003254…	GO:0006400//tRNA modification;GO:0006412//translation;GO:0006605//protein targeting;GO:0006810//transport;GO:0006886//intracellular protein transport;GO:0008104//protein localization;GO:0008150//biological_process;GO:0015031//protein transport;GO:0015833//peptide transport;GO:0033036//macromolecule localization;GO:0033365//protein localization to organelle;GO:0034613//cellular protein localizatio…	--
Unigene0001079	1.726	1.738	1.946	1.22	0.71	0.911	--	XP_015059756.1 protein transport protein SFT2-like [Solanum pennellii]	-	-	-	-	-	-	-	--
Unigene0001081	2.746	1.86	2.25	0.618	0.501	0.078	--	-	-	-	-	-	-	GO:0004781//sulfate adenylyltransferase (ATP) activity	GO:0000103//sulfate assimilation	--
Unigene0001082	1.304	0.784	4.393	1.643	0.431	1.4	CBSDUF3	XP_006366607.1 PREDICTED: DUF21 domain-containing protein At2g14520-like [Solanum tuberosum]	-	-	-	-	-	-	-	--
Unigene0001083	3.437	0.851	1.302	0.735	0.596	0.184	SAUR71	PHT70964.1 hypothetical protein T459_26068 [Capsicum annuum]	Environmental Information Processing	Signal transduction	ko04075//Plant hormone signal transduction	K14488	-	-	GO:0009733//response to auxin	--
Unigene0001084	7.72	10.465	7.256	0	0.26	0.08	ANN4	XP_006347774.1 PREDICTED: annexin D4-like [Solanum tuberosum]	-	-	-	-	-	GO:0005509//calcium ion binding;GO:0005544//calcium-dependent phospholipid binding	-	--
Unigene0001085	29.253	25.893	31.419	5.391	4.215	7.746	ANN4	KAH0728389.1 hypothetical protein KY284_004254 [Solanum tuberosum]	-	-	-	-	GO:0005575//cellular_component;GO:0005911//cell-cell junction;GO:0009506//plasmodesma;GO:0030054//cell junction;GO:0055044//symplast	GO:0003674//molecular_function;GO:0003676//nucleic acid binding;GO:0003723//RNA binding;GO:0003729//mRNA binding;GO:0005488//binding;GO:0005509//calcium ion binding;GO:0005543//phospholipid binding;GO:0005544//calcium-dependent phospholipid binding;GO:0008289//lipid binding;GO:0043167//ion binding;GO:0043168//anion binding;GO:0043169//cation binding;GO:0046872//metal ion binding;GO:0097159//organ…	GO:0001101//response to acid chemical;GO:0006950//response to stress;GO:0006970//response to osmotic stress;GO:0008150//biological_process;GO:0009266//response to temperature stimulus;GO:0009408//response to heat;GO:0009409//response to cold;GO:0009414//response to water deprivation;GO:0009415//response to water;GO:0009628//response to abiotic stimulus;GO:0009651//response to salt stress;GO:00097…	--
Unigene0001086	0.898	0.889	1.638	1.92	3.978	2.57	--	-	-	-	-	-	-	-	-	--
Unigene0001087	11.187	6.289	9.694	14.192	4.831	11.35	CYP72A225	XP_019264606.1 PREDICTED: cytochrome P450 CYP72A219-like [Nicotiana attenuata]	-	-	-	-	-	GO:0005506//iron ion binding;GO:0016705//oxidoreductase activity, acting on paired donors, with incorporation or reduction of molecular oxygen;GO:0020037//heme binding	-	--
Unigene0001088	0	0.316	0	3.072	2.953	0	CYP72A1	PHT97624.1 Secologanin synthase [Capsicum chinense]	-	-	-	-	-	GO:0005506//iron ion binding;GO:0016705//oxidoreductase activity, acting on paired donors, with incorporation or reduction of molecular oxygen;GO:0020037//heme binding	-	--
Unigene0001089	4.18	5.656	7.076	12.857	11.755	12.214	--	KAH0673939.1 hypothetical protein KY284_025026 [Solanum tuberosum]	-	-	-	-	-	-	-	--
Unigene0001090	9.485	8.965	11.977	5.656	3.76	6.227	PYRR	XP_009586650.1 riboflavin biosynthesis protein PYRR, chloroplastic [Nicotiana tomentosiformis]	Metabolism;Metabolism;Metabolism	Global and overview maps;Global and overview maps;Metabolism of cofactors and vitamins	ko01100//Metabolic pathways;ko01110//Biosynthesis of secondary metabolites;ko00740//Riboflavin metabolism	K11752;K11752;K11752	GO:0005575//cellular_component;GO:0005622//intracellular anatomical structure;GO:0005737//cytoplasm;GO:0009507//chloroplast;GO:0009536//plastid;GO:0043226//organelle;GO:0043227//membrane-bounded organelle;GO:0043229//intracellular organelle;GO:0043231//intracellular membrane-bounded organelle	GO:0000166//nucleotide binding;GO:0003674//molecular_function;GO:0003824//catalytic activity;GO:0004159//dihydropyrimidine dehydrogenase (NAD+) activity;GO:0005488//binding;GO:0008270//zinc ion binding;GO:0008703//5-amino-6-(5-phosphoribosylamino)uracil reductase activity;GO:0008835//diaminohydroxyphosphoribosylaminopyrimidine deaminase activity;GO:0016491//oxidoreductase activity;GO:0016614//oxi…	GO:0006139//nucleobase-containing compound metabolic process;GO:0006725//cellular aromatic compound metabolic process;GO:0006753//nucleoside phosphate metabolic process;GO:0006766//vitamin metabolic process;GO:0006767//water-soluble vitamin metabolic process;GO:0006771//riboflavin metabolic process;GO:0006793//phosphorus metabolic process;GO:0006796//phosphate-containing compound metabolic proces…	--
Unigene0001092	3.642	2.689	3.735	12.247	10.333	9.384	FAF3	XP_016557311.1 PREDICTED: protein FANTASTIC FOUR 3-like [Capsicum annuum]	-	-	-	-	-	-	-	--
Unigene0001093	0.208	0.206	0	0.223	0	0	--	-	-	-	-	-	-	-	-	--
Unigene0001094	41.294	38.89	43.635	36.657	37.635	40.219	NUP98A	XP_019258854.1 PREDICTED: nuclear pore complex protein NUP98A isoform X1 [Nicotiana attenuata]	Genetic Information Processing	Translation	ko03013//Nucleocytoplasmic transport	K14297	GO:0005575//cellular_component;GO:0005622//intracellular anatomical structure;GO:0005634//nucleus;GO:0005635//nuclear envelope;GO:0005643//nuclear pore;GO:0005654//nucleoplasm;GO:0005737//cytoplasm;GO:0005829//cytosol;GO:0012505//endomembrane system;GO:0016020//membrane;GO:0016234//inclusion body;GO:0016604//nuclear body;GO:0031080//nuclear pore outer ring;GO:0031090//organelle membrane;GO:003196…	GO:0003674//molecular_function;GO:0003676//nucleic acid binding;GO:0003682//chromatin binding;GO:0003712//transcription coregulator activity;GO:0003713//transcription coactivator activity;GO:0003723//RNA binding;GO:0003729//mRNA binding;GO:0003824//catalytic activity;GO:0005048//signal sequence binding;GO:0005198//structural molecule activity;GO:0005215//transporter activity;GO:0005488//binding;G…	GO:0000972//transcription-dependent tethering of RNA polymerase II gene DNA at nuclear periphery;GO:0000973//posttranscriptional tethering of RNA polymerase II gene DNA at nuclear periphery;GO:0006139//nucleobase-containing compound metabolic process;GO:0006259//DNA metabolic process;GO:0006260//DNA replication;GO:0006403//RNA localization;GO:0006405//RNA export from nucleus;GO:0006406//mRNA expo…	--
Unigene0001095	1.289	0.355	0.663	0.689	0.248	1.076	--	-	-	-	-	-	-	-	-	--
Unigene0001096	0.329	0.163	1.108	0.527	0.76	0.706	--	KAG5606742.1 hypothetical protein H5410_028234 [Solanum commersonii]	-	-	-	-	GO:0005575//cellular_component;GO:0005622//intracellular anatomical structure;GO:0005737//cytoplasm;GO:0005739//mitochondrion;GO:0009507//chloroplast;GO:0009536//plastid;GO:0019028//viral capsid;GO:0043226//organelle;GO:0043227//membrane-bounded organelle;GO:0043229//intracellular organelle;GO:0043231//intracellular membrane-bounded organelle;GO:0055036//virion membrane	GO:0003674//molecular_function;GO:0003824//catalytic activity;GO:0004252//serine-type endopeptidase activity;GO:0004659//prenyltransferase activity;GO:0005488//binding;GO:0016740//transferase activity;GO:0016765//transferase activity, transferring alkyl or aryl (other than methyl) groups;GO:0043167//ion binding;GO:0043169//cation binding;GO:0046872//metal ion binding;GO:0050347//trans-octaprenylt…	GO:0000003//reproduction;GO:0003006//developmental process involved in reproduction;GO:0006629//lipid metabolic process;GO:0006720//isoprenoid metabolic process;GO:0006743//ubiquinone metabolic process;GO:0006744//ubiquinone biosynthetic process;GO:0007275//multicellular organism development;GO:0008150//biological_process;GO:0008152//metabolic process;GO:0008299//isoprenoid biosynthetic process;G…	--
Unigene0001097	0.565	0.479	0.272	0.345	0.559	0.433	--	-	-	-	-	-	-	-	-	--
Unigene0001098	0.208	0.206	0.175	0.222	0.481	0.893	--	-	-	-	-	-	-	-	-	--
Unigene0001099	157.436	167.692	156.737	69.246	65.79	74.944	TOC159	XP_015169888.1 PREDICTED: translocase of chloroplast 159, chloroplastic [Solanum tuberosum]	-	-	-	-	GO:0005575//cellular_component;GO:0005622//intracellular anatomical structure;GO:0005737//cytoplasm;GO:0005829//cytosol;GO:0009507//chloroplast;GO:0009526//plastid envelope;GO:0009527//plastid outer membrane;GO:0009536//plastid;GO:0009707//chloroplast outer membrane;GO:0009941//chloroplast envelope;GO:0016020//membrane;GO:0016021//integral component of membrane;GO:0019867//outer membrane;GO:00310…	GO:0000166//nucleotide binding;GO:0001882//nucleoside binding;GO:0001883//purine nucleoside binding;GO:0003674//molecular_function;GO:0003824//catalytic activity;GO:0003924//GTPase activity;GO:0004888//transmembrane signaling receptor activity;GO:0004930//G protein-coupled receptor activity;GO:0005488//binding;GO:0005515//protein binding;GO:0005525//GTP binding;GO:0016462//pyrophosphatase activit…	GO:0006605//protein targeting;GO:0006810//transport;GO:0006886//intracellular protein transport;GO:0007154//cell communication;GO:0007165//signal transduction;GO:0007186//G protein-coupled receptor signaling pathway;GO:0008104//protein localization;GO:0008150//biological_process;GO:0009987//cellular process;GO:0015031//protein transport;GO:0015833//peptide transport;GO:0017038//protein import;GO:…	--
Unigene0001100	0.434	0.215	0.548	0	0.251	0	--	KAF3631219.1 putative digalactosyldiacylglycerol synthase 2, chloroplastic-like [Capsicum annuum]	-	-	-	-	-	-	-	--
Unigene0001101	3.626	2.704	3.33	1.711	0.871	1.82	PCMP-E20	KAH0766438.1 hypothetical protein KY285_002309 [Solanum tuberosum]	-	-	-	-	GO:0005575//cellular_component;GO:0005622//intracellular anatomical structure;GO:0043226//organelle;GO:0043227//membrane-bounded organelle;GO:0043229//intracellular organelle;GO:0043231//intracellular membrane-bounded organelle	GO:0003674//molecular_function;GO:0003676//nucleic acid binding;GO:0003723//RNA binding;GO:0003824//catalytic activity;GO:0004518//nuclease activity;GO:0004519//endonuclease activity;GO:0005488//binding;GO:0008270//zinc ion binding;GO:0016787//hydrolase activity;GO:0016788//hydrolase activity, acting on ester bonds;GO:0097159//organic cyclic compound binding;GO:1901363//heterocyclic compound bind…	GO:0006139//nucleobase-containing compound metabolic process;GO:0006725//cellular aromatic compound metabolic process;GO:0006807//nitrogen compound metabolic process;GO:0008150//biological_process;GO:0008152//metabolic process;GO:0009451//RNA modification;GO:0009987//cellular process;GO:0016070//RNA metabolic process;GO:0034641//cellular nitrogen compound metabolic process;GO:0043170//macromolecu…	--
Unigene0001102	1.78	1.437	2.101	1.137	0.827	0.872	--	XP_015076309.1 zinc finger MYND domain-containing protein 15 isoform X1 [Solanum pennellii]	-	-	-	-	GO:0005575//cellular_component;GO:0005622//intracellular anatomical structure;GO:0005634//nucleus;GO:0005737//cytoplasm;GO:0043226//organelle;GO:0043227//membrane-bounded organelle;GO:0043229//intracellular organelle;GO:0043231//intracellular membrane-bounded organelle	GO:0003674//molecular_function;GO:0005488//binding;GO:0005515//protein binding;GO:0019899//enzyme binding;GO:0042826//histone deacetylase binding;GO:0043167//ion binding;GO:0043169//cation binding;GO:0046872//metal ion binding	GO:0000003//reproduction;GO:0003006//developmental process involved in reproduction;GO:0006139//nucleobase-containing compound metabolic process;GO:0006351//transcription, DNA-templated;GO:0006355//regulation of transcription, DNA-templated;GO:0006725//cellular aromatic compound metabolic process;GO:0006807//nitrogen compound metabolic process;GO:0007276//gamete generation;GO:0007281//germ cell d…	--
Unigene0001103	20.491	86.51	75.703	0.119	0.45	0.12	A3G2XYLT	CAA3024158.1 UDP-glycosyltransferase 79B6 [Olea europaea subsp. europaea] [Olea europaea]	Metabolism	Biosynthesis of other secondary metabolites	ko00942//Anthocyanin biosynthesis	K17193	GO:0005575//cellular_component;GO:0005622//intracellular anatomical structure;GO:0043226//organelle;GO:0043227//membrane-bounded organelle;GO:0043229//intracellular organelle;GO:0043231//intracellular membrane-bounded organelle	GO:0003674//molecular_function;GO:0003824//catalytic activity;GO:0008194//UDP-glycosyltransferase activity;GO:0016740//transferase activity;GO:0016757//glycosyltransferase activity;GO:0016758//hexosyltransferase activity;GO:0035251//UDP-glucosyltransferase activity;GO:0046527//glucosyltransferase activity;GO:0080043//quercetin 3-O-glucosyltransferase activity;GO:0080044//quercetin 7-O-glucosyltra…	GO:0005975//carbohydrate metabolic process;GO:0008150//biological_process;GO:0008152//metabolic process;GO:0030259//lipid glycosylation	--
Unigene0001104	35.806	41.15	40.142	17.893	14.757	16.132	MPK10	KAH0653878.1 hypothetical protein KY289_031556 [Solanum tuberosum]	-	-	-	-	GO:0005575//cellular_component;GO:0005622//intracellular anatomical structure;GO:0005634//nucleus;GO:0005737//cytoplasm;GO:0043226//organelle;GO:0043227//membrane-bounded organelle;GO:0043229//intracellular organelle;GO:0043231//intracellular membrane-bounded organelle	GO:0000166//nucleotide binding;GO:0003674//molecular_function;GO:0003824//catalytic activity;GO:0004672//protein kinase activity;GO:0004674//protein serine/threonine kinase activity;GO:0004707//MAP kinase activity;GO:0005488//binding;GO:0005524//ATP binding;GO:0016301//kinase activity;GO:0016740//transferase activity;GO:0016772//transferase activity, transferring phosphorus-containing groups;GO:0…	GO:0000165//MAPK cascade;GO:0006464//cellular protein modification process;GO:0006468//protein phosphorylation;GO:0006793//phosphorus metabolic process;GO:0006796//phosphate-containing compound metabolic process;GO:0006807//nitrogen compound metabolic process;GO:0007154//cell communication;GO:0007165//signal transduction;GO:0008150//biological_process;GO:0008152//metabolic process;GO:0009987//cel…	--
Unigene0001105	15.742	12.941	14.31	3.828	3.367	2.697	At1g34470	XP_015058850.1 probable magnesium transporter NIPA6 isoform X2 [Solanum pennellii]	-	-	-	-	GO:0016020//membrane;GO:0016021//integral component of membrane	GO:0015095//magnesium ion transmembrane transporter activity	GO:0015693//magnesium ion transport	--
Unigene0001106	0.848	1.068	1.622	0.412	1.425	1.572	--	XP_009757738.1 PREDICTED: uncharacterized protein LOC104210521 isoform X3 [Nicotiana sylvestris]	-	-	-	-	GO:0008250//oligosaccharyltransferase complex;GO:0016021//integral component of membrane	-	-	--
Unigene0001107	17.353	15.572	16.297	5.825	3.948	5.094	AAE2	KAH0688487.1 hypothetical protein KY284_019040 [Solanum tuberosum]	-	-	-	-	-	GO:0003987//acetate-CoA ligase activity;GO:0004043//L-aminoadipate-semialdehyde dehydrogenase activity;GO:0008668//(2,3-dihydroxybenzoyl)adenylate synthase activity;GO:0008756//o-succinylbenzoate-CoA ligase activity;GO:0030729//acetoacetate-CoA ligase activity;GO:0047473//D-alanine [D-alanyl carrier protein] ligase activity;GO:0050218//propionate-CoA ligase activity	GO:0009234//menaquinone biosynthetic process;GO:0019287//isopentenyl diphosphate biosynthetic process, mevalonate pathway;GO:0019290//siderophore biosynthetic process;GO:0019350//teichoic acid biosynthetic process;GO:0019427//acetyl-CoA biosynthetic process from acetate;GO:0019878//lysine biosynthetic process via aminoadipic acid	--
Unigene0001108	0	0.054	0.183	0.813	1.004	1.283	--	-	-	-	-	-	-	-	-	--
Unigene0001109	13.348	16.828	15.964	9.863	7.502	8.378	rlmI	XP_016581583.1 PREDICTED: ribosomal RNA large subunit methyltransferase I isoform X3 [Capsicum annuum]	-	-	-	-	GO:0005575//cellular_component;GO:0005622//intracellular anatomical structure;GO:0005737//cytoplasm	GO:0003674//molecular_function;GO:0003676//nucleic acid binding;GO:0003723//RNA binding;GO:0003824//catalytic activity;GO:0005488//binding;GO:0008168//methyltransferase activity;GO:0008173//RNA methyltransferase activity;GO:0008276//protein methyltransferase activity;GO:0008649//rRNA methyltransferase activity;GO:0008757//S-adenosylmethionine-dependent methyltransferase activity;GO:0016740//trans…	GO:0000154//rRNA modification;GO:0001510//RNA methylation;GO:0006139//nucleobase-containing compound metabolic process;GO:0006364//rRNA processing;GO:0006396//RNA processing;GO:0006412//translation;GO:0006464//cellular protein modification process;GO:0006725//cellular aromatic compound metabolic process;GO:0006807//nitrogen compound metabolic process;GO:0008150//biological_process;GO:0008152//met…	--
Unigene0001110	1.332	1.7	1.221	1.012	1.129	0.89	--	KAF3630211.1 hypothetical protein FXO37_28558 [Capsicum annuum]	-	-	-	-	-	-	-	--
Unigene0001111	0.481	0	0	0.171	0	0.172	--	-	-	-	-	-	-	-	-	--
Unigene0001112	0	0	0	0.59	0.638	0.79	--	-	-	-	-	-	-	-	-	--
Unigene0001113	1.286	0.318	0.609	0.344	0.836	0.259	RE1	XP_009767591.1 PREDICTED: uncharacterized protein LOC104218727 [Nicotiana sylvestris]	-	-	-	-	GO:0005575//cellular_component;GO:0005622//intracellular anatomical structure;GO:0005737//cytoplasm;GO:0005739//mitochondrion;GO:0043226//organelle;GO:0043227//membrane-bounded organelle;GO:0043229//intracellular organelle;GO:0043231//intracellular membrane-bounded organelle	-	GO:0015074//DNA integration	--
Unigene0001114	0.443	0	0	0.473	0	0	AtMg00810	XP_016506772.1 PREDICTED: uncharacterized mitochondrial protein AtMg00810-like [Nicotiana tabacum]	-	-	-	-	-	-	GO:0048544//recognition of pollen	--
Unigene0001115	0.246	0	0.413	0	0	0	RE1	XP_019246487.1 PREDICTED: uncharacterized protein LOC109226143 [Nicotiana attenuata]	-	-	-	-	-	-	-	--
Unigene0001117	0	0	0.528	0	0	0	--	-	-	-	-	-	-	-	-	--
Unigene0001119	62.867	54.938	51.727	5.971	5.69	3.151	PSAEB	AEC11063.1 photosystem I reaction center subunit iv b, partial [Camellia sinensis]	Metabolism;Metabolism	Global and overview maps;Energy metabolism	ko01100//Metabolic pathways;ko00195//Photosynthesis	K02693;K02693	GO:0009522//photosystem I;GO:0009538//photosystem I reaction center	-	GO:0015979//photosynthesis	--
Unigene0001120	41.078	43.823	29.331	7.449	4.521	1.444	PSAEA	XP_004247116.1 photosystem I reaction center subunit IV B, chloroplastic [Solanum lycopersicum]	Metabolism;Metabolism	Global and overview maps;Energy metabolism	ko01100//Metabolic pathways;ko00195//Photosynthesis	K02693;K02693	GO:0005575//cellular_component;GO:0005622//intracellular anatomical structure;GO:0005737//cytoplasm;GO:0009507//chloroplast;GO:0009521//photosystem;GO:0009522//photosystem I;GO:0009534//chloroplast thylakoid;GO:0009535//chloroplast thylakoid membrane;GO:0009536//plastid;GO:0009538//photosystem I reaction center;GO:0009579//thylakoid;GO:0016020//membrane;GO:0031976//plastid thylakoid;GO:0031984//o…	-	GO:0008150//biological_process;GO:0008152//metabolic process;GO:0009987//cellular process;GO:0015979//photosynthesis;GO:0044237//cellular metabolic process	--
Unigene0001121	2.353	3.813	3.782	1.83	3.709	2.067	--	KAH0731666.1 hypothetical protein KY289_002854 [Solanum tuberosum]	-	-	-	-	-	-	-	--
Unigene0001122	1.815	2.04	1.404	14.314	10.601	10.11	AHL15	TMW94898.1 hypothetical protein EJD97_009639 [Solanum chilense]	-	-	-	-	GO:0005575//cellular_component;GO:0005622//intracellular anatomical structure;GO:0005634//nucleus;GO:0043226//organelle;GO:0043227//membrane-bounded organelle;GO:0043229//intracellular organelle;GO:0043231//intracellular membrane-bounded organelle	GO:0003674//molecular_function;GO:0003676//nucleic acid binding;GO:0003677//DNA binding;GO:0003680//minor groove of adenine-thymine-rich DNA binding;GO:0003690//double-stranded DNA binding;GO:0003700//DNA-binding transcription factor activity;GO:0005488//binding;GO:0043565//sequence-specific DNA binding;GO:0097159//organic cyclic compound binding;GO:0140110//transcription regulator activity;GO:19…	GO:0002376//immune system process;GO:0002682//regulation of immune system process;GO:0002683//negative regulation of immune system process;GO:0006139//nucleobase-containing compound metabolic process;GO:0006351//transcription, DNA-templated;GO:0006355//regulation of transcription, DNA-templated;GO:0006725//cellular aromatic compound metabolic process;GO:0006807//nitrogen compound metabolic proces…	--
Unigene0001123	0	0	0	0.702	0.379	0.529	--	KAG5628595.1 hypothetical protein H5410_000312 [Solanum commersonii]	-	-	-	-	GO:0005575//cellular_component;GO:0005622//intracellular anatomical structure;GO:0005634//nucleus;GO:0005737//cytoplasm;GO:0016020//membrane;GO:0016021//integral component of membrane;GO:0031224//intrinsic component of membrane;GO:0043226//organelle;GO:0043227//membrane-bounded organelle;GO:0043229//intracellular organelle;GO:0043231//intracellular membrane-bounded organelle	GO:0003674//molecular_function;GO:0003676//nucleic acid binding;GO:0003677//DNA binding;GO:0003700//DNA-binding transcription factor activity;GO:0005488//binding;GO:0097159//organic cyclic compound binding;GO:0140110//transcription regulator activity;GO:1901363//heterocyclic compound binding	GO:0006139//nucleobase-containing compound metabolic process;GO:0006351//transcription, DNA-templated;GO:0006355//regulation of transcription, DNA-templated;GO:0006725//cellular aromatic compound metabolic process;GO:0006807//nitrogen compound metabolic process;GO:0008150//biological_process;GO:0008152//metabolic process;GO:0009058//biosynthetic process;GO:0009059//macromolecule biosynthetic proc…	--
Unigene0001124	16.685	12.214	13.416	27.714	35.895	26.665	--	XP_006347711.1 PREDICTED: uncharacterized protein LOC102599911 isoform X2 [Solanum tuberosum]	Genetic Information Processing	Translation	ko03015//mRNA surveillance pathway	K14404	-	-	-	--
Unigene0001125	17.209	20.001	16.121	33.05	32.683	36.436	Sec24a	XP_019227333.1 PREDICTED: protein transport protein SEC24 [Nicotiana attenuata]	-	-	-	-	GO:0000139//Golgi membrane;GO:0005575//cellular_component;GO:0005622//intracellular anatomical structure;GO:0005737//cytoplasm;GO:0005783//endoplasmic reticulum;GO:0005789//endoplasmic reticulum membrane;GO:0005794//Golgi apparatus;GO:0005798//Golgi-associated vesicle;GO:0012505//endomembrane system;GO:0012506//vesicle membrane;GO:0012507//ER to Golgi transport vesicle membrane;GO:0016020//membra…	GO:0003674//molecular_function;GO:0005048//signal sequence binding;GO:0005488//binding;GO:0008270//zinc ion binding;GO:0033218//amide binding;GO:0042277//peptide binding;GO:0043167//ion binding;GO:0043169//cation binding;GO:0046872//metal ion binding;GO:0046914//transition metal ion binding	GO:0006810//transport;GO:0006886//intracellular protein transport;GO:0006888//endoplasmic reticulum to Golgi vesicle-mediated transport;GO:0006900//vesicle budding from membrane;GO:0006914//autophagy;GO:0006996//organelle organization;GO:0008104//protein localization;GO:0008150//biological_process;GO:0008152//metabolic process;GO:0009056//catabolic process;GO:0009987//cellular process;GO:0015031/…	--
Unigene0001126	0.14	0.138	1.058	0.896	0.646	0.45	--	KAH0723937.1 hypothetical protein KY289_006981 [Solanum tuberosum]	-	-	-	-	-	-	GO:0019083//viral transcription	--
Unigene0001127	8.18	7.494	6.629	13.513	18.656	14.98	RH57	XP_016542668.1 PREDICTED: DEAD-box ATP-dependent RNA helicase 57 isoform X1 [Capsicum annuum]	-	-	-	-	GO:0005575//cellular_component;GO:0005622//intracellular anatomical structure;GO:0005634//nucleus;GO:0005658//alpha DNA polymerase:primase complex;GO:0005730//nucleolus;GO:0005737//cytoplasm;GO:0009380//excinuclease repair complex;GO:0031974//membrane-enclosed lumen;GO:0031981//nuclear lumen;GO:0043226//organelle;GO:0043227//membrane-bounded organelle;GO:0043228//non-membrane-bounded organelle;GO…	GO:0000166//nucleotide binding;GO:0003674//molecular_function;GO:0003676//nucleic acid binding;GO:0003677//DNA binding;GO:0003678//DNA helicase activity;GO:0003688//DNA replication origin binding;GO:0003690//double-stranded DNA binding;GO:0003723//RNA binding;GO:0003724//RNA helicase activity;GO:0003824//catalytic activity;GO:0003916//DNA topoisomerase activity;GO:0003917//DNA topoisomerase type …	GO:0006139//nucleobase-containing compound metabolic process;GO:0006260//DNA replication;GO:0006265//DNA topological change;GO:0006268//DNA unwinding involved in DNA replication;GO:0006281//DNA repair;GO:0006289//nucleotide-excision repair;GO:0006310//DNA recombination;GO:0006364//rRNA processing;GO:0006396//RNA processing;GO:0006725//cellular aromatic compound metabolic process;GO:0006807//nitro…	--
Unigene0001128	1.786	3.05	0.519	1.844	1.139	1.851	MIZ1	KAG5607354.1 hypothetical protein H5410_028846 [Solanum commersonii]	-	-	-	-	-	-	GO:0010274//hydrotropism	--
Unigene0001129	3.894	3.324	5.256	5.741	9.311	9.297	RSS3	XP_016547261.1 PREDICTED: uncharacterized protein LOC107847495 [Capsicum annuum]	-	-	-	-	-	-	-	--
Unigene0001131	15.026	16.66	18.529	39.023	37.79	35.782	--	XP_015057032.1 selenoprotein K [Solanum pennellii]	-	-	-	-	-	-	-	--
Unigene0001133	2.232	4.419	4.782	0	0	0	--	-	-	-	-	-	-	-	-	--
Unigene0001134	0.496	0.328	0.139	0.354	0	0.178	--	-	-	-	-	-	-	-	-	--
Unigene0001135	0	0.521	0	0	0.912	0.847	--	-	-	-	-	-	-	-	-	--
Unigene0001137	0.144	0.285	0.121	1.537	0.499	0.309	--	-	-	-	-	-	-	-	-	--
Unigene0001138	0	0.684	0	0	0.798	0	--	-	-	-	-	-	-	-	-	--
Unigene0001139	0.08	0.159	0.473	0.515	0.835	0.345	--	-	-	-	-	-	-	-	-	--
Unigene0001141	0	0	0	0.274	0	0.825	--	-	-	-	-	-	-	-	-	--
Unigene0001142	1.064	0	0.512	0.325	0	0.163	--	-	-	-	-	-	-	-	-	--
Unigene0001143	13.503	13.047	15.047	9.498	8.24	10.087	FLACCA	XP_015065987.1 uncharacterized protein LOC107011134 [Solanum pennellii]	-	-	-	-	-	GO:0031071//cysteine desulfurase activity	GO:0016226//iron-sulfur cluster assembly	--
Unigene0001144	0	0	0	10.631	14.035	10.114	ERF095	XP_015068552.1 ethylene-responsive transcription factor ERF096-like [Solanum pennellii]	-	-	-	-	-	GO:0003700//DNA-binding transcription factor activity	GO:0006355//regulation of transcription, DNA-templated	ERF
Unigene0001145	2.835	4.343	3.062	0.858	0	0.402	At3g53190	OIT04173.1 putative pectate lyase 12 [Nicotiana attenuata]	Metabolism;Metabolism	Global and overview maps;Carbohydrate metabolism	ko01100//Metabolic pathways;ko00040//Pentose and glucuronate interconversions	K01728;K01728	-	-	GO:0071941//nitrogen cycle metabolic process	--
Unigene0001147	0	0	0	0.292	0	0	--	-	-	-	-	-	-	-	-	--
Unigene0001149	0.554	0.411	0.466	0	0.16	0.149	--	-	-	-	-	-	-	GO:0003723//RNA binding;GO:0003968//RNA-directed 5'-3' RNA polymerase activity;GO:0005524//ATP binding	GO:0019079//viral genome replication	--
Unigene0001150	0	0	0.248	0	0	0	--	-	-	-	-	-	-	-	-	--
Unigene0001151	0.94	0.677	1.222	0.274	0	0.367	--	-	-	-	-	-	-	-	-	--
Unigene0001152	1.198	0.553	0.807	0.427	0.738	0.514	--	XP_009801876.1 PREDICTED: uncharacterized protein LOC104247534 [Nicotiana sylvestris]	-	-	-	-	-	-	-	--
Unigene0001153	0	0.081	0.069	1.579	4.363	1.674	--	-	-	-	-	-	-	-	-	--
Unigene0001154	30.69	29.108	32.12	32.102	26.841	29.348	Prep	XP_009628579.1 prolyl endopeptidase-like [Nicotiana tomentosiformis]	-	-	-	-	-	GO:0004252//serine-type endopeptidase activity;GO:0008236//serine-type peptidase activity	GO:0006508//proteolysis	--
Unigene0001155	1.97	3.308	3.822	4.578	4.851	3.77	--	XP_016547609.1 PREDICTED: uncharacterized protein LOC107847705 isoform X1 [Capsicum annuum]	-	-	-	-	-	-	GO:0006457//protein folding	--
Unigene0001156	0	0	0	0.294	1.904	0	--	-	-	-	-	-	-	-	-	--
Unigene0001158	0.571	0	0	0.61	0.66	1.022	--	-	-	-	-	-	-	-	-	--
Unigene0001159	0.127	0.502	2.239	0.271	0	0.136	--	XP_016514716.1 PREDICTED: uncharacterized protein LOC107831463 [Nicotiana tabacum]	-	-	-	-	-	-	-	--
Unigene0001160	7.022	6.296	6.941	11.876	12.719	12.639	AGD7	XP_004249530.1 probable ADP-ribosylation factor GTPase-activating protein AGD6 [Solanum lycopersicum]	Cellular Processes	Transport and catabolism	ko04144//Endocytosis	K12492	GO:0005634//nucleus	GO:0003677//DNA binding;GO:0004879//nuclear receptor activity;GO:0005096//GTPase activator activity;GO:0005496//steroid binding	GO:0006355//regulation of transcription, DNA-templated;GO:0030521//androgen receptor signaling pathway	--
Unigene0001161	0.171	0.17	0	0	0	0	--	-	-	-	-	-	-	-	-	--
Unigene0001162	0.261	1.294	1.76	1.21	0	0	--	-	-	-	-	-	-	-	-	--
Unigene0001163	0	0	0.277	0	0	0	--	-	-	-	-	-	-	-	-	--
Unigene0001164	0	0	0	0.389	0	0	--	-	-	-	-	-	-	-	-	--
Unigene0001165	0	0	0	0	0.657	0.203	--	TMX03178.1 hypothetical protein EJD97_017848 [Solanum chilense]	-	-	-	-	-	-	-	--
Unigene0001166	7.983	7.665	9.041	10.86	12.86	14.801	--	XP_015064956.1 putative protease Do-like 14 isoform X1 [Solanum pennellii]	-	-	-	-	GO:0030288//outer membrane-bounded periplasmic space	GO:0003723//RNA binding;GO:0004222//metalloendopeptidase activity;GO:0004252//serine-type endopeptidase activity;GO:0005515//protein binding;GO:0008236//serine-type peptidase activity;GO:0045152//antisigma factor binding	GO:0006355//regulation of transcription, DNA-templated;GO:0006508//proteolysis;GO:0006950//response to stress;GO:0030436//asexual sporulation	--
Unigene0001169	0	0	0.281	0	0	0.358	--	-	-	-	-	-	-	-	-	--
Unigene0001170	0	0	0.792	0	0	0	--	-	-	-	-	-	-	-	-	--
Unigene0001171	0	0.898	0	0	0.262	0	--	XP_019261683.1 PREDICTED: uncharacterized protein LOC109239559 [Nicotiana attenuata]	-	-	-	-	-	-	-	--
Unigene0001173	1.551	2.048	1.931	0.138	0.672	0.59	XA21	KAH0642781.1 hypothetical protein KY289_033755 [Solanum tuberosum]	-	-	-	-	-	GO:0004672//protein kinase activity;GO:0005515//protein binding;GO:0005524//ATP binding	GO:0006468//protein phosphorylation	--
Unigene0001175	1.096	0.789	0.922	0	0.46	0.321	--	XP_033512697.1 probable LRR receptor-like serine/threonine-protein kinase At1g34110 [Nicotiana tomentosiformis]	-	-	-	-	-	GO:0004672//protein kinase activity;GO:0005515//protein binding;GO:0005524//ATP binding	GO:0006468//protein phosphorylation	--
Unigene0001177	1.022	0.506	0.323	0.546	0.295	1.371	PCMP-E91	XP_009628923.1 pentatricopeptide repeat-containing protein At3g16610 [Nicotiana tomentosiformis]	-	-	-	-	GO:0005575//cellular_component;GO:0005622//intracellular anatomical structure;GO:0043226//organelle;GO:0043227//membrane-bounded organelle;GO:0043229//intracellular organelle;GO:0043231//intracellular membrane-bounded organelle	GO:0003674//molecular_function;GO:0003676//nucleic acid binding;GO:0003723//RNA binding;GO:0003824//catalytic activity;GO:0004518//nuclease activity;GO:0004519//endonuclease activity;GO:0005488//binding;GO:0008270//zinc ion binding;GO:0016787//hydrolase activity;GO:0016788//hydrolase activity, acting on ester bonds;GO:0097159//organic cyclic compound binding;GO:1901363//heterocyclic compound bind…	GO:0006139//nucleobase-containing compound metabolic process;GO:0006725//cellular aromatic compound metabolic process;GO:0006807//nitrogen compound metabolic process;GO:0008150//biological_process;GO:0008152//metabolic process;GO:0009451//RNA modification;GO:0009987//cellular process;GO:0016070//RNA metabolic process;GO:0034641//cellular nitrogen compound metabolic process;GO:0043170//macromolecu…	--
Unigene0001178	0	0	0	0	1.088	0	PCMP-E91	XP_019262194.1 PREDICTED: pentatricopeptide repeat-containing protein At3g16610 [Nicotiana attenuata]	-	-	-	-	GO:0005575//cellular_component;GO:0005622//intracellular anatomical structure;GO:0043226//organelle;GO:0043227//membrane-bounded organelle;GO:0043229//intracellular organelle;GO:0043231//intracellular membrane-bounded organelle	GO:0003674//molecular_function;GO:0003676//nucleic acid binding;GO:0003723//RNA binding;GO:0003824//catalytic activity;GO:0004518//nuclease activity;GO:0004519//endonuclease activity;GO:0005488//binding;GO:0008270//zinc ion binding;GO:0016787//hydrolase activity;GO:0016788//hydrolase activity, acting on ester bonds;GO:0097159//organic cyclic compound binding;GO:1901363//heterocyclic compound bind…	GO:0006139//nucleobase-containing compound metabolic process;GO:0006725//cellular aromatic compound metabolic process;GO:0006807//nitrogen compound metabolic process;GO:0008150//biological_process;GO:0008152//metabolic process;GO:0009451//RNA modification;GO:0009987//cellular process;GO:0016070//RNA metabolic process;GO:0034641//cellular nitrogen compound metabolic process;GO:0043170//macromolecu…	--
Unigene0001180	0.415	1.028	0.35	0.444	0.96	0.334	PCMP-E91	TMW84813.1 hypothetical protein EJD97_024319 [Solanum chilense]	-	-	-	-	GO:0005575//cellular_component;GO:0005622//intracellular anatomical structure;GO:0005739//mitochondrion;GO:0043226//organelle;GO:0043227//membrane-bounded organelle;GO:0043229//intracellular organelle;GO:0043231//intracellular membrane-bounded organelle	GO:0003674//molecular_function;GO:0003676//nucleic acid binding;GO:0003723//RNA binding;GO:0003824//catalytic activity;GO:0004518//nuclease activity;GO:0004519//endonuclease activity;GO:0005488//binding;GO:0008270//zinc ion binding;GO:0016787//hydrolase activity;GO:0016788//hydrolase activity, acting on ester bonds;GO:0097159//organic cyclic compound binding;GO:1901363//heterocyclic compound bind…	GO:0006139//nucleobase-containing compound metabolic process;GO:0006725//cellular aromatic compound metabolic process;GO:0006807//nitrogen compound metabolic process;GO:0008150//biological_process;GO:0008152//metabolic process;GO:0009451//RNA modification;GO:0009987//cellular process;GO:0016070//RNA metabolic process;GO:0034641//cellular nitrogen compound metabolic process;GO:0043170//macromolecu…	--
Unigene0001181	2.368	6.197	0.641	0.52	0	0.023	At1g29670	XP_016454123.1 PREDICTED: GDSL esterase/lipase At1g29670-like [Nicotiana tabacum]	-	-	-	-	GO:0000315//organellar large ribosomal subunit;GO:0022625//cytosolic large ribosomal subunit	GO:0003735//structural constituent of ribosome;GO:0016788//hydrolase activity, acting on ester bonds	GO:0006412//translation	--
Unigene0001182	3.573	3.788	6.148	15.073	17.612	18.09	--	KAH0771065.1 hypothetical protein KY290_015046 [Solanum tuberosum]	-	-	-	-	-	-	-	--
Unigene0001183	0.216	0.321	0.227	0.692	1.872	1.796	--	KAF3645368.1 putative mannan endo-1,4-beta-mannosidase 7-like [Capsicum annuum]	-	-	-	-	-	GO:0000772//mating pheromone activity	GO:0000750//pheromone-dependent signal transduction involved in conjugation with cellular fusion	--
Unigene0001184	1.432	0.911	1.119	1.312	0.827	0.988	--	KAH0738913.1 hypothetical protein KY290_037618 [Solanum tuberosum]	-	-	-	-	GO:0005739//mitochondrion	-	GO:0033617//mitochondrial cytochrome c oxidase assembly	--
Unigene0001185	7.492	8.346	10.347	10.386	11.094	6.283	--	XP_009779621.1 PREDICTED: uncharacterized protein LOC104228781 isoform X2 [Nicotiana sylvestris]	-	-	-	-	-	-	-	--
Unigene0001186	0.884	0	0	0	0	0	--	-	-	-	-	-	-	-	-	--
Unigene0001187	0	0	0	0.388	0	0.195	--	-	-	-	-	-	-	GO:0004525//ribonuclease III activity	GO:0006396//RNA processing	--
Unigene0001188	0.173	1.886	0	0.74	0.2	0.558	--	-	-	-	-	-	-	-	-	--
Unigene0001189	1.508	0.498	0.846	0.179	2.905	0.899	--	-	-	-	-	-	-	-	-	--
Unigene0001190	84.776	62.381	69.075	27.712	20.075	22.264	--	KAG5627313.1 hypothetical protein H5410_012531 [Solanum commersonii]	-	-	-	-	-	GO:0005509//calcium ion binding	-	--
Unigene0001191	2.324	1.593	1.656	1.338	2.48	0.768	--	PHT60145.1 hypothetical protein CQW23_02508 [Capsicum baccatum]	-	-	-	-	-	GO:0005509//calcium ion binding	-	--
Unigene0001192	1.296	1.532	1.232	2.771	1.595	1.84	CHI	ATB56303.1 chalcone isomerase, partial [Lycium ruthenicum]	Metabolism;Metabolism;Metabolism	Global and overview maps;Global and overview maps;Biosynthesis of other secondary metabolites	ko01100//Metabolic pathways;ko01110//Biosynthesis of secondary metabolites;ko00941//Flavonoid biosynthesis	K01859;K01859;K01859	-	GO:0016872//intramolecular lyase activity	-	--
Unigene0001193	0.125	0.371	0.807	0.623	1.926	0.268	MED33B	XP_009787260.1 PREDICTED: mediator of RNA polymerase II transcription subunit 33A-like [Nicotiana sylvestris]	-	-	-	-	-	-	-	--
Unigene0001194	0	0	0	0	1.216	0	--	-	-	-	-	-	-	-	-	--
Unigene0001195	0.721	0.238	0.135	0.428	0.74	1.461	FMO1	XP_016454991.1 PREDICTED: probable flavin-containing monooxygenase 1 [Nicotiana tabacum]	Metabolism	Metabolism of other amino acids	ko00430//Taurine and hypotaurine metabolism	K00485	-	GO:0000166//nucleotide binding;GO:0003674//molecular_function;GO:0003824//catalytic activity;GO:0004355//glutamate synthase (NADPH) activity;GO:0004497//monooxygenase activity;GO:0004499//N,N-dimethylaniline monooxygenase activity;GO:0004729//oxygen-dependent protoporphyrinogen oxidase activity;GO:0004791//thioredoxin-disulfide reductase activity;GO:0005488//binding;GO:0016166//phytoene dehydroge…	GO:0001666//response to hypoxia;GO:0002218//activation of innate immune response;GO:0002253//activation of immune response;GO:0002376//immune system process;GO:0002682//regulation of immune system process;GO:0002684//positive regulation of immune system process;GO:0006537//glutamate biosynthetic process;GO:0006779//porphyrin-containing compound biosynthetic process;GO:0006950//response to stress;…	--
Unigene0001196	40.03	35.415	26.146	1.032	1.116	0.648	FMO1	XP_009796934.1 PREDICTED: probable flavin-containing monooxygenase 1 [Nicotiana sylvestris]	Metabolism	Metabolism of other amino acids	ko00430//Taurine and hypotaurine metabolism	K00485	GO:0019867//outer membrane	GO:0003824//catalytic activity;GO:0004355//glutamate synthase (NADPH) activity;GO:0004499//N,N-dimethylaniline monooxygenase activity;GO:0004729//oxygen-dependent protoporphyrinogen oxidase activity;GO:0015036//disulfide oxidoreductase activity;GO:0016166//phytoene dehydrogenase activity;GO:0016491//oxidoreductase activity;GO:0050660//flavin adenine dinucleotide binding;GO:0050661//NADP binding	GO:0006537//glutamate biosynthetic process;GO:0006779//porphyrin-containing compound biosynthetic process;GO:0006790//sulfur compound metabolic process;GO:0009228//thiamine biosynthetic process;GO:0009297//pilus assembly;GO:0009306//protein secretion;GO:0016117//carotenoid biosynthetic process	--
Unigene0001197	1.095	2.405	1.002	0.814	0.275	0.46	FMO1	XP_009796934.1 PREDICTED: probable flavin-containing monooxygenase 1 [Nicotiana sylvestris]	Metabolism	Metabolism of other amino acids	ko00430//Taurine and hypotaurine metabolism	K00485	GO:0009342//glutamate synthase complex (NADPH)	GO:0003824//catalytic activity;GO:0004355//glutamate synthase (NADPH) activity;GO:0004499//N,N-dimethylaniline monooxygenase activity;GO:0004729//oxygen-dependent protoporphyrinogen oxidase activity;GO:0016166//phytoene dehydrogenase activity;GO:0016491//oxidoreductase activity;GO:0045181//glutamate synthase activity, NAD(P)H as acceptor;GO:0050660//flavin adenine dinucleotide binding;GO:0050661/…	GO:0006537//glutamate biosynthetic process;GO:0006779//porphyrin-containing compound biosynthetic process;GO:0009228//thiamine biosynthetic process;GO:0016117//carotenoid biosynthetic process	--
Unigene0001198	0	0	0	0	0.922	0	--	-	-	-	-	-	-	-	-	--
Unigene0001199	4.636	5.697	5.126	2.567	3.486	3.658	Cenpv	XP_006352438.1 PREDICTED: centromere protein V [Solanum tuberosum]	-	-	-	-	GO:0000775//chromosome, centromeric region;GO:0000776//kinetochore;GO:0000779//condensed chromosome, centromeric region;GO:0000793//condensed chromosome;GO:0005575//cellular_component;GO:0005622//intracellular anatomical structure;GO:0005634//nucleus;GO:0005694//chromosome;GO:0005737//cytoplasm;GO:0005819//spindle;GO:0005856//cytoskeleton;GO:0015630//microtubule cytoskeleton;GO:0032991//protein-c…	GO:0003674//molecular_function;GO:0003824//catalytic activity;GO:0016829//lyase activity;GO:0016846//carbon-sulfur lyase activity	GO:0001667//ameboidal-type cell migration;GO:0006323//DNA packaging;GO:0006325//chromatin organization;GO:0006333//chromatin assembly or disassembly;GO:0006338//chromatin remodeling;GO:0006928//movement of cell or subcellular component;GO:0006996//organelle organization;GO:0007049//cell cycle;GO:0008150//biological_process;GO:0008152//metabolic process;GO:0009987//cellular process;GO:0010564//reg…	--
Unigene0001200	1.356	1.88	0.685	1.45	0.94	0	--	-	-	-	-	-	-	-	-	--
Unigene0001202	0.167	1.239	1.123	0.713	0.193	0.09	--	XP_019232503.1 PREDICTED: uncharacterized protein LOC109213197 [Nicotiana attenuata]	-	-	-	-	-	-	-	--
Unigene0001204	0.135	0.402	0.683	0.145	0	0	--	-	-	-	-	-	-	-	-	--
Unigene0001205	1.367	0	0	0	0	0	--	KAG5628307.1 hypothetical protein H5410_000024 [Solanum commersonii]	-	-	-	-	-	-	-	--
Unigene0001208	0.677	0	0.142	1.266	0	0.182	CAT1	XP_044511383.1 catalase isozyme 1-like [Mangifera indica]	Metabolism;Metabolism;Metabolism;Environmental Information Processing;Metabolism;Cellular Processes;Metabolism	Global and overview maps;Global and overview maps;Global and overview maps;Signal transduction;Carbohydrate metabolism;Transport and catabolism;Amino acid metabolism	ko01100//Metabolic pathways;ko01110//Biosynthesis of secondary metabolites;ko01200//Carbon metabolism;ko04016//MAPK signaling pathway - plant;ko00630//Glyoxylate and dicarboxylate metabolism;ko04146//Peroxisome;ko00380//Tryptophan metabolism	K03781;K03781;K03781;K03781;K03781;K03781;K03781	GO:0005575//cellular_component;GO:0005576//extracellular region;GO:0005618//cell wall;GO:0005622//intracellular anatomical structure;GO:0005737//cytoplasm;GO:0005739//mitochondrion;GO:0005773//vacuole;GO:0005777//peroxisome;GO:0005829//cytosol;GO:0005840//ribosome;GO:0005886//plasma membrane;GO:0005911//cell-cell junction;GO:0009506//plasmodesma;GO:0009507//chloroplast;GO:0009514//glyoxysome;GO:0…	GO:0003674//molecular_function;GO:0003676//nucleic acid binding;GO:0003723//RNA binding;GO:0003729//mRNA binding;GO:0003824//catalytic activity;GO:0004096//catalase activity;GO:0004601//peroxidase activity;GO:0005488//binding;GO:0016209//antioxidant activity;GO:0016491//oxidoreductase activity;GO:0016684//oxidoreductase activity, acting on peroxide as acceptor;GO:0020037//heme binding;GO:0043167/…	GO:0000302//response to reactive oxygen species;GO:0006950//response to stress;GO:0006979//response to oxidative stress;GO:0006995//cellular response to nitrogen starvation;GO:0007154//cell communication;GO:0008150//biological_process;GO:0008152//metabolic process;GO:0009056//catabolic process;GO:0009266//response to temperature stimulus;GO:0009267//cellular response to starvation;GO:0009314//res…	--
Unigene0001209	0	0	1.003	0	0	0	CAT4	XP_044511383.1 catalase isozyme 1-like [Mangifera indica]	Metabolism;Metabolism;Metabolism;Environmental Information Processing;Metabolism;Cellular Processes;Metabolism	Global and overview maps;Global and overview maps;Global and overview maps;Signal transduction;Carbohydrate metabolism;Transport and catabolism;Amino acid metabolism	ko01100//Metabolic pathways;ko01110//Biosynthesis of secondary metabolites;ko01200//Carbon metabolism;ko04016//MAPK signaling pathway - plant;ko00630//Glyoxylate and dicarboxylate metabolism;ko04146//Peroxisome;ko00380//Tryptophan metabolism	K03781;K03781;K03781;K03781;K03781;K03781;K03781	GO:0005575//cellular_component;GO:0005576//extracellular region;GO:0005618//cell wall;GO:0005622//intracellular anatomical structure;GO:0005737//cytoplasm;GO:0005739//mitochondrion;GO:0005773//vacuole;GO:0005777//peroxisome;GO:0005829//cytosol;GO:0005840//ribosome;GO:0005886//plasma membrane;GO:0005911//cell-cell junction;GO:0009506//plasmodesma;GO:0009507//chloroplast;GO:0009514//glyoxysome;GO:0…	GO:0003674//molecular_function;GO:0003676//nucleic acid binding;GO:0003723//RNA binding;GO:0003729//mRNA binding;GO:0003824//catalytic activity;GO:0004096//catalase activity;GO:0004601//peroxidase activity;GO:0005488//binding;GO:0016209//antioxidant activity;GO:0016491//oxidoreductase activity;GO:0016684//oxidoreductase activity, acting on peroxide as acceptor;GO:0020037//heme binding;GO:0043167/…	GO:0000302//response to reactive oxygen species;GO:0006950//response to stress;GO:0006979//response to oxidative stress;GO:0006995//cellular response to nitrogen starvation;GO:0007154//cell communication;GO:0008150//biological_process;GO:0008152//metabolic process;GO:0009056//catabolic process;GO:0009266//response to temperature stimulus;GO:0009267//cellular response to starvation;GO:0009314//res…	--
Unigene0001210	5.998	1.08	7.65	2.72	6.301	4.878	RPP13L2	XP_015161238.1 PREDICTED: disease resistance protein RPP13-like [Solanum tuberosum]	-	-	-	-	-	GO:0043531//ADP binding	-	--
Unigene0001211	0.6	0	0	0	0.693	0	--	KAF3627004.1 putative disease resistance protein RPP13-like [Capsicum annuum]	-	-	-	-	-	-	-	--
Unigene0001215	6.462	7.127	6.427	1.107	0.725	0.585	--	XP_009597101.1 uncharacterized protein LOC104093095 [Nicotiana tomentosiformis]	-	-	-	-	-	-	-	--
Unigene0001216	2.26	2.424	3.013	0.604	0	0.202	--	KAG5613725.1 hypothetical protein H5410_013549 [Solanum commersonii]	-	-	-	-	-	-	-	--
Unigene0001217	2.805	2.872	3.73	1.09	1.584	1.283	rnaseh2b	PHT33737.1 hypothetical protein CQW23_25537 [Capsicum baccatum]	Genetic Information Processing	Replication and repair	ko03030//DNA replication	K10744	-	-	-	--
Unigene0001218	15.311	11.562	11.661	10.095	11.047	9.37	MCCA	KAH0634937.1 hypothetical protein KY284_037723 [Solanum tuberosum]	Metabolism;Metabolism	Global and overview maps;Amino acid metabolism	ko01100//Metabolic pathways;ko00280//Valine, leucine and isoleucine degradation	K01968;K01968	GO:0002169//3-methylcrotonyl-CoA carboxylase complex, mitochondrial;GO:0005575//cellular_component;GO:0005622//intracellular anatomical structure;GO:0005737//cytoplasm;GO:0005739//mitochondrion;GO:0005759//mitochondrial matrix;GO:0005829//cytosol;GO:0005840//ribosome;GO:0005951//carbamoyl-phosphate synthase complex;GO:0009317//acetyl-CoA carboxylase complex;GO:0009507//chloroplast;GO:0009536//pla…	GO:0000166//nucleotide binding;GO:0003674//molecular_function;GO:0003824//catalytic activity;GO:0003989//acetyl-CoA carboxylase activity;GO:0004075//biotin carboxylase activity;GO:0004088//carbamoyl-phosphate synthase (glutamine-hydrolyzing) activity;GO:0004149//dihydrolipoyllysine-residue succinyltransferase activity;GO:0004485//methylcrotonoyl-CoA carboxylase activity;GO:0004736//pyruvate carbo…	GO:0006082//organic acid metabolic process;GO:0006086//acetyl-CoA biosynthetic process from pyruvate;GO:0006094//gluconeogenesis;GO:0006099//tricarboxylic acid cycle;GO:0006520//cellular amino acid metabolic process;GO:0006551//leucine metabolic process;GO:0006552//leucine catabolic process;GO:0006554//lysine catabolic process;GO:0006629//lipid metabolic process;GO:0006631//fatty acid metabolic p…	--
Unigene0001220	0	0	0	0.671	0	0	--	XP_009780650.1 PREDICTED: uncharacterized protein LOC104229672 [Nicotiana sylvestris]	-	-	-	-	-	-	-	--
Unigene0001222	0.394	0	0.166	0	0.227	0.422	--	-	-	-	-	-	-	-	-	--
Unigene0001224	0.769	1.346	0.995	0.758	0.137	0.19	--	-	-	-	-	-	-	-	-	--
Unigene0001225	0.465	0	0	0.497	0	0	--	-	-	-	-	-	-	-	-	--
Unigene0001226	4.369	5.331	4.921	7.4	7.503	7.332	At1g79820	KAG5601996.1 hypothetical protein H5410_033366 [Solanum commersonii]	-	-	-	-	GO:0005575//cellular_component;GO:0005622//intracellular anatomical structure;GO:0005737//cytoplasm;GO:0005768//endosome;GO:0005794//Golgi apparatus;GO:0005802//trans-Golgi network;GO:0005887//integral component of plasma membrane;GO:0009507//chloroplast;GO:0009526//plastid envelope;GO:0009536//plastid;GO:0009941//chloroplast envelope;GO:0012505//endomembrane system;GO:0016020//membrane;GO:001602…	GO:0003674//molecular_function;GO:0005215//transporter activity;GO:0008028//monocarboxylic acid transmembrane transporter activity;GO:0015295//solute:proton symporter activity;GO:0022857//transmembrane transporter activity;GO:0042910//xenobiotic transmembrane transporter activity;GO:0051119//sugar transmembrane transporter activity	GO:0006810//transport;GO:0006855//xenobiotic transmembrane transport;GO:0008150//biological_process;GO:0008643//carbohydrate transport;GO:0015718//monocarboxylic acid transport;GO:0042908//xenobiotic transport;GO:0051179//localization;GO:0051234//establishment of localization;GO:0055085//transmembrane transport;GO:0071702//organic substance transport	--
Unigene0001227	0	0	0.75	0	1.029	0	--	-	-	-	-	-	-	-	-	--
Unigene0001229	0.601	0.099	0.084	0.107	1.389	1.075	--	-	-	-	-	-	-	-	-	--
Unigene0001230	0.469	0	0	0	0	0	TULP10	XP_009786613.1 PREDICTED: tubby-like F-box protein 5 [Nicotiana sylvestris]	-	-	-	-	-	GO:0005515//protein binding	-	--
Unigene0001231	0	0	0	0	0	0.248	--	-	-	-	-	-	-	GO:0008915//lipid-A-disaccharide synthase activity	GO:0009245//lipid A biosynthetic process	--
Unigene0001234	0	0	0	0.578	0	0	--	-	-	-	-	-	-	-	-	--
Unigene0001235	0.737	0	0	0.787	0	0	--	-	-	-	-	-	-	-	-	--
Unigene0001236	10.195	12.311	11.031	14.166	12.731	12.545	TGD2	KAG5623074.1 hypothetical protein H5410_008292 [Solanum commersonii]	-	-	-	-	GO:0005575//cellular_component;GO:0005622//intracellular anatomical structure;GO:0005737//cytoplasm;GO:0009507//chloroplast;GO:0009526//plastid envelope;GO:0009528//plastid inner membrane;GO:0009536//plastid;GO:0009706//chloroplast inner membrane;GO:0009941//chloroplast envelope;GO:0016020//membrane;GO:0016021//integral component of membrane;GO:0019866//organelle inner membrane;GO:0031090//organe…	GO:0003674//molecular_function;GO:0005215//transporter activity;GO:0005319//lipid transporter activity;GO:0005488//binding;GO:0005543//phospholipid binding;GO:0008289//lipid binding;GO:0043167//ion binding;GO:0043168//anion binding	GO:0006810//transport;GO:0006869//lipid transport;GO:0008150//biological_process;GO:0010876//lipid localization;GO:0032365//intracellular lipid transport;GO:0033036//macromolecule localization;GO:0046907//intracellular transport;GO:0051179//localization;GO:0051234//establishment of localization;GO:0051641//cellular localization;GO:0051649//establishment of localization in cell;GO:0071702//organic…	--
Unigene0001237	4.897	2.667	4.864	3.507	3.283	3.627	TGD2	PHT56224.1 Protein TRIGALACTOSYLDIACYLGLYCEROL 2, chloroplastic [Capsicum baccatum]	-	-	-	-	-	-	-	--
Unigene0001238	6.651	11.231	10.373	30.16	30.667	24.877	exosc3	XP_019239709.1 PREDICTED: putative exosome complex component rrp40 isoform X1 [Nicotiana attenuata]	-	-	-	-	-	GO:0003676//nucleic acid binding;GO:0003723//RNA binding	-	--
Unigene0001239	0	0	0	0.952	0	0.478	--	XP_015077607.1 probable LRR receptor-like serine/threonine-protein kinase At3g47570 [Solanum pennellii]	-	-	-	-	-	GO:0004672//protein kinase activity;GO:0005515//protein binding;GO:0005524//ATP binding	GO:0006468//protein phosphorylation	--
Unigene0001240	47.068	60.758	38.615	32.2	17.605	30.133	At3g58610	XP_009766073.1 PREDICTED: ketol-acid reductoisomerase, chloroplastic-like [Nicotiana sylvestris]	Metabolism;Metabolism;Metabolism;Metabolism;Metabolism;Metabolism	Global and overview maps;Global and overview maps;Global and overview maps;Global and overview maps;Metabolism of cofactors and vitamins;Amino acid metabolism	ko01100//Metabolic pathways;ko01110//Biosynthesis of secondary metabolites;ko01230//Biosynthesis of amino acids;ko01210//2-Oxocarboxylic acid metabolism;ko00770//Pantothenate and CoA biosynthesis;ko00290//Valine, leucine and isoleucine biosynthesis	K00053;K00053;K00053;K00053;K00053;K00053	-	GO:0004455//ketol-acid reductoisomerase activity	GO:0009082//branched-chain amino acid biosynthetic process;GO:0009097//isoleucine biosynthetic process;GO:0009099//valine biosynthetic process	--
Unigene0001241	21.596	20.725	23.55	7.65	7.042	7.188	PKL	XP_006343513.1 PREDICTED: CHD3-type chromatin-remodeling factor PICKLE-like [Solanum tuberosum]	-	-	-	-	GO:0070823//HDA1 complex	GO:0003677//DNA binding;GO:0005524//ATP binding;GO:0016787//hydrolase activity	GO:0016575//histone deacetylation	--
Unigene0001242	1.102	0	0	0.707	1.528	0	--	-	-	-	-	-	-	-	-	--
Unigene0001243	60.264	65.359	61.396	55.874	54.529	56.24	LIP1P	XP_004252893.1 lipoyl synthase, chloroplastic [Solanum lycopersicum]	Metabolism;Metabolism	Global and overview maps;Metabolism of cofactors and vitamins	ko01100//Metabolic pathways;ko00785//Lipoic acid metabolism	K03644;K03644	GO:0005575//cellular_component;GO:0005622//intracellular anatomical structure;GO:0005737//cytoplasm;GO:0009507//chloroplast;GO:0009536//plastid;GO:0043226//organelle;GO:0043227//membrane-bounded organelle;GO:0043229//intracellular organelle;GO:0043231//intracellular membrane-bounded organelle	GO:0003674//molecular_function;GO:0003824//catalytic activity;GO:0004076//biotin synthase activity;GO:0005488//binding;GO:0016740//transferase activity;GO:0016782//transferase activity, transferring sulphur-containing groups;GO:0016783//sulfurtransferase activity;GO:0016992//lipoate synthase activity;GO:0043167//ion binding;GO:0043169//cation binding;GO:0046872//metal ion binding;GO:0051536//iron…	GO:0006082//organic acid metabolic process;GO:0006464//cellular protein modification process;GO:0006629//lipid metabolic process;GO:0006631//fatty acid metabolic process;GO:0006633//fatty acid biosynthetic process;GO:0006790//sulfur compound metabolic process;GO:0006807//nitrogen compound metabolic process;GO:0008150//biological_process;GO:0008152//metabolic process;GO:0008610//lipid biosynthetic…	--
Unigene0001244	1.802	3.994	2.89	2.018	6.051	3.409	RTNLB14	KAG5603896.1 hypothetical protein H5410_025388 [Solanum commersonii]	-	-	-	-	-	-	-	--
Unigene0001245	0.297	0	0	0	0	0	--	-	-	-	-	-	-	-	-	--
Unigene0001246	16.957	16.586	21.064	19.065	18.463	20.923	TIP41L	KAH0733452.1 hypothetical protein KY289_004640 [Solanum tuberosum]	-	-	-	-	-	-	GO:0043666//regulation of phosphoprotein phosphatase activity	--
Unigene0001247	0.423	0.524	0	0.905	0.367	0.114	--	PHT41739.1 hypothetical protein CQW23_20593 [Capsicum baccatum]	-	-	-	-	-	-	-	--
Unigene0001248	27.809	24.646	30.491	33.486	29.263	34.827	TIP41L	TMW93719.1 hypothetical protein EJD97_011243 [Solanum chilense]	-	-	-	-	GO:0005575//cellular_component;GO:0005622//intracellular anatomical structure;GO:0005737//cytoplasm;GO:0005829//cytosol	-	GO:0043666//regulation of phosphoprotein phosphatase activity	--
Unigene0001249	0.171	0.169	0.719	0	0.395	0.183	--	-	-	-	-	-	-	-	-	--
Unigene0001250	2.109	2.089	1.321	0.367	1.191	0.474	FZR3	XP_006343746.1 PREDICTED: protein FIZZY-RELATED 3 [Solanum tuberosum]	Genetic Information Processing	Folding, sorting and degradation	ko04120//Ubiquitin mediated proteolysis	K03364	-	GO:0003674//molecular_function;GO:0005488//binding;GO:0005515//protein binding;GO:0010997//anaphase-promoting complex binding;GO:0030234//enzyme regulator activity;GO:0044877//protein-containing complex binding;GO:0047834//D-threo-aldose 1-dehydrogenase activity;GO:0055106//ubiquitin-protein transferase regulator activity;GO:0097027//ubiquitin-protein transferase activator activity;GO:0098772//mo…	GO:0006464//cellular protein modification process;GO:0006807//nitrogen compound metabolic process;GO:0007049//cell cycle;GO:0008150//biological_process;GO:0008152//metabolic process;GO:0009893//positive regulation of metabolic process;GO:0009987//cellular process;GO:0010604//positive regulation of macromolecule metabolic process;GO:0016567//protein ubiquitination;GO:0019222//regulation of metabol…	--
Unigene0001251	0.673	0	0	0	0	0.722	--	-	-	-	-	-	-	-	-	--
Unigene0001252	1.056	0	0.296	0	0	0	--	-	-	-	-	-	-	-	-	--
Unigene0001253	0.331	0	0	0.354	0	0	PP5	XP_009766210.1 PREDICTED: serine/threonine-protein phosphatase 5 isoform X1 [Nicotiana sylvestris]	-	-	-	-	GO:0005575//cellular_component;GO:0005622//intracellular anatomical structure;GO:0005634//nucleus;GO:0005635//nuclear envelope;GO:0005654//nucleoplasm;GO:0005737//cytoplasm;GO:0005783//endoplasmic reticulum;GO:0005789//endoplasmic reticulum membrane;GO:0005819//spindle;GO:0005829//cytosol;GO:0005856//cytoskeleton;GO:0005886//plasma membrane;GO:0005911//cell-cell junction;GO:0009506//plasmodesma;G…	GO:0000166//nucleotide binding;GO:0001965//G-protein alpha-subunit binding;GO:0003674//molecular_function;GO:0003676//nucleic acid binding;GO:0003723//RNA binding;GO:0003824//catalytic activity;GO:0004721//phosphoprotein phosphatase activity;GO:0004722//protein serine/threonine phosphatase activity;GO:0005488//binding;GO:0005515//protein binding;GO:0005524//ATP binding;GO:0008017//microtubule bin…	GO:0000165//MAPK cascade;GO:0000278//mitotic cell cycle;GO:0000302//response to reactive oxygen species;GO:0001101//response to acid chemical;GO:0001932//regulation of protein phosphorylation;GO:0001933//negative regulation of protein phosphorylation;GO:0006139//nucleobase-containing compound metabolic process;GO:0006259//DNA metabolic process;GO:0006281//DNA repair;GO:0006325//chromatin organiza…	--
Unigene0001254	0.322	0.191	0.379	0.551	0.372	1.313	--	XP_033508274.1 uncharacterized protein LOC117273268 [Nicotiana tomentosiformis]	-	-	-	-	-	GO:0016798//hydrolase activity, acting on glycosyl bonds	GO:0005992//trehalose biosynthetic process	--
Unigene0001256	0	0	0	0.582	0	0	--	-	-	-	-	-	-	-	-	--
Unigene0001258	3.398	3.775	3.175	1.86	2.443	2.536	--	-	-	-	-	-	-	-	-	--
Unigene0001259	6.234	6.002	6.56	7.96	7.606	8.087	--	XP_006340183.1 PREDICTED: protein ENHANCED DISEASE RESISTANCE 2-like [Solanum tuberosum]	-	-	-	-	-	GO:0008289//lipid binding	-	--
Unigene0001260	12.306	9.972	11.231	6.957	8.833	9.282	CPN60B4	XP_027768885.1 protein ENHANCED DISEASE RESISTANCE 2-like isoform X2 [Solanum pennellii]	-	-	-	-	-	GO:0005515//protein binding;GO:0005524//ATP binding;GO:0016887//ATP hydrolysis activity	GO:0006457//protein folding	--
Unigene0001262	0.153	0.152	1.161	0	0.354	0.494	--	-	-	-	-	-	-	-	-	--
Unigene0001263	14.812	12.075	15	8.511	5.47	7.472	--	XP_006339897.1 PREDICTED: uncharacterized protein LOC102592626 [Solanum tuberosum]	-	-	-	-	-	-	-	--
Unigene0001264	169.048	98.477	110.612	2.229	2.41	2.239	EARLI1	XP_033510938.1 14 kDa proline-rich protein DC2.15-like [Nicotiana tomentosiformis]	-	-	-	-	-	-	-	--
Unigene0001265	0	0	0	1.619	0.35	0.976	At4g12490	KAF3626410.1 pEARLI1-like lipid transfer protein 1 [Capsicum annuum]	-	-	-	-	-	-	-	--
Unigene0001266	11.812	10.636	12.978	17.662	17.158	16.664	At4g38150	XP_009759999.1 PREDICTED: pentatricopeptide repeat-containing protein At4g38150-like [Nicotiana sylvestris]	-	-	-	-	-	-	-	--
Unigene0001267	2.133	1.258	2.063	2.668	5.036	3.752	CREG1	XP_009793787.1 PREDICTED: protein CREG1 [Nicotiana sylvestris]	-	-	-	-	-	-	-	--
Unigene0001269	0.504	0.749	0.318	1.213	0.874	1.083	--	-	-	-	-	-	-	-	-	--
Unigene0001270	2.529	2.998	1.229	0.647	1.358	1.185	--	KAF3655925.1 Membrane magnesium transporter [Capsicum annuum]	-	-	-	-	-	-	-	--
Unigene0001271	0.13	0.129	1.096	1.809	0.451	1.957	--	-	-	-	-	-	-	-	-	--
Unigene0001272	1.136	0.321	0.683	0	0	0	--	-	-	-	-	-	-	-	-	--
Unigene0001273	0	0	0.707	0	0	0	--	-	-	-	-	-	-	-	-	--
Unigene0001275	1.183	0.078	2.854	0.253	0.364	0.508	--	XP_016446165.1 PREDICTED: TMV resistance protein N-like [Nicotiana tabacum]	-	-	-	-	-	-	-	--
Unigene0001276	0.139	0	1.407	0	0.322	0	N	XP_019266616.1 PREDICTED: TMV resistance protein N-like [Nicotiana attenuata]	-	-	-	-	-	GO:0005515//protein binding	-	--
Unigene0001277	50.459	65.422	72.876	97.086	87.841	70.248	At1g51650	XP_004241929.1 ATP synthase subunit epsilon, mitochondrial [Solanum lycopersicum]	Metabolism;Metabolism	Global and overview maps;Energy metabolism	ko01100//Metabolic pathways;ko00190//Oxidative phosphorylation	K02135;K02135	GO:0000275//mitochondrial proton-transporting ATP synthase complex, catalytic sector F(1);GO:0005575//cellular_component;GO:0005622//intracellular anatomical structure;GO:0005737//cytoplasm;GO:0005739//mitochondrion;GO:0005740//mitochondrial envelope;GO:0005743//mitochondrial inner membrane;GO:0005753//mitochondrial proton-transporting ATP synthase complex;GO:0016020//membrane;GO:0016469//proton-…	GO:0003674//molecular_function;GO:0003824//catalytic activity;GO:0005215//transporter activity;GO:0008324//cation transmembrane transporter activity;GO:0015075//ion transmembrane transporter activity;GO:0015078//proton transmembrane transporter activity;GO:0015318//inorganic molecular entity transmembrane transporter activity;GO:0015399//primary active transmembrane transporter activity;GO:001646…	GO:0006139//nucleobase-containing compound metabolic process;GO:0006163//purine nucleotide metabolic process;GO:0006164//purine nucleotide biosynthetic process;GO:0006725//cellular aromatic compound metabolic process;GO:0006753//nucleoside phosphate metabolic process;GO:0006754//ATP biosynthetic process;GO:0006793//phosphorus metabolic process;GO:0006796//phosphate-containing compound metabolic p…	--
Unigene0001279	1.139	1.466	1.822	0.122	0	0.122	--	-	-	-	-	-	-	-	-	--
Unigene0001281	0.613	0.809	1.318	0.655	1.18	0.658	--	-	-	-	-	-	-	-	-	--
Unigene0001282	0.617	0.367	0.624	0.792	0.713	1.458	--	-	-	-	-	-	-	-	-	--
Unigene0001283	3.598	3.476	3.512	2.265	2.781	3.152	--	-	-	-	-	-	-	-	-	--
Unigene0001284	1.047	1.797	0	0	0.161	2.436	--	-	-	-	-	-	-	-	-	--
Unigene0001285	3.445	3.776	4.804	2.361	1.854	1.835	--	-	-	-	-	-	-	-	-	--
Unigene0001286	6.658	8.045	7.971	8.097	7.272	9.115	CGR2	XP_015071920.1 probable pectin methylesterase CGR3 [Solanum pennellii]	-	-	-	-	-	GO:0008168//methyltransferase activity	GO:0009086//methionine biosynthetic process	--
Unigene0001287	5.659	4.665	5.716	7.005	10.251	8.335	ORC3	KAH0774541.1 hypothetical protein KY290_011678 [Solanum tuberosum]	-	-	-	-	GO:0000228//nuclear chromosome;GO:0000781//chromosome, telomeric region;GO:0000785//chromatin;GO:0000808//origin recognition complex;GO:0005575//cellular_component;GO:0005622//intracellular anatomical structure;GO:0005634//nucleus;GO:0005654//nucleoplasm;GO:0005656//nuclear pre-replicative complex;GO:0005657//replication fork;GO:0005664//nuclear origin of replication recognition complex;GO:000569…	GO:0003674//molecular_function;GO:0003676//nucleic acid binding;GO:0003677//DNA binding;GO:0003682//chromatin binding;GO:0003688//DNA replication origin binding;GO:0003690//double-stranded DNA binding;GO:0005488//binding;GO:0043565//sequence-specific DNA binding;GO:0097159//organic cyclic compound binding;GO:1901363//heterocyclic compound binding;GO:1990837//sequence-specific double-stranded DNA …	GO:0000003//reproduction;GO:0000082//G1/S transition of mitotic cell cycle;GO:0000278//mitotic cell cycle;GO:0001667//ameboidal-type cell migration;GO:0002064//epithelial cell development;GO:0002065//columnar/cuboidal epithelial cell differentiation;GO:0002066//columnar/cuboidal epithelial cell development;GO:0003006//developmental process involved in reproduction;GO:0003008//system process;GO:00…	--
Unigene0001289	0	1.5	0	0.324	0	0	--	-	-	-	-	-	-	-	-	--
Unigene0001290	0	0	0	0.938	0	0	--	KAF3657593.1 putative linoleate 13S-lipoxygenase 2-1, chloroplastic-like [Capsicum annuum]	-	-	-	-	GO:0000803//sex chromosome;GO:0000805//X chromosome;GO:0005575//cellular_component;GO:0005622//intracellular anatomical structure;GO:0005634//nucleus;GO:0005654//nucleoplasm;GO:0005694//chromosome;GO:0031519//PcG protein complex;GO:0031974//membrane-enclosed lumen;GO:0031981//nuclear lumen;GO:0032991//protein-containing complex;GO:0043226//organelle;GO:0043227//membrane-bounded organelle;GO:00432…	GO:0003674//molecular_function;GO:0005488//binding;GO:0008270//zinc ion binding;GO:0043167//ion binding;GO:0043169//cation binding;GO:0046872//metal ion binding;GO:0046914//transition metal ion binding	GO:0006139//nucleobase-containing compound metabolic process;GO:0006325//chromatin organization;GO:0006349//regulation of gene expression by genetic imprinting;GO:0006351//transcription, DNA-templated;GO:0006355//regulation of transcription, DNA-templated;GO:0006464//cellular protein modification process;GO:0006513//protein monoubiquitination;GO:0006725//cellular aromatic compound metabolic proce…	--
Unigene0001291	2.024	1.336	1.704	1.442	2.079	1.69	--	-	-	-	-	-	-	-	-	--
Unigene0001292	0.969	0.959	1.305	0.414	0.672	0.208	--	-	-	-	-	-	-	-	-	--
Unigene0001293	35.277	32.373	30.694	11.757	10.781	12.753	--	XP_019243910.1 PREDICTED: uncharacterized protein LOC109223891 [Nicotiana attenuata]	-	-	-	-	GO:0005634//nucleus	-	-	--
Unigene0001295	0.57	0.903	0.384	0.853	0.659	1.224	--	-	-	-	-	-	-	-	-	--
Unigene0001296	0.377	0.249	0.211	57.176	33.087	33.967	--	TMW87167.1 hypothetical protein EJD97_020335 [Solanum chilense]	-	-	-	-	-	-	-	--
Unigene0001297	0.988	0.244	0.416	0.264	0.285	0	--	PHT30805.1 Phospholipid:diacylglycerol acyltransferase 1 [Capsicum baccatum]	-	-	-	-	GO:0005575//cellular_component;GO:0005622//intracellular anatomical structure;GO:0005737//cytoplasm;GO:0005739//mitochondrion;GO:0009507//chloroplast;GO:0009536//plastid;GO:0043226//organelle;GO:0043227//membrane-bounded organelle;GO:0043229//intracellular organelle;GO:0043231//intracellular membrane-bounded organelle	GO:0003674//molecular_function;GO:0003824//catalytic activity;GO:0004659//prenyltransferase activity;GO:0005488//binding;GO:0016740//transferase activity;GO:0016765//transferase activity, transferring alkyl or aryl (other than methyl) groups;GO:0043167//ion binding;GO:0043169//cation binding;GO:0046872//metal ion binding;GO:0050347//trans-octaprenyltranstransferase activity;GO:0052924//all-trans-…	GO:0000003//reproduction;GO:0003006//developmental process involved in reproduction;GO:0006629//lipid metabolic process;GO:0006720//isoprenoid metabolic process;GO:0006743//ubiquinone metabolic process;GO:0006744//ubiquinone biosynthetic process;GO:0007275//multicellular organism development;GO:0008150//biological_process;GO:0008152//metabolic process;GO:0008299//isoprenoid biosynthetic process;G…	--
Unigene0001298	0.267	0.529	1.124	0.857	0	0.573	--	-	-	-	-	-	-	-	-	--
Unigene0001300	29.609	27.969	28.533	12.285	18.574	13.174	NFD2	KAF3612322.1 Protein NUCLEAR FUSION DEFECTIVE 2 [Capsicum annuum]	-	-	-	-	GO:0005575//cellular_component;GO:0005622//intracellular anatomical structure;GO:0005737//cytoplasm;GO:0005773//vacuole;GO:0043226//organelle;GO:0043227//membrane-bounded organelle;GO:0043229//intracellular organelle;GO:0043231//intracellular membrane-bounded organelle	GO:0003674//molecular_function;GO:0003676//nucleic acid binding;GO:0003723//RNA binding;GO:0003725//double-stranded RNA binding;GO:0003824//catalytic activity;GO:0004518//nuclease activity;GO:0004519//endonuclease activity;GO:0004521//endoribonuclease activity;GO:0004525//ribonuclease III activity;GO:0004540//ribonuclease activity;GO:0005488//binding;GO:0016787//hydrolase activity;GO:0016788//hyd…	GO:0000741//karyogamy;GO:0006139//nucleobase-containing compound metabolic process;GO:0006364//rRNA processing;GO:0006396//RNA processing;GO:0006397//mRNA processing;GO:0006399//tRNA metabolic process;GO:0006401//RNA catabolic process;GO:0006725//cellular aromatic compound metabolic process;GO:0006807//nitrogen compound metabolic process;GO:0006996//organelle organization;GO:0006997//nucleus orga…	--
Unigene0001301	0.821	0	0.461	0	0	0	--	-	-	-	-	-	GO:0005576//extracellular region	-	GO:0001503//ossification;GO:0007155//cell adhesion	--
Unigene0001302	0	0	0	0.431	0.233	0	--	-	-	-	-	-	-	-	-	--
Unigene0001304	2217.03	2831.08	2363.44	68.21	23.024	25.536	TPRP-F1	KAH0735839.1 hypothetical protein KY285_011546 [Solanum tuberosum]	-	-	-	-	-	-	-	--
Unigene0001305	0.315	0	0	0	0	0	--	-	-	-	-	-	-	-	-	--
Unigene0001306	1.926	2.829	2.144	0	0.072	0	--	GFY80889.1 bifunctional inhibitor/lipid-transfer protein/seed storage 2S albumin superfamily protein [Actinidia rufa]	-	-	-	-	-	-	-	--
Unigene0001307	0.33	2.942	1.667	0	0	0	--	PHU11350.1 hypothetical protein BC332_18280 [Capsicum chinense]	-	-	-	-	-	-	-	--
Unigene0001308	39.232	42.603	40.589	19.847	20.19	33.327	HSP17.5-M	CAA12387.1 Hsp20.1 protein [Solanum peruvianum]	Genetic Information Processing	Folding, sorting and degradation	ko04141//Protein processing in endoplasmic reticulum	K13993	-	-	-	--
Unigene0001309	0	0.219	0	0	0.512	0.238	--	KAG5588706.1 hypothetical protein H5410_049140 [Solanum commersonii]	-	-	-	-	-	-	-	--
Unigene0001310	0	0	0.76	0.643	0	0	--	-	-	-	-	-	-	-	-	--
Unigene0001311	6.148	6.528	6.775	7.524	8.924	8.034	--	XP_006347306.1 PREDICTED: uncharacterized protein LOC102601931 [Solanum tuberosum]	-	-	-	-	-	-	-	--
Unigene0001312	0	0.75	0	0	0	0	--	-	-	-	-	-	-	-	-	--
Unigene0001313	0.545	12.597	5.661	0.389	0	0	--	XP_016563728.1 PREDICTED: defensin J1-2-like [Capsicum annuum]	-	-	-	-	GO:0016021//integral component of membrane	-	-	--
Unigene0001314	0.52	0.155	0.263	2.058	0.962	2.569	7DLGT	KAF3682017.1 7-deoxyloganetic acid glucosyltransferase [Capsicum annuum]	-	-	-	-	-	GO:0008194//UDP-glycosyltransferase activity;GO:0016758//hexosyltransferase activity	-	--
Unigene0001316	0	0	0	0	0.359	0.333	--	-	-	-	-	-	-	-	-	--
Unigene0001317	3.275	3.243	5.275	4.566	2.633	3.363	--	XP_006347535.1 PREDICTED: uncharacterized protein LOC102595320 [Solanum tuberosum]	-	-	-	-	-	-	-	--
Unigene0001318	1.011	0	0	0.18	0.195	0	--	-	-	-	-	-	-	-	-	--
Unigene0001320	0.306	0	0.172	0.764	1.417	0.219	--	-	-	-	-	-	-	-	-	--
Unigene0001321	10.197	11.789	11.801	20.011	20.436	19.378	DNAJC7	KAH0681125.1 hypothetical protein KY284_022210 [Solanum tuberosum]	-	-	-	-	-	GO:0005515//protein binding	GO:0006457//protein folding;GO:0009408//response to heat	--
Unigene0001322	0	0.268	0	2.023	0	0	--	-	-	-	-	-	-	GO:0005515//protein binding	-	--
Unigene0001323	4.743	3.322	4.674	3.586	2.54	1.863	SAUR32	XP_016480424.1 PREDICTED: auxin-responsive protein SAUR32-like [Nicotiana tabacum]	Environmental Information Processing	Signal transduction	ko04075//Plant hormone signal transduction	K14488	-	-	GO:0009733//response to auxin	--
Unigene0001324	0	0.146	0.249	0.789	0.341	2.06	--	-	-	-	-	-	-	-	-	--
Unigene0001326	0.457	1.018	0.625	0.427	0.528	0.429	SDP1	XP_016451665.1 PREDICTED: triacylglycerol lipase SDP1-like isoform X1 [Nicotiana tabacum]	Metabolism;Metabolism;Metabolism;Metabolism;Metabolism;Metabolism;Metabolism;Metabolism;Metabolism	Global and overview maps;Global and overview maps;Lipid metabolism;Lipid metabolism;Lipid metabolism;Lipid metabolism;Lipid metabolism;Lipid metabolism;Lipid metabolism	ko01100//Metabolic pathways;ko01110//Biosynthesis of secondary metabolites;ko00564//Glycerophospholipid metabolism;ko00561//Glycerolipid metabolism;ko00592//alpha-Linolenic acid metabolism;ko00100//Steroid biosynthesis;ko00565//Ether lipid metabolism;ko00591//Linoleic acid metabolism;ko00590//Arachidonic acid metabolism	K14674;K14674;K14674;K14674;K14674;K14674;K14674;K14674;K14674	-	GO:0004806//triglyceride lipase activity	GO:0006629//lipid metabolic process	--
Unigene0001327	0.599	1.038	1.324	1.441	1.212	0.965	SDP1	PHT37210.1 Triacylglycerol lipase SDP1L [Capsicum baccatum]	Metabolism;Metabolism;Metabolism;Metabolism;Metabolism;Metabolism;Metabolism;Metabolism;Metabolism	Global and overview maps;Global and overview maps;Lipid metabolism;Lipid metabolism;Lipid metabolism;Lipid metabolism;Lipid metabolism;Lipid metabolism;Lipid metabolism	ko01100//Metabolic pathways;ko01110//Biosynthesis of secondary metabolites;ko00564//Glycerophospholipid metabolism;ko00561//Glycerolipid metabolism;ko00592//alpha-Linolenic acid metabolism;ko00100//Steroid biosynthesis;ko00565//Ether lipid metabolism;ko00591//Linoleic acid metabolism;ko00590//Arachidonic acid metabolism	K14674;K14674;K14674;K14674;K14674;K14674;K14674;K14674;K14674	-	GO:0004806//triglyceride lipase activity	GO:0006629//lipid metabolic process	--
Unigene0001328	0	0	0	0.808	0.349	0.812	--	-	-	-	-	-	-	-	-	--
Unigene0001330	44.947	31.478	33.965	25.424	22.438	23.878	SDP1	XP_015055986.1 triacylglycerol lipase SDP1 [Solanum pennellii]	Metabolism;Metabolism;Metabolism;Metabolism;Metabolism;Metabolism;Metabolism;Metabolism;Metabolism	Global and overview maps;Global and overview maps;Lipid metabolism;Lipid metabolism;Lipid metabolism;Lipid metabolism;Lipid metabolism;Lipid metabolism;Lipid metabolism	ko01100//Metabolic pathways;ko01110//Biosynthesis of secondary metabolites;ko00564//Glycerophospholipid metabolism;ko00561//Glycerolipid metabolism;ko00592//alpha-Linolenic acid metabolism;ko00100//Steroid biosynthesis;ko00565//Ether lipid metabolism;ko00591//Linoleic acid metabolism;ko00590//Arachidonic acid metabolism	K14674;K14674;K14674;K14674;K14674;K14674;K14674;K14674;K14674	-	GO:0004806//triglyceride lipase activity	GO:0006629//lipid metabolic process	--
Unigene0001331	0	0	1.852	0.362	0.782	0.545	Rpl12	KAF7846160.1 hypothetical protein BT93_L5062 [Corymbia citriodora subsp. variegata] [Corymbia citriodora]	Genetic Information Processing	Translation	ko03010//Ribosome	K02870	GO:0000315//organellar large ribosomal subunit;GO:0005840//ribosome;GO:0022625//cytosolic large ribosomal subunit	GO:0003735//structural constituent of ribosome	GO:0006412//translation	--
Unigene0001333	5.347	4.404	6.667	8.92	9.933	10.38	wdr44	KAH0688166.1 hypothetical protein KY284_018719 [Solanum tuberosum]	-	-	-	-	-	GO:0005515//protein binding	-	--
Unigene0001334	5.114	5.063	3.498	0.342	0.369	0.274	--	XP_006363131.1 PREDICTED: uncharacterized protein LOC102579386 [Solanum tuberosum]	-	-	-	-	-	-	-	--
Unigene0001335	7.036	8.447	6.856	9.221	11.808	9.105	MitHPPK/DHPS	XP_006348669.1 PREDICTED: folate synthesis bifunctional protein, mitochondrial-like [Solanum tuberosum]	Metabolism;Metabolism	Global and overview maps;Metabolism of cofactors and vitamins	ko01100//Metabolic pathways;ko00790//Folate biosynthesis	K13941;K13941	-	GO:0000166//nucleotide binding;GO:0003674//molecular_function;GO:0003824//catalytic activity;GO:0003848//2-amino-4-hydroxy-6-hydroxymethyldihydropteridine diphosphokinase activity;GO:0004150//dihydroneopterin aldolase activity;GO:0004156//dihydropteroate synthase activity;GO:0005488//binding;GO:0005524//ATP binding;GO:0016301//kinase activity;GO:0016740//transferase activity;GO:0016765//transfera…	GO:0006082//organic acid metabolic process;GO:0006575//cellular modified amino acid metabolic process;GO:0006725//cellular aromatic compound metabolic process;GO:0006760//folic acid-containing compound metabolic process;GO:0006766//vitamin metabolic process;GO:0006767//water-soluble vitamin metabolic process;GO:0006793//phosphorus metabolic process;GO:0006796//phosphate-containing compound metabo…	--
Unigene0001336	5.007	1.452	2.256	2.216	2.689	0.543	--	XP_016578790.1 PREDICTED: uncharacterized protein LOC107876361 [Capsicum annuum]	-	-	-	-	-	-	-	--
Unigene0001337	0	0.111	0.329	4.421	3.811	3.9	ABR1	XP_006346730.2 PREDICTED: ethylene-responsive transcription factor ABR1-like [Solanum tuberosum]	-	-	-	-	GO:0005575//cellular_component;GO:0005622//intracellular anatomical structure;GO:0005634//nucleus;GO:0043226//organelle;GO:0043227//membrane-bounded organelle;GO:0043229//intracellular organelle;GO:0043231//intracellular membrane-bounded organelle	GO:0003674//molecular_function;GO:0003676//nucleic acid binding;GO:0003677//DNA binding;GO:0003700//DNA-binding transcription factor activity;GO:0005488//binding;GO:0097159//organic cyclic compound binding;GO:0140110//transcription regulator activity;GO:1901363//heterocyclic compound binding	GO:0000160//phosphorelay signal transduction system;GO:0001101//response to acid chemical;GO:0006139//nucleobase-containing compound metabolic process;GO:0006351//transcription, DNA-templated;GO:0006355//regulation of transcription, DNA-templated;GO:0006725//cellular aromatic compound metabolic process;GO:0006807//nitrogen compound metabolic process;GO:0006950//response to stress;GO:0006952//defe…	ERF
Unigene0001338	13.977	20.037	17.757	18.422	16.55	12.334	UCH3	XP_009613998.1 ubiquitin carboxyl-terminal hydrolase 3-like isoform X1 [Nicotiana tomentosiformis]	-	-	-	-	-	GO:0004843//thiol-dependent deubiquitinase	GO:0006511//ubiquitin-dependent protein catabolic process	--
Unigene0001339	22.779	24.844	28.695	38.376	35.58	38.186	UCH3	KAH0668016.1 hypothetical protein KY285_029222 [Solanum tuberosum]	-	-	-	-	-	GO:0004843//thiol-dependent deubiquitinase	GO:0006511//ubiquitin-dependent protein catabolic process	--
Unigene0001344	0	0.856	0	0	0	0	--	-	-	-	-	-	-	-	-	--
Unigene0001345	8.889	8.029	9.878	19.628	17.617	13.852	At1g14780	KAH0634498.1 hypothetical protein KY284_037284 [Solanum tuberosum]	-	-	-	-	-	-	-	--
Unigene0001346	2.036	2.553	2.856	0.943	0.627	1.675	--	XP_015158872.1 PREDICTED: uncharacterized protein LOC107058077 [Solanum tuberosum]	-	-	-	-	GO:0005575//cellular_component;GO:0005622//intracellular anatomical structure;GO:0005737//cytoplasm;GO:0005739//mitochondrion;GO:0009507//chloroplast;GO:0009536//plastid;GO:0043226//organelle;GO:0043227//membrane-bounded organelle;GO:0043229//intracellular organelle;GO:0043231//intracellular membrane-bounded organelle	GO:0003674//molecular_function;GO:0003824//catalytic activity;GO:0003964//RNA-directed DNA polymerase activity;GO:0004659//prenyltransferase activity;GO:0005488//binding;GO:0016740//transferase activity;GO:0016765//transferase activity, transferring alkyl or aryl (other than methyl) groups;GO:0043167//ion binding;GO:0043169//cation binding;GO:0046872//metal ion binding;GO:0050347//trans-octapreny…	GO:0000003//reproduction;GO:0000373//Group II intron splicing;GO:0003006//developmental process involved in reproduction;GO:0006629//lipid metabolic process;GO:0006720//isoprenoid metabolic process;GO:0006743//ubiquinone metabolic process;GO:0006744//ubiquinone biosynthetic process;GO:0007275//multicellular organism development;GO:0008150//biological_process;GO:0008152//metabolic process;GO:00082…	--
Unigene0001347	0.73	1.929	1.845	0.26	0	0	--	KAF3667402.1 hypothetical protein FXO38_08614 [Capsicum annuum]	-	-	-	-	-	-	-	--
Unigene0001348	0.157	0.156	0.132	0	0.908	1.855	--	XP_019230029.1 PREDICTED: uncharacterized protein LOC109210997 [Nicotiana attenuata]	-	-	-	-	-	-	-	--
Unigene0001349	0.264	0.523	0	0	0	0	--	XP_019236372.1 PREDICTED: RNA-directed DNA polymerase from mobile element jockey-like, partial [Nicotiana attenuata]	-	-	-	-	-	GO:0003964//RNA-directed DNA polymerase activity	GO:0000373//Group II intron splicing	--
Unigene0001350	0.729	1.317	1.228	1.009	0.644	0.737	--	XP_009769314.1 PREDICTED: uncharacterized protein LOC104220188 [Nicotiana sylvestris]	-	-	-	-	-	-	-	--
Unigene0001351	0.658	0.605	0.554	0.754	0.815	0.555	SCL9	PHT36304.1 Scarecrow-like protein 9 [Capsicum baccatum]	-	-	-	-	-	-	-	GRAS
Unigene0001352	0.183	0.815	0.462	1.466	0.211	0.196	SCL9	XP_016553556.1 PREDICTED: scarecrow-like protein 9 [Capsicum annuum]	-	-	-	-	-	-	-	--
Unigene0001353	0	0	0	0.676	0	0.453	--	-	-	-	-	-	-	-	-	--
Unigene0001355	1.064	0.527	0.149	2.085	3.28	3.617	--	-	-	-	-	-	-	-	-	--
Unigene0001356	7.858	9.251	11.612	27.021	33.09	28.198	--	KAH0749659.1 hypothetical protein KY290_028891 [Solanum tuberosum]	-	-	-	-	-	-	-	--
Unigene0001357	1.13	1.343	1.142	0.604	0.784	0.728	--	XP_033509317.1 uncharacterized protein At4g22758-like [Nicotiana tomentosiformis]	-	-	-	-	-	-	-	--
Unigene0001358	0.251	0	0.211	0	0.58	0	--	-	-	-	-	-	-	-	-	--
Unigene0001359	1.313	0.325	0.829	0.175	0	0.705	--	-	-	-	-	-	-	-	-	--
Unigene0001360	0	0.341	0	0	1.592	0	TBL31	XP_016458460.1 PREDICTED: protein trichome birefringence-like 31 [Nicotiana tabacum]	-	-	-	-	-	-	-	--
Unigene0001361	0.402	0.996	0.593	0.323	0.93	0.648	TBL31	KAH0774564.1 hypothetical protein KY290_011701 [Solanum tuberosum]	-	-	-	-	GO:0005575//cellular_component;GO:0005622//intracellular anatomical structure;GO:0005737//cytoplasm;GO:0005794//Golgi apparatus;GO:0012505//endomembrane system;GO:0016020//membrane;GO:0016021//integral component of membrane;GO:0031224//intrinsic component of membrane;GO:0043226//organelle;GO:0043227//membrane-bounded organelle;GO:0043229//intracellular organelle;GO:0043231//intracellular membrane…	GO:0003674//molecular_function;GO:0003824//catalytic activity;GO:0008374//O-acyltransferase activity;GO:0016407//acetyltransferase activity;GO:0016413//O-acetyltransferase activity;GO:0016740//transferase activity;GO:0016746//acyltransferase activity;GO:0016747//acyltransferase activity, transferring groups other than amino-acyl groups;GO:1990538//xylan O-acetyltransferase activity	GO:0000271//polysaccharide biosynthetic process;GO:0005975//carbohydrate metabolic process;GO:0005976//polysaccharide metabolic process;GO:0008150//biological_process;GO:0008152//metabolic process;GO:0009058//biosynthetic process;GO:0009059//macromolecule biosynthetic process;GO:0009987//cellular process;GO:0010383//cell wall polysaccharide metabolic process;GO:0010410//hemicellulose metabolic pr…	--
Unigene0001362	21.364	17.092	27.762	47.893	40.3	32.399	YSL1	KAG5593477.1 hypothetical protein H5410_043991 [Solanum commersonii]	-	-	-	-	GO:0005575//cellular_component;GO:0005886//plasma membrane;GO:0016020//membrane;GO:0016021//integral component of membrane;GO:0031224//intrinsic component of membrane;GO:0071944//cell periphery	-	GO:0000003//reproduction;GO:0003006//developmental process involved in reproduction;GO:0006810//transport;GO:0006811//ion transport;GO:0006857//oligopeptide transport;GO:0007275//multicellular organism development;GO:0008150//biological_process;GO:0009791//post-embryonic development;GO:0010035//response to inorganic substance;GO:0010038//response to metal ion;GO:0010039//response to iron ion;GO:0…	--
Unigene0001363	0.375	0.371	0.474	0.2	0.217	0.604	HIPP44	XP_016553916.1 PREDICTED: heavy metal-associated isoprenylated plant protein 22-like [Capsicum annuum]	-	-	-	-	-	GO:0005507//copper ion binding;GO:0045340//mercury ion binding;GO:0046872//metal ion binding	GO:0006825//copper ion transport;GO:0015694//mercury ion transport	--
Unigene0001364	0.48	0	1.011	0	0	0	--	-	-	-	-	-	-	-	-	--
Unigene0001365	0	0	0	0	0	1.325	--	PHT31593.1 Protease Do-like 4, mitochondrial [Capsicum baccatum]	-	-	-	-	-	-	-	--
Unigene0001368	2.277	0.835	1.136	0.631	0	0.181	--	-	-	-	-	-	-	GO:0106073//dolichyl pyrophosphate Glc2Man9GlcNAc2 alpha-1,2-glucosyltransferase activity	GO:0006488//dolichol-linked oligosaccharide biosynthetic process	--
Unigene0001369	0.597	0	0.168	0	0.46	0	--	KAH0676024.1 hypothetical protein KY285_023825 [Solanum tuberosum]	-	-	-	-	-	-	-	--
Unigene0001371	0.17	0.338	0.144	0.364	1.379	0.183	--	-	-	-	-	-	-	-	-	--
Unigene0001372	9.27	9.218	10.747	20.616	26.921	25.3	SDN3	KAH0721818.1 hypothetical protein KY284_006848 [Solanum tuberosum]	Genetic Information Processing	Translation	ko03008//Ribosome biogenesis in eukaryotes	K14570	GO:0005575//cellular_component;GO:0005622//intracellular anatomical structure;GO:0005634//nucleus;GO:0005654//nucleoplasm;GO:0009360//DNA polymerase III complex;GO:0016592//mediator complex;GO:0031974//membrane-enclosed lumen;GO:0031981//nuclear lumen;GO:0032991//protein-containing complex;GO:0043226//organelle;GO:0043227//membrane-bounded organelle;GO:0043229//intracellular organelle;GO:0043231/…	GO:0000175//3'-5'-exoribonuclease activity;GO:0003674//molecular_function;GO:0003676//nucleic acid binding;GO:0003723//RNA binding;GO:0003824//catalytic activity;GO:0003887//DNA-directed DNA polymerase activity;GO:0004518//nuclease activity;GO:0004527//exonuclease activity;GO:0004532//exoribonuclease activity;GO:0004540//ribonuclease activity;GO:0005488//binding;GO:0008408//3'-5' exonuclease acti…	GO:0000459//exonucleolytic trimming involved in rRNA processing;GO:0000460//maturation of 5.8S rRNA;GO:0000466//maturation of 5.8S rRNA from tricistronic rRNA transcript (SSU-rRNA, 5.8S rRNA, LSU-rRNA);GO:0000467//exonucleolytic trimming to generate mature 3'-end of 5.8S rRNA from tricistronic rRNA transcript (SSU-rRNA, 5.8S rRNA, LSU-rRNA);GO:0000469//cleavage involved in rRNA processing;GO:0000…	--
Unigene0001373	0.353	0	0	0.251	0.679	0.252	--	-	-	-	-	-	-	-	-	--
Unigene0001374	0.856	0	0	0.915	0	0	--	-	-	-	-	-	-	-	-	--
Unigene0001376	115.828	110.271	102.231	65.313	63.69	61.211	SP1L1	XP_004239040.1 protein SPIRAL1-like 1 [Solanum lycopersicum]	-	-	-	-	-	-	-	--
Unigene0001377	3.348	2.957	4.266	2.515	1.883	0.777	--	KAF9674352.1 hypothetical protein SADUNF_Sadunf10G0118400 [Salix dunnii]	-	-	-	-	-	-	-	--
Unigene0001378	0	0.994	0	0.751	1.044	0.862	AtMg00170	YP_173450.1 hypothetical protein NitaMp112 [Nicotiana tabacum]	-	-	-	-	-	-	-	--
Unigene0001379	1.701	1.641	1.652	0.42	0.353	0.468	--	-	-	-	-	-	-	GO:0003688//DNA replication origin binding	GO:0006270//DNA replication initiation;GO:0006275//regulation of DNA replication;GO:0016032//viral process	--
Unigene0001380	0.747	0	0.419	0	0	0.267	--	-	-	-	-	-	-	-	-	--
Unigene0001381	1.338	1.472	2.002	1.271	3.092	0.319	--	-	-	-	-	-	-	-	-	--
Unigene0001382	2.15	0.591	1.508	1.66	1.656	0	--	-	-	-	-	-	-	-	-	--
Unigene0001383	3.69	3.145	3.69	1.984	1.525	2.233	At1g56140	XP_016449384.1 PREDICTED: probable LRR receptor-like serine/threonine-protein kinase At1g56140 [Nicotiana tabacum]	-	-	-	-	GO:0005575//cellular_component;GO:0005886//plasma membrane;GO:0016020//membrane;GO:0016021//integral component of membrane;GO:0031224//intrinsic component of membrane;GO:0071944//cell periphery	GO:0000166//nucleotide binding;GO:0003674//molecular_function;GO:0003824//catalytic activity;GO:0004672//protein kinase activity;GO:0004674//protein serine/threonine kinase activity;GO:0005488//binding;GO:0005515//protein binding;GO:0005524//ATP binding;GO:0016301//kinase activity;GO:0016740//transferase activity;GO:0016772//transferase activity, transferring phosphorus-containing groups;GO:00167…	GO:0006464//cellular protein modification process;GO:0006468//protein phosphorylation;GO:0006793//phosphorus metabolic process;GO:0006796//phosphate-containing compound metabolic process;GO:0006807//nitrogen compound metabolic process;GO:0008150//biological_process;GO:0008152//metabolic process;GO:0009987//cellular process;GO:0016310//phosphorylation;GO:0019538//protein metabolic process;GO:00362…	--
Unigene0001384	2.387	1.455	4.019	1.767	1.486	0.789	At1g56140	PHT44078.1 putative LRR receptor-like serine/threonine-protein kinase [Capsicum baccatum]	-	-	-	-	GO:0005575//cellular_component;GO:0005886//plasma membrane;GO:0016020//membrane;GO:0016021//integral component of membrane;GO:0031224//intrinsic component of membrane;GO:0071944//cell periphery	GO:0000166//nucleotide binding;GO:0003674//molecular_function;GO:0003824//catalytic activity;GO:0004672//protein kinase activity;GO:0004674//protein serine/threonine kinase activity;GO:0005488//binding;GO:0005515//protein binding;GO:0005524//ATP binding;GO:0016301//kinase activity;GO:0016740//transferase activity;GO:0016772//transferase activity, transferring phosphorus-containing groups;GO:00167…	GO:0006464//cellular protein modification process;GO:0006468//protein phosphorylation;GO:0006793//phosphorus metabolic process;GO:0006796//phosphate-containing compound metabolic process;GO:0006807//nitrogen compound metabolic process;GO:0008150//biological_process;GO:0008152//metabolic process;GO:0009987//cellular process;GO:0016310//phosphorylation;GO:0019538//protein metabolic process;GO:00362…	--
Unigene0001385	0	0.408	0.926	1.47	0.636	1.919	--	-	-	-	-	-	-	-	-	--
Unigene0001386	0	0	0	0.844	0	0.565	At3g28540	XP_016484592.1 PREDICTED: AAA-ATPase At3g28510-like isoform X3 [Nicotiana tabacum]	-	-	-	-	-	-	-	--
Unigene0001387	0.492	0.65	1.244	0	0	0	--	XP_019252888.1 PREDICTED: uncharacterized protein LOC109231703 [Nicotiana attenuata]	-	-	-	-	-	-	-	--
Unigene0001388	0.529	0.131	1.001	0	0	0	--	XP_019225393.1 PREDICTED: uncharacterized protein LOC109206976 [Nicotiana attenuata]	-	-	-	-	-	-	-	--
Unigene0001390	0	0.489	0.138	0	0	0.706	--	XP_009625034.1 uncharacterized protein LOC104115987 [Nicotiana tomentosiformis]	-	-	-	-	-	-	-	--
Unigene0001391	0.346	0.343	0.583	0	0.6	0	--	XP_019236378.1 PREDICTED: craniofacial development protein 2-like [Nicotiana attenuata]	-	-	-	-	-	-	-	--
Unigene0001392	1.01	0.25	0.213	0	0	0	--	XP_019242262.1 PREDICTED: craniofacial development protein 2-like [Nicotiana attenuata]	-	-	-	-	-	-	-	--
Unigene0001393	5.888	2.253	3.211	3.528	3.196	3.161	bVPE	XP_009771365.1 PREDICTED: vacuolar-processing enzyme beta-isozyme [Nicotiana sylvestris]	-	-	-	-	GO:0000322//storage vacuole;GO:0000325//plant-type vacuole;GO:0000326//protein storage vacuole;GO:0005575//cellular_component;GO:0005622//intracellular anatomical structure;GO:0005737//cytoplasm;GO:0005773//vacuole;GO:0005840//ribosome;GO:0043226//organelle;GO:0043227//membrane-bounded organelle;GO:0043229//intracellular organelle;GO:0043231//intracellular membrane-bounded organelle	GO:0003674//molecular_function;GO:0003735//structural constituent of ribosome;GO:0003824//catalytic activity;GO:0004175//endopeptidase activity;GO:0004197//cysteine-type endopeptidase activity;GO:0004252//serine-type endopeptidase activity;GO:0008233//peptidase activity;GO:0008234//cysteine-type peptidase activity;GO:0016787//hydrolase activity;GO:0140096//catalytic activity, acting on a protein	GO:0006412//translation;GO:0006508//proteolysis;GO:0006624//vacuolar protein processing;GO:0006807//nitrogen compound metabolic process;GO:0008150//biological_process;GO:0008152//metabolic process;GO:0009056//catabolic process;GO:0009057//macromolecule catabolic process;GO:0009987//cellular process;GO:0010467//gene expression;GO:0016485//protein processing;GO:0019538//protein metabolic process;GO…	--
Unigene0001394	0.666	0.44	0	0.475	0	0	--	-	-	-	-	-	-	-	-	--
Unigene0001395	12.3	15.709	16.131	20.769	13.803	15.5	At5g62930	PHT28575.1 GDSL esterase/lipase [Capsicum baccatum]	-	-	-	-	GO:0005575//cellular_component;GO:0005622//intracellular anatomical structure;GO:0005737//cytoplasm;GO:0005829//cytosol	GO:0003674//molecular_function;GO:0003824//catalytic activity;GO:0016787//hydrolase activity;GO:0016788//hydrolase activity, acting on ester bonds	GO:0006629//lipid metabolic process;GO:0008150//biological_process;GO:0008152//metabolic process;GO:0009056//catabolic process;GO:0016042//lipid catabolic process;GO:0044238//primary metabolic process;GO:0071704//organic substance metabolic process;GO:1901575//organic substance catabolic process	--
Unigene0001396	0.304	0.602	0	1.3	0	0	--	XP_016540577.1 PREDICTED: probable disease resistance protein At1g61300 [Capsicum annuum]	Organismal Systems	Environmental adaptation	ko04626//Plant-pathogen interaction	K13459	GO:0016611//iron-iron nitrogenase complex;GO:0016612//molybdenum-iron nitrogenase complex;GO:0016613//vanadium-iron nitrogenase complex	GO:0003723//RNA binding;GO:0003724//RNA helicase activity;GO:0003924//GTPase activity;GO:0005524//ATP binding;GO:0005525//GTP binding;GO:0008134//transcription factor binding;GO:0016163//nitrogenase activity;GO:0016887//ATP hydrolysis activity;GO:0017111//nucleoside-triphosphatase activity;GO:0043531//ADP binding	GO:0002949//tRNA threonylcarbamoyladenosine modification;GO:0006355//regulation of transcription, DNA-templated;GO:0009399//nitrogen fixation	--
Unigene0001397	0.08	0.237	0.202	1.707	1.569	1.714	--	-	-	-	-	-	-	-	-	--
Unigene0001398	11.604	10.164	8.735	7.096	9.091	8.564	rplR	KAG5596520.1 hypothetical protein H5410_037752 [Solanum commersonii]	-	-	-	-	GO:0000315//organellar large ribosomal subunit;GO:0005840//ribosome;GO:0022625//cytosolic large ribosomal subunit	GO:0003676//nucleic acid binding;GO:0003735//structural constituent of ribosome;GO:0004523//RNA-DNA hybrid ribonuclease activity	GO:0006412//translation	--
Unigene0001399	0	0	0	0	0.639	0.593	--	-	-	-	-	-	-	-	-	--
Unigene0001400	0	0.996	0	0	0	0.36	--	-	-	-	-	-	-	-	-	--
Unigene0001403	0.173	0.514	0.729	0	0	0.558	--	-	-	-	-	-	-	-	-	--
Unigene0001404	0	0	0.336	0	0	0	--	-	-	-	-	-	-	-	-	--
Unigene0001405	9.152	9.602	9.723	4.426	2.015	3.158	--	KAG5617316.1 hypothetical protein H5410_017140 [Solanum commersonii]	-	-	-	-	-	GO:0005515//protein binding	-	--
Unigene0001406	5.377	4.542	6.701	2.141	1.401	5.376	--	XP_016481281.1 PREDICTED: uncharacterized protein LOC107802323 [Nicotiana tabacum]	-	-	-	-	-	-	-	--
Unigene0001407	1.25	0.91	3.281	130.541	139.954	115.98	TR1	XP_016569427.1 PREDICTED: tropinone reductase homolog [Capsicum annuum]	Metabolism;Metabolism;Metabolism	Global and overview maps;Global and overview maps;Biosynthesis of other secondary metabolites	ko01100//Metabolic pathways;ko01110//Biosynthesis of secondary metabolites;ko00960//Tropane, piperidine and pyridine alkaloid biosynthesis	K08081;K08081;K08081	-	GO:0003824//catalytic activity;GO:0004316//3-oxoacyl-[acyl-carrier-protein] reductase (NADPH) activity;GO:0004757//sepiapterin reductase activity;GO:0008667//2,3-dihydro-2,3-dihydroxybenzoate dehydrogenase activity;GO:0008678//2-deoxy-D-gluconate 3-dehydrogenase activity;GO:0016491//oxidoreductase activity;GO:0016630//protochlorophyllide reductase activity;GO:0051287//NAD binding	GO:0000272//polysaccharide catabolic process;GO:0006633//fatty acid biosynthetic process;GO:0006729//tetrahydrobiopterin biosynthetic process;GO:0015995//chlorophyll biosynthetic process	--
Unigene0001408	0	0	0	0.216	0	0.217	--	-	-	-	-	-	-	-	-	--
Unigene0001409	0	0	0	0.43	0	0	--	-	-	-	-	-	-	-	-	--
Unigene0001411	17.972	16.561	18.134	27.521	25.97	27.35	EDR1	KAH0767948.1 hypothetical protein KY285_003819 [Solanum tuberosum]	-	-	-	-	-	GO:0000155//phosphorelay sensor kinase activity;GO:0004672//protein kinase activity;GO:0005515//protein binding;GO:0005524//ATP binding;GO:0030298//receptor signaling protein tyrosine kinase activator activity;GO:0030971//receptor tyrosine kinase binding	GO:0000160//phosphorelay signal transduction system;GO:0006355//regulation of transcription, DNA-templated;GO:0006468//protein phosphorylation;GO:0006796//phosphate-containing compound metabolic process;GO:0006817//phosphate ion transport;GO:0007165//signal transduction	--
Unigene0001412	5.812	3.069	3.425	1.657	0.896	0.832	CTR1	VAI14036.1 unnamed protein product [Triticum turgidum subsp. durum] [Triticum turgidum]	-	-	-	-	-	GO:0004672//protein kinase activity;GO:0005524//ATP binding	GO:0006355//regulation of transcription, DNA-templated;GO:0006468//protein phosphorylation	--
Unigene0001413	7.171	4.734	5.584	3.258	2.279	1.989	--	XP_004252926.1 RGS domain-containing serine/threonine-protein kinase A-like isoform X1 [Solanum lycopersicum]	Metabolism;Metabolism	Global and overview maps;Amino acid metabolism	ko01100//Metabolic pathways;ko00270//Cysteine and methionine metabolism	K00558;K00558	-	-	-	--
Unigene0001414	35.844	29.562	31.867	12.559	14.584	12.319	--	TMW97425.1 hypothetical protein EJD97_005547 [Solanum chilense]	-	-	-	-	-	GO:0000155//phosphorelay sensor kinase activity;GO:0005515//protein binding	GO:0000160//phosphorelay signal transduction system;GO:0006355//regulation of transcription, DNA-templated;GO:0006796//phosphate-containing compound metabolic process;GO:0006817//phosphate ion transport;GO:0007165//signal transduction	--
Unigene0001416	0.184	0.364	0.31	0	0.213	0.198	RXLR161	KAH0705054.1 hypothetical protein KY289_010130 [Solanum tuberosum]	-	-	-	-	GO:0005789//endoplasmic reticulum membrane	-	GO:0006888//endoplasmic reticulum to Golgi vesicle-mediated transport	--
Unigene0001417	0	0	0	0	0	0.676	--	-	-	-	-	-	-	-	-	--
Unigene0001418	7.951	7.505	9.147	0.85	1.041	1.195	--	-	-	-	-	-	-	-	-	--
Unigene0001419	0.273	1.351	0.536	0	0	0	--	-	-	-	-	-	-	-	-	--
Unigene0001420	0.37	0.366	0.778	0.395	0	0	--	-	-	-	-	-	-	-	-	--
Unigene0001421	0.88	1.743	1.111	0.314	0	0.63	--	-	-	-	-	-	-	-	-	--
Unigene0001422	0.955	0.473	0.804	0.17	0	0.171	--	-	-	-	-	-	-	-	-	--
Unigene0001423	1.323	0.983	0.418	0.354	0.382	0.355	--	-	-	-	-	-	-	-	-	--
Unigene0001424	4.915	5.822	5.143	3.339	3.451	4.339	truA	KAF3680448.1 putative bromodomain-containing factor 2-like [Capsicum annuum]	-	-	-	-	-	GO:0003674//molecular_function;GO:0003676//nucleic acid binding;GO:0003723//RNA binding;GO:0003824//catalytic activity;GO:0005488//binding;GO:0009982//pseudouridine synthase activity;GO:0016853//isomerase activity;GO:0016866//intramolecular transferase activity;GO:0097159//organic cyclic compound binding;GO:0106029//tRNA pseudouridine synthase activity;GO:0140098//catalytic activity, acting on RN…	GO:0001522//pseudouridine synthesis;GO:0006139//nucleobase-containing compound metabolic process;GO:0006396//RNA processing;GO:0006399//tRNA metabolic process;GO:0006400//tRNA modification;GO:0006725//cellular aromatic compound metabolic process;GO:0006807//nitrogen compound metabolic process;GO:0008033//tRNA processing;GO:0008150//biological_process;GO:0008152//metabolic process;GO:0009451//RNA …	--
Unigene0001425	1.033	0	0	0	0	0	--	-	-	-	-	-	-	-	-	--
Unigene0001426	0.433	0.321	0.091	0	0.375	0	--	XP_009353751.1 PREDICTED: uncharacterized protein LOC103944983 isoform X1 [Pyrus x bretschneideri]	-	-	-	-	-	GO:0009982//pseudouridine synthase activity	GO:0006400//tRNA modification	--
Unigene0001427	0.24	0.951	0.404	0	0	1.289	--	-	-	-	-	-	-	-	-	--
Unigene0001428	9.046	8.958	11.552	8.829	6.97	6.052	2024-10-07	XP_016562336.1 PREDICTED: organic cation/carnitine transporter 7 isoform X1 [Capsicum annuum]	-	-	-	-	GO:0005575//cellular_component;GO:0005886//plasma membrane;GO:0005887//integral component of plasma membrane;GO:0016020//membrane;GO:0016021//integral component of membrane;GO:0031224//intrinsic component of membrane;GO:0071944//cell periphery	GO:0000166//nucleotide binding;GO:0003674//molecular_function;GO:0005215//transporter activity;GO:0005342//organic acid transmembrane transporter activity;GO:0005488//binding;GO:0005524//ATP binding;GO:0008028//monocarboxylic acid transmembrane transporter activity;GO:0008324//cation transmembrane transporter activity;GO:0008509//anion transmembrane transporter activity;GO:0008514//organic anion …	GO:0006810//transport;GO:0006811//ion transport;GO:0006812//cation transport;GO:0006817//phosphate ion transport;GO:0006820//anion transport;GO:0006855//xenobiotic transmembrane transport;GO:0008150//biological_process;GO:0008643//carbohydrate transport;GO:0015689//molybdate ion transport;GO:0015695//organic cation transport;GO:0015696//ammonium transport;GO:0015697//quaternary ammonium group tra…	--
Unigene0001430	9.258	10.2	9.001	22.022	21.701	23.796	VHA-e1	KAH0736357.1 hypothetical protein KY285_012064 [Solanum tuberosum]	Metabolism;Metabolism;Cellular Processes	Global and overview maps;Energy metabolism;Transport and catabolism	ko01100//Metabolic pathways;ko00190//Oxidative phosphorylation;ko04145//Phagosome	K02153;K02153;K02153	GO:0033179//proton-transporting V-type ATPase, V0 domain	GO:0015078//proton transmembrane transporter activity	GO:1902600//proton transmembrane transport	--
Unigene0001432	0	0.544	0	0.587	0	0.59	--	-	-	-	-	-	-	-	-	--
Unigene0001433	0	0.353	0	0	0	0	--	-	-	-	-	-	-	-	-	--
Unigene0001434	2.424	2.252	2.023	0.321	0.273	0.438	--	KAF3635461.1 putative Signal recognition particle receptor subunit beta [Capsicum annuum]	-	-	-	-	-	-	-	--
Unigene0001435	0.579	0.43	0.883	0.89	1.004	0.466	--	XP_016554772.1 PREDICTED: mitogen-activated protein kinase kinase kinase 2-like [Capsicum annuum]	-	-	-	-	-	GO:0004672//protein kinase activity;GO:0005524//ATP binding	GO:0006468//protein phosphorylation	--
Unigene0001437	2.703	2.453	2.971	10.032	10.066	6.891	LECRK91	PHT59275.1 hypothetical protein CQW23_01638 [Capsicum baccatum]	-	-	-	-	GO:0016020//membrane	GO:0004672//protein kinase activity;GO:0005524//ATP binding;GO:0030246//carbohydrate binding	GO:0006468//protein phosphorylation	--
Unigene0001438	3.907	3.267	3.512	1.176	0.526	1.425	LECRK91	AKV93687.1 clade XVII lectin receptor kinase [Nicotiana benthamiana]	-	-	-	-	-	GO:0004672//protein kinase activity;GO:0005524//ATP binding;GO:0030246//carbohydrate binding	GO:0006468//protein phosphorylation;GO:0070072//vacuolar proton-transporting V-type ATPase complex assembly	--
Unigene0001439	0	0	0	0.44	0	0	--	-	-	-	-	-	-	-	-	--
Unigene0001440	4.125	4.836	5.235	61.83	49.184	37.576	SYNC2	XP_019260863.1 PREDICTED: asparagine--tRNA ligase, cytoplasmic 2 [Nicotiana attenuata]	Genetic Information Processing	Translation	ko00970//Aminoacyl-tRNA biosynthesis	K01893	GO:0005575//cellular_component;GO:0005622//intracellular anatomical structure;GO:0005737//cytoplasm;GO:0005739//mitochondrion;GO:0005829//cytosol;GO:0009507//chloroplast;GO:0009536//plastid;GO:0043226//organelle;GO:0043227//membrane-bounded organelle;GO:0043229//intracellular organelle;GO:0043231//intracellular membrane-bounded organelle	GO:0000166//nucleotide binding;GO:0003674//molecular_function;GO:0003824//catalytic activity;GO:0004812//aminoacyl-tRNA ligase activity;GO:0004815//aspartate-tRNA ligase activity;GO:0004816//asparagine-tRNA ligase activity;GO:0004824//lysine-tRNA ligase activity;GO:0005488//binding;GO:0005524//ATP binding;GO:0016874//ligase activity;GO:0016875//ligase activity, forming carbon-oxygen bonds;GO:0017…	GO:0006082//organic acid metabolic process;GO:0006139//nucleobase-containing compound metabolic process;GO:0006399//tRNA metabolic process;GO:0006412//translation;GO:0006418//tRNA aminoacylation for protein translation;GO:0006421//asparaginyl-tRNA aminoacylation;GO:0006422//aspartyl-tRNA aminoacylation;GO:0006430//lysyl-tRNA aminoacylation;GO:0006518//peptide metabolic process;GO:0006520//cellula…	--
Unigene0001441	3.532	2.623	1.734	2.989	4.422	2.212	ZPR1	KAH0641435.1 hypothetical protein KY289_032409 [Solanum tuberosum]	-	-	-	-	-	-	-	--
Unigene0001442	0.448	1.774	3.111	0.239	1.812	1.683	SAPK6	ONM36092.1 Serine/threonine-protein kinase SRK2A [Zea mays]	Environmental Information Processing;Environmental Information Processing	Signal transduction;Signal transduction	ko04075//Plant hormone signal transduction;ko04016//MAPK signaling pathway - plant	K14498;K14498	GO:0005849//mRNA cleavage factor complex	GO:0004672//protein kinase activity;GO:0005524//ATP binding	GO:0006369//termination of RNA polymerase II transcription;GO:0006378//mRNA polyadenylation;GO:0006379//mRNA cleavage;GO:0006468//protein phosphorylation	--
Unigene0001445	0	0	0.125	4.441	0.343	3.345	--	-	-	-	-	-	-	-	-	--
Unigene0001446	0	0	0	0	0.461	0	CERK1	XP_019255540.1 PREDICTED: lysM domain receptor-like kinase 3 isoform X2 [Nicotiana attenuata]	Organismal Systems	Environmental adaptation	ko04626//Plant-pathogen interaction	K13429	-	-	-	--
Unigene0001447	2.984	4.277	3.338	0.378	0.363	0.337	IQD11	PHU14047.1 Protein IQ-DOMAIN 31 [Capsicum chinense]	-	-	-	-	-	GO:0005515//protein binding	-	--
Unigene0001448	15.097	15.313	16.561	16.816	19.61	17.211	ddx46	KAH0641060.1 hypothetical protein KY285_037646 [Solanum tuberosum]	Genetic Information Processing	Transcription	ko03040//Spliceosome	K12823	GO:0005575//cellular_component;GO:0005622//intracellular anatomical structure;GO:0005634//nucleus;GO:0005737//cytoplasm;GO:0009380//excinuclease repair complex;GO:0043226//organelle;GO:0043227//membrane-bounded organelle;GO:0043229//intracellular organelle;GO:0043231//intracellular membrane-bounded organelle	GO:0000166//nucleotide binding;GO:0003674//molecular_function;GO:0003676//nucleic acid binding;GO:0003677//DNA binding;GO:0003723//RNA binding;GO:0003724//RNA helicase activity;GO:0003824//catalytic activity;GO:0004386//helicase activity;GO:0005488//binding;GO:0005524//ATP binding;GO:0008186//ATP-dependent activity, acting on RNA;GO:0009381//excinuclease ABC activity;GO:0016462//pyrophosphatase a…	GO:0000184//nuclear-transcribed mRNA catabolic process, nonsense-mediated decay;GO:0000956//nuclear-transcribed mRNA catabolic process;GO:0006139//nucleobase-containing compound metabolic process;GO:0006268//DNA unwinding involved in DNA replication;GO:0006281//DNA repair;GO:0006289//nucleotide-excision repair;GO:0006310//DNA recombination;GO:0006364//rRNA processing;GO:0006396//RNA processing;GO…	--
Unigene0001449	0	0	0.212	0.538	0	0	--	XP_016544500.1 PREDICTED: uncharacterized protein LOC107844647 [Capsicum annuum]	-	-	-	-	-	-	-	--
Unigene0001450	0.772	0.127	1.517	0.138	0	0.138	--	XP_019231424.1 PREDICTED: DEAD-box ATP-dependent RNA helicase 52A-like [Nicotiana attenuata]	Genetic Information Processing	Transcription	ko03040//Spliceosome	K12823	-	-	GO:0006310//DNA recombination	--
Unigene0001451	1.283	0.181	0.926	0.588	0.424	0.59	--	-	-	-	-	-	-	GO:0004222//metalloendopeptidase activity;GO:0008270//zinc ion binding	GO:0019058//viral life cycle	--
Unigene0001452	0.17	0.168	0.143	0.363	1.178	0.182	--	-	-	-	-	-	-	-	-	--
Unigene0001453	0	0.182	0.155	0.589	0.212	0	--	-	-	-	-	-	-	-	-	--
Unigene0001454	0.27	0.401	0.341	0.577	0.78	0	--	-	-	-	-	-	-	-	-	--
Unigene0001455	0	0.342	0	0	0	0	--	-	-	-	-	-	-	-	-	--
Unigene0001456	0.809	0	0.17	0	0	0	--	-	-	-	-	-	-	-	-	--
Unigene0001457	8.012	7.818	9.084	8.935	8.545	8.061	U2AF65A	TMW99291.1 hypothetical protein EJD97_002778 [Solanum chilense]	Genetic Information Processing	Transcription	ko03040//Spliceosome	K12837	-	GO:0003676//nucleic acid binding	GO:0008380//RNA splicing	--
Unigene0001458	0	0	0	0	0.838	0	--	-	-	-	-	-	-	-	-	--
Unigene0001459	12.634	10.874	13.138	15.799	17.082	17.861	--	XP_009776009.1 PREDICTED: bromodomain-containing protein DDB_G0280777 [Nicotiana sylvestris]	-	-	-	-	-	-	-	--
Unigene0001461	0.948	0.845	0.798	0	0.219	0.102	--	-	-	-	-	-	-	-	-	--
Unigene0001463	31.602	26.676	25.482	40.571	40.596	36.217	STOP1	XP_009624046.1 protein SENSITIVE TO PROTON RHIZOTOXICITY 1-like isoform X1 [Nicotiana tomentosiformis]	-	-	-	-	-	-	-	--
Unigene0001464	17.995	21.936	21.103	11.923	13.88	12.725	IQD13	PHT40146.1 Protein IQ-DOMAIN 14 [Capsicum baccatum]	-	-	-	-	-	GO:0005515//protein binding	-	--
Unigene0001465	0.461	0.685	0.194	0	0.8	0	--	-	-	-	-	-	-	-	-	--
Unigene0001466	8.194	4.474	7.097	0.649	0.273	0.253	--	XP_019244434.1 PREDICTED: uncharacterized protein LOC109224303 [Nicotiana attenuata]	-	-	-	-	-	-	-	--
Unigene0001467	0.39	0.386	0.657	0	0	0	--	PHT60655.1 Eukaryotic translation initiation factor 4G [Capsicum baccatum]	-	-	-	-	-	-	-	--
Unigene0001468	15.195	16.268	16.947	15.013	18.25	12.702	--	XP_009590588.1 uncharacterized protein LOC104087736 [Nicotiana tomentosiformis]	-	-	-	-	GO:0005634//nucleus;GO:0045203//integral component of cell outer membrane	GO:0005215//transporter activity;GO:0005515//protein binding	GO:0006397//mRNA processing;GO:0015774//polysaccharide transport;GO:0042710//biofilm formation	--
Unigene0001470	0	0	1.387	0	0	0	--	-	-	-	-	-	-	GO:0016817//hydrolase activity, acting on acid anhydrides	-	--
Unigene0001471	0	0	0	0.108	0.116	0.648	--	-	-	-	-	-	-	-	-	--
Unigene0001473	2.616	2.989	1.694	0.645	0.349	0.432	--	-	-	-	-	-	-	-	GO:0007165//signal transduction	--
Unigene0001474	1.777	2.165	0.805	0.146	0.474	0.587	--	-	-	-	-	-	-	-	GO:0007165//signal transduction	--
Unigene0001475	17.326	16.073	20.556	16.596	23.817	20.114	SUVH1	NP_001311665.1 histone-lysine N-methyltransferase, H3 lysine-9 specific SUVH1 [Nicotiana tabacum]	Metabolism;Metabolism	Global and overview maps;Amino acid metabolism	ko01100//Metabolic pathways;ko00310//Lysine degradation	K24405;K24405	GO:0005634//nucleus	GO:0005515//protein binding;GO:0008270//zinc ion binding;GO:0018024//histone-lysine N-methyltransferase activity	GO:0034968//histone lysine methylation	--
Unigene0001476	2.904	2.234	3.774	1.326	1.89	1.15	--	RVW36816.1 Succinate-semialdehyde dehydrogenase, mitochondrial [Vitis vinifera]	-	-	-	-	-	-	-	--
Unigene0001477	23.97	20.762	24.179	23.75	25.363	26.219	SUVH1	XP_004249103.1 histone-lysine N-methyltransferase, H3 lysine-9 specific SUVH1 [Solanum lycopersicum]	Metabolism;Metabolism	Global and overview maps;Amino acid metabolism	ko01100//Metabolic pathways;ko00310//Lysine degradation	K24405;K24405	GO:0005634//nucleus	GO:0005515//protein binding;GO:0008270//zinc ion binding;GO:0018024//histone-lysine N-methyltransferase activity	GO:0034968//histone lysine methylation	--
Unigene0001478	2.755	1.364	2.418	1.935	1.774	1.774	--	-	-	-	-	-	-	-	-	--
Unigene0001479	0.675	1.203	1.023	0.144	0.78	0.145	--	-	-	-	-	-	-	-	-	--
Unigene0001480	1.128	0.558	0.844	0.536	0.869	0.538	--	-	-	-	-	-	-	-	-	--
Unigene0001481	103.71	77.279	105.51	110.857	88.21	83.378	SPAC167.05	XP_016542378.1 PREDICTED: uncharacterized protein C167.05-like [Capsicum annuum]	-	-	-	-	-	-	-	--
Unigene0001483	6.06	6.298	5.825	9.188	11.673	9.504	ORC2	KAH0749858.1 hypothetical protein KY290_029090 [Solanum tuberosum]	-	-	-	-	GO:0000228//nuclear chromosome;GO:0000808//origin recognition complex;GO:0005575//cellular_component;GO:0005622//intracellular anatomical structure;GO:0005634//nucleus;GO:0005664//nuclear origin of replication recognition complex;GO:0005694//chromosome;GO:0031974//membrane-enclosed lumen;GO:0031981//nuclear lumen;GO:0032991//protein-containing complex;GO:0043226//organelle;GO:0043227//membrane-bo…	GO:0003674//molecular_function;GO:0003676//nucleic acid binding;GO:0003677//DNA binding;GO:0003688//DNA replication origin binding;GO:0003690//double-stranded DNA binding;GO:0005488//binding;GO:0043565//sequence-specific DNA binding;GO:0097159//organic cyclic compound binding;GO:1901363//heterocyclic compound binding;GO:1990837//sequence-specific double-stranded DNA binding	GO:0006139//nucleobase-containing compound metabolic process;GO:0006259//DNA metabolic process;GO:0006260//DNA replication;GO:0006725//cellular aromatic compound metabolic process;GO:0006807//nitrogen compound metabolic process;GO:0008150//biological_process;GO:0008152//metabolic process;GO:0009058//biosynthetic process;GO:0009059//macromolecule biosynthetic process;GO:0009987//cellular process;G…	--
Unigene0001484	0	0.641	0.856	0.395	0.321	0.397	--	-	-	-	-	-	-	-	-	--
Unigene0001485	0.447	0.443	0.377	0.717	0.259	0.48	--	-	-	-	-	-	-	-	-	--
Unigene0001486	20.604	23.523	25.043	20.569	18.57	17.761	SEC8	KAH0716125.1 hypothetical protein KY284_009030 [Solanum tuberosum]	-	-	-	-	GO:0000145//exocyst;GO:0005575//cellular_component;GO:0005576//extracellular region;GO:0005615//extracellular space;GO:0005618//cell wall;GO:0005622//intracellular anatomical structure;GO:0005737//cytoplasm;GO:0005829//cytosol;GO:0005856//cytoskeleton;GO:0005886//plasma membrane;GO:0005911//cell-cell junction;GO:0005938//cell cortex;GO:0009506//plasmodesma;GO:0009524//phragmoplast;GO:0016020//mem…	-	GO:0000003//reproduction;GO:0003006//developmental process involved in reproduction;GO:0006605//protein targeting;GO:0006612//protein targeting to membrane;GO:0006810//transport;GO:0006886//intracellular protein transport;GO:0006887//exocytosis;GO:0006892//post-Golgi vesicle-mediated transport;GO:0006893//Golgi to plasma membrane transport;GO:0006903//vesicle targeting;GO:0006904//vesicle docking…	--
Unigene0001487	0	1.915	0.465	0	0	0	--	-	-	-	-	-	-	-	-	--
Unigene0001488	15.415	19.928	17.611	4.839	4.171	3.283	VIT_05s0020g02800	XP_019263797.1 PREDICTED: ATP-dependent (S)-NAD(P)H-hydrate dehydratase [Nicotiana attenuata]	-	-	-	-	GO:0005575//cellular_component;GO:0005622//intracellular anatomical structure;GO:0005737//cytoplasm;GO:0005739//mitochondrion;GO:0005829//cytosol;GO:0009507//chloroplast;GO:0009536//plastid;GO:0043226//organelle;GO:0043227//membrane-bounded organelle;GO:0043229//intracellular organelle;GO:0043231//intracellular membrane-bounded organelle	GO:0000166//nucleotide binding;GO:0003674//molecular_function;GO:0003824//catalytic activity;GO:0005488//binding;GO:0005524//ATP binding;GO:0009024//tagatose-6-phosphate kinase activity;GO:0016829//lyase activity;GO:0016835//carbon-oxygen lyase activity;GO:0016836//hydro-lyase activity;GO:0016853//isomerase activity;GO:0016854//racemase and epimerase activity;GO:0017076//purine nucleotide binding…	GO:0005990//lactose catabolic process;GO:0006139//nucleobase-containing compound metabolic process;GO:0006725//cellular aromatic compound metabolic process;GO:0006734//NADH metabolic process;GO:0006739//NADP metabolic process;GO:0006753//nucleoside phosphate metabolic process;GO:0006793//phosphorus metabolic process;GO:0006796//phosphate-containing compound metabolic process;GO:0006807//nitrogen …	--
Unigene0001489	6.732	9.305	6.73	23.311	26.421	18.292	RAD51	NP_001233788.1 DNA repair protein RAD51 homolog [Solanum lycopersicum]	Genetic Information Processing	Replication and repair	ko03440//Homologous recombination	K04482	GO:0000228//nuclear chromosome;GO:0000775//chromosome, centromeric region;GO:0000781//chromosome, telomeric region;GO:0000785//chromatin;GO:0000793//condensed chromosome;GO:0000794//condensed nuclear chromosome;GO:0000795//synaptonemal complex;GO:0000800//lateral element;GO:0005575//cellular_component;GO:0005622//intracellular anatomical structure;GO:0005634//nucleus;GO:0005654//nucleoplasm;GO:00…	GO:0000150//DNA strand exchange activity;GO:0000166//nucleotide binding;GO:0000217//DNA secondary structure binding;GO:0000400//four-way junction DNA binding;GO:0003674//molecular_function;GO:0003676//nucleic acid binding;GO:0003677//DNA binding;GO:0003678//DNA helicase activity;GO:0003682//chromatin binding;GO:0003690//double-stranded DNA binding;GO:0003697//single-stranded DNA binding;GO:000382…	GO:0000003//reproduction;GO:0000018//regulation of DNA recombination;GO:0000278//mitotic cell cycle;GO:0000280//nuclear division;GO:0000709//meiotic joint molecule formation;GO:0000722//telomere maintenance via recombination;GO:0000723//telomere maintenance;GO:0000724//double-strand break repair via homologous recombination;GO:0000725//recombinational repair;GO:0000730//DNA recombinase assembly;G…	--
Unigene0001490	0.256	0	0	0	0	0	--	-	-	-	-	-	-	-	-	--
Unigene0001492	27.238	19.412	26.237	45.522	46.843	51.355	OBE4	KAH0726098.1 hypothetical protein KY284_001963 [Solanum tuberosum]	-	-	-	-	GO:0005575//cellular_component;GO:0005622//intracellular anatomical structure;GO:0005634//nucleus;GO:0043226//organelle;GO:0043227//membrane-bounded organelle;GO:0043229//intracellular organelle;GO:0043231//intracellular membrane-bounded organelle	GO:0003674//molecular_function;GO:0005488//binding;GO:0043167//ion binding;GO:0043169//cation binding;GO:0046872//metal ion binding	GO:0001708//cell fate specification;GO:0007275//multicellular organism development;GO:0007389//pattern specification process;GO:0008150//biological_process;GO:0009653//anatomical structure morphogenesis;GO:0009790//embryo development;GO:0009880//embryonic pattern specification;GO:0009888//tissue development;GO:0009933//meristem structural organization;GO:0009987//cellular process;GO:0010014//meri…	--
Unigene0001493	0.19	0.377	0.24	0.509	1.21	0.613	--	-	-	-	-	-	-	-	-	--
Unigene0001494	0.884	0.963	3.022	0.548	0.47	0.873	RE1	XP_019244426.1 PREDICTED: uncharacterized protein LOC109224292 [Nicotiana attenuata]	-	-	-	-	GO:0000312//plastid small ribosomal subunit;GO:0000315//organellar large ribosomal subunit;GO:0005840//ribosome;GO:0022625//cytosolic large ribosomal subunit;GO:0022627//cytosolic small ribosomal subunit	GO:0003735//structural constituent of ribosome	GO:0006412//translation	--
Unigene0001495	0.776	0.659	1.307	0	0	0.238	--	-	-	-	-	-	-	-	-	--
Unigene0001496	0	0.256	0.218	0	0	0	--	KAH0682730.1 hypothetical protein KY289_020482 [Solanum tuberosum]	-	-	-	-	-	-	-	--
Unigene0001497	1.452	0.288	0.367	0.155	0.168	0.779	--	-	-	-	-	-	-	-	-	--
Unigene0001498	1.238	1.255	1.144	0.678	0.454	0.292	--	XP_016434773.1 PREDICTED: uncharacterized protein LOC107761115 [Nicotiana tabacum]	-	-	-	-	-	-	-	--
Unigene0001499	0.387	0.287	0.244	0.413	0.335	0.415	--	XP_016434773.1 PREDICTED: uncharacterized protein LOC107761115 [Nicotiana tabacum]	-	-	-	-	-	-	-	--
Unigene0001500	0.913	0.151	0.769	0	0.176	0.327	--	KAG5580792.1 hypothetical protein H5410_051419 [Solanum commersonii]	-	-	-	-	-	-	-	--
Unigene0001501	0	0	0.159	0	0	0.404	TOM40-1	KAE9597522.1 putative eukaryotic porin/Tom40 [Lupinus albus]	-	-	-	-	GO:0005741//mitochondrial outer membrane	-	GO:0055085//transmembrane transport	--
Unigene0001502	0.19	0	0.16	0	0	0	--	-	-	-	-	-	GO:0005741//mitochondrial outer membrane	-	GO:0055085//transmembrane transport	--
Unigene0001503	4.381	4.717	4.303	11.782	12.177	8.846	TOM40-1	XP_009766087.1 PREDICTED: mitochondrial import receptor subunit TOM40-1-like [Nicotiana sylvestris]	-	-	-	-	GO:0005741//mitochondrial outer membrane	-	GO:0055085//transmembrane transport	--
Unigene0001504	4.216	5.973	4.86	17.402	22.789	17.546	TOM40-1	XP_015077404.1 mitochondrial import receptor subunit TOM40-1-like [Solanum pennellii]	-	-	-	-	GO:0005741//mitochondrial outer membrane;GO:0032865//ERMES complex	-	GO:0007005//mitochondrion organization;GO:0055085//transmembrane transport	--
Unigene0001505	0.442	0.219	0	0.708	0	0	--	XP_016499864.1 PREDICTED: putative pentatricopeptide repeat-containing protein At1g12700, mitochondrial [Nicotiana tabacum]	-	-	-	-	-	-	-	--
Unigene0001506	10.881	13.229	12.58	11.336	11.859	12.937	CRF5	XP_006362748.1 PREDICTED: ethylene-responsive transcription factor 5-like [Solanum tuberosum]	-	-	-	-	-	GO:0003700//DNA-binding transcription factor activity;GO:0005515//protein binding	GO:0006355//regulation of transcription, DNA-templated	AP2
Unigene0001507	5.509	6.714	7.135	6.644	3.755	3.184	--	KAF3671319.1 putative protein kinase 2B, chloroplastic-like [Capsicum annuum]	-	-	-	-	-	GO:0003700//DNA-binding transcription factor activity	GO:0006355//regulation of transcription, DNA-templated	--
Unigene0001508	2.429	1.833	1.948	0.247	0.267	1.242	CRF4	KAF3671319.1 putative protein kinase 2B, chloroplastic-like [Capsicum annuum]	-	-	-	-	-	GO:0003700//DNA-binding transcription factor activity	GO:0006355//regulation of transcription, DNA-templated	ERF
Unigene0001509	1.041	1.031	0.803	0.185	0	0	--	-	-	-	-	-	-	-	-	--
Unigene0001510	0.636	0.18	0.765	1.166	1.05	1.366	--	-	-	-	-	-	-	-	-	--
Unigene0001511	15.795	18.331	12.582	12.889	9.618	9.116	--	KAH0670806.1 hypothetical protein KY289_025299 [Solanum tuberosum]	-	-	-	-	-	-	-	--
Unigene0001512	1.328	2.089	1.908	0.835	1.897	0.755	--	-	-	-	-	-	-	-	-	--
Unigene0001513	54.767	70.581	74.931	247.906	250.413	240.526	At3g13930	KAH0652236.1 hypothetical protein KY289_029914 [Solanum tuberosum]	Metabolism;Metabolism;Metabolism;Metabolism;Metabolism;Metabolism	Global and overview maps;Global and overview maps;Global and overview maps;Carbohydrate metabolism;Carbohydrate metabolism;Carbohydrate metabolism	ko01100//Metabolic pathways;ko01110//Biosynthesis of secondary metabolites;ko01200//Carbon metabolism;ko00010//Glycolysis / Gluconeogenesis;ko00620//Pyruvate metabolism;ko00020//Citrate cycle (TCA cycle)	K00627;K00627;K00627;K00627;K00627;K00627	GO:0005575//cellular_component;GO:0005622//intracellular anatomical structure;GO:0005737//cytoplasm;GO:0005739//mitochondrion;GO:0005759//mitochondrial matrix;GO:0005967//mitochondrial pyruvate dehydrogenase complex;GO:0031974//membrane-enclosed lumen;GO:0032991//protein-containing complex;GO:0043226//organelle;GO:0043227//membrane-bounded organelle;GO:0043229//intracellular organelle;GO:0043231/…	GO:0003674//molecular_function;GO:0003824//catalytic activity;GO:0004149//dihydrolipoyllysine-residue succinyltransferase activity;GO:0004738//pyruvate dehydrogenase activity;GO:0004742//dihydrolipoyllysine-residue acetyltransferase activity;GO:0016407//acetyltransferase activity;GO:0016417//S-acyltransferase activity;GO:0016418//S-acetyltransferase activity;GO:0016740//transferase activity;GO:00…	GO:0005975//carbohydrate metabolic process;GO:0006082//organic acid metabolic process;GO:0006084//acetyl-CoA metabolic process;GO:0006085//acetyl-CoA biosynthetic process;GO:0006086//acetyl-CoA biosynthetic process from pyruvate;GO:0006090//pyruvate metabolic process;GO:0006091//generation of precursor metabolites and energy;GO:0006096//glycolytic process;GO:0006099//tricarboxylic acid cycle;GO:0…	--
Unigene0001514	5.452	6.896	8.145	28.768	33.144	29.703	At2g37230	XP_004251992.1 pentatricopeptide repeat-containing protein At2g37230 [Solanum lycopersicum]	-	-	-	-	GO:0005575//cellular_component;GO:0005622//intracellular anatomical structure;GO:0005737//cytoplasm;GO:0009507//chloroplast;GO:0009534//chloroplast thylakoid;GO:0009535//chloroplast thylakoid membrane;GO:0009536//plastid;GO:0009579//thylakoid;GO:0016020//membrane;GO:0031976//plastid thylakoid;GO:0031984//organelle subcompartment;GO:0034357//photosynthetic membrane;GO:0042651//thylakoid membrane;G…	GO:0003674//molecular_function;GO:0003676//nucleic acid binding;GO:0003723//RNA binding;GO:0003729//mRNA binding;GO:0003824//catalytic activity;GO:0004518//nuclease activity;GO:0004519//endonuclease activity;GO:0005488//binding;GO:0005506//iron ion binding;GO:0016705//oxidoreductase activity, acting on paired donors, with incorporation or reduction of molecular oxygen;GO:0016787//hydrolase activi…	GO:0006139//nucleobase-containing compound metabolic process;GO:0006725//cellular aromatic compound metabolic process;GO:0006807//nitrogen compound metabolic process;GO:0006950//response to stress;GO:0008150//biological_process;GO:0008152//metabolic process;GO:0009266//response to temperature stimulus;GO:0009409//response to cold;GO:0009451//RNA modification;GO:0009628//response to abiotic stimul…	--
Unigene0001515	0.797	0.623	0.424	184.407	168.368	183.89	CYP71D55	PHT34787.1 5-epiaristolochene 1,3-dihydroxylase [Capsicum baccatum]	-	-	-	-	-	GO:0005506//iron ion binding;GO:0016705//oxidoreductase activity, acting on paired donors, with incorporation or reduction of molecular oxygen;GO:0020037//heme binding	-	--
Unigene0001516	11.441	10.434	11.072	19.917	18.379	21.014	PAH1	XP_006345678.1 PREDICTED: phosphatidate phosphatase PAH1-like isoform X2 [Solanum tuberosum]	Metabolism;Metabolism;Metabolism;Metabolism	Global and overview maps;Global and overview maps;Lipid metabolism;Lipid metabolism	ko01100//Metabolic pathways;ko01110//Biosynthesis of secondary metabolites;ko00564//Glycerophospholipid metabolism;ko00561//Glycerolipid metabolism	K15728;K15728;K15728;K15728	-	-	-	--
Unigene0001518	20.704	18.181	22.996	22.543	23.892	18.539	VPS35A	PHU19347.1 Vacuolar protein sorting-associated protein 35A [Capsicum chinense]	Cellular Processes	Transport and catabolism	ko04144//Endocytosis	K18468	-	-	-	--
Unigene0001519	11.827	10.907	12.667	13.253	12.243	12.987	VPS35A	XP_004232510.1 vacuolar protein sorting-associated protein 35A [Solanum lycopersicum]	Cellular Processes	Transport and catabolism	ko04144//Endocytosis	K18468	-	-	-	--
Unigene0001520	0	0.399	0	0	0	0	--	-	-	-	-	-	-	-	-	--
Unigene0001521	0.658	0.163	0.277	0.352	1.14	0.53	VPS35A	XP_006343354.1 PREDICTED: vacuolar protein sorting-associated protein 35A-like [Solanum tuberosum]	Cellular Processes	Transport and catabolism	ko04144//Endocytosis	K18468	-	-	-	--
Unigene0001522	1.379	2.185	2.129	2.113	2.179	1.974	At4g26680	XP_015080966.1 pentatricopeptide repeat-containing protein At4g26680, mitochondrial [Solanum pennellii]	-	-	-	-	GO:0005575//cellular_component;GO:0005622//intracellular anatomical structure;GO:0005737//cytoplasm;GO:0005739//mitochondrion;GO:0043226//organelle;GO:0043227//membrane-bounded organelle;GO:0043229//intracellular organelle;GO:0043231//intracellular membrane-bounded organelle	GO:0003674//molecular_function;GO:0003676//nucleic acid binding;GO:0003723//RNA binding;GO:0003824//catalytic activity;GO:0004518//nuclease activity;GO:0004519//endonuclease activity;GO:0005488//binding;GO:0016787//hydrolase activity;GO:0016788//hydrolase activity, acting on ester bonds;GO:0097159//organic cyclic compound binding;GO:1901363//heterocyclic compound binding	GO:0000959//mitochondrial RNA metabolic process;GO:0000963//mitochondrial RNA processing;GO:0006139//nucleobase-containing compound metabolic process;GO:0006396//RNA processing;GO:0006397//mRNA processing;GO:0006725//cellular aromatic compound metabolic process;GO:0006807//nitrogen compound metabolic process;GO:0008150//biological_process;GO:0008152//metabolic process;GO:0009451//RNA modification…	--
Unigene0001524	0.315	0	0	0	0	0	--	-	-	-	-	-	-	-	-	--
Unigene0001525	1.895	0.908	1.441	11.696	12.505	12.074	ROMT	PHU26245.1 Trans-resveratrol di-O-methyltransferase [Capsicum chinense]	Metabolism;Metabolism;Metabolism	Global and overview maps;Global and overview maps;Amino acid metabolism	ko01100//Metabolic pathways;ko01110//Biosynthesis of secondary metabolites;ko00380//Tryptophan metabolism	K22588;K22588;K22588	GO:0005737//cytoplasm;GO:0016020//membrane	GO:0008171//O-methyltransferase activity;GO:0008757//S-adenosylmethionine-dependent methyltransferase activity;GO:0046983//protein dimerization activity	GO:0006412//translation;GO:0007349//cellularization;GO:0016051//carbohydrate biosynthetic process;GO:0018364//peptidyl-glutamine methylation	--
Unigene0001527	0.68	0.224	0.382	0.848	0.131	0.486	--	-	-	-	-	-	-	-	-	--
Unigene0001528	0.378	0.656	0.398	0.404	2.514	1.218	--	-	-	-	-	-	-	-	-	--
Unigene0001529	0	0	0.253	0	0.869	0	--	XP_009757738.1 PREDICTED: uncharacterized protein LOC104210521 isoform X3 [Nicotiana sylvestris]	-	-	-	-	-	GO:0003676//nucleic acid binding;GO:0004523//RNA-DNA hybrid ribonuclease activity	-	--
Unigene0001530	0	0	0.254	0	0.698	0	--	-	-	-	-	-	-	-	GO:0007165//signal transduction	--
Unigene0001532	0.931	0.369	0.47	0.531	0.789	0.8	--	XP_009757738.1 PREDICTED: uncharacterized protein LOC104210521 isoform X3 [Nicotiana sylvestris]	-	-	-	-	-	GO:0004197//cysteine-type endopeptidase activity	GO:0043687//post-translational protein modification	--
Unigene0001533	0	0	0.445	0.188	0.611	0.189	--	-	-	-	-	-	-	-	-	--
Unigene0001534	0.995	0.197	0.168	0.638	0.23	0.641	--	-	-	-	-	-	-	-	-	--
Unigene0001535	0.25	0	0.42	0	0	0	--	-	-	-	-	-	-	-	-	--
Unigene0001536	1.004	0	0.169	0	0	0	--	-	-	-	-	-	-	-	-	--
Unigene0001537	16.624	15.56	16.446	2.4	2.123	1.992	--	XP_019249143.1 PREDICTED: uncharacterized protein LOC109228493 isoform X1 [Nicotiana attenuata]	-	-	-	-	-	-	-	--
Unigene0001538	24.283	17.589	19.492	93.059	97.14	84.663	2024-04-03	KAH0699916.1 hypothetical protein KY284_014131 [Solanum tuberosum]	Metabolism;Metabolism	Global and overview maps;Energy metabolism	ko01100//Metabolic pathways;ko00920//Sulfur metabolism	K05907;K05907	GO:0005737//cytoplasm	GO:0000009//alpha-1,6-mannosyltransferase activity;GO:0003756//protein disulfide isomerase activity;GO:0003824//catalytic activity;GO:0004376//glycolipid mannosyltransferase activity;GO:0004604//phosphoadenylyl-sulfate reductase (thioredoxin) activity;GO:0009973//adenylyl-sulfate reductase activity;GO:0015036//disulfide oxidoreductase activity;GO:0016209//antioxidant activity;GO:0016491//oxidored…	GO:0006457//protein folding;GO:0006506//GPI anchor biosynthetic process;GO:0006790//sulfur compound metabolic process;GO:0010134//sulfate assimilation via adenylyl sulfate reduction;GO:0019379//sulfate assimilation, phosphoadenylyl sulfate reduction by phosphoadenylyl-sulfate reductase (thioredoxin)	--
Unigene0001539	0.244	0.604	0.205	0.652	0.845	0.131	RECQL3	XP_015080658.1 ATP-dependent DNA helicase Q-like 3 isoform X2 [Solanum pennellii]	-	-	-	-	GO:0005575//cellular_component;GO:0005622//intracellular anatomical structure;GO:0005634//nucleus;GO:0005694//chromosome;GO:0005737//cytoplasm;GO:0043226//organelle;GO:0043227//membrane-bounded organelle;GO:0043228//non-membrane-bounded organelle;GO:0043229//intracellular organelle;GO:0043231//intracellular membrane-bounded organelle;GO:0043232//intracellular non-membrane-bounded organelle	GO:0000166//nucleotide binding;GO:0003674//molecular_function;GO:0003676//nucleic acid binding;GO:0003677//DNA binding;GO:0003678//DNA helicase activity;GO:0003824//catalytic activity;GO:0004386//helicase activity;GO:0005488//binding;GO:0005524//ATP binding;GO:0008094//ATP-dependent activity, acting on DNA;GO:0009378//four-way junction helicase activity;GO:0016462//pyrophosphatase activity;GO:001…	GO:0000724//double-strand break repair via homologous recombination;GO:0000725//recombinational repair;GO:0006139//nucleobase-containing compound metabolic process;GO:0006259//DNA metabolic process;GO:0006281//DNA repair;GO:0006302//double-strand break repair;GO:0006310//DNA recombination;GO:0006725//cellular aromatic compound metabolic process;GO:0006807//nitrogen compound metabolic process;GO:0…	--
Unigene0001540	16.707	16.055	14.654	28.504	33.387	34.766	2024-04-03	XP_009613050.1 5'-adenylylsulfate reductase 3, chloroplastic-like [Nicotiana tomentosiformis]	Metabolism;Metabolism	Global and overview maps;Energy metabolism	ko01100//Metabolic pathways;ko00920//Sulfur metabolism	K05907;K05907	GO:0005737//cytoplasm	GO:0003756//protein disulfide isomerase activity;GO:0003824//catalytic activity;GO:0004604//phosphoadenylyl-sulfate reductase (thioredoxin) activity;GO:0009973//adenylyl-sulfate reductase activity;GO:0015036//disulfide oxidoreductase activity;GO:0016667//oxidoreductase activity, acting on a sulfur group of donors	GO:0006457//protein folding;GO:0006790//sulfur compound metabolic process;GO:0010134//sulfate assimilation via adenylyl sulfate reduction;GO:0019379//sulfate assimilation, phosphoadenylyl sulfate reduction by phosphoadenylyl-sulfate reductase (thioredoxin)	--
Unigene0001541	1.473	1.142	0.431	0.137	0.37	0.275	--	-	-	-	-	-	-	-	-	--
Unigene0001542	4.182	4.462	5.922	30.979	41.401	48.304	nmd3	XP_016475166.1 PREDICTED: 60S ribosomal export protein NMD3-like [Nicotiana tabacum]	Genetic Information Processing;Genetic Information Processing	Translation;Translation	ko03013//Nucleocytoplasmic transport;ko03008//Ribosome biogenesis in eukaryotes	K07562;K07562	-	-	-	--
Unigene0001544	1.928	2.765	2.462	0.213	0.038	0.036	At1g11330	XP_033508169.1 G-type lectin S-receptor-like serine/threonine-protein kinase At1g11330 isoform X1 [Nicotiana tomentosiformis]	-	-	-	-	-	GO:0004672//protein kinase activity;GO:0005524//ATP binding	GO:0006468//protein phosphorylation;GO:0048544//recognition of pollen	--
Unigene0001545	5.258	6.234	9.319	1.775	0.08	1.263	TR1	PHT36320.1 Tropinone reductase -like protein [Capsicum baccatum]	Metabolism;Metabolism;Metabolism	Global and overview maps;Global and overview maps;Biosynthesis of other secondary metabolites	ko01100//Metabolic pathways;ko01110//Biosynthesis of secondary metabolites;ko00960//Tropane, piperidine and pyridine alkaloid biosynthesis	K08081;K08081;K08081	-	GO:0003674//molecular_function;GO:0003824//catalytic activity;GO:0004316//3-oxoacyl-[acyl-carrier-protein] reductase (NADPH) activity;GO:0004757//sepiapterin reductase activity;GO:0008667//2,3-dihydro-2,3-dihydroxybenzoate dehydrogenase activity;GO:0008678//2-deoxy-D-gluconate 3-dehydrogenase activity;GO:0016491//oxidoreductase activity;GO:0016630//protochlorophyllide reductase activity;GO:005128…	GO:0000272//polysaccharide catabolic process;GO:0006633//fatty acid biosynthetic process;GO:0006729//tetrahydrobiopterin biosynthetic process;GO:0008150//biological_process;GO:0008152//metabolic process;GO:0015995//chlorophyll biosynthetic process	--
Unigene0001546	6.921	12.232	4.755	1.924	1.507	1.499	TCX2	XP_016565918.1 PREDICTED: protein tesmin/TSO1-like CXC 3 isoform X1 [Capsicum annuum]	-	-	-	-	-	GO:0016168//chlorophyll binding	GO:0009765//photosynthesis, light harvesting	CPP
Unigene0001547	0.144	0.57	1.21	1.383	0.665	0.309	--	-	-	-	-	-	-	-	-	--
Unigene0001548	0	0	0	0	0.411	0	--	-	-	-	-	-	-	-	-	--
Unigene0001549	23.516	26.478	24.298	33.65	38.663	40.757	MED26B	KAH0721743.1 hypothetical protein KY284_006773 [Solanum tuberosum]	-	-	-	-	GO:0005634//nucleus	GO:0003711//transcription elongation regulator activity	-	--
Unigene0001550	0.711	0	0	0	0	0	--	-	-	-	-	-	-	-	-	--
Unigene0001551	5.091	5.908	6.898	1.105	0.368	0.769	At3g22104	KAF3638862.1 putative scarecrow-like protein 32-like [Capsicum annuum]	-	-	-	-	-	GO:0005515//protein binding	GO:0006464//cellular protein modification process;GO:0006807//nitrogen compound metabolic process;GO:0008150//biological_process;GO:0008152//metabolic process;GO:0009987//cellular process;GO:0016567//protein ubiquitination;GO:0019538//protein metabolic process;GO:0032446//protein modification by small protein conjugation;GO:0036211//protein modification process;GO:0043170//macromolecule metabolic…	--
Unigene0001552	13.46	16.148	14.293	82.188	73.153	76.887	AK1	PHT60440.1 Aspartokinase 3, chloroplastic [Capsicum baccatum]	Metabolism;Metabolism;Metabolism;Metabolism;Metabolism;Metabolism;Metabolism;Metabolism	Global and overview maps;Global and overview maps;Global and overview maps;Amino acid metabolism;Amino acid metabolism;Global and overview maps;Amino acid metabolism;Biosynthesis of other secondary metabolites	ko01100//Metabolic pathways;ko01110//Biosynthesis of secondary metabolites;ko01230//Biosynthesis of amino acids;ko00270//Cysteine and methionine metabolism;ko00260//Glycine, serine and threonine metabolism;ko01210//2-Oxocarboxylic acid metabolism;ko00300//Lysine biosynthesis;ko00261//Monobactam biosynthesis	K00928;K00928;K00928;K00928;K00928;K00928;K00928;K00928	GO:0005575//cellular_component;GO:0005622//intracellular anatomical structure;GO:0005737//cytoplasm;GO:0009507//chloroplast;GO:0009532//plastid stroma;GO:0009536//plastid;GO:0009570//chloroplast stroma;GO:0043226//organelle;GO:0043227//membrane-bounded organelle;GO:0043229//intracellular organelle;GO:0043231//intracellular membrane-bounded organelle	GO:0000166//nucleotide binding;GO:0003674//molecular_function;GO:0003824//catalytic activity;GO:0004072//aspartate kinase activity;GO:0005488//binding;GO:0005524//ATP binding;GO:0016301//kinase activity;GO:0016740//transferase activity;GO:0016772//transferase activity, transferring phosphorus-containing groups;GO:0016774//phosphotransferase activity, carboxyl group as acceptor;GO:0017076//purine …	GO:0006082//organic acid metabolic process;GO:0006520//cellular amino acid metabolic process;GO:0006553//lysine metabolic process;GO:0006566//threonine metabolic process;GO:0006730//one-carbon metabolic process;GO:0006793//phosphorus metabolic process;GO:0006796//phosphate-containing compound metabolic process;GO:0006807//nitrogen compound metabolic process;GO:0008150//biological_process;GO:00081…	--
Unigene0001553	0	1.284	0	0.346	0.187	0.174	--	-	-	-	-	-	-	-	-	--
Unigene0001554	0.824	0.714	0.347	0.55	0.595	0.442	--	-	-	-	-	-	-	-	-	--
Unigene0001555	0.171	0.169	0	0.73	0.79	1.1	--	-	-	-	-	-	-	-	-	--
Unigene0001556	4.004	5.268	6.838	3.118	3.239	2.088	--	XP_016467883.1 PREDICTED: indole-3-glycerol phosphate synthase, chloroplastic-like [Nicotiana tabacum]	Metabolism;Metabolism;Metabolism;Metabolism	Global and overview maps;Global and overview maps;Global and overview maps;Amino acid metabolism	ko01100//Metabolic pathways;ko01110//Biosynthesis of secondary metabolites;ko01230//Biosynthesis of amino acids;ko00400//Phenylalanine, tyrosine and tryptophan biosynthesis	K01609;K01609;K01609;K01609	-	-	-	--
Unigene0001557	9.345	8.269	8.536	17.215	13.175	18.64	PSE1	XP_009593066.1 uncharacterized protein LOC104089794 [Nicotiana tomentosiformis]	-	-	-	-	-	-	-	--
Unigene0001558	20.061	22.044	17.07	0.463	0.125	0.077	PII-2	XP_016548422.1 PREDICTED: piriformospora indica-insensitive protein 2-like [Capsicum annuum]	-	-	-	-	-	GO:0005515//protein binding	-	--
Unigene0001559	0	0	0	0	0.375	0	--	-	-	-	-	-	GO:0005576//extracellular region	-	-	--
Unigene0001561	3.016	5.13	4.036	0.909	2.055	1.743	UGNT1	XP_019256593.1 PREDICTED: UDP-sugar transporter sqv-7-like [Nicotiana attenuata]	-	-	-	-	GO:0016020//membrane;GO:0016021//integral component of membrane	-	GO:0055085//transmembrane transport	--
Unigene0001562	0.419	1.728	0.529	0	0	0	UGNT1	XP_027769876.1 LOW QUALITY PROTEIN: nucleotide-sugar uncharacterized transporter 3-like [Solanum pennellii]	-	-	-	-	-	-	-	--
Unigene0001565	7.186	7.023	7.464	13.218	9.977	13.324	EFM	PHT51931.1 hypothetical protein CQW23_06393 [Capsicum baccatum]	-	-	-	-	GO:0005575//cellular_component;GO:0005622//intracellular anatomical structure;GO:0005634//nucleus;GO:0043226//organelle;GO:0043227//membrane-bounded organelle;GO:0043229//intracellular organelle;GO:0043231//intracellular membrane-bounded organelle	GO:0003674//molecular_function;GO:0003676//nucleic acid binding;GO:0003677//DNA binding;GO:0003700//DNA-binding transcription factor activity;GO:0005488//binding;GO:0097159//organic cyclic compound binding;GO:0140110//transcription regulator activity;GO:1901363//heterocyclic compound binding	GO:0000003//reproduction;GO:0000160//phosphorelay signal transduction system;GO:0001101//response to acid chemical;GO:0003006//developmental process involved in reproduction;GO:0006139//nucleobase-containing compound metabolic process;GO:0006325//chromatin organization;GO:0006351//transcription, DNA-templated;GO:0006355//regulation of transcription, DNA-templated;GO:0006464//cellular protein modi…	G2-like
Unigene0001566	0.281	0	0	0	0	0.603	--	-	-	-	-	-	-	-	-	--
Unigene0001567	51.546	60.578	52.815	47.927	47.751	47.419	EMB1027	XP_019260546.1 PREDICTED: arginine--tRNA ligase, cytoplasmic-like isoform X1 [Nicotiana attenuata]	Genetic Information Processing	Translation	ko00970//Aminoacyl-tRNA biosynthesis	K01887	GO:0005737//cytoplasm	GO:0000166//nucleotide binding;GO:0004814//arginine-tRNA ligase activity;GO:0005524//ATP binding	GO:0006420//arginyl-tRNA aminoacylation	--
Unigene0001568	0.968	0.087	0.148	0.188	0.102	0.567	--	-	-	-	-	-	-	-	-	--
Unigene0001569	0.293	0.483	0.986	0.522	0.451	0.838	--	-	-	-	-	-	-	-	-	--
Unigene0001571	0	0.675	0.287	0	0	0	--	-	-	-	-	-	-	-	-	--
Unigene0001573	3.974	4.154	4.693	0.649	0.861	0.889	--	KAG5586438.1 hypothetical protein H5410_046872 [Solanum commersonii]	-	-	-	-	-	-	-	--
Unigene0001574	1.916	1.762	1.844	0	0	0	--	XP_015162650.1 PREDICTED: LOW QUALITY PROTEIN: pentatricopeptide repeat-containing protein At1g64100-like [Solanum tuberosum]	-	-	-	-	-	-	-	--
Unigene0001575	1.102	0	0	0	0	0	--	PHT32651.1 hypothetical protein CQW23_28988 [Capsicum baccatum]	-	-	-	-	-	-	-	--
Unigene0001576	31.38	28.408	28.579	18.177	24.885	23.442	--	XP_009789046.1 PREDICTED: uncharacterized protein LOC104236753 isoform X1 [Nicotiana sylvestris]	-	-	-	-	-	GO:0008080//N-acetyltransferase activity;GO:0008999//ribosomal-protein-alanine N-acetyltransferase activity;GO:0016747//acyltransferase activity, transferring groups other than amino-acyl groups	GO:0006464//cellular protein modification process;GO:0042254//ribosome biogenesis	--
Unigene0001577	1.205	0.944	1.056	0.751	0.754	0.97	--	-	-	-	-	-	-	-	-	--
Unigene0001578	0.577	0.381	0.162	0.822	0.111	0.413	FAD7A-1	XP_016575750.1 PREDICTED: omega-3 fatty acid desaturase, endoplasmic reticulum-like [Capsicum annuum]	-	-	-	-	-	GO:0016717//oxidoreductase activity, acting on paired donors, with oxidation of a pair of donors resulting in the reduction of molecular oxygen to two molecules of water	GO:0006629//lipid metabolic process	--
Unigene0001579	8.797	11.436	5.944	3.902	4.634	4.882	FAD3	XP_015077953.1 omega-3 fatty acid desaturase, endoplasmic reticulum-like [Solanum pennellii]	-	-	-	-	-	GO:0016717//oxidoreductase activity, acting on paired donors, with oxidation of a pair of donors resulting in the reduction of molecular oxygen to two molecules of water	GO:0006629//lipid metabolic process	--
Unigene0001581	0	0	0	0.293	0	0	--	XP_009599200.1 uncharacterized protein LOC104094889 [Nicotiana tomentosiformis]	-	-	-	-	GO:0000123//histone acetyltransferase complex;GO:0000124//SAGA complex;GO:0000775//chromosome, centromeric region;GO:0005575//cellular_component;GO:0005622//intracellular anatomical structure;GO:0005634//nucleus;GO:0005654//nucleoplasm;GO:0005694//chromosome;GO:0005737//cytoplasm;GO:0005829//cytosol;GO:0031248//protein acetyltransferase complex;GO:0031974//membrane-enclosed lumen;GO:0031981//nucl…	GO:0003674//molecular_function;GO:0003712//transcription coregulator activity;GO:0003713//transcription coactivator activity;GO:0003779//actin binding;GO:0003824//catalytic activity;GO:0004402//histone acetyltransferase activity;GO:0005488//binding;GO:0005515//protein binding;GO:0008080//N-acetyltransferase activity;GO:0008092//cytoskeletal protein binding;GO:0010484//H3 histone acetyltransferase…	GO:0002009//morphogenesis of an epithelium;GO:0002165//instar larval or pupal development;GO:0003002//regionalization;GO:0003008//system process;GO:0006139//nucleobase-containing compound metabolic process;GO:0006325//chromatin organization;GO:0006338//chromatin remodeling;GO:0006351//transcription, DNA-templated;GO:0006355//regulation of transcription, DNA-templated;GO:0006357//regulation of tra…	--
Unigene0001582	0	0	0.216	0	1.481	0.275	At4g32640	XP_006345830.1 PREDICTED: protein transport protein Sec24-like At4g32640 isoform X1 [Solanum tuberosum]	Genetic Information Processing	Folding, sorting and degradation	ko04141//Protein processing in endoplasmic reticulum	K14007	GO:0030127//COPII vesicle coat	GO:0008270//zinc ion binding	GO:0006886//intracellular protein transport;GO:0006888//endoplasmic reticulum to Golgi vesicle-mediated transport	--
[truncated: 62,368 more rows]
